# Supplementary material for: Age-period-cohort analysis and projection of cancer mortality in Hong Kong, 1998–2030
Source: PubMed Central journal article supplement (PMC10583025; doi:10.1136/bmjopen-2023-072751), 2023-10-11
Supplement: bmjopen-2023-072751.draft_revisions.pdf [file bmjopen-2023-072751.draft_revisions.pdf]

# BMJ Open

BMJ Open is committed to open peer review. As part of this commitment we make the peer review history of every article we publish publicly available.

When an article is published we post the peer reviewers' comments and the authors' responses online. We also post the versions of the paper that were used during peer review. These are the versions that the peer review comments apply to.

The versions of the paper that follow are the versions that were submitted during the peer review process. They are not the versions of record or the final published versions. They should not be cited or distributed as the published version of this manuscript.

BMJ Open is an open access journal and the full, final, typeset and author-corrected version of record of the manuscript is available on our site with no access controls, subscription charges or pay-per-view fees (<http://bmjopen.bmj.com>).

If you have any questions on BMJ Open's open peer review process please email [info.bmjopen@bmj.com](mailto:info.bmjopen@bmj.com)

# BMJ Open

## An age-period-cohort analysis and projection of cancer mortality in Hong Kong, 1998–2030

|                               |                                                                                                                                                                                                                                                                                                                                                                                                                                                                                         |
|-------------------------------|-----------------------------------------------------------------------------------------------------------------------------------------------------------------------------------------------------------------------------------------------------------------------------------------------------------------------------------------------------------------------------------------------------------------------------------------------------------------------------------------|
| Journal:                      | <i>BMJ Open</i>                                                                                                                                                                                                                                                                                                                                                                                                                                                                         |
| Manuscript ID                 | bmjopen-2023-072751                                                                                                                                                                                                                                                                                                                                                                                                                                                                     |
| Article Type:                 | Original research                                                                                                                                                                                                                                                                                                                                                                                                                                                                       |
| Date Submitted by the Author: | 13-Feb-2023                                                                                                                                                                                                                                                                                                                                                                                                                                                                             |
| Complete List of Authors:     | Zhao, Yanji; The Hong Kong Polytechnic University, Department of Applied Mathematics<br>Zhuang, Zian; The Hong Kong Polytechnic University, Department of Applied Mathematics; University of California Los Angeles, Department of Biostatistics<br>Yang, Lin; The Hong Kong Polytechnic University, School of Nursing<br>He, Daihai; The Hong Kong Polytechnic University, Department of Applied Mathematics; The Hong Kong Polytechnic University, Research Institute for Future Food |
| Keywords:                     | STATISTICS & RESEARCH METHODS, ONCOLOGY, Risk Factors                                                                                                                                                                                                                                                                                                                                                                                                                                   |
|                               |                                                                                                                                                                                                                                                                                                                                                                                                                                                                                         |

SCHOLARONE™  
Manuscripts

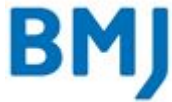

I, the Submitting Author has the right to grant and does grant on behalf of all authors of the Work (as defined in the below author licence), an exclusive licence and/or a non-exclusive licence for contributions from authors who are: i) UK Crown employees; ii) where BMJ has agreed a CC-BY licence shall apply, and/or iii) in accordance with the terms applicable for US Federal Government officers or employees acting as part of their official duties; on a worldwide, perpetual, irrevocable, royalty-free basis to BMJ Publishing Group Ltd ("BMJ") its licensees and where the relevant Journal is co-owned by BMJ to the co-owners of the Journal, to publish the Work in this journal and any other BMJ products and to exploit all rights, as set out in our [licence](#).

The Submitting Author accepts and understands that any supply made under these terms is made by BMJ to the Submitting Author unless you are acting as an employee on behalf of your employer or a postgraduate student of an affiliated institution which is paying any applicable article publishing charge ("APC") for Open Access articles. Where the Submitting Author wishes to make the Work available on an Open Access basis (and intends to pay the relevant APC), the terms of reuse of such Open Access shall be governed by a Creative Commons licence – details of these licences and which [Creative Commons](#) licence will apply to this Work are set out in our licence referred to above.

Other than as permitted in any relevant BMJ Author's Self Archiving Policies, I confirm this Work has not been accepted for publication elsewhere, is not being considered for publication elsewhere and does not duplicate material already published. I confirm all authors consent to publication of this Work and authorise the granting of this licence.

# An age-period-cohort analysis and projection of cancer mortality in Hong Kong, 1998–2030

Yanji Zhao<sup>1, #</sup>, Zian Zhuang<sup>1,2, #</sup>, Lin Yang<sup>3</sup> and Daihai He<sup>1,4\*</sup>

1 Department of Applied Mathematics, Hong Kong Polytechnic University, Hong Kong, China

2 Department of Biostatistics, University of California, Los Angeles, CA, United States

3 School of Nursing, Hong Kong Polytechnic University, Hong Kong, China

4 Research Institute for Future Food, Hong Kong Polytechnic University, Hong Kong, China

# These authors contributed equally to this work.

\* To whom correspondence should be addressed:

Department of Applied Mathematics, The Hong Kong Polytechnic University, Hong Kong, China

Tel: 852-27667864; [daihai.he@polyu.edu.hk](mailto:daihai.he@polyu.edu.hk) (DH).

## Email of all authors

Yanji Zhao: [yan-ji.zhao@connect.polyu.hk](mailto:yan-ji.zhao@connect.polyu.hk); Zian Zhuang: [zianzhuang@ucla.edu](mailto:zianzhuang@ucla.edu);

Yang Lin: [l.yang@polyu.edu.hk](mailto:l.yang@polyu.edu.hk); Daihai He: [daihai.he@polyu.edu.hk](mailto:daihai.he@polyu.edu.hk).

*Word count: 2954*



## 24 **Abstract**

25 **Objectives:** Explore age, period, birth cohort effects and effects across different genders and  
26 immigration groups on mortality rates of lung, pancreatic, colon, liver, prostate and stomach  
27 cancers and their projections.

28  
29 **Design, Setting, and Participants:** Death registry data in Hong Kong between 1998 and 2021.  
30 The population data were stratified by age, sex, immigration status, and length of stay in Hong  
31 Kong. Immigration status was classified into three groups: locals born in Hong Kong, long-stay  
32 immigrants and short-stay immigrants.

33  
34 **Main Outcomes and Measures:** Age-period-cohort analysis was used to examine age, period,  
35 and birth cohort effects for genders and immigration groups from 1998 to 2021. Bayesian age-  
36 period-cohort models were applied to predict the mortality rates from 2022 to 2030.

37  
38 **Results:** Short-stay immigrants indicated relatively pronounced fluctuations in age, cohort and  
39 period effects for six types of cancers, as increasing trends of age effect occurred for both  
40 genders and all immigration groups. Monotone decreasing trends or plateau of forecasting  
41 occur for both genders and all immigration groups in cancers except for increasing trends for  
42 short-stay male immigrants with colon cancer and long-stay male immigrants with pancreatic  
43 cancer. Long-stay male immigrants with lung cancer would perform the most significant  
44 decline in predictive mean from 100.18 to 79.55 deaths/100,000 population, while the same  
45 immigration group with pancreatic cancer would indicate the most significant uptrend in each  
46 year of 17.87 deaths and 23.49 deaths/100,000 population in 2022 and 2030, respectively.

47  
48 **Conclusions** Immigrants had more pronounced fluctuations and sharper slopes of age, cohort,  
49 and period effects than locals. Men will be at a higher risk of mortality from cancers than  
50 women in the future, except for prostate cancer. Long-stay immigrants for each type of cancer  
51 and gender will be at a higher mortality risk than locals.

52  
53 **Keywords:** Age-period-cohort analysis, immigration, mortality, lung cancer, pancreatic cancer,  
54 colon cancer, liver cancer, prostate cancer, stomach cancer

55

1  
2  
3  
4  
5  
6  
7  
8  
9  
10  
11  
12  
13  
14  
15  
16  
17  
18  
19  
20  
21  
22  
23  
24  
25  
26  
27  
28  
29  
30  
31  
32  
33  
34  
35  
36  
37  
38  
39  
40  
41  
42  
43  
44  
45  
46  
47  
48  
49  
50  
51  
52  
53  
54  
55  
56  
57  
58  
59  
60  
61  
62  
63  
64  
65  
66

## 56 **Strengths and limitations of this study**

- 58 • Complicated population distribution has resulted in intricate causes of cancers, while few  
59 studies have assessed the relationship between immigration status and cancer mortality.  
60 This study provides new evidence regarding the relationship between immigration status  
61 and cancer mortality.
- 63 • We could only depict trends and variations among different immigration and sex groups  
64 and insufficiently perform the estimates of the contributions of three effects or subgroups  
65 to mortality rates.

For peer review only

## 67 **Introduction**

68 Several migration waves from mainland China to Hong Kong have occurred over the past  
69 century. These migration waves included a large-scale migration inflow from 1945 to 1950 (the  
70 Chinese Civil War) and a few small-scale inflows in the 1950s, 1970s, and 1990s [1-3]. In 2016,  
71 immigrants from mainland China formed approximately 38% of the population of Hong Kong.  
72 These inflows have led to a growing interest in research on the disparity of health conditions  
73 between the locals and immigrants.

74  
75 Cancer has been one of most common causes of death, as an estimated 19.3 million new cancer  
76 cases and 9.9 million new cancer-associated deaths occurred worldwide in 2020 [4]. In Hong  
77 Kong, lung cancer is one of the most common causes of cancer deaths [5, 6]. Previous studies  
78 suggested that the primary cause of lung cancer is cigarette smoking [7-11]. Genetic factors,  
79 asbestos, radon gas, second-hand smoke, and other forms of air pollution have been proven to  
80 influence the risk of lung cancer [12-18]. The overall daily smoking rate in mainland China was  
81 approximately 23.2% in 2018 [21], whereas the daily smoking rate in Hong Kong was only  
82 10.2% in 2019 [22]. The leading causes of liver cancer include viral infection, drinking of  
83 alcohol and polluted water and food supplies which are also culprits for colon, stomach and  
84 pancreatic cancer [19]. Alcohol consumption per capita in Hong Kong has reached to 2.37 liters  
85 in 2021 [23], compared to 7.0 liters of per capita consumption of alcohol in mainland China in  
86 2018 [24]. As approximately 99% of prostate cancer cases occur after age 50, factors of prostate  
87 cancer have been regarded as old age, race, family history and the diet of red meat consumption  
88 [20]. In addition to these risk factors, studies have suggested that cancer mortality rates vary  
89 depending on migrant status [25-28]. According to data from the Census and Statistics  
90 Department of Hong Kong, approximately 81% of immigrants in Hong Kong immigrated from  
91 China mainland, Macau, and Taiwan. Immigrants from mainland China account for a bulk of  
92 this population. Previous studies have shown that child immigrants in Hong Kong tend to suffer  
93 from a higher risk of wheezing disorders and cardiovascular diseases, and immigrant women  
94 have higher age-specific mortality rates of breast cancer than locally-born women in Hong  
95 Kong [29, 30]. However, to date, few studies have investigated the effect of length of stay in  
96 Hong Kong and birthplace on the risk of other types of cancer.

97  
98 In this study, we compared the mortality rates of lung, pancreatic, colon, liver, prostate and  
99 stomach cancers between locally born residents in Hong Kong and immigrants from mainland  
100 China. Both populations are widely considered as ethnically homogeneous with similar cultures.  
101 Nevertheless, due to different early life experiences, immigrants are exposed to more various  
102 social economy and lifestyle than locals. Therefore, it's constructive to ascertain whether  
103 immigrants from mainland China have a different mortality pattern of cancers with locals to

1  
2  
3  
4 104 verify the significance of migration status for this health outcome. As Age-period-cohort (APC)  
5 105 analysis plays a vital role in studying time-specific phenomena in epidemiology, in this study,  
6 106 we developed APC models specified by sex and migrant status to assess the effects of age,  
7 107 period, birth cohort, and of the length of stay in Hong Kong on the mortality risks of cancers.  
8 108 Additionally, we predicted the mortality rates for the locally born population and immigrants  
9 109 in Hong Kong for the next 9 years using a predictive model, taking into account age, period,  
10 110 and birth cohort effects as well.  
11 111

## 112 **Materials and methods**

### 113 *Data*

114 We obtained the death registry data in Hong Kong between 1998 and 2021 from the Census  
115 and Statistics Department of Hong Kong, as the data in 2022 has not been available up to now.  
116 The population data were stratified by age, sex, immigration status, and length of stay in Hong  
117 Kong. We retrieved six types of cancer cases from the death registry data using ICD codes,  
118 such as ICD-9 code 162 and ICD-10 codes C34.0–C34.3, C348, and C349 for lung cancer. To  
119 assure comparability among registries, deaths from the age group of 35–85 years were selected,  
120 since cases younger than 35 and older than 85 were relatively trivial for lack of statistical  
121 interpretability [31]. Immigration status was classified into three groups: locals born in Hong  
122 Kong, immigrants who have lived in Hong Kong for >10 years before death defined as long-  
123 stay immigrants, and immigrants who have lived in Hong Kong for ≤10 years before death  
124 defined as short-stay immigrants. Notably, much focus was placed on immigrants from  
125 mainland China, because approximately 81% of immigrants in Hong Kong came from  
126 mainland China, Macau, and Taiwan based on the data from the Census and Statistics  
127 Department of Hong Kong. Moreover, few cases recorded from Macau and Taiwan are  
128 statistically insignificant in the analysis. Demographics and population projections from 2022  
129 to 2030 were retrieved from the Census and Statistics Department of Hong Kong and estimated  
130 with cubic smoothing spline as the prerequisite of the predictive model. Codes for APC and  
131 BAPC analysis are available in the GitHub repository ([https://github.com/kshz2164313/APC-  
132 population-projections-for-immigration-HK](https://github.com/kshz2164313/APC-population-projections-for-immigration-HK)).  
133

### 134 *Patient and Public Involvement*

135 No patient involved. Death registry data was obtained from Census and Statistics Department  
136 of Hong Kong.  
137

### 138 *Statistical analysis*

139 We modeled cancer mortality rates in Hong Kong using APC analysis based on log-linear  
140 Poisson regression models. The model aimed to disentangle age, period, and cohort effects of

1  
2  
3  
4 141 time-varying phenomena simultaneously [32, 33], given that

5 142 
$$\log(E_{ij}) = \alpha_i + \beta_j + \gamma_k + \mu + \log(\theta_{ij}) \quad (1)$$

7 143 where  $E_{ij}$  denotes expected mortality;  $\alpha_i$ ,  $\beta_j$ , and  $\gamma_k$  denote age, period, and cohort  
8  
9 144 effect, respectively, for  $i = 1, \dots, I$ ,  $j = 1, \dots, J$ ,  $k = 1, \dots, K$  with  $k = I - i + j$ .

10  
11 145  $\log(\theta_{ij})$  is the offset. We mainly focused on the contributions of sex and immigration status  
12  
13 146 due to the non-identifiability problem that the effects of these three components are collinear  
14  
15 147 with each other (denoted as period – age = cohort) [34]. The median dates of birth among  
16  
17 148 cases were regarded as the reference cohort, while the second and penultimate period effects  
18  
19 149 were constrained to the reference groups, as birth cohort effect and period effect were  
20  
21 150 assessed with relative risks. For sex and immigration status, maximum likelihood framework  
22  
23 151 was applied to estimate the relative risks and 95% confidence intervals (CIs) by age groups,  
24  
25 152 calendar period, and birth cohort.

26  
27 153  
28  
29 154 Several projection approaches for future cancer mortality have been developed, but a  
30  
31 155 Bayesian age-period-cohort (BAPC) model built upon integrated nested Laplace  
32  
33 156 approximations (INLA) [35] yields relatively higher coverage and better performance for all  
34  
35 157 evaluated parameter combinations [36]. To prevent some sampling problems caused by  
36  
37 158 Markov chain Monte Carlo (MCMC), this MCMC-free BAPC approach was applied to  
38  
39 159 predict future cancer mortality within a fully Bayesian inference setting and provide outputs  
40  
41 160 of interest simply, such as projected age-standardized and age-specific rates. Convergence  
42  
43 161 checks are not necessary for this technique [35]. The projections of age-standardized cancer  
44  
45 162 mortality rates for each sex and migrant status, taking into account age, period, and birth  
46  
47 163 cohort effects, were performed based on the weights of population age groups from the WHO  
48  
49 164 World Standard population [37], with 95% prediction intervals.

50  
51 165  
52  
53 166 All analyses were performed via R version 4.2.1 (R Core Team, R Foundation for Statistical  
54  
55 167 Computing, Vienna, Austria, 2013, <http://www.R-project.org/>). The APC models were  
56  
57 168 established using the Epi package, and the projections based on Bayesian APC models were  
58  
59 169 performed with the BAPC package.

## 60 61 170 62 63 171 64 65 172 66 67 173 **Results**

68  
69 174 Figure 1ab, eFigure 1-4ab and eFigure 5a in Supplement 1 illustrate the estimates of age  
70  
71 175 (assessed by cancer mortality), period and cohort effects (assessed by relative risk) based on  
72  
73 176 APC models among three migrant groups for men and women with six types of cancers,  
74  
75 177 respectively. All the mortality rates for each gender and immigration status exhibit notable  
76  
77 178 increasing trends with age. Compared to other immigration groups, age, cohort and period

179 effects of six types of cancer for immigrants who stayed in Hong Kong for  $\leq 10$  years revealed  
180 relatively more pronounced fluctuations and deviations from those effects in other immigration  
181 groups. Significant increasing trends of age effect occurred in all types of cancer, regardless of  
182 gender and immigration status. For example, compared to no significant effects of immigration  
183 status for women on mortality rates of lung cancer by age (Figure 1b), the higher age effect for  
184 men who have stayed in Hong Kong for  $> 10$  years occurred after the age of 50 years and the  
185 lower age effect of men who had short stays occurred before the age of 62 years (Figure 1a). In  
186 addition to compatible dynamics of period effect for locals and long-stay immigrants, similar  
187 birth cohort effects for locals and long-stay immigrants in lung, colon, liver and stomach  
188 cancers occurred before 1945, whereas significant differences of birth cohort effects between  
189 these two immigration groups occurred after 1960. Locals and long-stay immigrants in  
190 pancreatic and prostate cancer perform almost similar cohort effects all the time. Local men  
191 and women had sharper slopes of cohort effect of short stay after 1950 than other immigration  
192 groups. Short-stay immigrants who have stayed in Hong Kong for  $\leq 10$  years had more  
193 fluctuating period effects before 2020 than those for locals and long-stay immigrants. Lack of  
194 young cases, especially young short-stay immigrants, of prostate cancer leads to significant  
195 deviations and variances in age and cohort effects.

196  
197 Figure 1c, eFigure 1-4c and eFigure 5b in Supplement 1 illustrates the age-standardized  
198 mortality rates of six types of cancer from 1998 to 2021 and their projections by sex and  
199 immigrant status from 2022 to 2030, taking into account age, period, and birth cohort effects.  
200 Means and standard deviations of predictive mortality rates are shown in Table 1, Table 2 and  
201 eTable 1-4 in Supplement 1. Monotone decreasing trends or plateau of forecasting occur for  
202 both genders and all immigration groups in cancers except for increasing trends for male  
203 immigrants who have stayed in Hong Kong for  $\leq 10$  years with colon cancer and male  
204 immigrants who have stayed in Hong Kong for  $> 10$  years with pancreatic cancer. Except for  
205 prostate cancer, men will be at higher risk of mortality rates of cancers than women in the  
206 future. Given the future developing trends of other groups, the group of immigrant men who  
207 have stayed in Hong Kong for  $> 10$  years with lung, liver, pancreatic, prostate and colon cancer  
208 will have relatively higher mortality rates in each year compared with other immigration groups  
209 and pronounced decline in predictive mean. Compared with other cancers and immigration  
210 groups, male immigrants who have stayed in Hong Kong for  $> 10$  years with lung cancer would  
211 perform the most significant decline in predictive mean from 100.18 to 79.55 deaths per  
212 100,000 population (average 2.92 deaths/100,000 per annum) (Table 1), while the same  
213 immigration group with pancreatic cancer would indicate the most significant uptrend in each  
214 year of 17.87 deaths and 23.49 deaths per 100,000 population in 2022 and 2030, respectively  
215 (average 0.62 deaths/100,000 per annum) (Table 2).

216



217

**218 Discussion**

219 Early detection of cancer is positive and instructive for increasing chances of cure. Nevertheless,  
220 the high mortality rate of cancer results from late diagnosis among most patients after  
221 progression to more advanced or severe stages. Individuals at high risk of cancer, such as  
222 smokers, alcoholics or those who are frequently exposed to susceptible circumstances, should  
223 be screened for early detections to increase opportunities for cure [38]. Therefore, the  
224 differences in mortality rates among immigration groups are synonymous with detection means,  
225 therapies, and social history in disparate periods and areas.

226  
227 Age effects for both genders and all immigrant groups revealed pronounced increasing trends  
228 on all cancer mortality rates. The group of long-stay immigrants had a higher risk of death  
229 from lung, colon and liver cancers than the other two immigration groups after the age of 60  
230 years. Short-stay male immigrants were less likely to die from lung cancer before the age of  
231 65 years. The contrast in age effects among the immigration groups was partially consistent  
232 with studies [25, 39] that highlighted the age effects for locals and immigrants on breast  
233 cancer mortality in Hong Kong and lung cancer incidence in Sweden, as they both showed  
234 similar trends and magnitudes between locals and immigrants before the age of 60 years.  
235 They are also compatible with the results in [40] that diagnosis of liver cancer is the most  
236 frequent among populations at 55 to 65 years old. According to these trends, young  
237 individuals, especially new young immigrant men, who have benefited from all-rounded  
238 development in mainland China and Hong Kong, are more likely to seek early detection and  
239 be treated for cancers using more advanced treatments [41]. Differences in birth cohort effects  
240 among immigrant groups partially comply with the interpretation above.

241  
242 We observed significant trends of cohort effects among locals and immigrants. These findings  
243 are partially consistent but subtly different from previous findings, regarding the effect of  
244 immigration status on cancers. Zhao et al. [25] described multiple peaks of cohort effects on  
245 breast cancer mortality between locals and immigrants in Hong Kong, as well as a significant  
246 decline of cohort effects after 1950. In contrast, Sung et al. [42] investigated the difference in  
247 breast cancer incidence between Chinese Americans and non-Hispanic whites in the U.S. and  
248 emphasized that Chinese Americans were at lower risk of breast cancer than non-Hispanic  
249 whites born in the same year. Here, we interpret the cohort-driven trends resulting from the  
250 intricacy of social history and lifestyle. Compared to a relatively stable social development in  
251 Hong Kong, representing downward trends of relative risks for locals, wars and social  
252 instability in mainland China resulted in several immigration waves from mainland China to  
253 Hong Kong before 1950. Additionally, remarkable increasing trends were recorded for new

1  
2  
3 254 immigrants after 1950, which corresponded to the economic downturn after wars and famine  
4 255 between 1959 and 1961 during their youth [43]. The increasing trends for new immigrants  
5 256 and similar trends for locals and long-stay immigrants were consistent with the finding that  
6 257 nutrient deficiency contributes to higher risk of severe mortality rates of cancers [44].  
7  
8 258 Furthermore, we speculate that these trends, especially those for locals and long-stay  
9 259 immigrants, are most likely attributed to social development and personal behaviors, such as  
10 260 daily habits, occupational history, different diagnoses and treatments, and domestic  
11 261 environmental exposures. It's notable that short-stay immigrants suffered from lower risk of  
12 262 death from colon cancer for all ages (eFigure 2ab in Supplement 1). As locals and immigrants  
13 263 in Hong Kong transitioned to a more westernized lifestyles, higher consumption of meat was  
14 264 associated with a higher risk of these types of cancer, whereas consumptions of vegetables  
15 265 had a strong protective effect against pancreatic cancer, and moderate consumption of coffee  
16 266 appeared to be beneficial against lung cancer [45,46]. Further studies on potential risk factors  
17 267 are required.

18 268  
19  
20 269 Short-stay immigrants had more fluctuating and non-stationary but inconspicuous period  
21 270 effects before 2021 than locals and long-stay immigrants. Cumulatively, an arch pattern and  
22 271 fluctuating curve depicting period effects externally resulted in an arch pattern of age-  
23 272 standardized mortality rates for short-stay immigrant women and irregular rates for short-stay  
24 273 immigrant men before 2021. The external performance of different period effects on mortality  
25 274 rates could be most likely attributed to the higher effect of different lifestyles and social  
26 275 development on new immigrants than on long-stay immigrants and locals in Hong Kong.  
27 276 With respect to the age-standardized mortality rates and projections, consistent with previous  
28 277 findings [47,48], we predict that the mortality rates of cancer in Hong Kong after 2021 will  
29 278 continue to decline or remain relatively stable, consistent with the trends before 2020, except  
30 279 for male immigrants who have stayed in Hong Kong for  $\leq 10$  years with colon cancer and  
31 280 male immigrants who have stayed in Hong Kong for  $> 10$  years with pancreatic cancer. Men  
32 281 will be at higher risk of mortality rates of cancer than women, regardless of immigration  
33 282 status. They are also compatible with the results in [4] that males suffer from higher risk of  
34 283 these types of cancer except for prostate cancer than females. Furthermore, new immigrant  
35 284 women will be at lower risk than local women, even though long-stay immigrants will suffer  
36 285 from higher mortality rates than locals in the future. Potential interpretations could be  
37 286 consistent with those for birth cohort effects, as age and period effect are considered as  
38 287 confounders of cohort effect.

39 288  
40  
41 289 In the past few decades, spurred by an increasing burden of high incidence and mortality rates  
42 290 of cancer, several studies focused on the inherent identification dilemma of three effects in the  
43 291 APC model. Further, complicated population distribution and immigration status in Hong



1  
2  
3  
4 292 Kong, one of the areas with the highest population density and migration frequency in the  
5 293 world, have intricate causes and inherent dynamics of cancer and other diseases. To our  
6 294 knowledge, few studies have assessed the relationship between immigration status and cancer  
7 mortality. Therefore, this study is original to examine the effect of the length of stay in Hong  
8 295 Kong and origins of previous residence on cancer deaths, which is instructive for further  
9 296 immigration policy making and targeted strategies of disease detection and intervention.  
10 297 However, this study had several limitations. Given the non-identifiability problem in age-  
11 298 period-cohort models, we could only depict trends and variations among different  
12 299 immigration and sex groups, as illustrated in figures, and insufficiently perform the estimates  
13 300 of the contributions of three effects or subgroups to mortality rates. Furthermore, we adopted  
14 301 cubic smoothing spline to estimate populations of immigrants and locals due to the large  
15 302 proportion of unspecified immigration status from official demographic projections.  
16 303  
17 304  
18 305

## 306 **Conclusion**

307 We conclude that immigrants, especially short-stay immigrants, had more pronounced  
308 fluctuations and sharper slopes of age, cohort, and period effects than locals. Men will be at a  
309 higher risk of mortality rates of six types of cancer than women in the future. Male  
310 immigrants who have stayed in Hong Kong for  $\leq 10$  years with colon cancer and male  
311 immigrants who have stayed in Hong Kong for  $> 10$  years with pancreatic cancer would  
312 perform significant uptrend in the future, while other immigration groups for each type of  
313 cancer would continue to decline or remain relatively stable. The predictive means of long-  
314 stay immigrants for each type of cancer would be greater than locals.  
315

1  
2  
3  
4 316 **Declaration**

5  
6 317 **Ethical approval and consent to participate**

7  
8 318 Ethical approval and consent to participate are not applicable. This study does not involve  
9  
10 319 human participants. Data was obtained from the Census and Statistics Department of Hong  
11  
12 320 Kong.

13  
14 321 **Consent for publication**

15  
16 322 Not applicable.

17  
18  
19 323 **Availability of data and materials**

20  
21 324 Data of population in Hong Kong was retrieved from Census and Statistics Department. Codes  
22  
23 325 for APC and BAPC analysis are available in the GitHub repository  
24  
25 326 <https://github.com/kshz2164313/APC-population-projections-for-immigration-HK>

26  
27 327 **Author contributions**

28  
29 328 **Yanji Zhao:** Methodology, Formal analysis, Data Curation, Writing - Original Draft,  
30 329 Visualization

31  
32 330 **Zian Zhuang:** Methodology, Formal analysis, Data Curation, Writing - Review & Editing

33  
34 331 **Lin Yang:** Validation, Writing - Review & Editing

35  
36 332 **Daihai He:** Conceptualization, Writing - Review & Editing, Supervision

37  
38 333

39  
40 334 **Funding**

41  
42 335 The work described in this paper was partially supported by a grant from the Research Grants  
43  
44 336 Council of the Hong Kong Special Administrative Region, China (HKU C7123-20G).

45  
46 337 **Conflict of interest**

47  
48 338 None declared.

49  
50 339 **Acknowledgements**

51  
52 340 None.

53  
54 341

## 343 References

- 344
- 345 1. Fan S-C. The population projection of Hong Kong. *Southeast Asian Journal of Social Science*.  
346 1974;2(1/2):105-17.
- 347 2. Department CaS. Hong Kong Statistics 1947-1967 (Report).  
348 [https://www.statistics.gov.hk/pub/hist/1961\\_1970/B10100031967AN67E0100.pdf](https://www.statistics.gov.hk/pub/hist/1961_1970/B10100031967AN67E0100.pdf),  
349 Accessed 4th May 2019.
- 350 3. Department CaS. Demographic Trends in Hong Kong 1981-2011 (Report).  
351 <http://www.statistics.gov.hk/pub/B1120017032012XXXXB0100.pdf>, Accessed 4th May 2019.
- 352 4. Sung H, Ferlay J, Siegel RL, Laversanne M, Soerjomataram I, Jemal A, et al. Global Cancer  
353 Statistics 2020: GLOBOCAN Estimates of Incidence and Mortality Worldwide for 36 Cancers  
354 in 185 Countries. *CA: A Cancer Journal for Clinicians*. 2021 2021/05/01;71(3):209-49. doi:  
355 <https://doi.org/10.3322/caac.21660>.
- 356 5. Wang XR, Chiu YL, Qiu H, Au JSK, Yu ITS. The roles of smoking and cooking emissions  
357 in lung cancer risk among Chinese women in Hong Kong. *Annals of Oncology*. 2009  
358 2009/04/01;20(4):746-51. doi: <https://doi.org/10.1093/annonc/mdn699>.
- 359 6. Chiu Y-L, Wang X-R, Qiu H, Yu IT-S. Risk factors for lung cancer: a case-control study in  
360 Hong Kong women. *Cancer Causes & Control*. 2010 2010/05/01;21(5):777-85. doi:  
361 10.1007/s10552-010-9506-9.
- 362 7. Office on S, Health. Publications and Reports of the Surgeon General. Women and  
363 Smoking: A Report of the Surgeon General. Atlanta (GA): Centers for Disease Control and  
364 Prevention (US); 2001.
- 365 8. Escobedo LG, Peddicord JP. Smoking prevalence in US birth cohorts: the influence of gender  
366 and education. *American Journal of Public Health*. 1996 1996/02/01;86(2):231-6. doi:  
367 10.2105/AJPH.86.2.231.
- 368 9. Husten CG, Shelton DM, Chrismon JH, Lin YC, Mowery P, Powell FA. Cigarette smoking  
369 and smoking cessation among older adults: United States, 1965-94. *Tobacco Control*.  
370 1997;6(3):175. doi: 10.1136/tc.6.3.175.
- 371 10. Bolego C, Poli A, Paoletti R. Smoking and gender. *Cardiovascular Research*.  
372 2002;53(3):568-76. doi: 10.1016/S0008-6363(01)00520-X.
- 373 11. Doll R, Hill AB. The mortality of doctors in relation to their smoking habits; a preliminary  
374 report. *Br Med J*. 1954;1(4877):1451-5. PMID: 13160495. doi: 10.1136/bmj.1.4877.1451.
- 375 12. Ramada Rodilla JM, Calvo Cerrada B, Serra Pujadas C, Delclos GL, Benavides FG. Fiber  
376 burden and asbestos-related diseases: an umbrella review. *Gaceta Sanitaria*. 2021 2021/06/11/.  
377 doi: <https://doi.org/10.1016/j.gaceta.2021.04.001>.
- 378 13. Collishaw NE, Kirkbride J, Wigle DT. Tobacco smoke in the workplace: an occupational  
379 health hazard. *Can Med Assoc J*. 1984;131(10):1199-204. PMID: 6498670.
- 380 14. Dresler CM, Fratelli C, Babb J, Everley L, Evans AA, Clapper ML. Gender differences in  
381 genetic susceptibility for lung cancer. *Lung Cancer*. 2000 2000/12/01;30(3):153-60. doi:  
382 [https://doi.org/10.1016/S0169-5002\(00\)00163-X](https://doi.org/10.1016/S0169-5002(00)00163-X).
- 383 15. Alexandrov K, Cascorbi I, Rojas M, Bouvier G, Kriek E, Bartsch H. CYP1A1 and GSTM1  
384 genotypes affect benzo[ a ]pyrene DNA adducts in smokers' lung: comparison with  
385 aromatic/hydrophobic adduct formation. *Carcinogenesis*. 2002;23(12):1969-77. doi:

- 1  
2  
3 386 10.1093/carcin/23.12.1969.
- 4 387 16. Samet JM. Radon and Lung Cancer. JNCI: Journal of the National Cancer Institute.  
5 388 1989;81(10):745-58. doi: 10.1093/jnci/81.10.745.
- 6 389 17. Darby S, Hill D, Auvinen A, Barros-Dios JM, Baysson H, Bochicchio F, et al. Radon in  
7 390 homes and risk of lung cancer: collaborative analysis of individual data from 13 European case-  
8 391 control studies. BMJ. 2005;330(7485):223. doi: 10.1136/bmj.38308.477650.63.
- 9 392 18. Raaschou-Nielsen O, Andersen ZJ, Beelen R, Samoli E, Stafoggia M, Weinmayr G, et al.  
10 393 Air pollution and lung cancer incidence in 17 European cohorts: prospective analyses from the  
11 394 European Study of Cohorts for Air Pollution Effects (ESCAPE). The Lancet Oncology. 2013  
12 395 2013/08/01/;14(9):813-22. doi: [https://doi.org/10.1016/S1470-2045\(13\)70279-1](https://doi.org/10.1016/S1470-2045(13)70279-1).
- 13 396 19. Abubakar II, Tillmann T, Banerjee A. Global, regional, and national age-sex specific all-  
14 397 cause and cause-specific mortality for 240 causes of death, 1990-2013: a systematic analysis  
15 398 for the Global Burden of Disease Study 2013. Lancet. 2015 Jan 10;385(9963):117-71.
- 16 399 20. Wild C. World cancer report 2014. Wild CP, Stewart BW, editors. Geneva, Switzerland:  
17 400 World Health Organization; 2014.
- 18 401 21. *2018 Summary-20190719*. Retrieved August 26, 2022, from  
19 402 [https://www.who.int/docs/default-source/wpro---documents/countries/china/2018-gats-china-](https://www.who.int/docs/default-source/wpro---documents/countries/china/2018-gats-china-factsheet-cn-en.pdf?sfvrsn=3f4e2da9_2)  
20 403 [factsheet-cn-en.pdf?sfvrsn=3f4e2da9\\_2](https://www.who.int/docs/default-source/wpro---documents/countries/china/2018-gats-china-factsheet-cn-en.pdf?sfvrsn=3f4e2da9_2)
- 21 404 22. *Thematic household survey*. Retrieved August 26, 2022, from  
22 405 [https://www.censtatd.gov.hk/en/data/stat\\_report/product/B1130201/att/B11302702020XXXX](https://www.censtatd.gov.hk/en/data/stat_report/product/B1130201/att/B11302702020XXXX)  
23 406 [B0100.pdf](https://www.censtatd.gov.hk/en/data/stat_report/product/B1130201/att/B11302702020XXXX)
- 24 407 23. Estimated alcohol consumption per capita in Hong Kong. Change4Health. (n.d.).  
25 408 Retrieved December 1, 2022, from  
26 409 [https://www.change4health.gov.hk/en/alcohol\\_aware/figures/alcohol\\_consumption/index.htm](https://www.change4health.gov.hk/en/alcohol_aware/figures/alcohol_consumption/index.html)  
27 410 [l](https://www.change4health.gov.hk/en/alcohol_aware/figures/alcohol_consumption/index.html)
- 28 411 24. World Health Organization. Global status report on alcohol and health 2018. World  
29 412 Health Organization; 2019 Feb 14.
- 30 413 25. Zhao S, Dong H, Qin J, Liu H, Li Y, Chen Y, et al. Breast cancer mortality in Chinese  
31 414 women: does migrant status play a role? Annals of Epidemiology. 2019 2019/12/01/;40:28-  
32 415 34.e2. doi: <https://doi.org/10.1016/j.annepidem.2019.10.006>.
- 33 416 26. Gomez SL, Yang J, Lin S-W, McCusker M, Sandler A, Cheng I, et al. Incidence trends of  
34 417 lung cancer by immigration status among Chinese Americans. Cancer Epidemiol Biomarkers  
35 418 Prev. 2015;24(8):1157-64. PMID: 25990553. doi: 10.1158/1055-9965.EPI-15-0123.
- 36 419 27. Hemminki K, Li X, Czene K. Cancer risks in first-generation immigrants to Sweden.  
37 420 International Journal of Cancer. 2002 2002/05/10;99(2):218-28. doi:  
38 421 <https://doi.org/10.1002/ijc.10322>.
- 39 422 28. Vanthomme K, Roskamp M, De Schutter H, Vandenneede H. Lung cancer incidence  
40 423 differences in migrant men in Belgium, 2004–2013: histology-specific analyses. BMC Cancer.  
41 424 2021 2021/03/30;21(1):328. doi: 10.1186/s12885-021-08038-6.
- 42 425 29. Schooling M, Leung GM, Janus ED, Ho SY, Hedley AJ, Lam TH. Childhood migration  
43 426 and cardiovascular risk. International Journal of Epidemiology. 2004;33(6):1219-26. doi:  
44 427 10.1093/ije/dyh221.
- 45 428 30. Leung JYY, Li AM, Leung GM, Schooling CM. Mode of delivery and childhood  
46 429 hospitalizations for asthma and other wheezing disorders. Clinical & Experimental Allergy.

- 1  
2  
3 430 2015 2015/06/01;45(6):1109-17. doi: <https://doi.org/10.1111/cea.12548>.
- 4 431 31. Baker A, Bray I. Bayesian projections: what are the effects of excluding data from younger  
5 432 age groups?. *American Journal of Epidemiology*. 2005 Oct 15;162(8):798-805.
- 6 433 32. Rosenberg PS, Anderson WF. Age-Period-Cohort Models in Cancer Surveillance Research:  
7 434 Ready for Prime Time? APC Models. *Cancer Epidemiology, Biomarkers & Prevention*. 2011  
8 435 Jul 1;20(7):1263-8.
- 9 436 33. Holford T. Analyzing the effects of age, period and cohort on incidence and mortality rates.  
10 437 *Stat Meth Med Res*. 1992;1:317-37.
- 11 438 34. Brookmeyer R, Stroup DF, editors. *Monitoring the health of populations: statistical*  
12 439 *principles and methods for public health surveillance*. Oxford University Press; 2004.
- 13 440 35. Riebler A, Held L. Projecting the future burden of cancer: Bayesian age–period–cohort  
14 441 analysis with integrated nested Laplace approximations. *Biometrical Journal*. 2017  
15 442 May;59(3):531-49.
- 16 443 36. Knoll M, Furkel J, Debus J, Abdollahi A, Karch A, Stock C. An R package for an integrated  
17 444 evaluation of statistical approaches to cancer incidence projection. *BMC medical research*  
18 445 *methodology*. 2020 Dec;20(1):1-1.
- 19 446 37. Ahmad OB, Boschi-Pinto C, Lopez AD, Murray CJ, Lozano R, Inoue M. Age  
20 447 standardization of rates: a new WHO standard. Geneva: World Health Organization. 2001  
21 448 Jan;9(10):1-4.
- 22 449 38. Sung H, Ferlay J, Siegel RL, Laversanne M, Soerjomataram I, Jemal A, Bray F. Global  
23 450 cancer statistics 2020: GLOBOCAN estimates of incidence and mortality worldwide for 36  
24 451 cancers in 185 countries. *CA: a cancer journal for clinicians*. 2021 May;71(3):209-49.
- 25 452 39. Mousavi SM, Fallah M, Sundquist K, Hemminki K. Age-and time-dependent changes in  
26 453 cancer incidence among immigrants to Sweden: colorectal, lung, breast and prostate cancers.  
27 454 *International journal of cancer*. 2012 Jul 15;131(2):E122-8.
- 28 455 40. National Cancer Institute. SEER stat fact sheets: liver and intrahepatic bile duct cancer.
- 29 456 41. Wu X, Chung VC, Hui EP, Ziea ET, Ng BF, Ho RS, Tsoi KK, Wong S, Wu JC.  
30 457 Effectiveness of acupuncture and related therapies for palliative care of cancer: overview of  
31 458 systematic reviews. *Scientific reports*. 2015 Nov 26;5(1):1-5.
- 32 459 42. Sung H, Rosenberg PS, Chen WQ, Hartman M, Lim WY, Chia KS, Wai-Kong Mang O,  
33 460 Tse L, Anderson WF, Yang XR. The impact of breast cancer-specific birth cohort effects among  
34 461 younger and older Chinese populations. *International journal of cancer*. 2016 Aug  
35 462 1;139(3):527-34.
- 36 463 43. *The world economy volume 1: a millennial perspective, 2, Historical statistics*: Academic  
37 464 *Foundation, Gurgaon, India (2007)*
- 38 465 44. Elias SG, Peeters PH, Grobbee DE, van Noord PA. The 1944-1945 Dutch famine and  
39 466 subsequent overall cancer incidence. *Cancer Epidemiology Biomarkers & Prevention*. 2005  
40 467 Aug;14(8):1981-5.
- 41 468 45. Chiu YL, Wang XR, Qiu H, Yu IT. Risk factors for lung cancer: a case–control study in  
42 469 Hong Kong women. *Cancer Causes & Control*. 2010 May;21(5):777-85.
- 43 470 46. Li J, Lam AS, Yau ST, Yiu KK, Tsoi KK. Antihypertensive treatments and risks of lung  
44 471 Cancer: A large population-based cohort study in Hong Kong. *BMC cancer*. 2021 Dec;21(1):1-  
45 472 9.
- 46 473 47. Du J, Sun H, Sun Y, Du J, Cao W, Sun S. Assessment of age, period, and cohort effects of

1  
2  
3 474 lung cancer incidence in Hong Kong and projection up to 2030 based on changing  
4 475 demographics. *American Journal of Cancer Research*. 2021;11(12):5902.  
5  
6 476 48. *Centre for Health Protection, Department of Health - Lung Cancer*. Centre for Health  
7 477 Protection. Retrieved August 10, 2022, from  
8 478 <https://www.chp.gov.hk/en/healthtopics/content/25/49.html>  
9  
10  
11  
12  
13  
14  
15  
16  
17  
18  
19  
20  
21  
22  
23  
24  
25  
26  
27  
28  
29  
30  
31  
32  
33  
34  
35  
36  
37  
38  
39  
40  
41  
42  
43  
44  
45  
46  
47  
48  
49  
50  
51  
52  
53  
54  
55  
56  
57  
58  
59  
60

For peer review only

1  
2  
3 479

4 480 **Figure 1.** Parameter estimates of age, period and cohort effects based on an age-period-cohort model of males' (a)  
5 481 and females' (b) lung cancer mortality rates and projections from 2022 to 2030 (c) by immigrant groups: locals,  
6 482 immigrants stay in Hong Kong for more than 10 years and immigrants stay in Hong Kong for less than or equal to  
7 483 10 years. Age effect was assessed by mortality (left axis). Cohort and period effects were assessed by relative risk  
8 484 (right axis), 95% confidence intervals are shown as shaded bands. Observations in (c) are shown as dots with the  
9 485 predictive distribution between the 5% and 95% quantile, whereby each lighter shade of blue represents an  
10 486 additional 10% predictive CI. The predictive mean is shown as black solid line and the vertical dashed line  
11 487 indicates where prediction started.  
12 488

13  
14  
15  
16  
17  
18  
19  
20  
21  
22  
23  
24  
25  
26  
27  
28  
29  
30  
31  
32  
33  
34  
35  
36  
37  
38  
39  
40  
41  
42  
43  
44  
45  
46  
47  
48  
49  
50  
51  
52  
53  
54  
55  
56  
57  
58  
59  
60

For peer review only



489

| Predictive mean of age-standardized mortality rates of lung cancer per 100,000 population |                            |                            |                    |                          |                          |                  |
|-------------------------------------------------------------------------------------------|----------------------------|----------------------------|--------------------|--------------------------|--------------------------|------------------|
| Year                                                                                      | Female immigrants >10 (SD) | Female immigrants ≤10 (SD) | Female locals (SD) | Male immigrants >10 (SD) | Male immigrants ≤10 (SD) | Male locals (SD) |
| 2022                                                                                      | 41.33(1.86)                | 22.21(4.67)                | 30.21(3.54)        | 100.18(4.18)             | 79.89(10.40)             | 52.26(4.85)      |
| 2023                                                                                      | 40.58(2.26)                | 20.55(5.37)                | 30.63(4.77)        | 97.17(5.33)              | 79.81(11.82)             | 50.82(5.38)      |
| 2024                                                                                      | 39.86(2.74)                | 19.01(6.10)                | 31.05(6.38)        | 94.33(6.71)              | 79.72(13.42)             | 49.56(6.12)      |
| 2025                                                                                      | 39.18(3.28)                | 17.57(6.80)                | 31.47(8.29)        | 91.69(8.24)              | 79.62(15.18)             | 48.17(6.96)      |
| 2026                                                                                      | 38.52(3.85)                | 16.23(7.45)                | 31.89(10.46)       | 89.14(9.83)              | 79.49(17.08)             | 46.64(7.83)      |
| 2027                                                                                      | 37.88(4.46)                | 15.00(8.04)                | 32.31(12.86)       | 86.65(11.46)             | 79.32(19.09)             | 45.12(8.75)      |
| 2028                                                                                      | 37.26(5.09)                | 13.85(8.56)                | 32.73(15.48)       | 84.18(13.10)             | 79.08(21.17)             | 43.82(9.75)      |
| 2029                                                                                      | 36.64(5.73)                | 12.79(9.01)                | 33.14(18.30)       | 81.80(14.73)             | 78.77(23.32)             | 42.66(10.79)     |
| 2030                                                                                      | 36.04(6.39)                | 11.80(9.39)                | 33.55(21.32)       | 79.55(16.37)             | 78.40(25.52)             | 41.43(11.79)     |

490 **Table 1.** Predictive means and standard deviations of age-standardized mortality rates of lung  
 491 cancer per 100,000 population for each gender and immigrant status from 2022 to 2030.  
 492



| Predictive mean of age-standardized morality rates of pancreatic cancer per 100,000 population |                            |                            |                    |                          |                          |                  |
|------------------------------------------------------------------------------------------------|----------------------------|----------------------------|--------------------|--------------------------|--------------------------|------------------|
| Year                                                                                           | Female immigrants >10 (SD) | Female immigrants ≤10 (SD) | Female locals (SD) | Male immigrants >10 (SD) | Male immigrants ≤10 (SD) | Male locals (SD) |
| 2022                                                                                           | 11.11(0.74)                | 5.437(1.55)                | 9.011(1.22)        | 17.87(1.18)              | 7.874(2.37)              | 12.28(1.48)      |
| 2023                                                                                           | 11.35(0.90)                | 5.436(1.69)                | 9.150(1.33)        | 18.48(1.49)              | 7.760(2.53)              | 12.48(1.64)      |
| 2024                                                                                           | 11.61(1.09)                | 5.430(1.83)                | 9.289(1.47)        | 19.11(1.87)              | 7.639(2.70)              | 12.69(1.83)      |
| 2025                                                                                           | 11.87(1.31)                | 5.420(1.99)                | 9.429(1.64)        | 19.77(2.31)              | 7.511(2.87)              | 12.89(2.06)      |
| 2026                                                                                           | 12.14(1.56)                | 5.405(2.15)                | 9.569(1.83)        | 20.46(2.83)              | 7.376(3.05)              | 13.11(2.32)      |
| 2027                                                                                           | 12.42(1.83)                | 5.386(2.31)                | 9.710(2.04)        | 21.18(3.41)              | 7.237(3.22)              | 13.32(2.63)      |
| 2028                                                                                           | 12.70(2.14)                | 5.363(2.48)                | 9.851(2.28)        | 21.92(4.07)              | 7.094(3.40)              | 13.55(2.96)      |
| 2029                                                                                           | 12.99(2.48)                | 5.337(2.66)                | 9.994(2.54)        | 22.69(4.79)              | 6.946(3.57)              | 13.78(3.33)      |
| 2030                                                                                           | 13.29(2.84)                | 5.307(2.84)                | 10.13(2.82)        | 23.49(5.60)              | 6.796(3.75)              | 14.02(3.74)      |

493 **Table 2.** Predictive means and standard deviations of age-standardized morality rates of  
 494 pancreatic cancer per 100,000 population for each gender and immigrant status from 2022 to  
 495 2030.

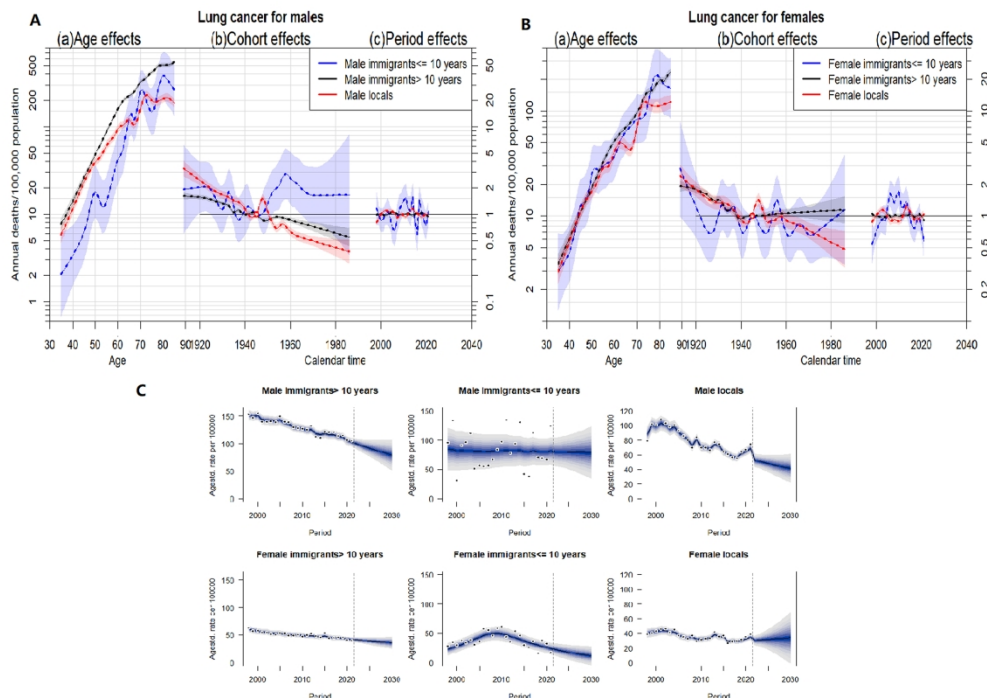

Figure 1. Parameter estimates of age, period and cohort effects based on an age-period-cohort model of males' (a) and females' (b) lung cancer mortality rates and projections from 2022 to 2030 (c) by immigrant groups: locals, immigrants stay in Hong Kong for more than 10 years and immigrants stay in Hong Kong for less than or equal to 10 years. Age effect was assessed by mortality (left axis). Cohort and period effects were assessed by relative risk (right axis), 95% confidence intervals are shown as shaded bands. Observations in (c) are shown as dots with the predictive distribution between the 5% and 95% quantile, whereby each lighter shade of blue represents an additional 10% predictive CI. The predictive mean is shown as black solid line and the vertical dashed line indicates where prediction started.

473x345mm (300 x 300 DPI)

1  
2  
3  
4  
5  
6  
7  
8  
9  
10  
11  
12  
13  
14  
15  
16  
17  
18  
19  
20  
21  
22  
23  
24  
25  
26  
27  
28  
29  
30  
31  
32  
33  
34  
35  
36  
37  
38  
39  
40  
41  
42  
43  
44  
45  
46

**Predictive mean of age-standardized morality rates of colon cancer per 100,000 population**

| Year | Female immigrants >10 (SD) | Female immigrants ≤10 (SD) | Female locals (SD) | Male immigrants >10 (SD) | Male immigrants ≤10 (SD) | Male locals (SD) |
|------|----------------------------|----------------------------|--------------------|--------------------------|--------------------------|------------------|
| 2022 | 18.95(1.12)                | 7.704(2.50)                | 13.46(1.59)        | 29.81(1.45)              | 16.77(3.76)              | 19.80(2.07)      |
| 2023 | 18.76(1.36)                | 7.248(2.81)                | 13.23(1.71)        | 29.65(1.79)              | 17.00(4.17)              | 19.38(2.21)      |
| 2024 | 18.58(1.65)                | 6.819(3.10)                | 13.00(1.86)        | 29.51(2.18)              | 17.22(4.64)              | 18.97(2.39)      |
| 2025 | 18.42(1.97)                | 6.415(3.37)                | 12.76(2.04)        | 29.39(2.62)              | 17.45(5.14)              | 18.57(2.61)      |
| 2026 | 18.26(2.33)                | 6.034(3.61)                | 12.53(2.24)        | 29.30(3.11)              | 17.66(5.68)              | 18.17(2.85)      |
| 2027 | 18.11(2.70)                | 5.674(3.82)                | 12.29(2.45)        | 29.21(3.63)              | 17.88(6.27)              | 17.79(3.11)      |
| 2028 | 17.98(3.10)                | 5.334(4.01)                | 12.05(2.68)        | 29.13(4.19)              | 18.09(6.89)              | 17.42(3.40)      |
| 2029 | 17.85(3.52)                | 5.013(4.17)                | 11.82(2.91)        | 29.05(4.77)              | 18.30(7.56)              | 17.06(3.69)      |
| 2030 | 17.72(3.96)                | 4.710(4.30)                | 11.58(3.16)        | 28.98(5.38)              | 18.50(8.25)              | 16.70(4.00)      |

**eTable 1.** Predictive means and standard deviations of age-standardized morality rates of colon cancer per 100,000 population for each gender and immigrant status from 2022 to 2030.

| <b>Predictive mean of age-standardized morality rates of liver cancer per 100,000 population</b> |                            |                            |                    |                          |                          |                  |
|--------------------------------------------------------------------------------------------------|----------------------------|----------------------------|--------------------|--------------------------|--------------------------|------------------|
| Year                                                                                             | Female immigrants >10 (SD) | Female immigrants ≤10 (SD) | Female locals (SD) | Male immigrants >10 (SD) | Male immigrants ≤10 (SD) | Male locals (SD) |
| 2022                                                                                             | 10.67(0.71)                | 8.65(1.81)                 | 6.36(0.87)         | 49.22(2.36)              | 39.02(6.48)              | 22.16(2.08)      |
| 2023                                                                                             | 10.09(0.85)                | 8.38(1.94)                 | 6.07(0.90)         | 47.76(2.93)              | 37.38(7.46)              | 21.01(2.21)      |
| 2024                                                                                             | 9.53(1.00)                 | 8.11(2.08)                 | 5.79(0.93)         | 46.35(3.59)              | 35.79(8.51)              | 19.91(2.38)      |
| 2025                                                                                             | 9.01(1.15)                 | 7.84(2.21)                 | 5.52(0.97)         | 44.99(4.30)              | 34.25(9.58)              | 18.85(2.58)      |
| 2026                                                                                             | 8.49(1.30)                 | 7.58(2.35)                 | 5.26(1.01)         | 43.66(5.04)              | 32.76(10.6)              | 17.83(2.78)      |
| 2027                                                                                             | 8.02(1.45)                 | 7.32(2.49)                 | 5.01(1.06)         | 42.36(5.80)              | 31.31(11.6)              | 16.85(2.99)      |
| 2028                                                                                             | 7.56(1.58)                 | 7.07(2.62)                 | 4.76(1.10)         | 41.10(6.56)              | 29.91(12.6)              | 15.91(3.20)      |
| 2029                                                                                             | 7.13(1.71)                 | 6.82(2.75)                 | 4.53(1.15)         | 39.88(7.32)              | 28.55(13.5)              | 15.02(3.40)      |
| 2030                                                                                             | 6.73(1.83)                 | 6.58(2.88)                 | 4.30(1.19)         | 38.70(8.08)              | 27.25(14.3)              | 14.17(3.58)      |

**eTable 2.** Predictive means and standard deviations of age-standardized morality rates of liver cancer per 100,000 population for each gender and immigrant status from 2022 to 2030.

1  
2  
3  
4  
5  
6  
7  
8  
9  
10  
11  
12  
13  
14  
15  
16  
17  
18  
19  
20  
21  
22  
23  
24  
25  
26  
27  
28  
29  
30  
31  
32  
33  
34  
35  
36  
37  
38  
39  
40  
41  
42  
43  
44  
45  
46

**Predictive mean of age-standardized morality rates of stomach cancer per 100,000 population**

| Year | Female immigrants >10 (SD) | Female immigrants ≤10 (SD) | Female locals (SD) | Male immigrants >10 (SD) | Male immigrants ≤10 (SD) | Male locals (SD) |
|------|----------------------------|----------------------------|--------------------|--------------------------|--------------------------|------------------|
| 2022 | 7.94(0.62)                 | 7.36(1.55)                 | 4.89(0.51)         | 13.89(0.96)              | 15.19(3.38)              | 8.06(0.99)       |
| 2023 | 7.70(0.73)                 | 7.32(1.69)                 | 4.75(0.56)         | 13.33(1.20)              | 15.06(3.66)              | 7.73(1.02)       |
| 2024 | 7.47(0.86)                 | 7.29(1.84)                 | 4.61(0.62)         | 12.80(1.45)              | 14.92(3.97)              | 7.41(1.07)       |
| 2025 | 7.24(1.00)                 | 7.28(2.01)                 | 4.47(0.69)         | 12.30(1.72)              | 14.78(4.30)              | 7.09(1.12)       |
| 2026 | 7.03(1.14)                 | 7.27(2.19)                 | 4.33(0.76)         | 11.83(1.99)              | 14.64(4.65)              | 6.79(1.19)       |
| 2027 | 6.82(1.29)                 | 7.27(2.39)                 | 4.20(0.83)         | 11.38(2.25)              | 14.49(5.01)              | 6.50(1.25)       |
| 2028 | 6.62(1.43)                 | 7.28(2.61)                 | 4.07(0.91)         | 10.95(2.51)              | 14.34(5.39)              | 6.23(1.32)       |
| 2029 | 6.42(1.57)                 | 7.30(2.84)                 | 3.95(0.98)         | 10.53(2.76)              | 14.18(5.77)              | 5.96(1.39)       |
| 2030 | 6.24(1.71)                 | 7.33(3.08)                 | 3.82(1.06)         | 10.14(3.00)              | 14.03(6.16)              | 5.71(1.46)       |

**eTable 3.** Predictive means and standard deviations of age-standardized morality rates of stomach cancer per 100,000 population for each gender and immigrant status from 2022 to 2030.

| Predictive mean of age-standardized morality rates of prostate cancer per 100,000 population |                          |                          |                  |
|----------------------------------------------------------------------------------------------|--------------------------|--------------------------|------------------|
| Year                                                                                         | Male immigrants >10 (SD) | Male immigrants ≤10 (SD) | Male locals (SD) |
| 2022                                                                                         | 14.58(0.79)              | 8.77(3.10)               | 9.65(1.56)       |
| 2023                                                                                         | 14.57(0.95)              | 8.58(3.29)               | 9.67(1.65)       |
| 2024                                                                                         | 14.55(1.14)              | 8.38(3.48)               | 9.69(1.76)       |
| 2025                                                                                         | 14.53(1.36)              | 8.19(3.68)               | 9.71(1.90)       |
| 2026                                                                                         | 14.51(1.60)              | 8.00(3.89)               | 9.74(2.05)       |
| 2027                                                                                         | 14.48(1.86)              | 7.81(4.09)               | 9.78(2.23)       |
| 2028                                                                                         | 14.45(2.13)              | 7.63(4.30)               | 9.81(2.43)       |
| 2029                                                                                         | 14.41(2.42)              | 7.44(4.51)               | 9.85(2.64)       |
| 2030                                                                                         | 14.37(2.71)              | 7.27(4.72)               | 9.89(2.87)       |

**eTable 4.** Predictive means and standard deviations of age-standardized morality rates of prostate cancer per 100,000 population for each gender and immigrant status from 2022 to 2030.

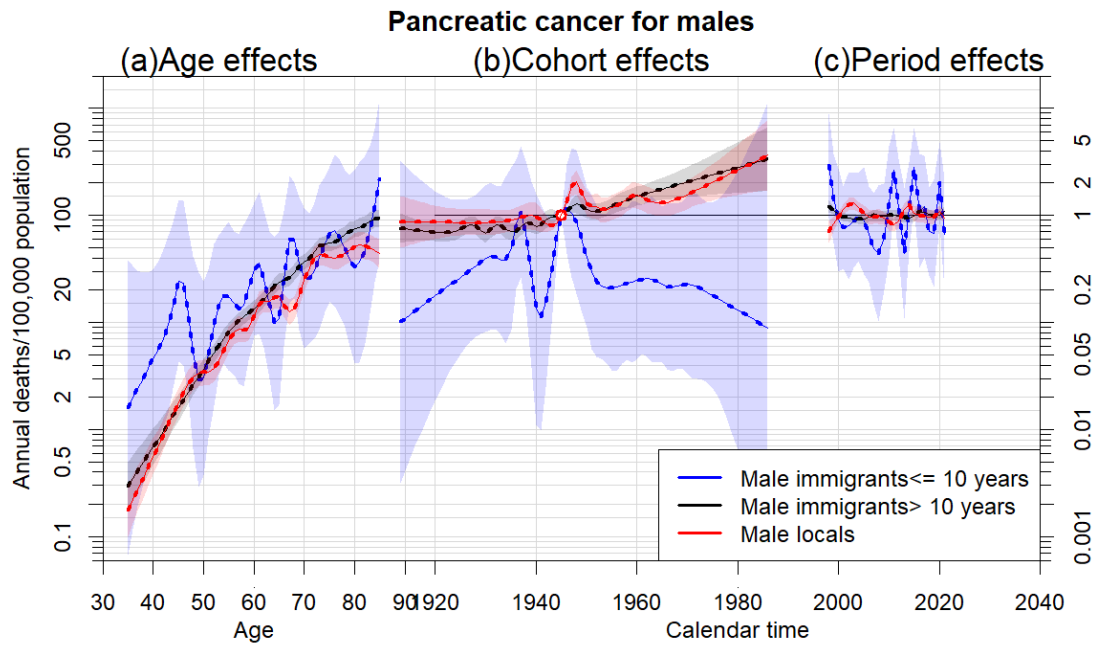

**eFigure 1(a).** Parameter estimates of age (a), period (b) and cohort (c) effects based on an age-period-cohort model of male pancreatic cancer mortality rates by immigrant groups: locals, immigrants stay in Hong Kong for more than 10 years and immigrants stay in Hong Kong for less than or equal to 10 years. Age effect was assessed by mortality (left axis). Cohort and period effects were assessed by relative risk (right axis), 95% confidence intervals are shown as shaded bands.

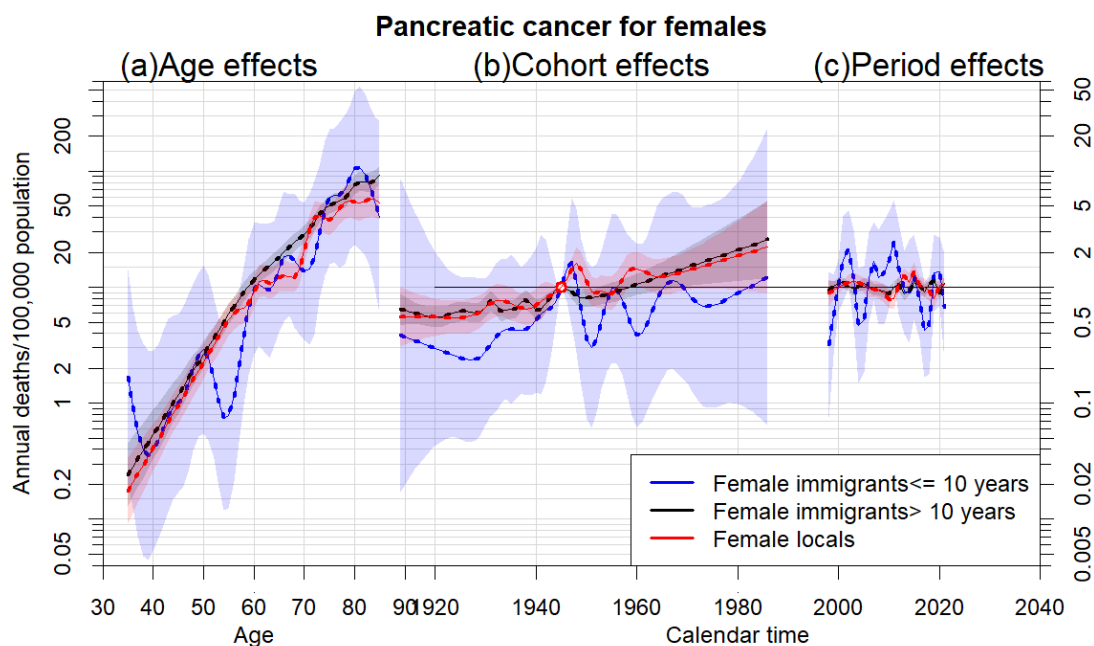

**eFigure 1(b).** Parameter estimates of age (a), period (b) and cohort (c) effects based on an age-period-cohort model of female pancreatic cancer mortality rates by immigrant groups: locals, immigrants stay in Hong Kong for more than 10 years and immigrants stay in Hong Kong for less than or equal to 10 years. Age effect was assessed by mortality (left axis). Cohort and period effects were assessed by relative risk (right axis), 95% confidence intervals are shown as shaded bands.



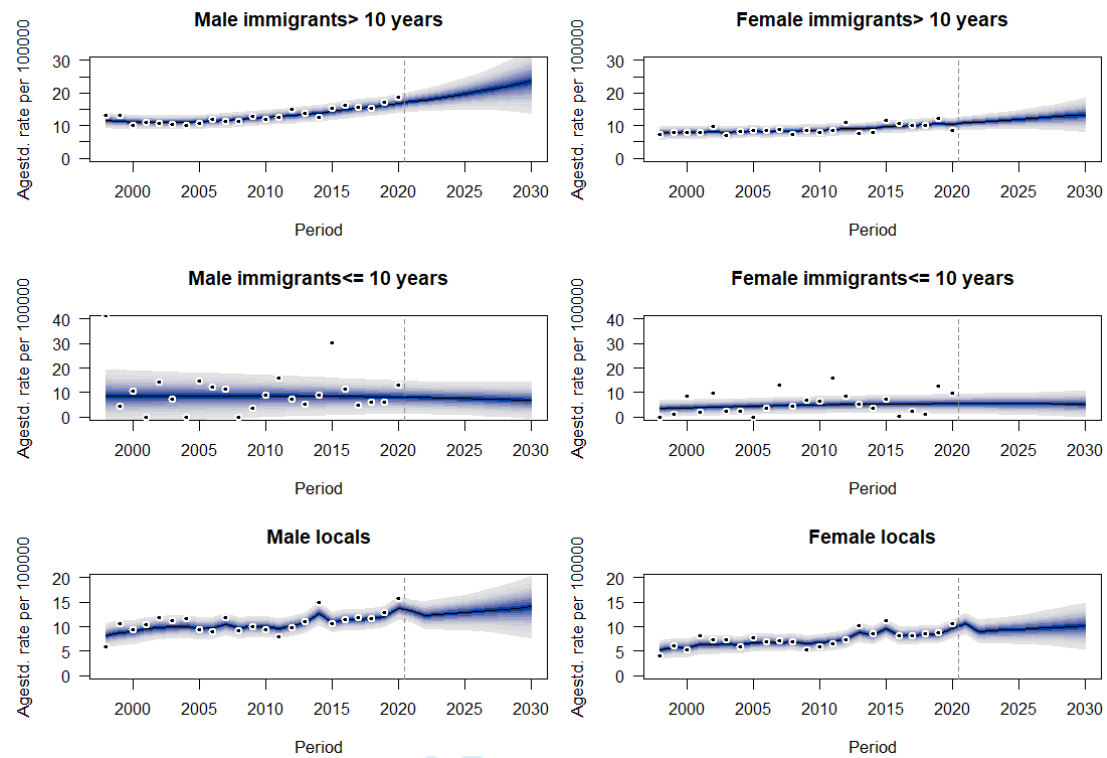

**eFigure 1(c).** Projections of pancreatic cancer mortality rates by gender and immigrant status from 2022 to 2030. Observations are shown as dots with the predictive distribution between the 5% and 95% quantile, whereby each lighter shade of blue represents an additional 10% predictive CI. The predictive mean is shown as black solid line and the vertical dashed line indicates where prediction started.

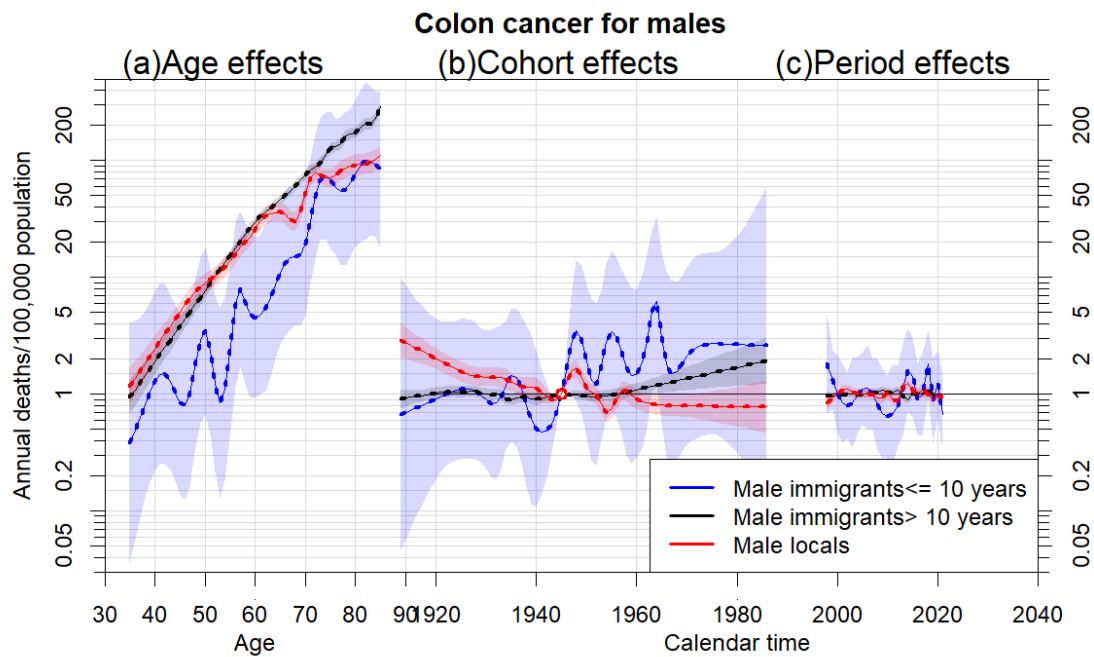

28 **eFigure 2(a).** Parameter estimates of age (a), period (b) and cohort (c) effects based on an  
29 age-period-cohort model of male colon cancer mortality rates by immigrant groups: locals,  
30 immigrants stay in Hong Kong for more than 10 years and immigrants stay in Hong Kong for  
31 less than or equal to 10 years. Age effect was assessed by mortality (left axis). Cohort and  
32 period effects were assessed by relative risk (right axis), 95% confidence intervals are shown  
33 as shaded bands.  
34  
35  
36  
37  
38  
39  
40  
41  
42  
43  
44  
45  
46  
47  
48  
49  
50  
51  
52  
53  
54  
55  
56  
57  
58  
59  
60

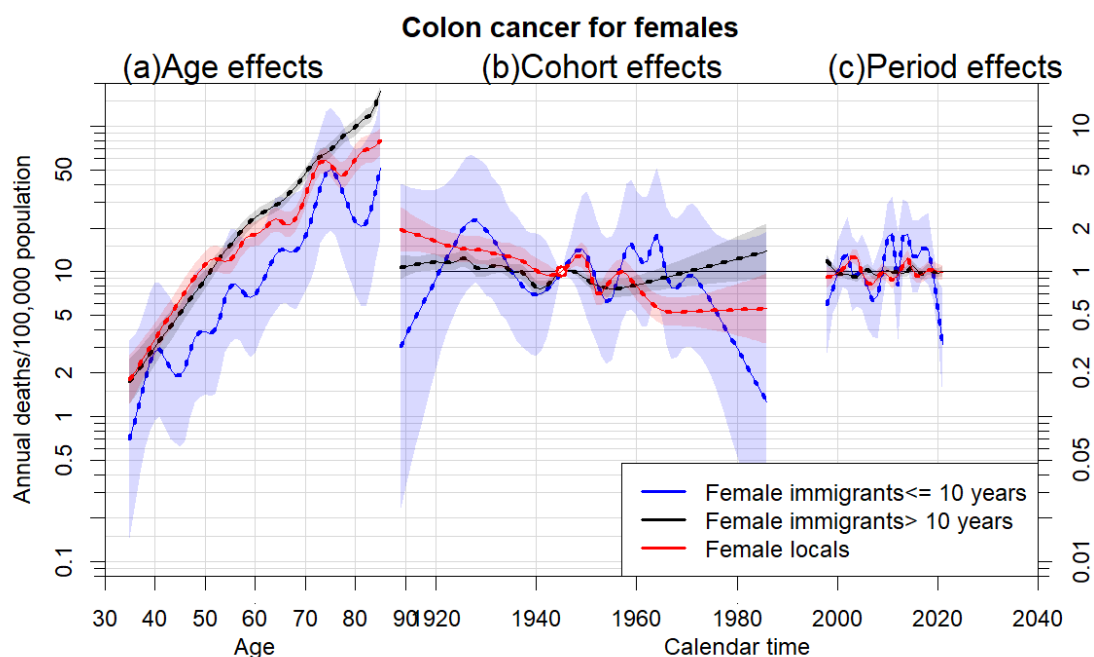

28  
29  
30  
31  
32  
33  
34  
35  
36  
37  
38  
39  
40  
41  
42  
43  
44  
45  
46  
47  
48  
49  
50  
51  
52  
53  
54  
55  
56  
57  
58  
59  
60

**Figure 2(b).** Parameter estimates of age (a), period (b) and cohort (c) effects based on an age-period-cohort model of female colon cancer mortality rates by immigrant groups: locals, immigrants stay in Hong Kong for more than 10 years and immigrants stay in Hong Kong for less than or equal to 10 years. Age effect was assessed by mortality (left axis). Cohort and period effects were assessed by relative risk (right axis), 95% confidence intervals are shown as shaded bands.

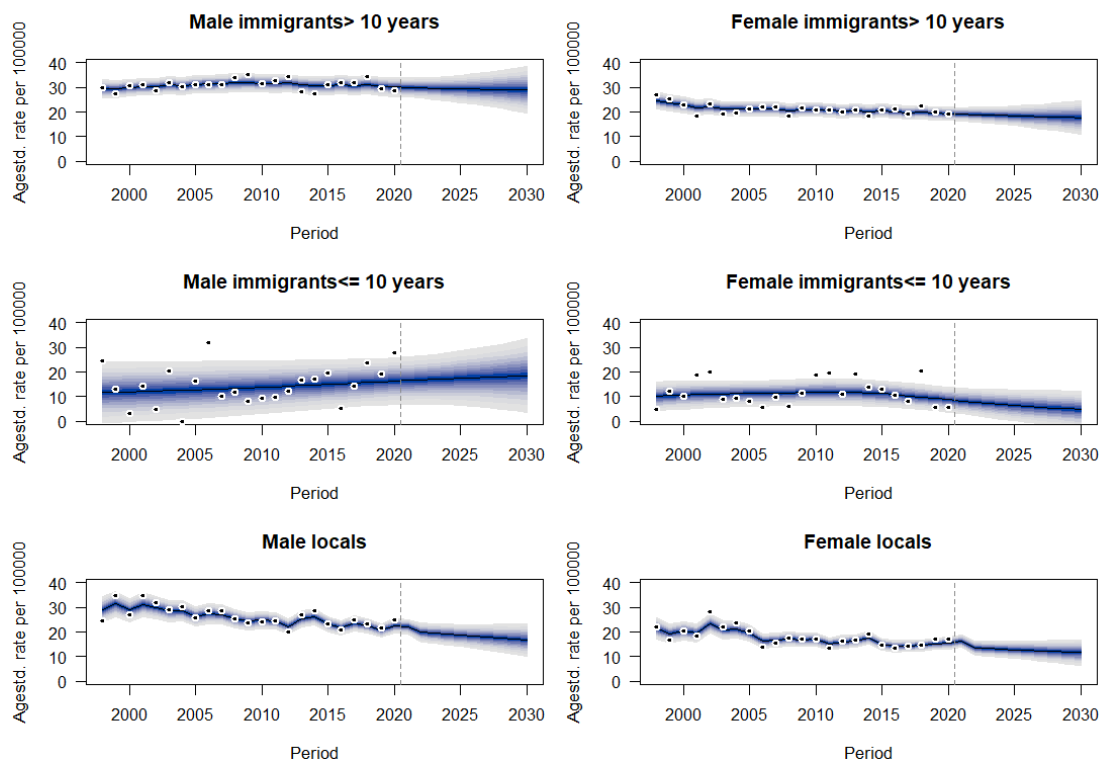

**eFigure 2(c).** Projections of colon cancer mortality rates by gender and immigrant status from 2022 to 2030. Observations are shown as dots with the predictive distribution between the 5% and 95% quantile, whereby each lighter shade of blue represents an additional 10% predictive CI. The predictive mean is shown as black solid line and the vertical dashed line indicates where prediction started.

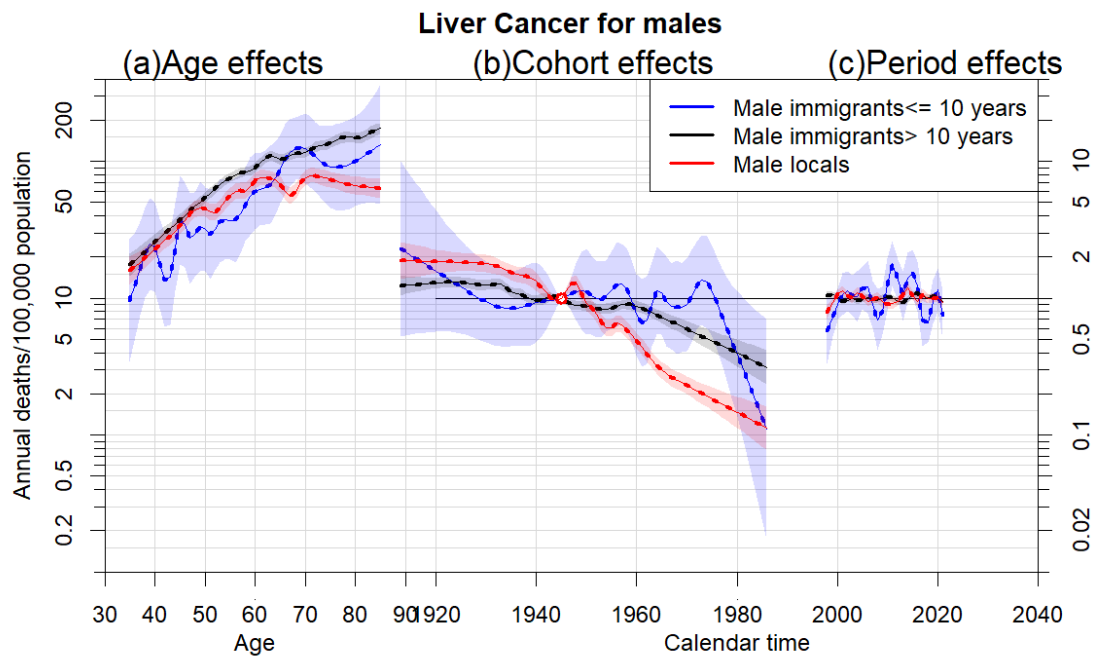

**eFigure 3(a).** Parameter estimates of age (a), period (b) and cohort (c) effects based on an age-period-cohort model of male liver cancer mortality rates by immigrant groups: locals, immigrants stay in Hong Kong for more than 10 years and immigrants stay in Hong Kong for less than or equal to 10 years. Age effect was assessed by mortality (left axis). Cohort and period effects were assessed by relative risk (right axis), 95% confidence intervals are shown as shaded bands.

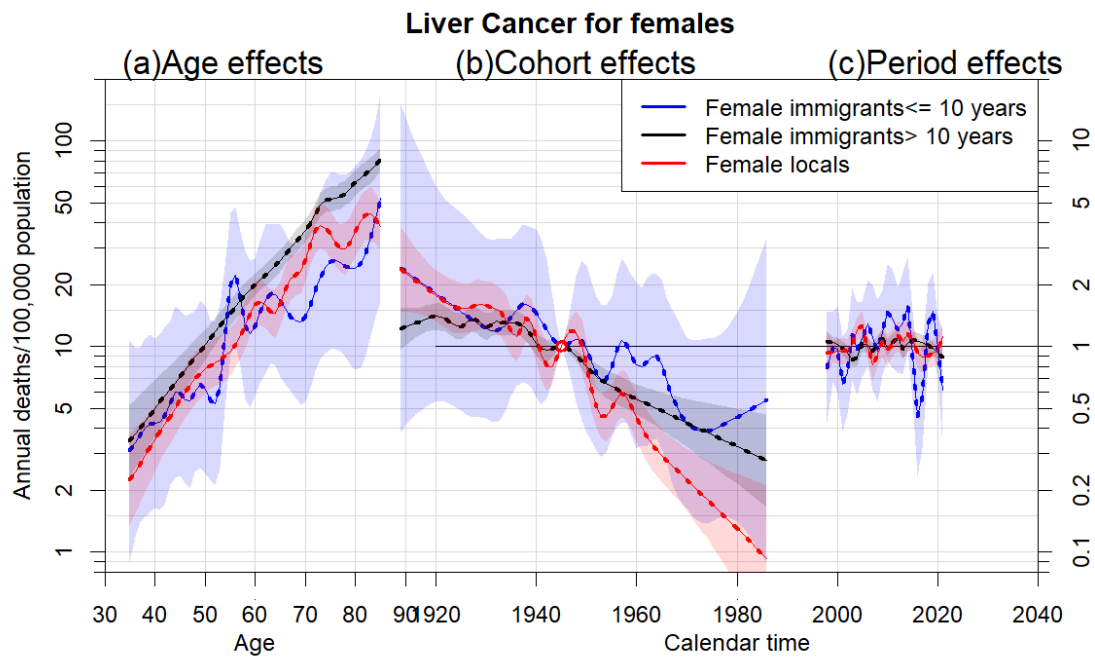

**eFigure 3(b).** Parameter estimates of age (a), period (b) and cohort (c) effects based on an age-period-cohort model of female liver cancer mortality rates by immigrant groups: locals, immigrants stay in Hong Kong for more than 10 years and immigrants stay in Hong Kong for less than or equal to 10 years. Age effect was assessed by mortality (left axis). Cohort and period effects were assessed by relative risk (right axis), 95% confidence intervals are shown as shaded bands.

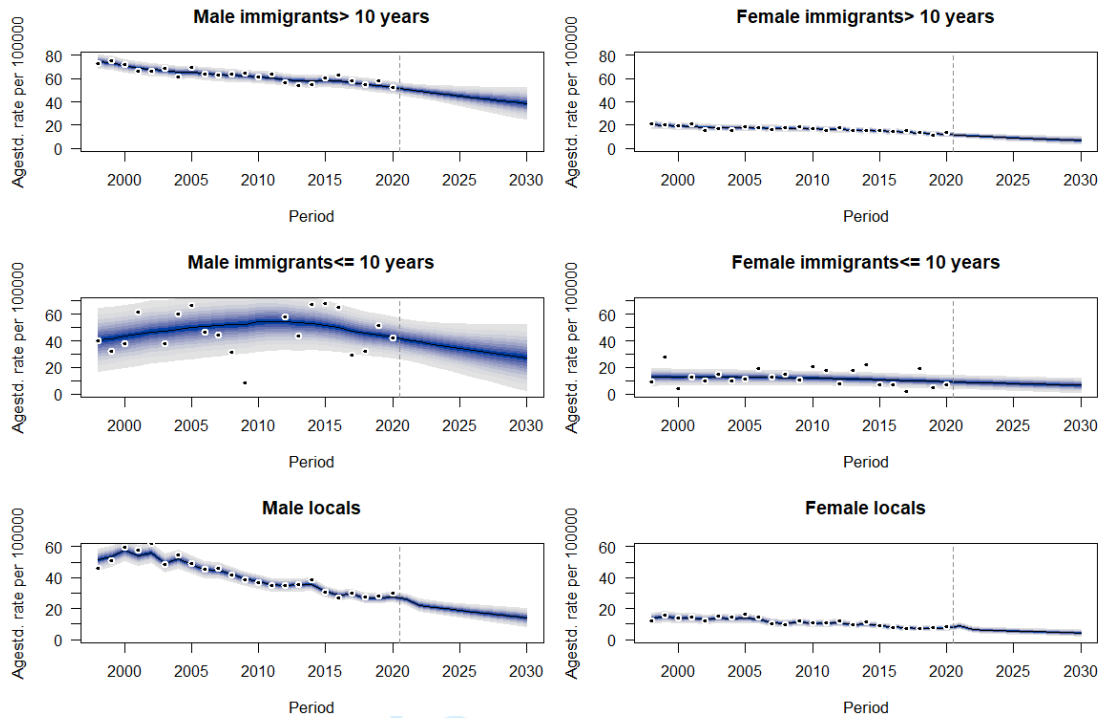

**eFigure 3(c).** Projections of liver cancer mortality rates by gender and immigrant status from 2022 to 2030. Observations are shown as dots with the predictive distribution between the 5% and 95% quantile, whereby each lighter shade of blue represents an additional 10% predictive CI. The predictive mean is shown as black solid line and the vertical dashed line indicates where prediction started.

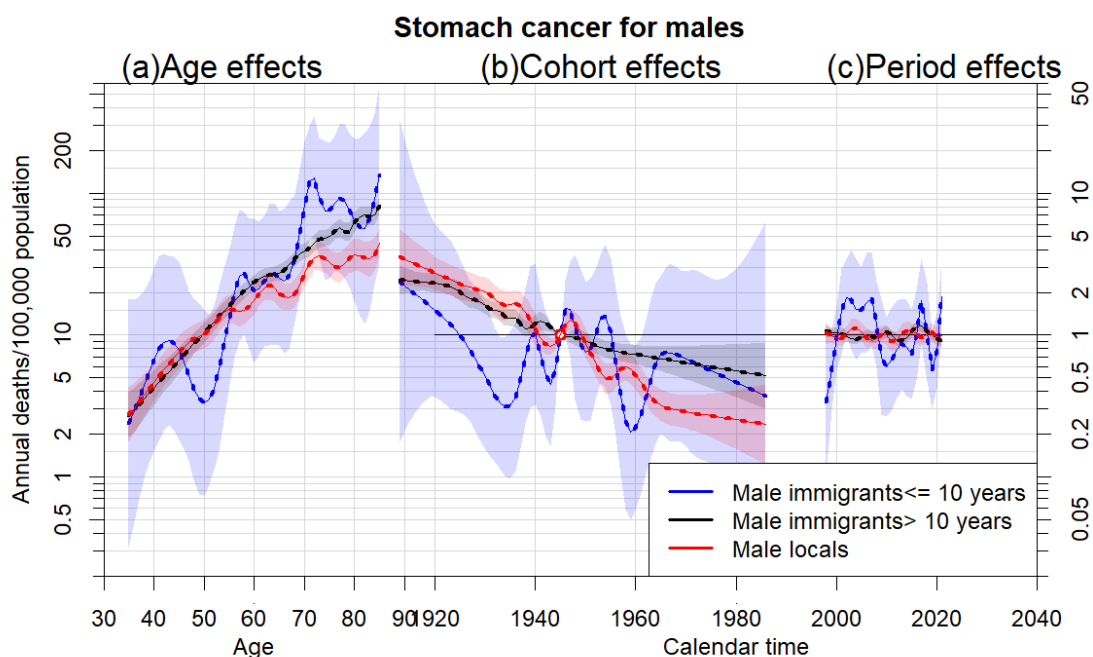

**Figure 4(a).** Parameter estimates of age (a), period (b) and cohort (c) effects based on an age-period-cohort model of male stomach cancer mortality rates by immigrant groups: locals, immigrants stay in Hong Kong for more than 10 years and immigrants stay in Hong Kong for less than or equal to 10 years. Age effect was assessed by mortality (left axis). Cohort and period effects were assessed by relative risk (right axis), 95% confidence intervals are shown as shaded bands.



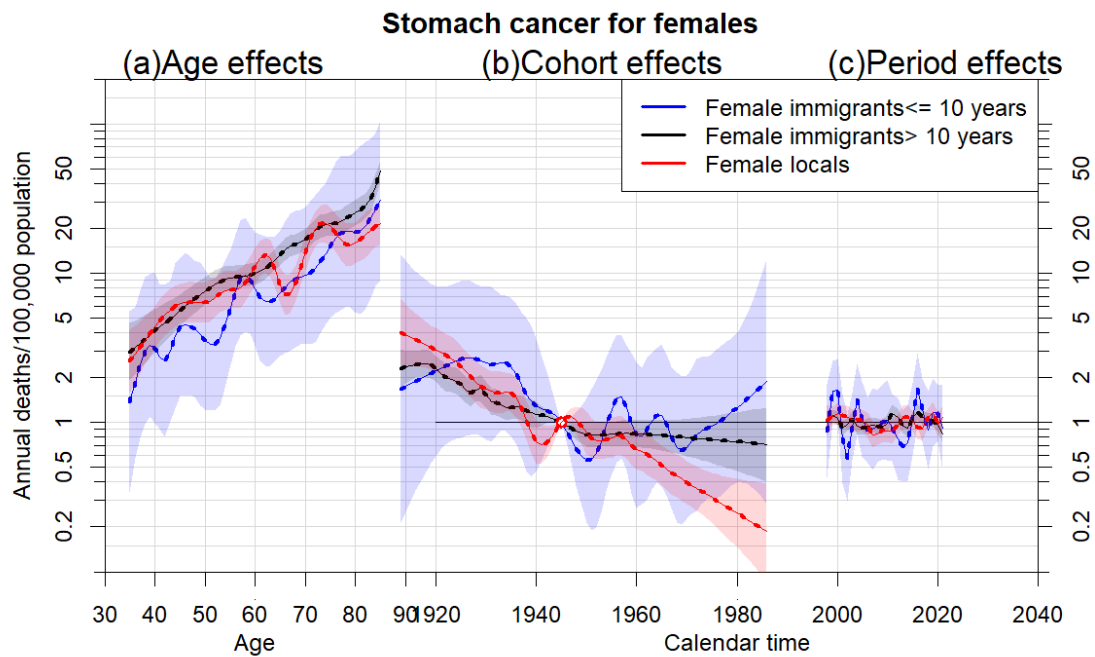

**Figure 4(b).** Parameter estimates of age (a), period (b) and cohort (c) effects based on an age-period-cohort model of female stomach cancer mortality rates by immigrant groups: locals, immigrants stay in Hong Kong for more than 10 years and immigrants stay in Hong Kong for less than or equal to 10 years. Age effect was assessed by mortality (left axis). Cohort and period effects were assessed by relative risk (right axis), 95% confidence intervals are shown as shaded bands.

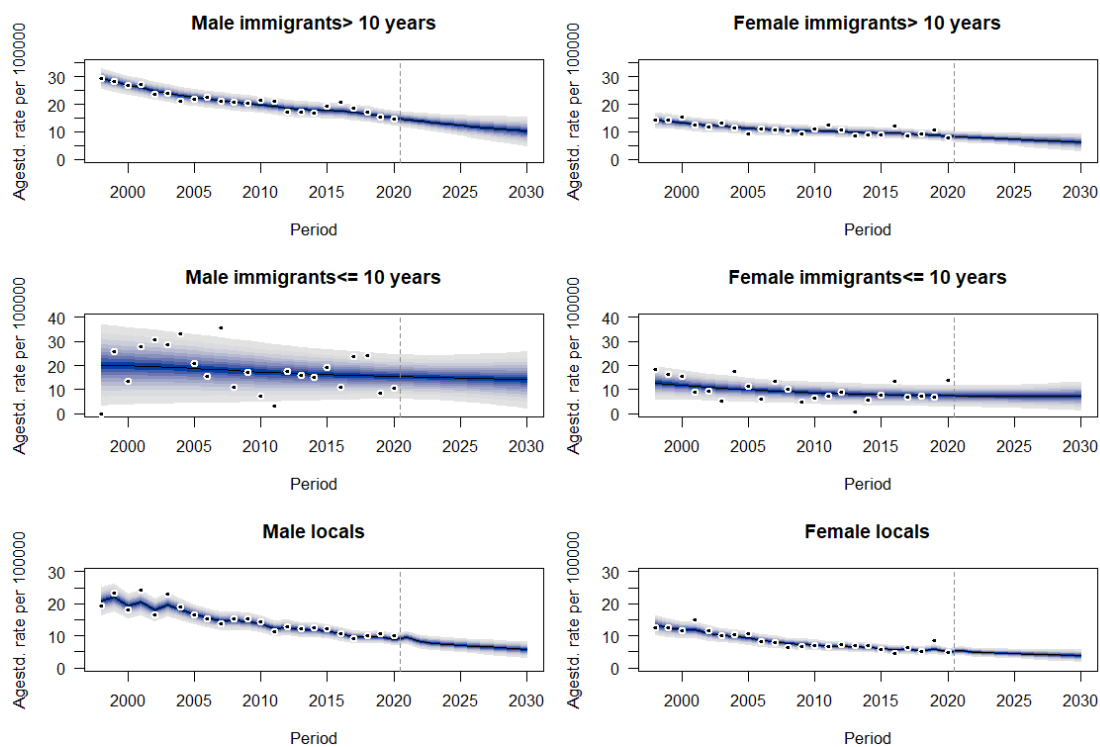

**eFigure 4(c).** Projections of stomach cancer mortality rates by gender and immigrant status from 2022 to 2030. Observations are shown as dots with the predictive distribution between the 5% and 95% quantile, whereby each lighter shade of blue represents an additional 10% predictive CI. The predictive mean is shown as black solid line and the vertical dashed line indicates where prediction started.

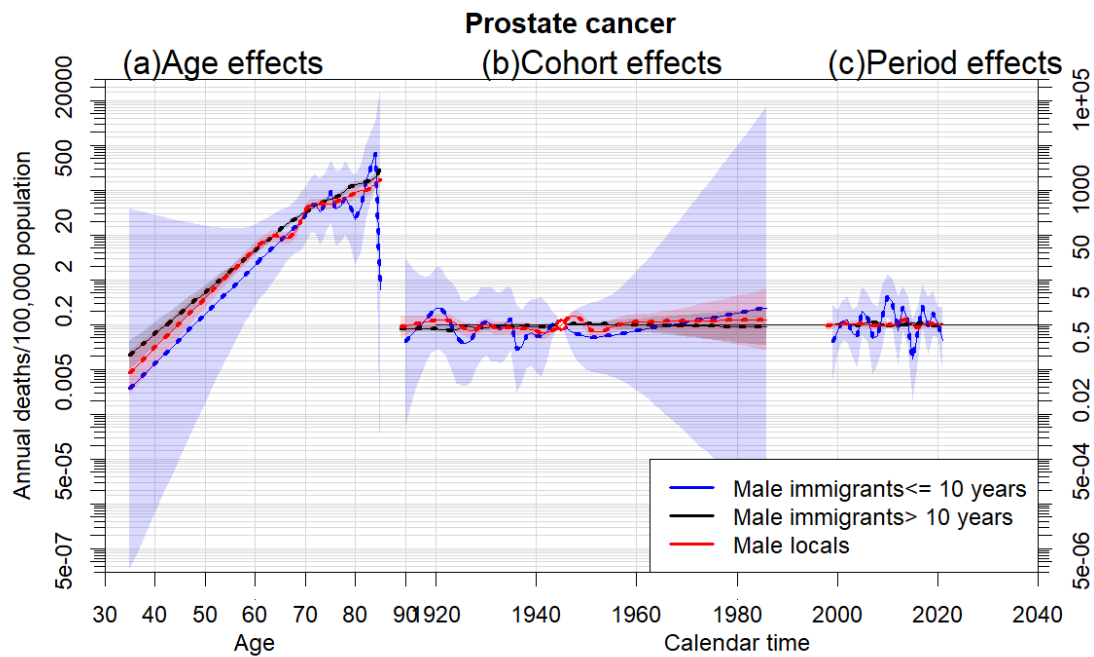

28 **eFigure 5(a).** Parameter estimates of age (a), period (b) and cohort (c) effects based on an  
29 age-period-cohort model of male prostate cancer mortality rates by immigrant groups: locals,  
30 immigrants stay in Hong Kong for more than 10 years and immigrants stay in Hong Kong for  
31 less than or equal to 10 years. Age effect was assessed by mortality (left axis). Cohort and  
32 period effects were assessed by relative risk (right axis), 95% confidence intervals are shown  
33 as shaded bands.  
34  
35  
36  
37  
38  
39  
40  
41  
42  
43  
44  
45  
46  
47  
48  
49  
50  
51  
52  
53  
54  
55  
56  
57  
58  
59  
60

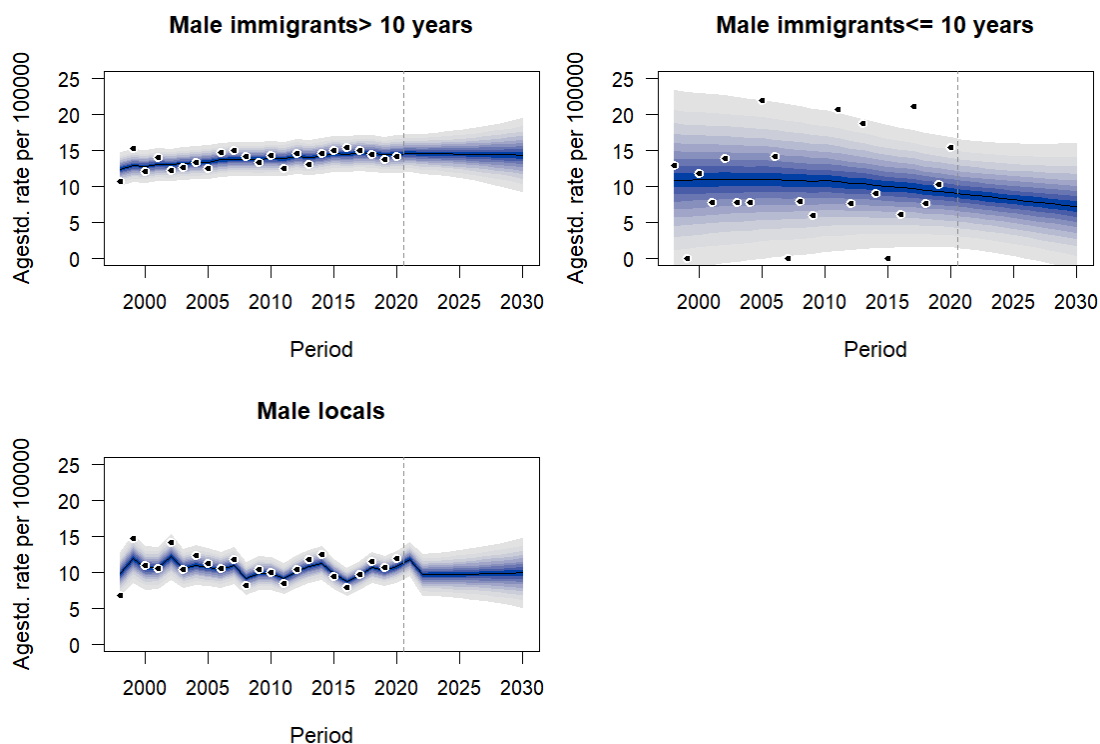

**eFigure 5(b).** Projections of prostate cancer mortality rates by immigrant status from 2022 to 2030. Observations are shown as dots with the predictive distribution between the 5% and 95% quantile, whereby each lighter shade of blue represents an additional 10% predictive CI. The predictive mean is shown as black solid line and the vertical dashed line indicates where prediction started.

# Reporting checklist for cohort study.

Based on the STROBE cohort guidelines.

## Instructions to authors

Complete this checklist by entering the page numbers from your manuscript where readers will find each of the items listed below.

Your article may not currently address all the items on the checklist. Please modify your text to include the missing information. If you are certain that an item does not apply, please write "n/a" and provide a short explanation.

Upload your completed checklist as an extra file when you submit to a journal.

In your methods section, say that you used the STROBE cohort reporting guidelines, and cite them as:

von Elm E, Altman DG, Egger M, Pocock SJ, Gøtzsche PC, Vandenbroucke JP. The Strengthening the Reporting of Observational Studies in Epidemiology (STROBE) Statement: guidelines for reporting observational studies.

|                           |                     |                                                                                                 | Page<br>Number |
|---------------------------|---------------------|-------------------------------------------------------------------------------------------------|----------------|
| <b>Title and abstract</b> |                     |                                                                                                 |                |
| Title                     | <a href="#">#1a</a> | Indicate the study's design with a commonly used term in the title or the abstract              | 1              |
| Abstract                  | <a href="#">#1b</a> | Provide in the abstract an informative and balanced summary of what was done and what was found | 2              |
| <b>Introduction</b>       |                     |                                                                                                 |                |
| Background / rationale    | <a href="#">#2</a>  | Explain the scientific background and rationale for the investigation being reported            | 4              |
| Objectives                | <a href="#">#3</a>  | State specific objectives, including any prespecified hypotheses                                | 4              |
| <b>Methods</b>            |                     |                                                                                                 |                |
| Study design              | <a href="#">#4</a>  | Present key elements of study design early in the paper                                         | 5              |
| Setting                   | <a href="#">#5</a>  | Describe the setting, locations, and relevant dates, including periods                          | 5              |

|    |                      |                                                                                                                                                                                                                                                                                         |     |
|----|----------------------|-----------------------------------------------------------------------------------------------------------------------------------------------------------------------------------------------------------------------------------------------------------------------------------------|-----|
|    |                      | of recruitment, exposure, follow-up, and data collection                                                                                                                                                                                                                                |     |
| 1  |                      |                                                                                                                                                                                                                                                                                         |     |
| 2  |                      |                                                                                                                                                                                                                                                                                         |     |
| 3  | Eligibility criteria | <a href="#">#6a</a> Give the eligibility criteria, and the sources and methods of selection of participants. Describe methods of follow-up.                                                                                                                                             | 5   |
| 4  |                      |                                                                                                                                                                                                                                                                                         |     |
| 5  |                      |                                                                                                                                                                                                                                                                                         |     |
| 6  | Eligibility criteria | <a href="#">#6b</a> For matched studies, give matching criteria and number of exposed and unexposed                                                                                                                                                                                     | n/a |
| 7  |                      |                                                                                                                                                                                                                                                                                         |     |
| 8  |                      |                                                                                                                                                                                                                                                                                         |     |
| 9  |                      |                                                                                                                                                                                                                                                                                         |     |
| 10 | Variables            | <a href="#">#7</a> Clearly define all outcomes, exposures, predictors, potential confounders, and effect modifiers. Give diagnostic criteria, if applicable                                                                                                                             | 5   |
| 11 |                      |                                                                                                                                                                                                                                                                                         |     |
| 12 |                      |                                                                                                                                                                                                                                                                                         |     |
| 13 |                      |                                                                                                                                                                                                                                                                                         |     |
| 14 |                      |                                                                                                                                                                                                                                                                                         |     |
| 15 | Data sources /       |                                                                                                                                                                                                                                                                                         |     |
| 16 | measurement          | <a href="#">#8</a> For each variable of interest give sources of data and details of methods of assessment (measurement). Describe comparability of assessment methods if there is more than one group. Give information separately for for exposed and unexposed groups if applicable. | 5   |
| 17 |                      |                                                                                                                                                                                                                                                                                         |     |
| 18 |                      |                                                                                                                                                                                                                                                                                         |     |
| 19 |                      |                                                                                                                                                                                                                                                                                         |     |
| 20 |                      |                                                                                                                                                                                                                                                                                         |     |
| 21 |                      |                                                                                                                                                                                                                                                                                         |     |
| 22 | Bias                 | <a href="#">#9</a> Describe any efforts to address potential sources of bias                                                                                                                                                                                                            | 5   |
| 23 |                      |                                                                                                                                                                                                                                                                                         |     |
| 24 | Study size           | <a href="#">#10</a> Explain how the study size was arrived at                                                                                                                                                                                                                           | 5   |
| 25 |                      |                                                                                                                                                                                                                                                                                         |     |
| 26 |                      |                                                                                                                                                                                                                                                                                         |     |
| 27 | Quantitative         |                                                                                                                                                                                                                                                                                         |     |
| 28 | variables            | <a href="#">#11</a> Explain how quantitative variables were handled in the analyses. If applicable, describe which groupings were chosen, and why                                                                                                                                       | 5   |
| 29 |                      |                                                                                                                                                                                                                                                                                         |     |
| 30 |                      |                                                                                                                                                                                                                                                                                         |     |
| 31 | Statistical          |                                                                                                                                                                                                                                                                                         |     |
| 32 | methods              | <a href="#">#12a</a> Describe all statistical methods, including those used to control for confounding                                                                                                                                                                                  |     |
| 33 |                      |                                                                                                                                                                                                                                                                                         |     |
| 34 | 5                    |                                                                                                                                                                                                                                                                                         |     |
| 35 |                      |                                                                                                                                                                                                                                                                                         |     |
| 36 |                      |                                                                                                                                                                                                                                                                                         |     |
| 37 | Statistical          | <a href="#">#12b</a> Describe any methods used to examine subgroups and interactions                                                                                                                                                                                                    | 5   |
| 38 | methods              |                                                                                                                                                                                                                                                                                         |     |
| 39 |                      |                                                                                                                                                                                                                                                                                         |     |
| 40 |                      |                                                                                                                                                                                                                                                                                         |     |
| 41 | Statistical          | <a href="#">#12c</a> Explain how missing data were addressed                                                                                                                                                                                                                            | 5   |
| 42 | methods              |                                                                                                                                                                                                                                                                                         |     |
| 43 |                      |                                                                                                                                                                                                                                                                                         |     |
| 44 | Statistical          | <a href="#">#12d</a> If applicable, explain how loss to follow-up was addressed                                                                                                                                                                                                         | n/a |
| 45 | methods              |                                                                                                                                                                                                                                                                                         |     |
| 46 |                      |                                                                                                                                                                                                                                                                                         |     |
| 47 |                      |                                                                                                                                                                                                                                                                                         |     |
| 48 | Statistical          | <a href="#">#12e</a> Describe any sensitivity analyses                                                                                                                                                                                                                                  |     |
| 49 | methods              |                                                                                                                                                                                                                                                                                         |     |
| 50 |                      |                                                                                                                                                                                                                                                                                         |     |
| 51 |                      |                                                                                                                                                                                                                                                                                         |     |
| 52 | n/a                  |                                                                                                                                                                                                                                                                                         |     |
| 53 |                      |                                                                                                                                                                                                                                                                                         |     |
| 54 | <b>Results</b>       |                                                                                                                                                                                                                                                                                         |     |
| 55 |                      |                                                                                                                                                                                                                                                                                         |     |
| 56 |                      |                                                                                                                                                                                                                                                                                         |     |
| 57 | Participants         | <a href="#">#13a</a> Report numbers of individuals at each stage of study—eg numbers potentially eligible, examined for eligibility, confirmed eligible,                                                                                                                                | n/a |
| 58 |                      |                                                                                                                                                                                                                                                                                         |     |
| 59 |                      |                                                                                                                                                                                                                                                                                         |     |
| 60 |                      |                                                                                                                                                                                                                                                                                         |     |

included in the study, completing follow-up, and analysed. Give information separately for for exposed and unexposed groups if applicable.

|    |                  |                      |                                                                            |
|----|------------------|----------------------|----------------------------------------------------------------------------|
| 1  |                  |                      |                                                                            |
| 2  |                  |                      |                                                                            |
| 3  |                  |                      |                                                                            |
| 4  |                  |                      |                                                                            |
| 5  | Participants     | <a href="#">#13b</a> | Give reasons for non-participation at each stage 5                         |
| 6  |                  |                      |                                                                            |
| 7  | Participants     | <a href="#">#13c</a> | Consider use of a flow diagram                                             |
| 8  |                  |                      |                                                                            |
| 9  |                  |                      |                                                                            |
| 10 | n/a              |                      |                                                                            |
| 11 |                  |                      |                                                                            |
| 12 | Descriptive data | <a href="#">#14a</a> | Give characteristics of study participants (eg demographic, clinical, 5    |
| 13 |                  |                      | social) and information on exposures and potential confounders. Give       |
| 14 |                  |                      | information separately for exposed and unexposed groups if                 |
| 15 |                  |                      | applicable.                                                                |
| 16 |                  |                      |                                                                            |
| 17 |                  |                      |                                                                            |
| 18 |                  |                      |                                                                            |
| 19 | Descriptive data | <a href="#">#14b</a> | Indicate number of participants with missing data for each variable of     |
| 20 |                  |                      | interest                                                                   |
| 21 |                  |                      |                                                                            |
| 22 |                  |                      |                                                                            |
| 23 | n/a              |                      |                                                                            |
| 24 |                  |                      |                                                                            |
| 25 | Descriptive data | <a href="#">#14c</a> | Summarise follow-up time (eg, average and total amount)                    |
| 26 |                  |                      |                                                                            |
| 27 |                  |                      |                                                                            |
| 28 | n/a              |                      |                                                                            |
| 29 |                  |                      |                                                                            |
| 30 | Outcome data     | <a href="#">#15</a>  | Report numbers of outcome events or summary measures over time.            |
| 31 |                  |                      | Give information separately for exposed and unexposed groups if            |
| 32 |                  |                      | applicable.                                                                |
| 33 |                  |                      |                                                                            |
| 34 |                  |                      |                                                                            |
| 35 | n/a              |                      |                                                                            |
| 36 |                  |                      |                                                                            |
| 37 |                  |                      |                                                                            |
| 38 | Main results     | <a href="#">#16a</a> | Give unadjusted estimates and, if applicable, confounder-adjusted 6        |
| 39 |                  |                      | estimates and their precision (eg, 95% confidence interval). Make          |
| 40 |                  |                      | clear which confounders were adjusted for and why they were                |
| 41 |                  |                      | included                                                                   |
| 42 |                  |                      |                                                                            |
| 43 |                  |                      |                                                                            |
| 44 | Main results     | <a href="#">#16b</a> | Report category boundaries when continuous variables were  n/a             |
| 45 |                  |                      | categorized                                                                |
| 46 |                  |                      |                                                                            |
| 47 |                  |                      |                                                                            |
| 48 | Main results     | <a href="#">#16c</a> | If relevant, consider translating estimates of relative risk into absolute |
| 49 |                  |                      | risk for a meaningful time period                                          |
| 50 |                  |                      |                                                                            |
| 51 |                  |                      |                                                                            |
| 52 | n/a              |                      |                                                                            |
| 53 |                  |                      |                                                                            |
| 54 | Other analyses   | <a href="#">#17</a>  | Report other analyses done—eg analyses of subgroups and 7                  |
| 55 |                  |                      | interactions, and sensitivity analyses                                     |
| 56 |                  |                      |                                                                            |
| 57 |                  |                      |                                                                            |

## Discussion

|    |                    |                     |                                                                          |    |
|----|--------------------|---------------------|--------------------------------------------------------------------------|----|
| 1  | Key results        | <a href="#">#18</a> | Summarise key results with reference to study objectives                 | 8  |
| 2  |                    |                     |                                                                          |    |
| 3  | Limitations        | <a href="#">#19</a> | Discuss limitations of the study, taking into account sources of         | 10 |
| 4  |                    |                     | potential bias or imprecision. Discuss both direction and magnitude of   |    |
| 5  |                    |                     | any potential bias.                                                      |    |
| 6  |                    |                     |                                                                          |    |
| 7  |                    |                     |                                                                          |    |
| 8  | Interpretation     | <a href="#">#20</a> | Give a cautious overall interpretation considering objectives,           | 8  |
| 9  |                    |                     | limitations, multiplicity of analyses, results from similar studies, and |    |
| 10 |                    |                     | other relevant evidence.                                                 |    |
| 11 |                    |                     |                                                                          |    |
| 12 |                    |                     |                                                                          |    |
| 13 | Generalisability   | <a href="#">#21</a> | Discuss the generalisability (external validity) of the study results    | 9  |
| 14 |                    |                     |                                                                          |    |
| 15 |                    |                     |                                                                          |    |
| 16 | <b>Other</b>       |                     |                                                                          |    |
| 17 | <b>Information</b> |                     |                                                                          |    |
| 18 |                    |                     |                                                                          |    |
| 19 |                    |                     |                                                                          |    |
| 20 | Funding            | <a href="#">#22</a> | Give the source of funding and the role of the funders for the present   | 11 |
| 21 |                    |                     | study and, if applicable, for the original study on which the present    |    |
| 22 |                    |                     | article is based                                                         |    |
| 23 |                    |                     |                                                                          |    |
| 24 |                    |                     |                                                                          |    |

25 The STROBE checklist is distributed under the terms of the Creative Commons Attribution License CC-BY.

26 This checklist was completed on 11. February 2023 using <https://www.goodreports.org/>, a tool made by the

27 [EQUATOR Network](#) in collaboration with [Penelope.ai](#)



# BMJ Open

## An age-period-cohort analysis and projection of cancer mortality in Hong Kong, 1998–2030

|                                 |                                                                                                                                                                                                                                                                                                                                                                                                                                                                                         |
|---------------------------------|-----------------------------------------------------------------------------------------------------------------------------------------------------------------------------------------------------------------------------------------------------------------------------------------------------------------------------------------------------------------------------------------------------------------------------------------------------------------------------------------|
| Journal:                        | <i>BMJ Open</i>                                                                                                                                                                                                                                                                                                                                                                                                                                                                         |
| Manuscript ID                   | bmjopen-2023-072751.R1                                                                                                                                                                                                                                                                                                                                                                                                                                                                  |
| Article Type:                   | Original research                                                                                                                                                                                                                                                                                                                                                                                                                                                                       |
| Date Submitted by the Author:   | 21-Jun-2023                                                                                                                                                                                                                                                                                                                                                                                                                                                                             |
| Complete List of Authors:       | Zhao, Yanji; The Hong Kong Polytechnic University, Department of Applied Mathematics<br>Zhuang, Zian; The Hong Kong Polytechnic University, Department of Applied Mathematics; University of California Los Angeles, Department of Biostatistics<br>Yang, Lin; The Hong Kong Polytechnic University, School of Nursing<br>He, Daihai; The Hong Kong Polytechnic University, Department of Applied Mathematics; The Hong Kong Polytechnic University, Research Institute for Future Food |
| <b>Primary Subject Heading</b>: | Research methods                                                                                                                                                                                                                                                                                                                                                                                                                                                                        |
| Secondary Subject Heading:      | Public health, Oncology                                                                                                                                                                                                                                                                                                                                                                                                                                                                 |
| Keywords:                       | STATISTICS & RESEARCH METHODS, ONCOLOGY, Risk Factors                                                                                                                                                                                                                                                                                                                                                                                                                                   |
|                                 |                                                                                                                                                                                                                                                                                                                                                                                                                                                                                         |

SCHOLARONE™  
Manuscripts



I, the Submitting Author has the right to grant and does grant on behalf of all authors of the Work (as defined in the below author licence), an exclusive licence and/or a non-exclusive licence for contributions from authors who are: i) UK Crown employees; ii) where BMJ has agreed a CC-BY licence shall apply, and/or iii) in accordance with the terms applicable for US Federal Government officers or employees acting as part of their official duties; on a worldwide, perpetual, irrevocable, royalty-free basis to BMJ Publishing Group Ltd ("BMJ") its licensees and where the relevant Journal is co-owned by BMJ to the co-owners of the Journal, to publish the Work in this journal and any other BMJ products and to exploit all rights, as set out in our [licence](#).

The Submitting Author accepts and understands that any supply made under these terms is made by BMJ to the Submitting Author unless you are acting as an employee on behalf of your employer or a postgraduate student of an affiliated institution which is paying any applicable article publishing charge ("APC") for Open Access articles. Where the Submitting Author wishes to make the Work available on an Open Access basis (and intends to pay the relevant APC), the terms of reuse of such Open Access shall be governed by a Creative Commons licence – details of these licences and which [Creative Commons](#) licence will apply to this Work are set out in our licence referred to above.

Other than as permitted in any relevant BMJ Author's Self Archiving Policies, I confirm this Work has not been accepted for publication elsewhere, is not being considered for publication elsewhere and does not duplicate material already published. I confirm all authors consent to publication of this Work and authorise the granting of this licence.

# An age-period-cohort analysis and projection of cancer mortality in Hong Kong, 1998–2030

Yanji Zhao<sup>1, #</sup>, Zian Zhuang<sup>1,2, #</sup>, Lin Yang<sup>3</sup> and Daihai He<sup>1,4\*</sup>

1 Department of Applied Mathematics, Hong Kong Polytechnic University, Hong Kong, China

2 Department of Biostatistics, University of California, Los Angeles, CA, United States

3 School of Nursing, Hong Kong Polytechnic University, Hong Kong, China

4 Research Institute for Future Food, Hong Kong Polytechnic University, Hong Kong, China

# These authors contributed equally to this work.

\* To whom correspondence should be addressed:

Department of Applied Mathematics, The Hong Kong Polytechnic University, Hong Kong, China

Tel: 852-27667864; [daihai.he@polyu.edu.hk](mailto:daihai.he@polyu.edu.hk) (DH).

## Email of all authors

Yanji Zhao: [yan-ji.zhao@connect.polyu.hk](mailto:yan-ji.zhao@connect.polyu.hk); Zian Zhuang: [zianzhuang@ucla.edu](mailto:zianzhuang@ucla.edu);

Lin Yang: [l.yang@polyu.edu.hk](mailto:l.yang@polyu.edu.hk); Daihai He: [daihai.he@polyu.edu.hk](mailto:daihai.he@polyu.edu.hk).

*Word count: 3263*

## 24 Abstract

25 **Objectives:** Complicated population distribution and immigration status in Hong Kong have  
26 brought out intricate causes of diseases. This study was aimed to explore age, period, birth  
27 cohort effects and effects across genders and immigration groups on mortality rates of lung,  
28 pancreatic, colon, liver, prostate and stomach cancers and their projections.

30 **Design, Setting, and Participants:** Death registry data in Hong Kong between 1998 and 2021,  
31 which were stratified by age, sex and immigration status. Immigration status was classified into  
32 three groups: locals born in Hong Kong, long-stay immigrants and short-stay immigrants.

34 **Methods:** Age-period-cohort analysis was used to examine age, period, and birth cohort effects  
35 for genders and immigration groups from 1998 to 2021. Bayesian age-period-cohort models  
36 were applied to predict the mortality rates from 2022 to 2030.

38 **Results:** Short-stay immigrants revealed pronounced fluctuations of mortality rates by age and  
39 of relative risks by cohort and period effects for six types of cancers than those of long-stay  
40 immigrants and locals. Decreasing trends ( $p<0.05$ ) or plateau ( $p>0.05$ ) of forecasting mortality  
41 rates of cancers occur for all immigration groups, except for increasing trends for short-stay  
42 male immigrants with colon cancer (16.77 deaths to 18.50 deaths/100,000  $p<0.05$ ) and long-  
43 stay male immigrants with pancreatic cancer (17.87 deaths to 23.49 deaths/100,000  $p<0.05$ ).  
44 Men will be at a higher risk of mortality from cancers than women in the future (excluding  
45 prostate cancer). Immigrants for each type of cancer and gender will be at a higher mortality  
46 risk than locals.

48 **Conclusions:** Findings underscore the effect of gender and immigration status in Hong Kong  
49 on mortality risks of cancers that immigrants for each type of cancer and gender will be at a  
50 higher mortality risk than locals.

52 **Keywords:** Age-period-cohort analysis, immigration, mortality, lung cancer, pancreatic cancer,  
53 colon cancer, liver cancer, prostate cancer, stomach cancer

1  
2  
3  
4  
5  
6  
7  
8  
9  
10  
11  
12  
13  
14  
15  
16  
17  
18  
19  
20  
21  
22  
23  
24  
25  
26  
27  
28  
29  
30  
31  
32  
33  
34  
35  
36  
37  
38  
39  
40  
41  
42  
43  
44  
45  
46  
47  
48  
49  
50  
51  
52  
53  
54  
55  
56  
57  
58  
59  
60  
61  
62

## 55 **Strengths and limitations of this study**

56

57 • This study provides new evidence regarding the relationship between immigration status  
58 and cancer mortality, given the effects of age, period, birth cohort and their predictions.

59

60 • The non-identifiability problem has not been interpreted in APC models

61

62 • The future perspective of cancer therapies and techniques have not been considered.

For peer review only

## 64 **Introduction**

65 Several migration waves from mainland China to Hong Kong have occurred over the past  
66 century. These migration waves included a large-scale migration inflow from 1945 to 1950 (the  
67 Chinese Civil War) and a few small-scale inflows in the 1950s, 1970s, and 1990s [1-3]. In 2016,  
68 immigrants from mainland China formed approximately 38% of the population of Hong Kong.  
69 These inflows have led to a growing interest in research on the disparity of health conditions  
70 between the locals and immigrants.

71  
72 Cancer has been one of most common causes of death, as an estimated 19.3 million new cancer  
73 cases and 9.9 million new cancer-associated deaths occurred worldwide in 2020 [4]. In Hong  
74 Kong, lung cancer is one of the most common causes of cancer deaths [5, 6]. Previous studies  
75 suggested that the primary cause of lung cancer is cigarette smoking [7-11]. Genetic factors,  
76 asbestos, radon gas, second-hand smoke, and other forms of air pollution have been proven to  
77 influence the risk of lung cancer [12-18]. The overall daily smoking rate in mainland China was  
78 approximately 23.2% in 2018 [19], whereas the daily smoking rate in Hong Kong was only  
79 10.2% in 2019 [20]. The leading causes of liver cancer include viral infection, drinking of  
80 alcohol and polluted water and food supplies which are also culprits for colon, stomach and  
81 pancreatic cancer [21]. Alcohol consumption per capita in Hong Kong has reached to 2.37 liters  
82 in 2021 [22], compared to 7.0 liters of per capita consumption of alcohol in mainland China in  
83 2018 [23]. As approximately 99% of prostate cancer cases occur after age 50, factors of prostate  
84 cancer have been regarded as old age, race, family history and the diet of red meat consumption  
85 [24]. In addition to these risk factors, studies have suggested that cancer mortality rates vary  
86 depending on migrant status [25-28]. According to data from the Census and Statistics  
87 Department of Hong Kong, approximately 81% of immigrants in Hong Kong immigrated from  
88 China mainland, Macau, and Taiwan. Immigrants from mainland China account for a bulk of  
89 this population. Previous studies have shown that child immigrants in Hong Kong tend to suffer  
90 from a higher risk of wheezing disorders and cardiovascular diseases, and immigrant women  
91 have higher age-specific mortality rates of breast cancer than locally-born women in Hong  
92 Kong [29, 30]. However, to date, few studies have investigated the effect of length of stay in  
93 Hong Kong and birthplace on the risk of other types of cancer.

94  
95 In this study, we compared the mortality rates of lung, pancreatic, colon, liver, prostate and  
96 stomach cancers between locally born residents in Hong Kong and immigrants from mainland  
97 China. Both populations are widely considered as ethnically homogeneous with similar cultures.  
98 Nevertheless, due to different early life experiences, immigrants are exposed to more various  
99 social economy and lifestyle than locals. Therefore, it's constructive to ascertain whether  
100 immigrants from mainland China have a different mortality pattern of cancers with locals to

1  
2  
3  
4 101 verify the significance of migration status for this health outcome. As Age-period-cohort (APC)  
5 102 analysis plays a vital role in studying time-specific phenomena in epidemiology, in this study,  
6 103 we developed APC models specified by sex and migrant status to assess the effects of age,  
7 104 period, birth cohort, and of the length of stay in Hong Kong on the mortality risks of cancers.  
8 105 Additionally, we explore the projection of mortality rates for the locally born population and  
9 106 immigrants in Hong Kong who were younger or older than 60 using a predictive model, taking  
10 107 into account age, period, and birth cohort effects as well.  
11  
12  
13  
14 108

## 15 16 109 **Methods**

### 17 18 110 *Data*

19 111 We obtained the death registry data in Hong Kong between 1998 and 2021 from the Census  
20 112 and Statistics Department of Hong Kong, as the data in 2022 has not been available up to now.  
21 113 The data was extracted a routine census held by Hong Kong government as subjective errors  
22 114 caused by resampling can be neglected. The population data were stratified by age, sex,  
23 115 immigration status, and length of stay in Hong Kong. We retrieved six types of cancer cases  
24 116 from the death registry data using ICD codes, such as ICD-9 code 162 and ICD-10 codes  
25 117 C34.0–C34.3, C348, and C349 for lung cancer. To assure comparability among  
26 118 registries, deaths from the age group of 35–85 years were selected, since cases younger than 35  
27 119 and older than 85 were relatively trivial for lack of statistical interpretability [31]. Immigration  
28 120 status was classified into three groups: locals born in Hong Kong, immigrants who have lived  
29 121 in Hong Kong for >10 years before death defined as long-stay immigrants, and immigrants who  
30 122 have lived in Hong Kong for ≤10 years before death defined as short-stay immigrants. Notably,  
31 123 much focus was placed on immigrants from mainland China, because approximately 81% of  
32 124 immigrants in Hong Kong came from mainland China, Macau, and Taiwan based on the data  
33 125 from the Census and Statistics Department of Hong Kong. Moreover, few cases recorded from  
34 126 Macau and Taiwan are statistically insignificant in the analysis. Demographics and population  
35 127 projections from 2022 to 2030 were retrieved from the Census and Statistics Department of  
36 128 Hong Kong and estimated with cubic smoothing spline as the prerequisite of the predictive  
37 129 model. Codes for APC and BAPC analysis are available in the GitHub repository  
38 130 (<https://github.com/kshz2164313/APC-population-projections-for-immigration-HK>).  
39  
40  
41  
42  
43  
44  
45  
46  
47  
48  
49  
50  
51  
52

### 53 133 *Statistical analysis*

54 134 We modeled cancer mortality rates in Hong Kong using APC analysis based on log-linear  
55 135 Poisson regression models. The model aimed to disentangle age, period, and cohort effects of  
56 136 time-varying phenomena simultaneously [32, 33], given that

$$57 137 \log(E_{ij}) = \alpha_i + \beta_j + \gamma_k + \mu + \log(\theta_{ij}) \quad (1)$$

1  
2  
3 138 where  $E_{ij}$  denotes expected mortality;  $\alpha_i$ ,  $\beta_j$ , and  $\gamma_k$  denote age, period, and cohort  
4 139 effect, respectively, for  $i = 1, \dots, I$ ,  $j = 1, \dots, J$ ,  $k = 1, \dots, K$  with  $k = I - i + j$ .  
5  
6 140  $\log(\theta_{ij})$  is the offset. We mainly focused on the contributions of sex and immigration status  
7  
8 141 due to the non-identifiability problem that the effects of these three components are collinear  
9 142 with each other (denoted as period – age = cohort) [34]. Birth cohort effect and period effect  
10 143 were assessed with relative risks. The median date of birth among cases were regarded as the  
11 144 reference cohort. Since cases aged at 35–85 years between 1998 and 2021 were selected, the  
12 145 range of birth cohort from 1913 to 1986 covered observations and further projections until  
13 146 2030. The second and penultimate period effects were constrained to the reference for period.  
14 147 For sex and immigration status, maximum likelihood framework was applied to estimate the  
15 148 relative risks and 95% confidence intervals (CIs) by age groups, calendar period, and birth  
16 149 cohort.

17  
18  
19 150  
20  
21 151 Several projection approaches for future cancer mortality have been developed, but a  
22 152 Bayesian age-period-cohort (BAPC) model built upon integrated nested Laplace  
23 153 approximations (INLA) [35] yields relatively higher coverage and better performance for all  
24 154 evaluated parameter combinations [36]. To prevent some sampling problems caused by  
25 155 Markov chain Monte Carlo (MCMC), this MCMC-free BAPC approach was applied to  
26 156 predict future cancer mortality within a fully Bayesian inference setting and provide outputs  
27 157 of interest simply, such as projected age-standardized and age-specific rates. Convergence  
28 158 checks are not necessary for this technique [35]. The projections of age-standardized cancer  
29 159 mortality rates for each sex, age group (younger or older than 60 years) and migrant status,  
30 160 taking into account age, period, and birth cohort effects, were performed based on the weights  
31 161 of population age groups from the WHO World Standard population [37], with 95%  
32 162 prediction intervals. Mann-Kendall trend test was applied to verify the projection trend.

33  
34  
35  
36 163  
37 164 All analyses were performed via R version 4.2.1 (R Core Team, R Foundation for Statistical  
38 165 Computing, Vienna, Austria, 2013, <http://www.R-project.org/>). The APC models were  
39 166 established using the Epi package, and the projections based on Bayesian APC models were  
40 167 performed with the BAPC package.

#### 41 168 42 169 Patient and Public Involvement

43 170 None.

44 171

45 172

## 46 173 **Results**

47 174 Figure 1 and eFigure 1(a-e) in **Supplementary Material** illustrate the estimates of age  
48 175 (assessed by cancer mortality), cohort and period effects (assessed by relative risk) based on  
49 176 APC models among three migrant groups for men and women with six types of cancers,



1  
2  
3  
4 177 respectively. All the mortality rates for each gender and immigration status exhibit notable  
5 178 increasing trends with age. Age, cohort and period effects of six types of cancer for immigrants  
6 179 who stayed in Hong Kong for  $\leq 10$  years revealed relatively more pronounced fluctuations and  
7  
8 180 deviations from those effects in other two immigration groups. Significant increasing trends of  
9  
10 181 age effect occurred in all types of cancer, regardless of gender and immigration status. For  
11  
12 182 example, while relatively insignificant differences in lung cancer mortality rates by  
13  
14 183 immigration status among females, male immigrants who remained in Hong Kong for  $> 10$  years  
15  
16 184 had higher lung cancer mortality rates at ages above 50 years and those who arrived  $\leq 10$  years  
17  
18 185 had lower lung cancer mortality at ages below 62 years compared to local men Figure 1. In  
19  
20 186 addition to compatible dynamics of period effect for locals and long-stay immigrants, similar  
21  
22 187 change of relative risks by birth cohort for locals and long-stay immigrants in lung, colon, liver  
23  
24 188 and stomach cancers occurred before 1945, whereas significant differences of relative risks by  
25  
26 189 birth cohort between these two immigration groups occurred after 1960 (Figure 1 & eFigure  
27  
28 190 1(a,b,d)). Locals and long-stay immigrants in pancreatic and prostate cancer perform almost  
29  
30 191 similar change of relative risks by birth cohort effects all the time (eFigure 1(c,e)). Short-stay  
31  
32 192 immigrants who have stayed in Hong Kong for  $\leq 10$  years had more fluctuating relative risks  
33  
34 193 affected by period effects before 2020 than those for locals and long-stay immigrants. Lack of  
35  
36 194 young cases, especially young short-stay immigrants, of prostate cancer leads to significant  
37  
38 195 deviations and variances in age and cohort effects.  
39  
40 196

41  
42 197 Figure 2-4, eFigure 2-6 in **Supplementary Material** illustrate the age-standardized mortality  
43  
44 198 rates of six types of cancer from 1998 to 2021 and their projections by sex, immigrant status  
45  
46 199 and age groups from 2022 to 2030, taking into account age, period, and birth cohort effects.  
47  
48 200 Means and standard deviations of predictive mortality rates are shown in eTable 1-6 in  
49  
50 201 **Supplementary Material**. For all ages projection (Figure 2 & eFigure 2-6), monotone  
51  
52 202 decreasing trends or plateau of forecasting occur for both genders and all immigration groups  
53  
54 203 in cancers, except for increasing trends for male immigrants who have stayed in Hong Kong  
55  
56 204 for  $\leq 10$  years with colon cancer (p-value  $< 0.05$ ) and immigrants who have stayed in Hong  
57  
58 205 Kong for  $> 10$  years with pancreatic cancer (p-values  $< 0.05$ ). Most of predictive trends for  
59  
60 206 younger cases ( $< 60$  years) and older cases ( $\geq 60$  years) reach a consensus with those for all ages  
207  
208 207 population, except for two phenomenon: 1.) mortality rates of lung cancer for men immigrants  
209  
210 208  $\leq 10$  that insignificant trend for all ages (p-value  $> 0.05$ ) vs. decline for younger cases (p-value  
211  
212 209  $< 0.05$ ) vs. increase for older cases (p-value  $< 0.05$ ); 2.) mortality rates of liver cancer for men  
213  
214 210 immigrants  $> 10$  that decline for all ages (p-value  $< 0.05$ ) vs. decline for younger cases (p-value  
215  
216 211  $< 0.05$ ) vs. insignificant trend for older cases (p-value  $> 0.05$ ). Men will be at higher risk of  
217  
218 212 mortality rates of cancers (excluding prostate cancer) than women in the future for all three age  
219  
220 213 groups (all ages, young and older than 60 years). Given the future developing trends,

1  
2  
3 214 immigrants, especially the group of immigrant who have stayed in Hong Kong for >10 years  
4 215 with lung, liver, pancreatic, prostate and colon cancer, will have relatively higher mortality  
5 216 rates in each year for each gender compared with locals and pronounced decline in predictive  
6 217 means (all p-values < 0.05). Some particular cases occur in the projection of prostate cancer  
7 218 that young long-stay male immigrants (0.44 deaths/100,000) aged less than 60 will be at lower  
8 219 mortality rate than locals (0.69 deaths/100,000) in 2030 (eTable 6). Compared with other  
9 220 cancers and immigration groups, male immigrants who have stayed in Hong Kong for >10  
10 221 years with lung cancer would perform the most significant decline in predictive mean from  
11 222 100.18 to 79.55 deaths per 100,000 population (average 2.92 deaths/100,000 per annum)  
12 223 (eTable 1), while the same immigration group with pancreatic cancer would indicate the most  
13 224 significant uptrend in each year of 17.87 deaths and 23.49 deaths per 100,000 population in  
14 225 2022 and 2030, respectively (average 0.62 deaths/100,000 per annum) (eTable 4).  
15  
16  
17  
18  
19  
20  
21  
22  
23  
24  
25

## 26 229 **Discussion**

27  
28 230 Early detection of cancer is positive and instructive for increasing chances of cure. Nevertheless,  
29 231 the high mortality rate of cancer results from late diagnosis among most patients after  
30 232 progression to more advanced or severe stages. Individuals at high risk of cancer, such as  
31 233 smokers, alcoholics or those who are frequently exposed to susceptible circumstances, should  
32 234 be screened for early detections to increase opportunities for cure [38]. Therefore, the  
33 235 differences in mortality rates among immigration groups are synonymous with detection means,  
34 236 therapies, and social history in disparate periods and areas.  
35  
36  
37  
38  
39

40 238 While the changes in mortality rates by age for long-stay immigrants reached approximate  
41 239 harmony with those for locals, the changes in mortality rates by age for short-stay immigrants  
42 240 revealed clear differences with those for other two populations. The group of long-stay  
43 241 immigrants had a higher risk of death from lung, colon and liver cancers than the other two  
44 242 immigration groups after the age of 60 years. Short-stay male immigrants were less likely to  
45 243 die from lung cancer before the age of 65 years. The contrast in age effects among the  
46 244 immigration groups was partially consistent with studies [25, 39] that highlighted the age  
47 245 effects for locals and immigrants on breast cancer mortality in Hong Kong and lung cancer  
48 246 incidence in Sweden, as they both showed similar trends and magnitudes between locals and  
49 247 immigrants before the age of 60 years. They are also compatible with the results in [40] that  
50 248 diagnosis of liver cancer is the most frequent among populations at 55 to 65 years old.  
51 249 According to these trends, young individuals, especially new young immigrant men, who  
52 250 have benefited from all-rounded development in mainland China and Hong Kong, are more  
53 251 likely to seek early detection and be treated for cancers using more advanced treatments [41].  
54  
55  
56  
57  
58  
59  
60

1  
2  
3 252 Differences in birth cohort effects among immigrant groups partially comply with the  
4 253 interpretation above.

5  
6 254

7  
8 255 We observed significant trends of cohort effects among locals and immigrants. These findings  
9 256 are partially consistent but subtly different from previous findings, regarding the effect of  
10 257 immigration status on cancers. Zhao et al. [25] described multiple peaks of cohort effects on  
11 258 breast cancer mortality between locals and immigrants in Hong Kong, as well as a significant  
12 259 decline of cohort effects after 1950. In contrast, Sung et al. [42] investigated the difference in  
13 260 breast cancer incidence between Chinese Americans and non-Hispanic whites in the U.S. and  
14 261 emphasized that Chinese Americans were at lower risk of breast cancer than non-Hispanic  
15 262 whites born in the same year. Here, we interpret the cohort-driven trends resulting from the  
16 263 intricacy of social history and lifestyle. Compared to a relatively stable social development in  
17 264 Hong Kong, representing downward trends of relative risks for locals, wars and social  
18 265 instability in mainland China resulted in several immigration waves from mainland China to  
19 266 Hong Kong before 1950. Additionally, remarkable increasing trends were recorded for new  
20 267 immigrants after 1950, which corresponded to the economic downturn after wars and famine  
21 268 between 1959 and 1961 during their youth [43]. The increasing trends for new immigrants  
22 269 and similar trends for locals and long-stay immigrants were consistent with the finding that  
23 270 nutrient deficiency contributes to higher risk of severe mortality rates of cancers [44].

24 271 Furthermore, we speculate that these trends, especially those for locals and long-stay  
25 272 immigrants, are most likely attributed to social development and personal behaviors, such as  
26 273 daily habits, occupational history, different diagnoses and treatments, and domestic  
27 274 environmental exposures. It's notable that short-stay immigrants suffered from lower risk of  
28 275 death from colon cancer for all ages (eFigure 1a in **Supplementary Material**). As locals and  
29 276 immigrants in Hong Kong transitioned to a more westernized lifestyles, higher consumption  
30 277 of meat was associated with a higher risk of these types of cancer, whereas consumptions of  
31 278 vegetables had a strong protective effect against pancreatic cancer, and moderate  
32 279 consumption of coffee appeared to be beneficial against lung cancer [45,46]. Further studies  
33 280 on potential risk factors are required.

34 281

35 282 Short-stay immigrants had more fluctuating and non-stationary but inconspicuous relative  
36 283 risks by period effects before 2021 than locals and long-stay immigrants. Cumulatively, an  
37 284 arch pattern and fluctuating curve depicting period effects externally resulted in an arch  
38 285 pattern of age-standardized mortality rates for short-stay immigrant women and irregular rates  
39 286 for short-stay immigrant men before 2021. The external performance of different period  
40 287 effects on mortality rates could be most likely attributed to the higher effect of different  
41 288 lifestyles and social development on new immigrants than on long-stay immigrants and locals  
42 289 in Hong Kong. With respect to the age-standardized mortality rates and projections,

1  
2  
3  
4 290 consistent with previous findings [47,48], we predict that the mortality rates of cancer in  
5 291 Hong Kong after 2021 will continue to decline or remain relatively stable, consistent with the  
6 292 trends before 2020, except for male immigrants who have stayed in Hong Kong for  $\leq 10$  years  
7  
8 293 with colon cancer and male immigrants who have stayed in Hong Kong for  $>10$  years with  
9 294 pancreatic cancer. Men will be at higher risk of mortality rates of cancer than women,  
10 295 regardless of immigration status. They are also compatible with the results in [4] that men  
11 296 suffer from higher risk of these types of cancer than women, excluding prostate cancer.  
12  
13 297 Furthermore, new immigrant women will be at lower risk than local women, even though  
14 298 long-stay immigrants will suffer from higher mortality rates than locals in the future. Potential  
15 299 interpretations could be consistent with those for birth cohort effects, as age and period effect  
16  
17 300 are considered as confounders of cohort effect.  
18  
19 301

20 302 In the past few decades, spurred by an increasing burden of high incidence and mortality rates  
21 303 of cancer, several studies focused on the inherent identification dilemma of three effects in the  
22 304 APC model. Further, complicated population distribution and immigration status in Hong  
23 305 Kong, one of the areas with the highest population density and migration frequency in the  
24 306 world, have intricate causes and inherent dynamics of cancer and other diseases. To our  
25 307 knowledge, few studies have assessed the relationship between immigration status and cancer  
26 308 mortality. Therefore, this study is original to examine the effect of the length of stay in Hong  
27 309 Kong and origins of previous residence on cancer deaths, which is instructive for further  
28 310 immigration policy making and targeted strategies of disease detection and intervention.  
29 311 However, this study had several limitations. Given the non-identifiability problem in age-  
30 312 period-cohort models, we could only depict trends and variations among different  
31 313 immigration and sex groups, as illustrated in figures, and insufficiently perform the estimates  
32 314 of the contributions of three effects or subgroups to mortality rates. Furthermore, we adopted  
33 315 cubic smoothing spline to estimate populations of immigrants and locals due to the large  
34 316 proportion of unspecified immigration status from official demographic projections. A few  
35 317 acceptable cases resulted in a limited type of cancer so that some common cancers such as  
36 318 ovary and cervix, were discarded. Since the issue of quantification, the future perspective of  
37 319 cancer therapies and techniques have not been considered in the model of projection.  
38  
39 320  
40  
41 321

## 322 **Conclusion**

323 We conclude that immigrants, especially short-stay immigrants, had more pronounced  
324 324 fluctuations of mortality rates by age and of relative risks by cohort and period effects for six  
325 325 types of cancers than those of long-stay immigrants and locals. Men will be at a higher risk of  
326 326 mortality rates of six types of cancer than women in the future. Male immigrants who have

1  
2  
3  
4 327 stayed in Hong Kong for  $\leq 10$  years with colon cancer and male immigrants who have stayed  
5 328 in Hong Kong for  $> 10$  years with pancreatic cancer would perform significant uptrend in the  
6 329 future, while other immigration groups for each type of cancer would continue to decline or  
7  
8 330 remain relatively stable. Immigrants for each gender in Hong Kong would suffer from higher  
9 331 mortality risks of cancers than locals in the future.  
10 332  
11  
12  
13  
14  
15  
16  
17  
18  
19  
20  
21  
22  
23  
24  
25  
26  
27  
28  
29  
30  
31  
32  
33  
34  
35  
36  
37  
38  
39  
40  
41  
42  
43  
44  
45  
46  
47  
48  
49  
50  
51  
52  
53  
54  
55  
56  
57  
58  
59  
60

For peer review only

1  
2  
3  
4 333 **Declaration**

5  
6 334 **Ethical approval and consent to participate**

7  
8 335 Ethical approval and consent to participate are not applicable. This study does not involve  
9  
10 336 human participants. Data was obtained from the Census and Statistics Department of Hong  
11  
12 337 Kong.

13  
14 338 **Consent for publication**

15  
16 339 Not applicable.

17  
18 340 **Data Availability Statement**

19  
20 341 Data are available upon reasonable request.

21  
22 342 **Author contributions**

23  
24 343 **Yanji Zhao:** Methodology, Formal analysis, Data Curation, Writing - Original Draft,  
25 344 Visualization

26  
27 345 **Zian Zhuang:** Methodology, Formal analysis, Data Curation, Writing - Review & Editing

28 346 **Lin Yang:** Validation, Writing - Review & Editing

29 347 **Daihai He:** Conceptualization, Writing - Review & Editing, Supervision

30 348

31  
32 349 **Funding**

33  
34 350 The work described in this paper was partially supported by a grant from the Research Grants  
35 351 Council of the Hong Kong Special Administrative Region, China (HKU C7123-20G).

36  
37 352 **Conflict of interest**

38  
39 353 None declared.

40  
41 354 **Acknowledgements**

42  
43 355 None.

44  
45 356



## 358 References

- 359
- 360 1. Fan S-C. The population projection of Hong Kong. *Southeast Asian Journal of Social Science*.  
361 1974;2(1/2):105-17.
- 362 2. Department CaS. Hong Kong Statistics 1947-1967 (Report).  
363 [https://www.statistics.gov.hk/pub/hist/1961\\_1970/B10100031967AN67E0100.pdf](https://www.statistics.gov.hk/pub/hist/1961_1970/B10100031967AN67E0100.pdf),  
364 Accessed 4th May 2019.
- 365 3. Department CaS. Demographic Trends in Hong Kong 1981-2011 (Report).  
366 <http://www.statistics.gov.hk/pub/B1120017032012XXXXB0100.pdf>, Accessed 4th May 2019.
- 367 4. Sung H, Ferlay J, Siegel RL, Laversanne M, Soerjomataram I, Jemal A, et al. Global Cancer  
368 Statistics 2020: GLOBOCAN Estimates of Incidence and Mortality Worldwide for 36 Cancers  
369 in 185 Countries. *CA: A Cancer Journal for Clinicians*. 2021 2021/05/01;71(3):209-49. doi:  
370 <https://doi.org/10.3322/caac.21660>.
- 371 5. Wang XR, Chiu YL, Qiu H, Au JSK, Yu ITS. The roles of smoking and cooking emissions  
372 in lung cancer risk among Chinese women in Hong Kong. *Annals of Oncology*. 2009  
373 2009/04/01;20(4):746-51. doi: <https://doi.org/10.1093/annonc/mdn699>.
- 374 6. Chiu Y-L, Wang X-R, Qiu H, Yu IT-S. Risk factors for lung cancer: a case-control study in  
375 Hong Kong women. *Cancer Causes & Control*. 2010 2010/05/01;21(5):777-85. doi:  
376 10.1007/s10552-010-9506-9.
- 377 7. Office on S, Health. Publications and Reports of the Surgeon General. Women and  
378 Smoking: A Report of the Surgeon General. Atlanta (GA): Centers for Disease Control and  
379 Prevention (US); 2001.
- 380 8. Escobedo LG, Peddicord JP. Smoking prevalence in US birth cohorts: the influence of gender  
381 and education. *American Journal of Public Health*. 1996 1996/02/01;86(2):231-6. doi:  
382 10.2105/AJPH.86.2.231.
- 383 9. Husten CG, Shelton DM, Chrismon JH, Lin YC, Mowery P, Powell FA. Cigarette smoking  
384 and smoking cessation among older adults: United States, 1965-94. *Tobacco Control*.  
385 1997;6(3):175. doi: 10.1136/tc.6.3.175.
- 386 10. Bolego C, Poli A, Paoletti R. Smoking and gender. *Cardiovascular Research*.  
387 2002;53(3):568-76. doi: 10.1016/S0008-6363(01)00520-X.
- 388 11. Doll R, Hill AB. The mortality of doctors in relation to their smoking habits; a preliminary  
389 report. *Br Med J*. 1954;1(4877):1451-5. PMID: 13160495. doi: 10.1136/bmj.1.4877.1451.
- 390 12. Ramada Rodilla JM, Calvo Cerrada B, Serra Pujadas C, Delclos GL, Benavides FG. Fiber  
391 burden and asbestos-related diseases: an umbrella review. *Gaceta Sanitaria*. 2021 2021/06/11/.  
392 doi: <https://doi.org/10.1016/j.gaceta.2021.04.001>.
- 393 13. Collishaw NE, Kirkbride J, Wigle DT. Tobacco smoke in the workplace: an occupational  
394 health hazard. *Can Med Assoc J*. 1984;131(10):1199-204. PMID: 6498670.
- 395 14. Dresler CM, Fratelli C, Babb J, Everley L, Evans AA, Clapper ML. Gender differences in  
396 genetic susceptibility for lung cancer. *Lung Cancer*. 2000 2000/12/01;30(3):153-60. doi:  
397 [https://doi.org/10.1016/S0169-5002\(00\)00163-X](https://doi.org/10.1016/S0169-5002(00)00163-X).
- 398 15. Alexandrov K, Cascorbi I, Rojas M, Bouvier G, Kriek E, Bartsch H. CYP1A1 and GSTM1  
399 genotypes affect benzo[ a ]pyrene DNA adducts in smokers' lung: comparison with  
400 aromatic/hydrophobic adduct formation. *Carcinogenesis*. 2002;23(12):1969-77. doi:

- 1  
2  
3 401 10.1093/carcin/23.12.1969.
- 4 402 16. Samet JM. Radon and Lung Cancer. JNCI: Journal of the National Cancer Institute.  
5 403 1989;81(10):745-58. doi: 10.1093/jnci/81.10.745.
- 6 404 17. Darby S, Hill D, Auvinen A, Barros-Dios JM, Baysson H, Bochicchio F, et al. Radon in  
7 405 homes and risk of lung cancer: collaborative analysis of individual data from 13 European case-  
8 406 control studies. BMJ. 2005;330(7485):223. doi: 10.1136/bmj.38308.477650.63.
- 9 407 18. Raaschou-Nielsen O, Andersen ZJ, Beelen R, Samoli E, Stafoggia M, Weinmayr G, et al.  
10 408 Air pollution and lung cancer incidence in 17 European cohorts: prospective analyses from the  
11 409 European Study of Cohorts for Air Pollution Effects (ESCAPE). The Lancet Oncology. 2013  
12 410 2013/08/01/;14(9):813-22. doi: [https://doi.org/10.1016/S1470-2045\(13\)70279-1](https://doi.org/10.1016/S1470-2045(13)70279-1).
- 13 411 19. 2018 Summary-20190719. Retrieved August 26, 2022, from  
14 412 [https://www.who.int/docs/default-source/wpro---documents/countries/china/2018-gats-china-](https://www.who.int/docs/default-source/wpro---documents/countries/china/2018-gats-china-factsheet-cn-en.pdf?sfvrsn=3f4e2da9_2)  
15 413 [factsheet-cn-en.pdf?sfvrsn=3f4e2da9\\_2](https://www.who.int/docs/default-source/wpro---documents/countries/china/2018-gats-china-factsheet-cn-en.pdf?sfvrsn=3f4e2da9_2)
- 16 414 20. *Thematic household survey*. Retrieved August 26, 2022, from  
17 415 [https://www.censtatd.gov.hk/en/data/stat\\_report/product/B1130201/att/B11302702020XXXX](https://www.censtatd.gov.hk/en/data/stat_report/product/B1130201/att/B11302702020XXXX)  
18 416 [B0100.pdf](https://www.censtatd.gov.hk/en/data/stat_report/product/B1130201/att/B11302702020XXXX)
- 19 417 21. Abubakar II, Tillmann T, Banerjee A. Global, regional, and national age-sex specific all-  
20 418 cause and cause-specific mortality for 240 causes of death, 1990-2013: a systematic analysis  
21 419 for the Global Burden of Disease Study 2013. Lancet. 2015 Jan 10;385(9963):117-71.
- 22 420 22. Estimated alcohol consumption per capita in Hong Kong. Change4Health. (n.d.).  
23 421 Retrieved December 1, 2022, from  
24 422 [https://www.change4health.gov.hk/en/alcohol\\_aware/figures/alcohol\\_consumption/index.htm](https://www.change4health.gov.hk/en/alcohol_aware/figures/alcohol_consumption/index.htm)  
25 423 1
- 26 424 23. World Health Organization. Global status report on alcohol and health 2018. World  
27 425 Health Organization; 2019 Feb 14.
- 28 426 24. Wild C. World cancer report 2014. Wild CP, Stewart BW, editors. Geneva, Switzerland:  
29 427 World Health Organization; 2014.
- 30 428
- 31 429 25. Zhao S, Dong H, Qin J, Liu H, Li Y, Chen Y, et al. Breast cancer mortality in Chinese  
32 430 women: does migrant status play a role? Annals of Epidemiology. 2019 2019/12/01/;40:28-  
33 431 34.e2. doi: <https://doi.org/10.1016/j.annepidem.2019.10.006>.
- 34 432 26. Gomez SL, Yang J, Lin S-W, McCusker M, Sandler A, Cheng I, et al. Incidence trends of  
35 433 lung cancer by immigration status among Chinese Americans. Cancer Epidemiol Biomarkers  
36 434 Prev. 2015;24(8):1157-64. PMID: 25990553. doi: 10.1158/1055-9965.EPI-15-0123.
- 37 435 27. Hemminki K, Li X, Czene K. Cancer risks in first-generation immigrants to Sweden.  
38 436 International Journal of Cancer. 2002 2002/05/10;99(2):218-28. doi:  
39 437 <https://doi.org/10.1002/ijc.10322>.
- 40 438 28. Vanthomme K, Roskamp M, De Schutter H, Vandenneede H. Lung cancer incidence  
41 439 differences in migrant men in Belgium, 2004–2013: histology-specific analyses. BMC Cancer.  
42 440 2021 2021/03/30;21(1):328. doi: 10.1186/s12885-021-08038-6.
- 43 441 29. Schooling M, Leung GM, Janus ED, Ho SY, Hedley AJ, Lam TH. Childhood migration  
44 442 and cardiovascular risk. International Journal of Epidemiology. 2004;33(6):1219-26. doi:  
45 443 10.1093/ije/dyh221.
- 46 444 30. Leung JYY, Li AM, Leung GM, Schooling CM. Mode of delivery and childhood



- 1  
2  
3 445 hospitalizations for asthma and other wheezing disorders. *Clinical & Experimental Allergy*.  
4 446 2015 2015/06/01;45(6):1109-17. doi: <https://doi.org/10.1111/cea.12548>.  
5  
6 447 31. Baker A, Bray I. Bayesian projections: what are the effects of excluding data from younger  
7 448 age groups?. *American Journal of Epidemiology*. 2005 Oct 15;162(8):798-805.  
8  
9 449 32. Rosenberg PS, Anderson WF. Age-Period-Cohort Models in Cancer Surveillance Research:  
10 450 Ready for Prime Time? APC Models. *Cancer Epidemiology, Biomarkers & Prevention*. 2011  
11 451 Jul 1;20(7):1263-8.  
12 452 33. Holford T. Analyzing the effects of age, period and cohort on incidence and mortality rates.  
13 453 *Stat Meth Med Res*. 1992;1:317-37.  
14 454 34. Brookmeyer R, Stroup DF, editors. *Monitoring the health of populations: statistical*  
15 455 *principles and methods for public health surveillance*. Oxford University Press; 2004.  
16 456 35. Riebler A, Held L. Projecting the future burden of cancer: Bayesian age-period-cohort  
17 457 analysis with integrated nested Laplace approximations. *Biometrical Journal*. 2017  
18 458 May;59(3):531-49.  
19 459 36. Knoll M, Furkel J, Debus J, Abdollahi A, Karch A, Stock C. An R package for an integrated  
20 460 evaluation of statistical approaches to cancer incidence projection. *BMC medical research*  
21 461 *methodology*. 2020 Dec;20(1):1-1.  
22 462 37. Ahmad OB, Boschi-Pinto C, Lopez AD, Murray CJ, Lozano R, Inoue M. Age  
23 463 standardization of rates: a new WHO standard. Geneva: World Health Organization. 2001  
24 464 Jan;9(10):1-4.  
25 465 38. Sung H, Ferlay J, Siegel RL, Laversanne M, Soerjomataram I, Jemal A, Bray F. Global  
26 466 cancer statistics 2020: GLOBOCAN estimates of incidence and mortality worldwide for 36  
27 467 cancers in 185 countries. *CA: a cancer journal for clinicians*. 2021 May;71(3):209-49.  
28 468 39. Mousavi SM, Fallah M, Sundquist K, Hemminki K. Age-and time-dependent changes in  
29 469 cancer incidence among immigrants to Sweden: colorectal, lung, breast and prostate cancers.  
30 470 *International journal of cancer*. 2012 Jul 15;131(2):E122-8.  
31 471 40. National Cancer Institute. SEER stat fact sheets: liver and intrahepatic bile duct cancer.  
32 472 41. Wu X, Chung VC, Hui EP, Ziea ET, Ng BF, Ho RS, Tsoi KK, Wong S, Wu JC.  
33 473 Effectiveness of acupuncture and related therapies for palliative care of cancer: overview of  
34 474 systematic reviews. *Scientific reports*. 2015 Nov 26;5(1):1-5.  
35 475 42. Sung H, Rosenberg PS, Chen WQ, Hartman M, Lim WY, Chia KS, Wai-Kong Mang O,  
36 476 Tse L, Anderson WF, Yang XR. The impact of breast cancer-specific birth cohort effects among  
37 477 younger and older Chinese populations. *International journal of cancer*. 2016 Aug  
38 478 1;139(3):527-34.  
39 479 43. *The world economy volume 1: a millennial perspective, 2, Historical statistics*: Academic  
40 480 Foundation, Gurgaon, India (2007)  
41 481 44. Elias SG, Peeters PH, Grobbee DE, van Noord PA. The 1944-1945 Dutch famine and  
42 482 subsequent overall cancer incidence. *Cancer Epidemiology Biomarkers & Prevention*. 2005  
43 483 Aug;14(8):1981-5.  
44 484 45. Chiu YL, Wang XR, Qiu H, Yu IT. Risk factors for lung cancer: a case-control study in  
45 485 Hong Kong women. *Cancer Causes & Control*. 2010 May;21(5):777-85.  
46 486 46. Li J, Lam AS, Yau ST, Yiu KK, Tsoi KK. Antihypertensive treatments and risks of lung  
47 487 Cancer: A large population-based cohort study in Hong Kong. *BMC cancer*. 2021 Dec;21(1):1-  
48 488 9.

- 1  
2  
3 489 47. Du J, Sun H, Sun Y, Du J, Cao W, Sun S. Assessment of age, period, and cohort effects of  
4 490 lung cancer incidence in Hong Kong and projection up to 2030 based on changing  
5 491 demographics. *American Journal of Cancer Research*. 2021;11(12):5902.  
6 492 48. *Centre for Health Protection, Department of Health - Lung Cancer*. Centre for Health  
7 493 Protection. Retrieved August 10, 2022, from  
8 494 <https://www.chp.gov.hk/en/healthtopics/content/25/49.html>  
9  
10  
11  
12  
13  
14  
15  
16  
17  
18  
19  
20  
21  
22  
23  
24  
25  
26  
27  
28  
29  
30  
31  
32  
33  
34  
35  
36  
37  
38  
39  
40  
41  
42  
43  
44  
45  
46  
47  
48  
49  
50  
51  
52  
53  
54  
55  
56  
57  
58  
59  
60

For peer review only

1  
2 495  
3 496 **Figure 1.** Parameter estimates of age (a), cohort (b) and period (c) effects based on an age-period-cohort model of male  
4 497 and female lung cancer mortality rates by immigrant groups: locals, immigrants stay in Hong Kong for more than 10  
5 498 years and immigrants stay in Hong Kong for less than or equal to 10 years. Age effect was assessed by mortality (left  
6 499 axis). Cohort and period effects were assessed by relative risk (right axis), 95% confidence intervals are shown as  
7 500 shaded bands.  
8 501

9  
10  
11  
12  
13  
14  
15  
16  
17  
18  
19  
20  
21  
22  
23  
24  
25  
26  
27  
28  
29  
30  
31  
32  
33  
34  
35  
36  
37  
38  
39  
40  
41  
42  
43  
44  
45  
46  
47  
48  
49  
50  
51  
52  
53  
54  
55  
56  
57  
58  
59  
60

For peer review only

1  
2 502  
3 503  
4 504  
5 505  
6 506  
7 507  
8  
9  
10  
11  
12  
13  
14  
15  
16  
17  
18  
19  
20  
21  
22  
23  
24  
25  
26  
27  
28  
29  
30  
31  
32  
33  
34  
35  
36  
37  
38  
39  
40  
41  
42  
43  
44  
45  
46  
47  
48  
49  
50  
51  
52  
53  
54  
55  
56  
57  
58  
59  
60

**Figure 2.** Projections of lung cancer mortality rates by gender and immigrant status from 2022 to 2030. Observations are shown as dots with the predictive distribution between the 5% and 95% quantile, whereby each lighter shade of red represents an additional 10% predictive CI. The predictive mean is shown as black solid line and the vertical dashed line indicates where prediction started.

For peer review only

1  
2 508  
3 509  
4 510  
5 511  
6 512  
7 513  
8  
9  
10  
11  
12  
13  
14  
15  
16  
17  
18  
19  
20  
21  
22  
23  
24  
25  
26  
27  
28  
29  
30  
31  
32  
33  
34  
35  
36  
37  
38  
39  
40  
41  
42  
43  
44  
45  
46  
47  
48  
49  
50  
51  
52  
53  
54  
55  
56  
57  
58  
59  
60

**Figure 3.** Projections of lung cancer mortality rates for the population younger than 60 by gender and immigrant status from 2022 to 2030. Observations are shown as dots with the predictive distribution between the 5% and 95% quantile, whereby each lighter shade of red represents an additional 10% predictive CI. The predictive mean is shown as black solid line and the vertical dashed line indicates where prediction started.

For peer review only

1  
2 514  
3 515  
4 516  
5 517  
6 518  
7 519  
8  
9  
10  
11  
12  
13  
14  
15  
16  
17  
18  
19  
20  
21  
22  
23  
24  
25  
26  
27  
28  
29  
30  
31  
32  
33  
34  
35  
36  
37  
38  
39  
40  
41  
42  
43  
44  
45  
46  
47  
48  
49  
50  
51  
52  
53  
54  
55  
56  
57  
58  
59  
60

**Figure 4.** Projections of lung cancer mortality rates for the population older than or equal to 60 by gender and immigrant status from 2022 to 2030. Observations are shown as dots with the predictive distribution between the 5% and 95% quantile, whereby each lighter shade of red represents an additional 10% predictive CI. The predictive mean is shown as black solid line and the vertical dashed line indicates where prediction started.

For peer review only

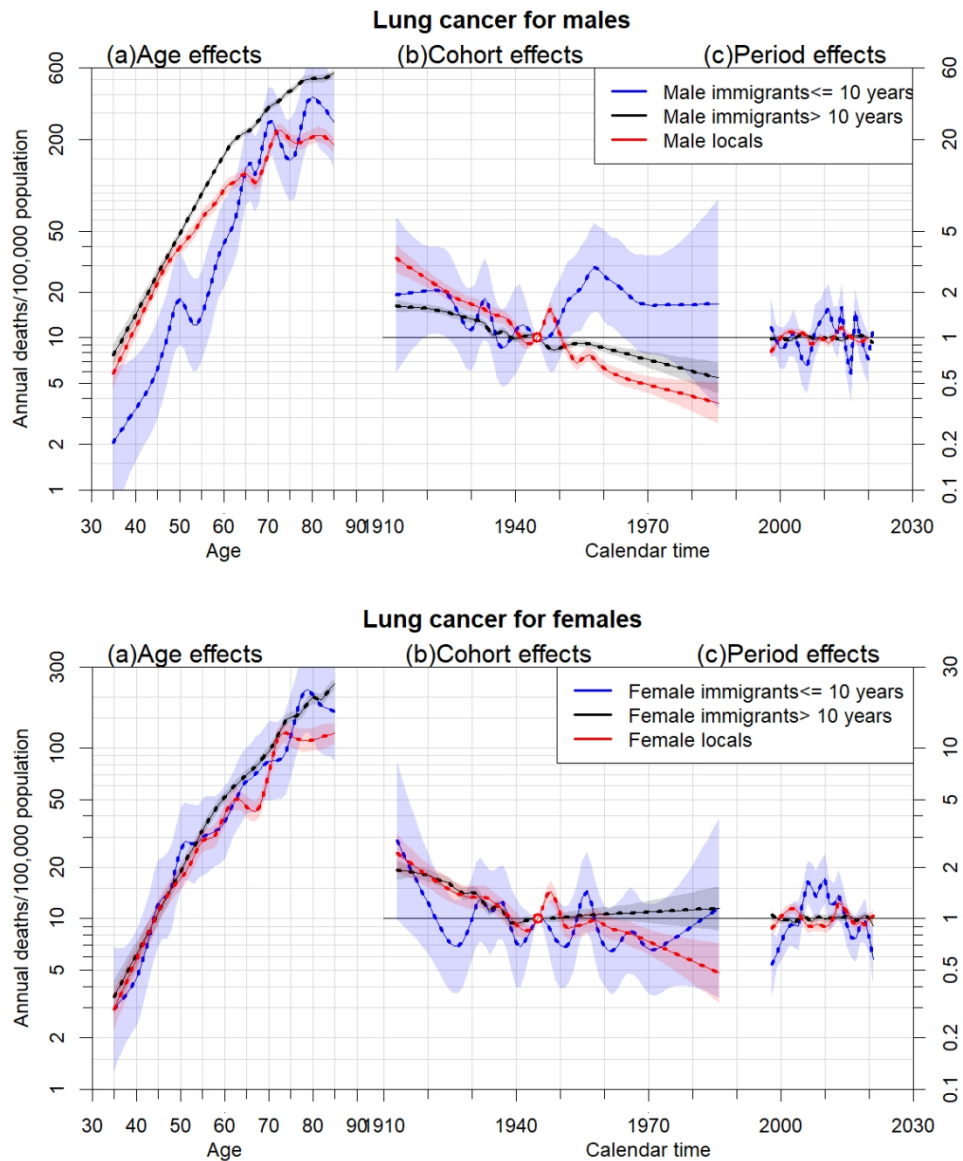

Figure 1. Parameter estimates of age (a), cohort (b) and period (c) effects based on an age-period-cohort model of male and female lung cancer mortality rates by immigrant groups: locals, immigrants stay in Hong Kong for more than 10 years and immigrants stay in Hong Kong for less than or equal to 10 years. Age effect was assessed by mortality (left axis). Cohort and period effects were assessed by relative risk (right axis), 95% confidence intervals are shown as shaded bands.

519x641mm (57 x 57 DPI)

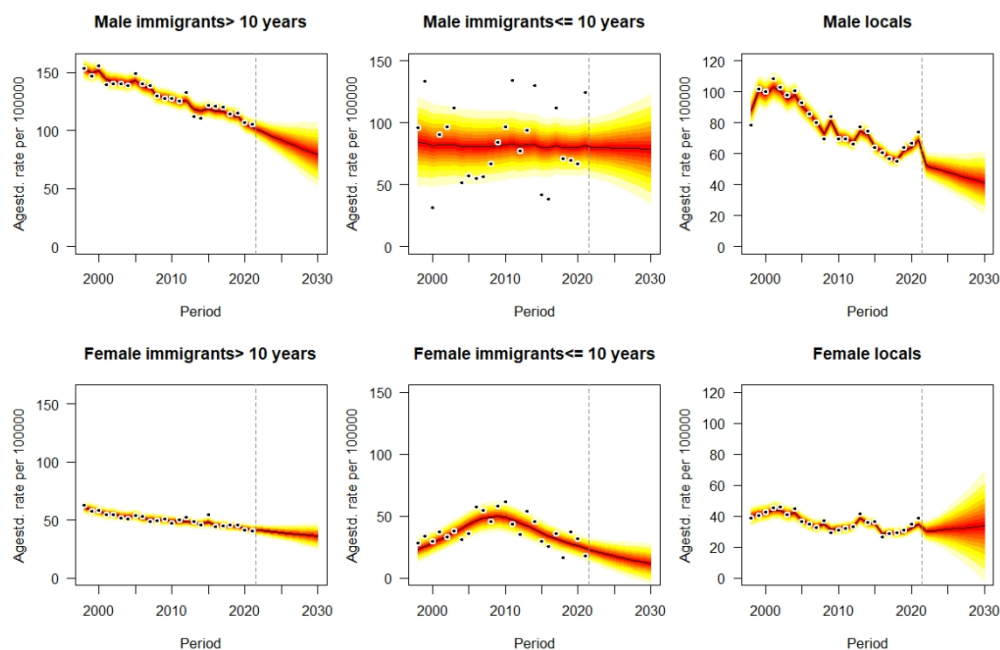

Figure 2. Projections of lung cancer mortality rates by gender and immigrant status from 2022 to 2030. Observations are shown as dots with the predictive distribution between the 5% and 95% quantile, whereby each lighter shade of red represents an additional 10% predictive CI. The predictive mean is shown as black solid line and the vertical dashed line indicates where prediction started.

519x343mm (57 x 57 DPI)



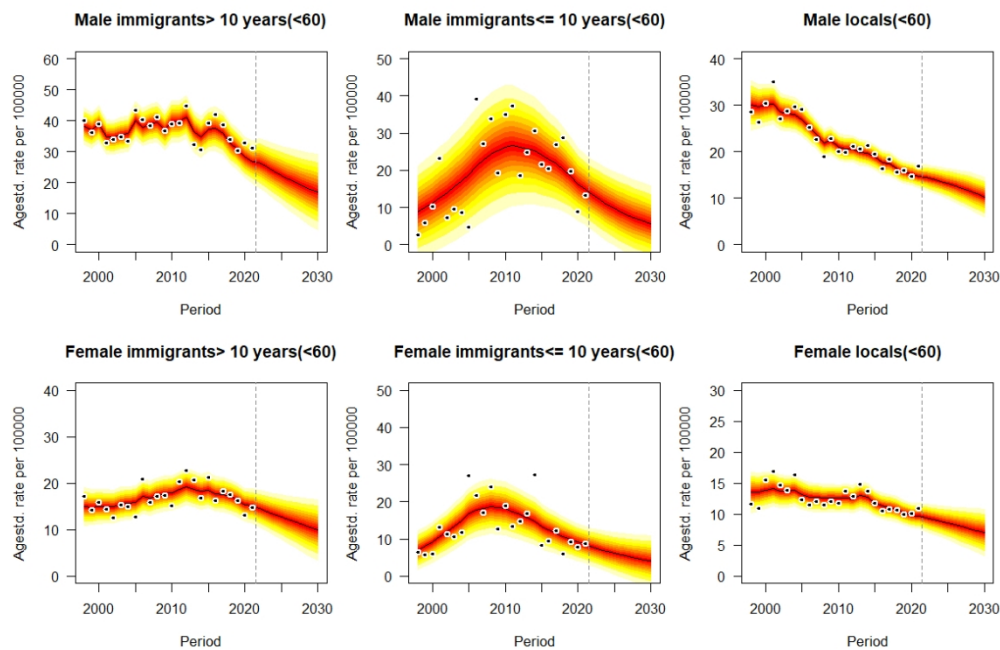

Figure 3. Projections of lung cancer mortality rates for the population younger than 60 by gender and immigrant status from 2022 to 2030. Observations are shown as dots with the predictive distribution between the 5% and 95% quantile, whereby each lighter shade of red represents an additional 10% predictive CI. The predictive mean is shown as black solid line and the vertical dashed line indicates where prediction started.

519x343mm (57 x 57 DPI)

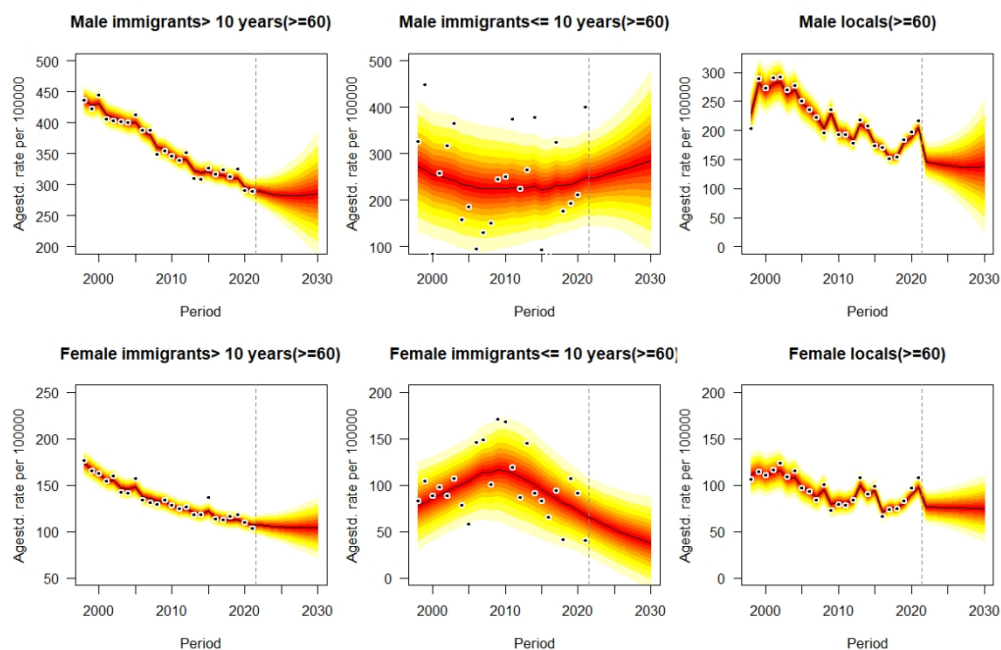

Figure 4. Projections of lung cancer mortality rates for the population older than or equal to 60 by gender and immigrant status from 2022 to 2030. Observations are shown as dots with the predictive distribution between the 5% and 95% quantile, whereby each lighter shade of red represents an additional 10% predictive CI. The predictive mean is shown as black solid line and the vertical dashed line indicates where prediction started.

519x343mm (57 x 57 DPI)

## Supplementary Material for

# “An age-period-cohort analysis and projection of cancer mortality in Hong Kong, 1998–2030”

### APC Figures

|                                      |   |
|--------------------------------------|---|
| eFigure 1(a) Colon cancer .....      | 3 |
| eFigure 1(b) Liver cancer .....      | 4 |
| eFigure 1(c) Pancreatic cancer ..... | 5 |
| eFigure 1(d) Stomach cancer .....    | 6 |
| eFigure 1(e) Prostate cancer .....   | 7 |

### Projection Figures

|                                                 |    |
|-------------------------------------------------|----|
| Colon cancer                                    |    |
| eFigure 2(a)Projection (all ages) .....         | 8  |
| eFigure 2(b)Projection (<60 years) .....        | 9  |
| eFigure 2(c)Projection ( $\geq 60$ years) ..... | 10 |
| Liver cancer                                    |    |
| eFigure 3(a)Projection (all ages) .....         | 11 |
| eFigure 3(b)Projection (<60 years) .....        | 12 |
| eFigure 3(c)Projection ( $\geq 60$ years) ..... | 13 |
| Pancreatic cancer                               |    |
| eFigure 4(a)Projection (all ages) .....         | 14 |
| eFigure 4(b)Projection (<60 years) .....        | 15 |
| eFigure 4(c)Projection ( $\geq 60$ years) ..... | 16 |
| Stomach cancer                                  |    |
| eFigure 5(a)Projection (all ages) .....         | 17 |
| eFigure 5(b)Projection (<60 years) .....        | 18 |

1  
2  
3  
4  
5  
6  
7  
8  
9  
10  
11  
12  
13  
14  
15  
16  
17  
18  
19  
20  
21  
22  
23  
24  
25  
26  
27  
28  
29  
30  
31  
32  
33  
34  
35  
36  
37  
38  
39  
40  
41  
42  
43  
44  
45  
46  
47  
48  
49  
50  
51  
52  
53  
54  
55  
56  
57  
58  
59  
60

eFigure 5(c)Projection ( $\geq 60$  years)..... 19

Prostate cancer

eFigure 6 Projection (all ages,  $<60$  years and  $\geq 60$  years)..... 20

**Tables**

eTable 1 Lung cancer..... 21

eTable 2 Colon cancer..... 22

eTable 3 Liver cancer ..... 23

eTable 4 Pancreatic cancer ..... 24

eTable 5 Stomach cancer ..... 25

eTable 6 Prostate cancer ..... 26

peer review only

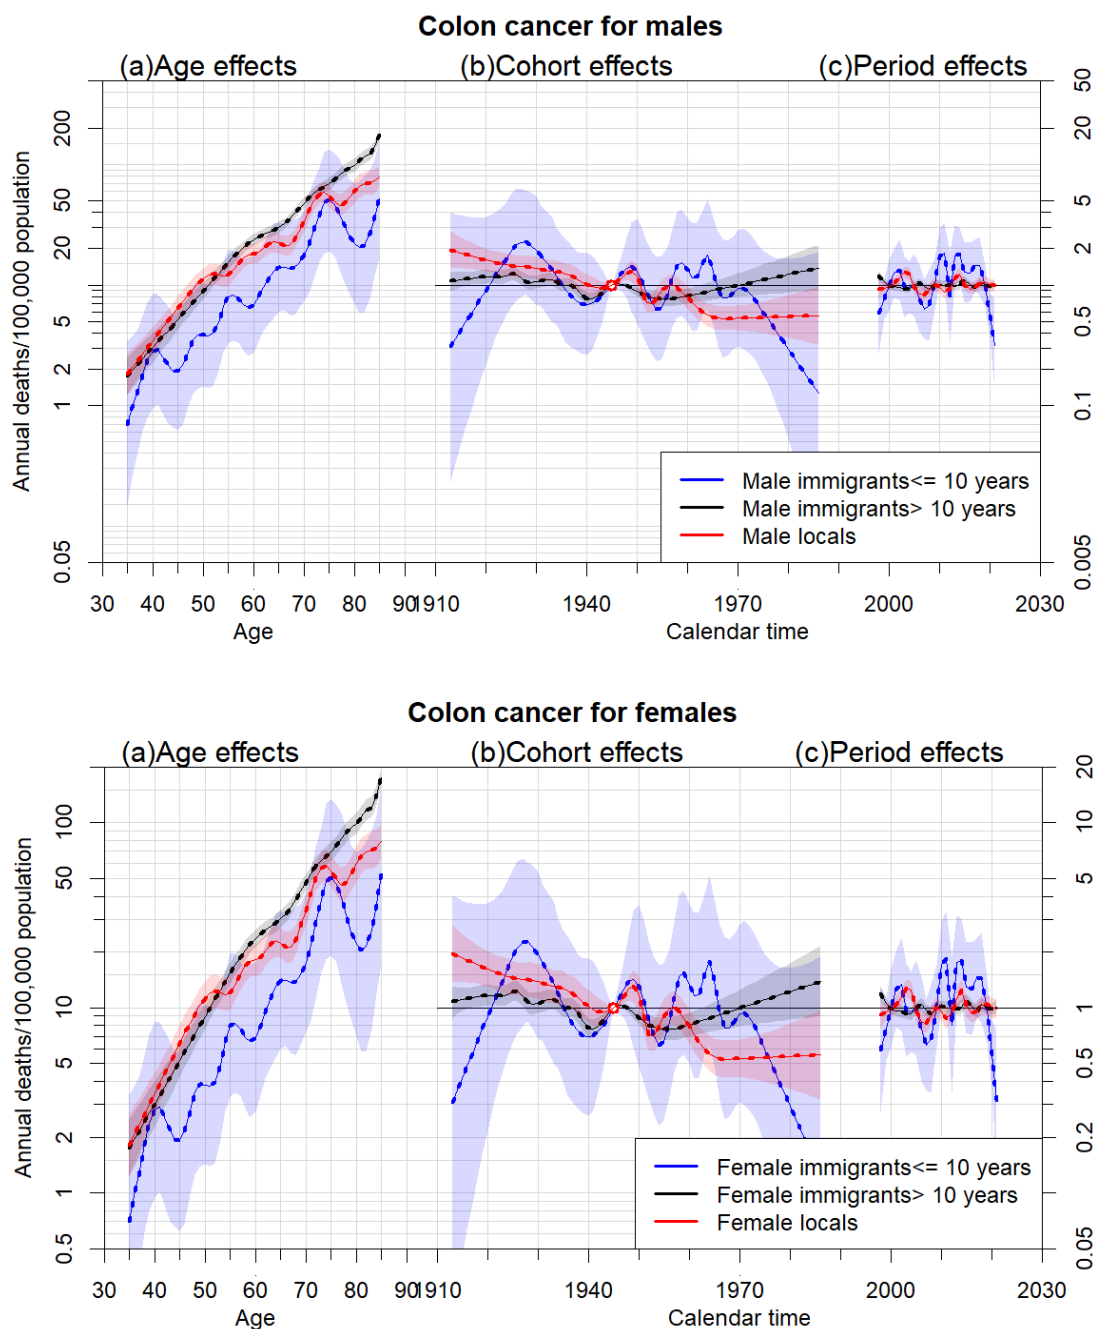

**eFigure 1(a).** Parameter estimates of age (a), cohort (b) and period (c) effects based on an age-period-cohort model of male and female colon cancer mortality rates by immigrant groups: locals, immigrants stay in Hong Kong for more than 10 years and immigrants stay in Hong Kong for less than or equal to 10 years. Age effect was assessed by mortality (left axis). Cohort and period effects were assessed by relative risk (right axis), 95% confidence intervals are shown as shaded bands.

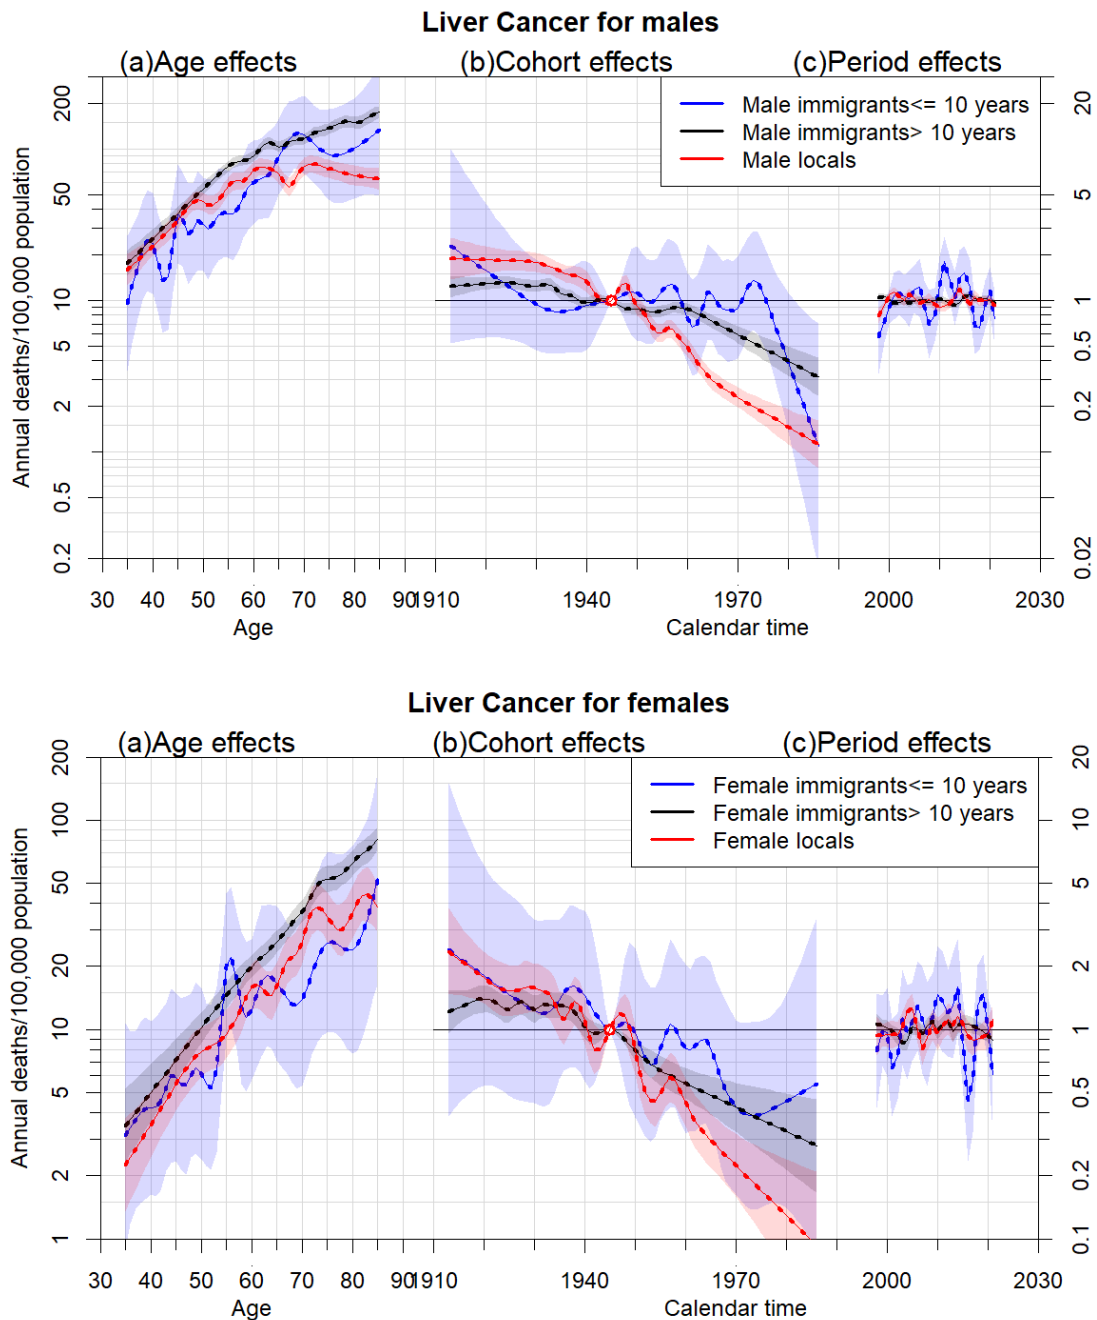

**eFigure 1(b).** Parameter estimates of age (a), cohort (b) and period (c) effects based on an age-period-cohort model of male and female liver cancer mortality rates by immigrant groups: locals, immigrants stay in Hong Kong for more than 10 years and immigrants stay in Hong Kong for less than or equal to 10 years. Age effect was assessed by mortality (left axis). Cohort and period effects were assessed by relative risk (right axis), 95% confidence intervals are shown as shaded bands.

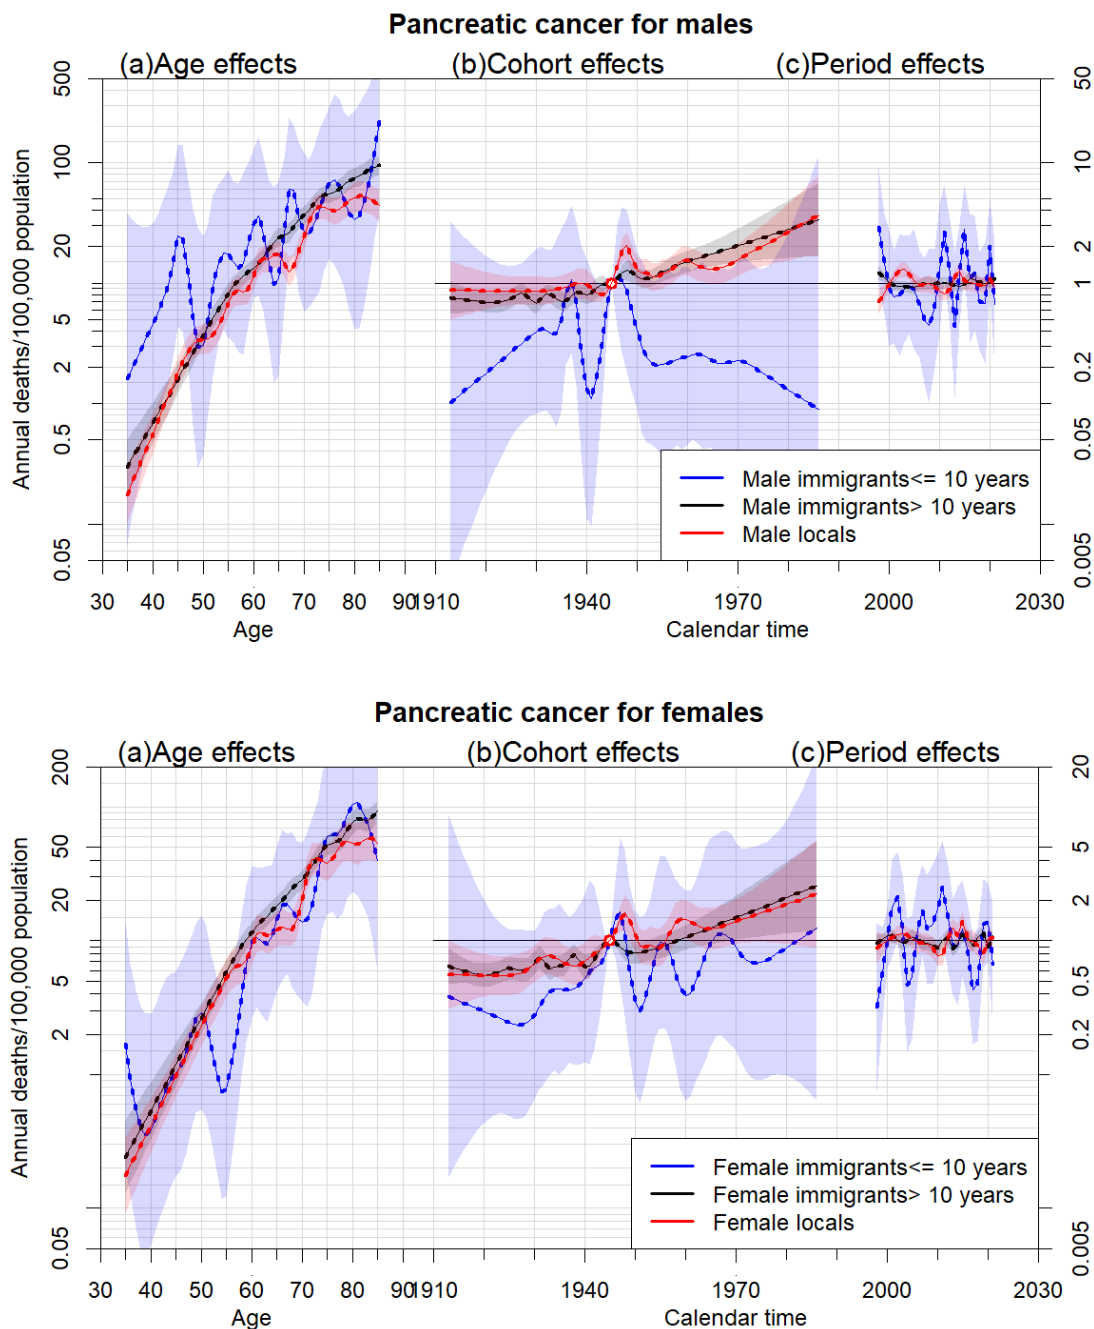

**eFigure 1(c).** Parameter estimates of age (a), cohort (b) and period (c) effects based on an age-period-cohort model of male and female pancreatic cancer mortality rates by immigrant groups: locals, immigrants stay in Hong Kong for more than 10 years and immigrants stay in Hong Kong for less than or equal to 10 years. Age effect was assessed by mortality (left axis). Cohort and period effects were assessed by relative risk (right axis), 95% confidence intervals are shown as shaded bands.

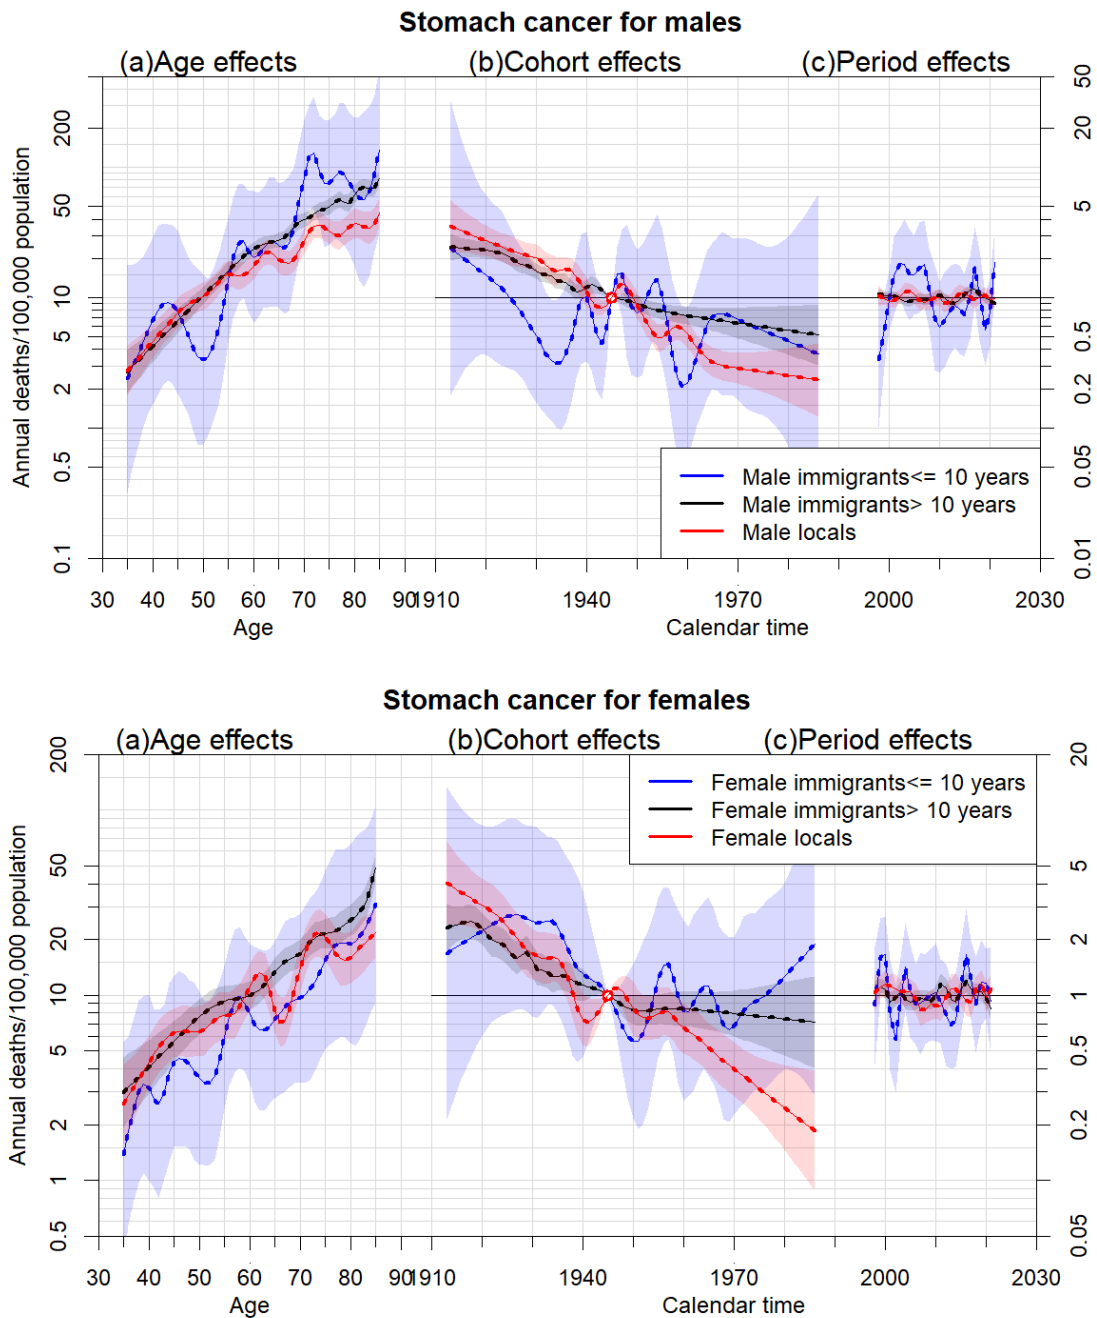

**eFigure 1(d).** Parameter estimates of age (a), cohort (b) and period (c) effects based on an age-period-cohort model of male and female stomach cancer mortality rates by immigrant groups: locals, immigrants stay in Hong Kong for more than 10 years and immigrants stay in Hong Kong for less than or equal to 10 years. Age effect was assessed by mortality (left axis). Cohort and period effects were assessed by relative risk (right axis), 95% confidence intervals are shown as shaded bands.



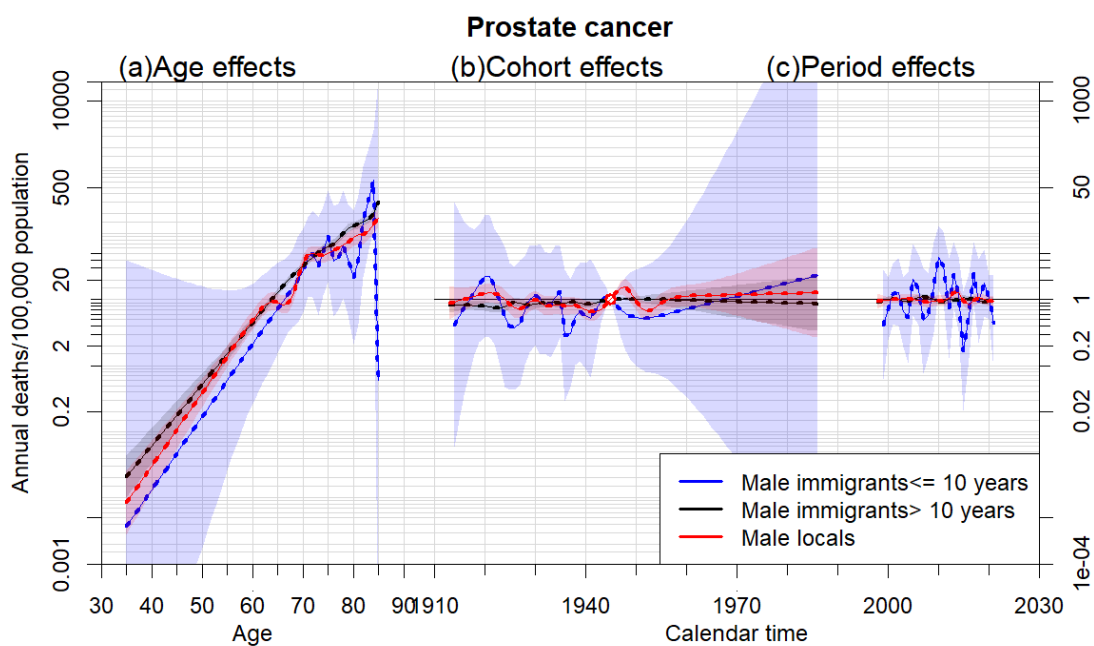

**eFigure 1(e).** Parameter estimates of age (a), cohort (b) and period (c) effects based on an age-period-cohort model of male prostate cancer mortality rates by immigrant groups: locals, immigrants stay in Hong Kong for more than 10 years and immigrants stay in Hong Kong for less than or equal to 10 years. Age effect was assessed by mortality (left axis). Cohort and period effects were assessed by relative risk (right axis), 95% confidence intervals are shown as shaded bands.

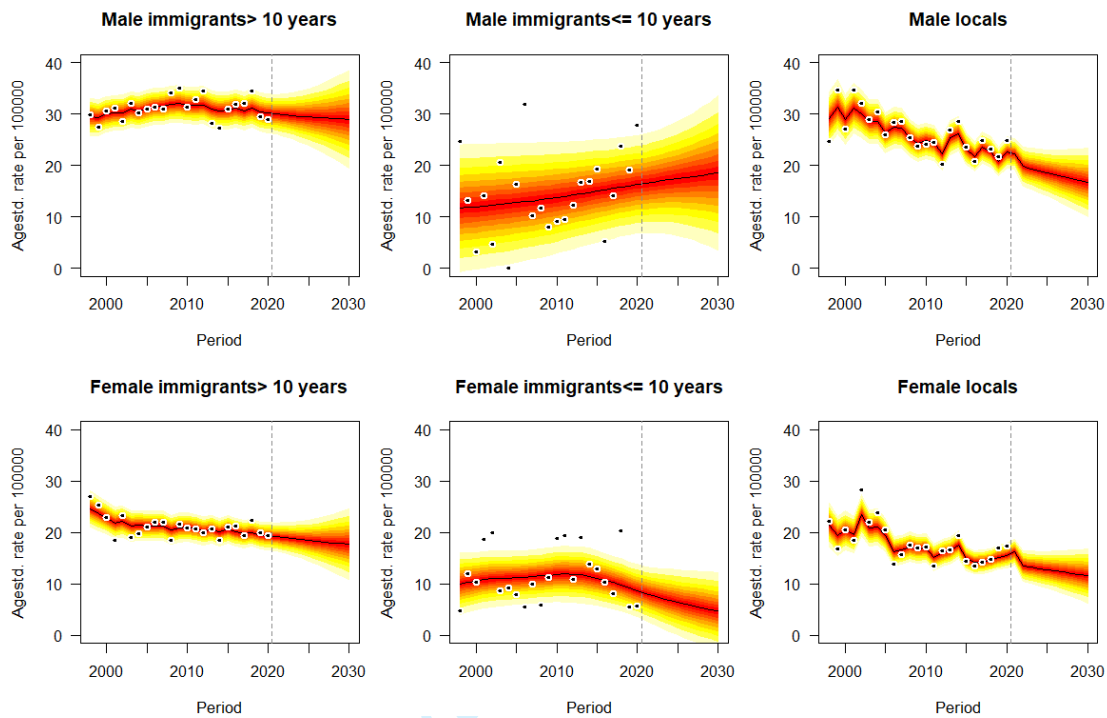

**eFigure 2(a).** Projections of colon cancer mortality rates by gender and immigrant status from 2022 to 2030. Observations are shown as dots with the predictive distribution between the 5% and 95% quantile, whereby each lighter shade of red represents an additional 10% predictive CI. The predictive mean is shown as black solid line and the vertical dashed line indicates where prediction started.

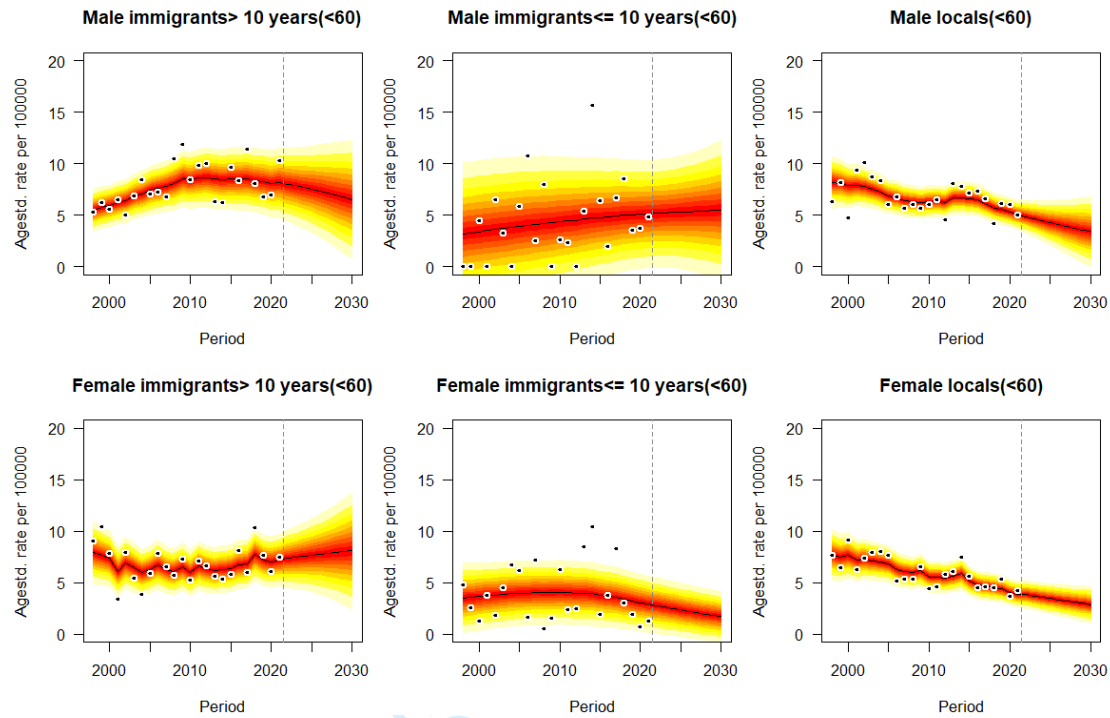

**eFigure 2(b).** Projections of colon cancer mortality rates for the population younger than 60 by gender and immigrant status from 2022 to 2030. Observations are shown as dots with the predictive distribution between the 5% and 95% quantile, whereby each lighter shade of red represents an additional 10% predictive CI. The predictive mean is shown as black solid line and the vertical dashed line indicates where prediction started.

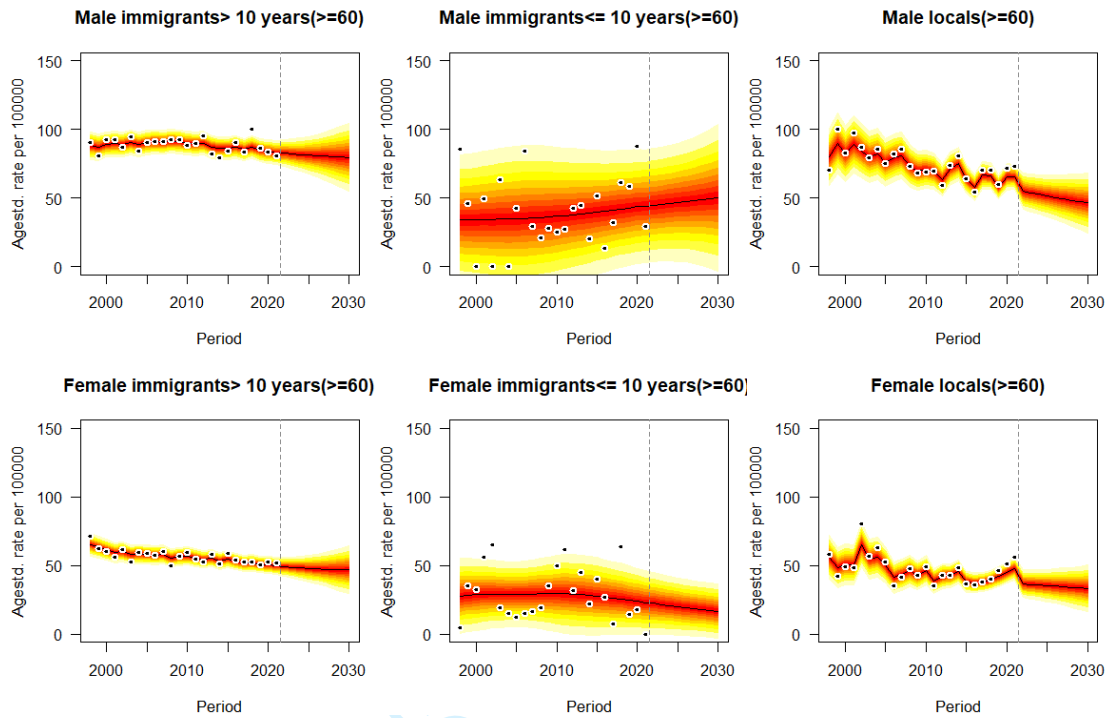

**eFigure 2(c).** Projections of colon cancer mortality rates for the population older than or equal to 60 by gender and immigrant status from 2022 to 2030. Observations are shown as dots with the predictive distribution between the 5% and 95% quantile, whereby each lighter shade of red represents an additional 10% predictive CI. The predictive mean is shown as black solid line and the vertical dashed line indicates where prediction started.

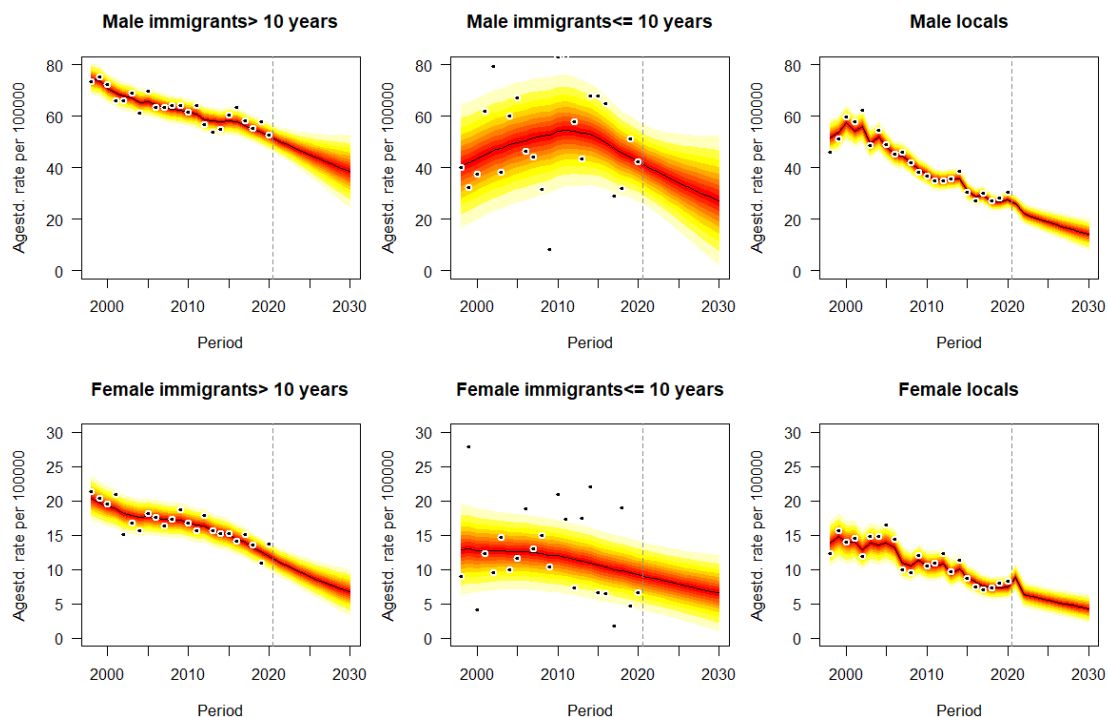

**eFigure 3(a).** Projections of liver cancer mortality rates by gender and immigrant status from 2022 to 2030. Observations are shown as dots with the predictive distribution between the 5% and 95% quantile, whereby each lighter shade of red represents an additional 10% predictive CI. The predictive mean is shown as black solid line and the vertical dashed line indicates where prediction started.

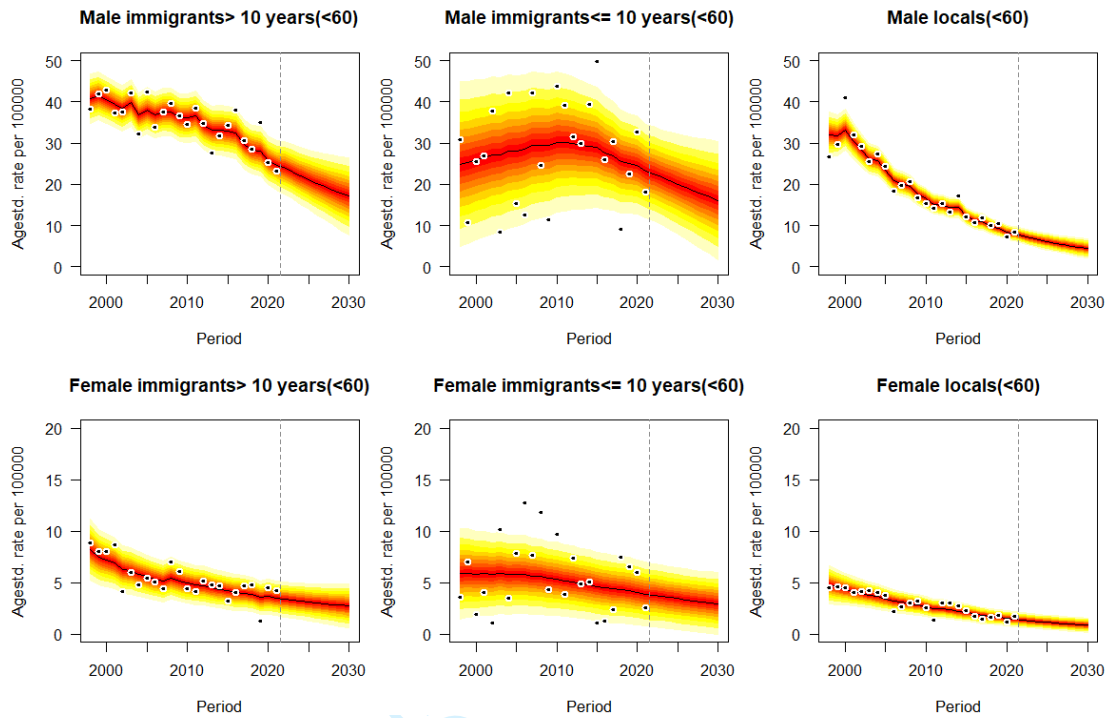

**eFigure 3(b).** Projections of liver cancer mortality rates for the population younger than 60 by gender and immigrant status from 2022 to 2030. Observations are shown as dots with the predictive distribution between the 5% and 95% quantile, whereby each lighter shade of red represents an additional 10% predictive CI. The predictive mean is shown as black solid line and the vertical dashed line indicates where prediction started.

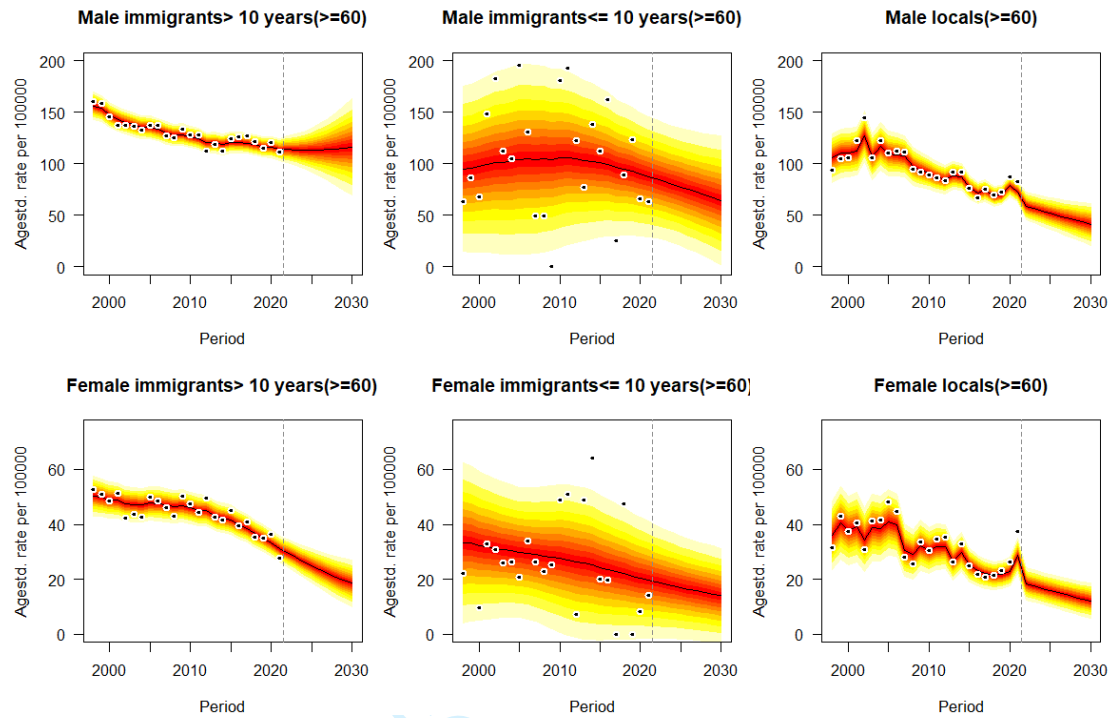

**eFigure 3(c).** Projections of liver cancer mortality rates for the population older than or equal to 60 by gender and immigrant status from 2022 to 2030. Observations are shown as dots with the predictive distribution between the 5% and 95% quantile, whereby each lighter shade of red represents an additional 10% predictive CI. The predictive mean is shown as black solid line and the vertical dashed line indicates where prediction started.

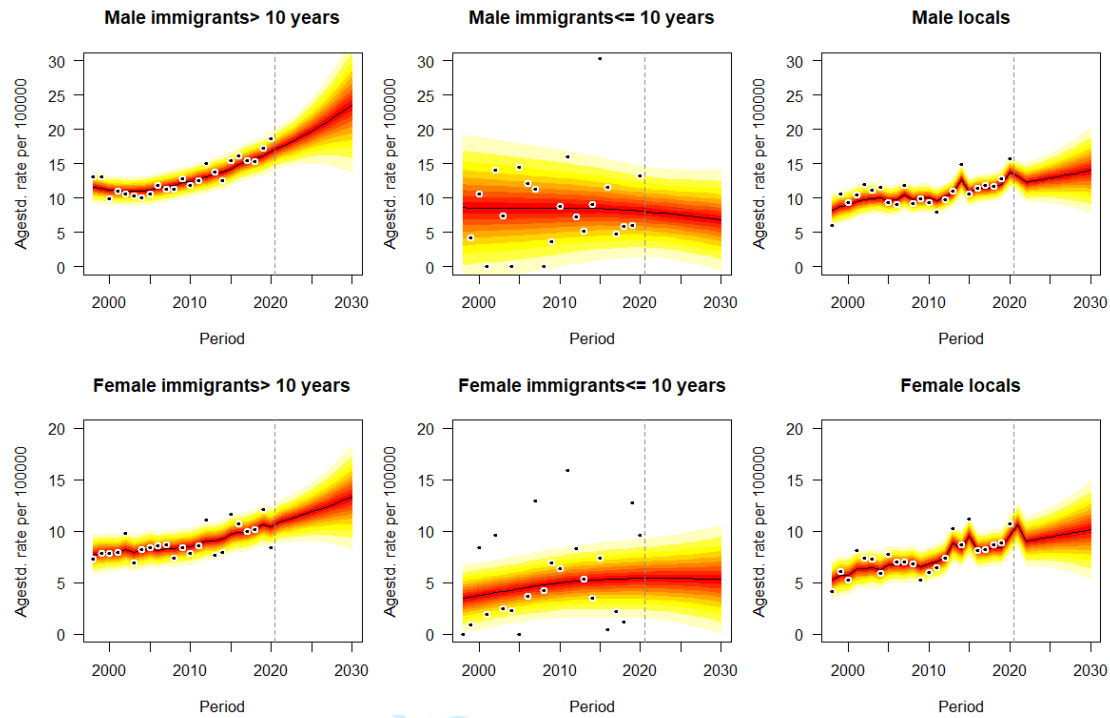

**eFigure 4(a).** Projections of pancreatic cancer mortality rates by gender and immigrant status from 2022 to 2030. Observations are shown as dots with the predictive distribution between the 5% and 95% quantile, whereby each lighter shade of red represents an additional 10% predictive CI. The predictive mean is shown as black solid line and the vertical dashed line indicates where prediction started.



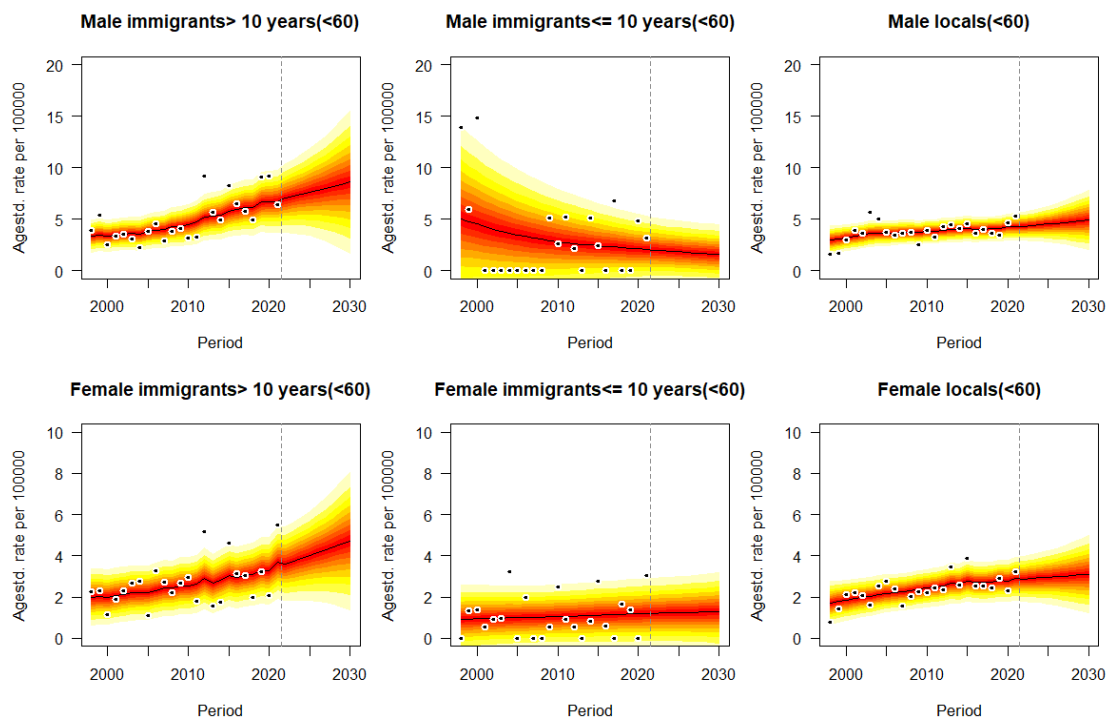

**eFigure 4(b).** Projections of pancreatic cancer mortality rates for the population younger than 60 by gender and immigrant status from 2022 to 2030. Observations are shown as dots with the predictive distribution between the 5% and 95% quantile, whereby each lighter shade of red represents an additional 10% predictive CI. The predictive mean is shown as black solid line and the vertical dashed line indicates where prediction started.

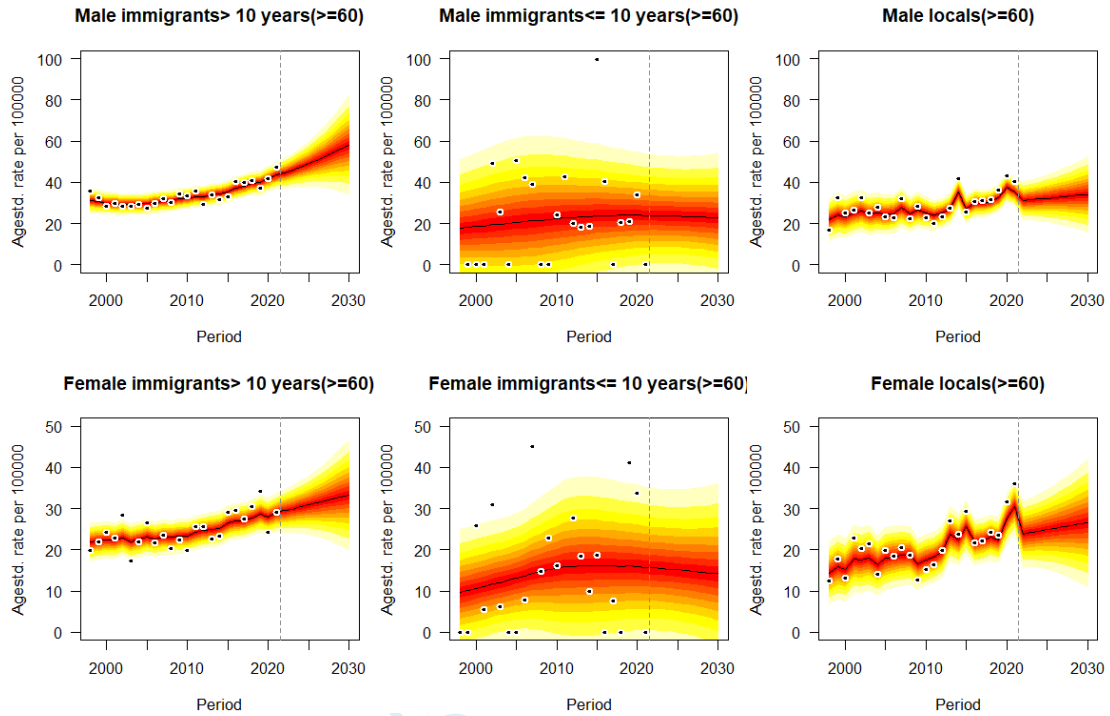

**eFigure 4(c).** Projections of pancreatic cancer mortality rates for the population older than or equal to 60 by gender and immigrant status from 2022 to 2030. Observations are shown as dots with the predictive distribution between the 5% and 95% quantile, whereby each lighter shade of red represents an additional 10% predictive CI. The predictive mean is shown as black solid line and the vertical dashed line indicates where prediction started.

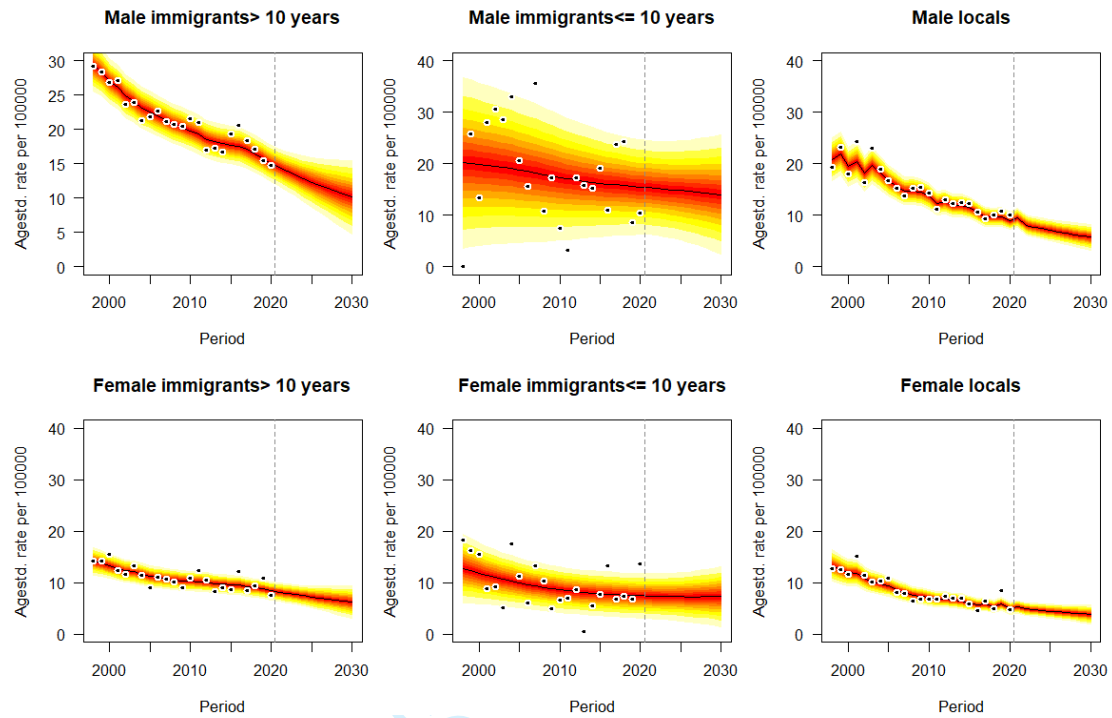

**eFigure 5(a).** Projections of stomach cancer mortality rates by gender and immigrant status from 2022 to 2030. Observations are shown as dots with the predictive distribution between the 5% and 95% quantile, whereby each lighter shade of red represents an additional 10% predictive CI. The predictive mean is shown as black solid line and the vertical dashed line indicates where prediction started.

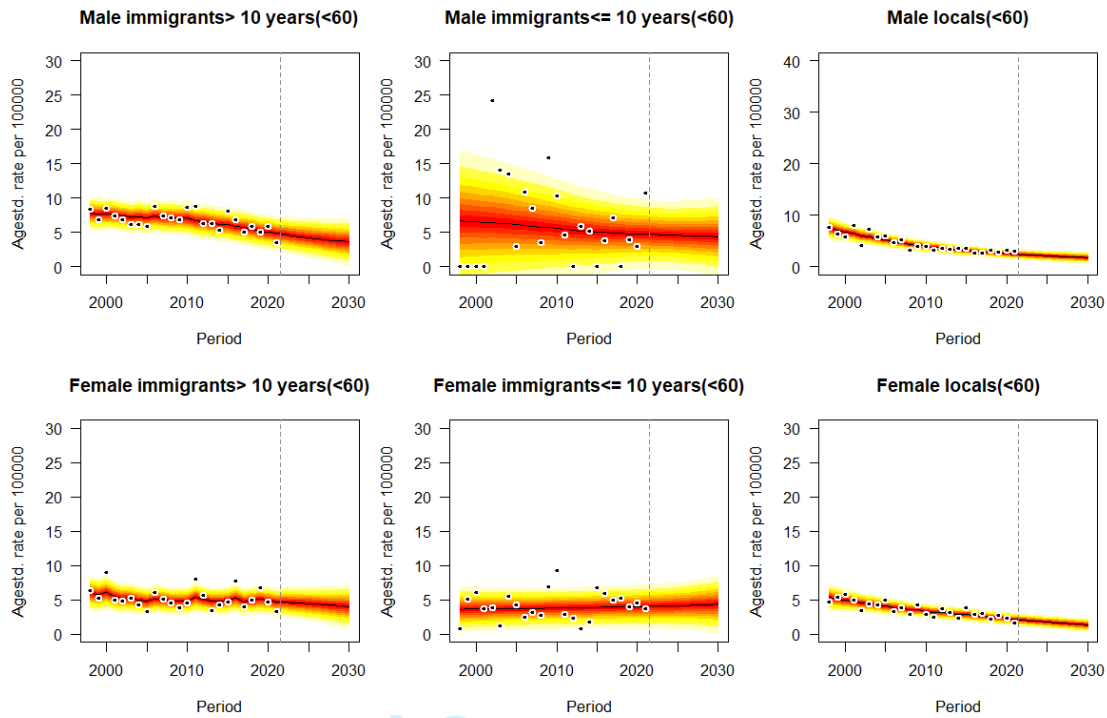

**eFigure 5(b).** Projections of stomach cancer mortality rates for the population younger than 60 by gender and immigrant status from 2022 to 2030. Observations are shown as dots with the predictive distribution between the 5% and 95% quantile, whereby each lighter shade of red represents an additional 10% predictive CI. The predictive mean is shown as black solid line and the vertical dashed line indicates where prediction started.

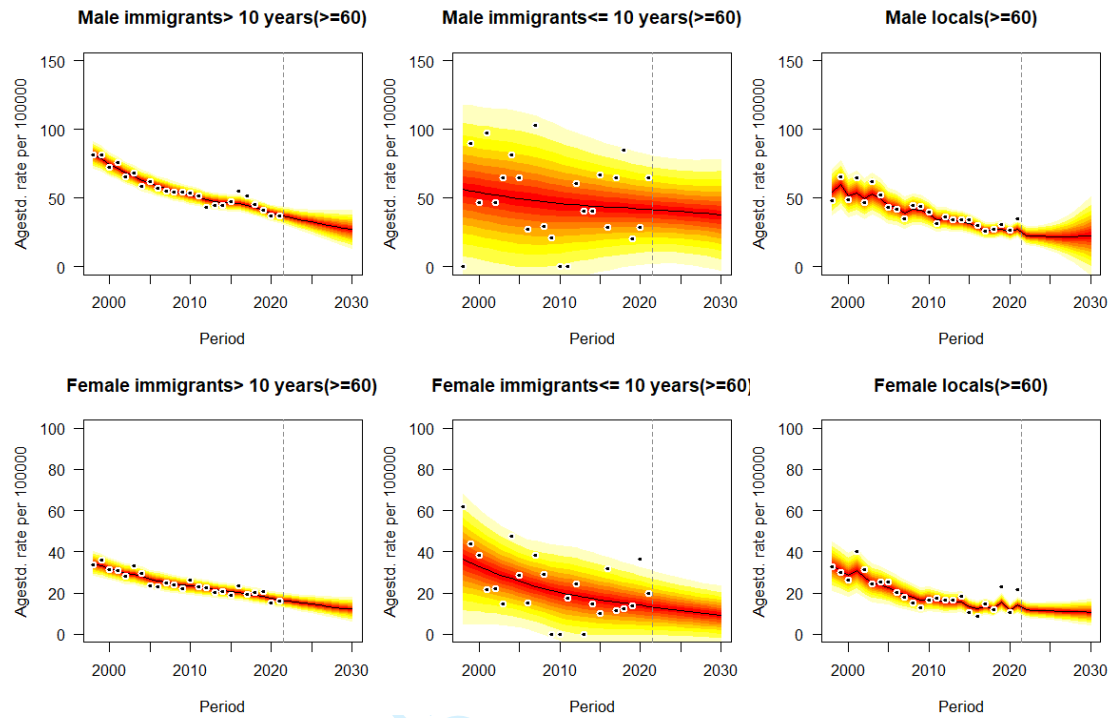

**eFigure 5(c).** Projections of stomach cancer mortality rates for the population older than or equal to 60 by gender and immigrant status from 2022 to 2030. Observations are shown as dots with the predictive distribution between the 5% and 95% quantile, whereby each lighter shade of red represents an additional 10% predictive CI. The predictive mean is shown as black solid line and the vertical dashed line indicates where prediction started.

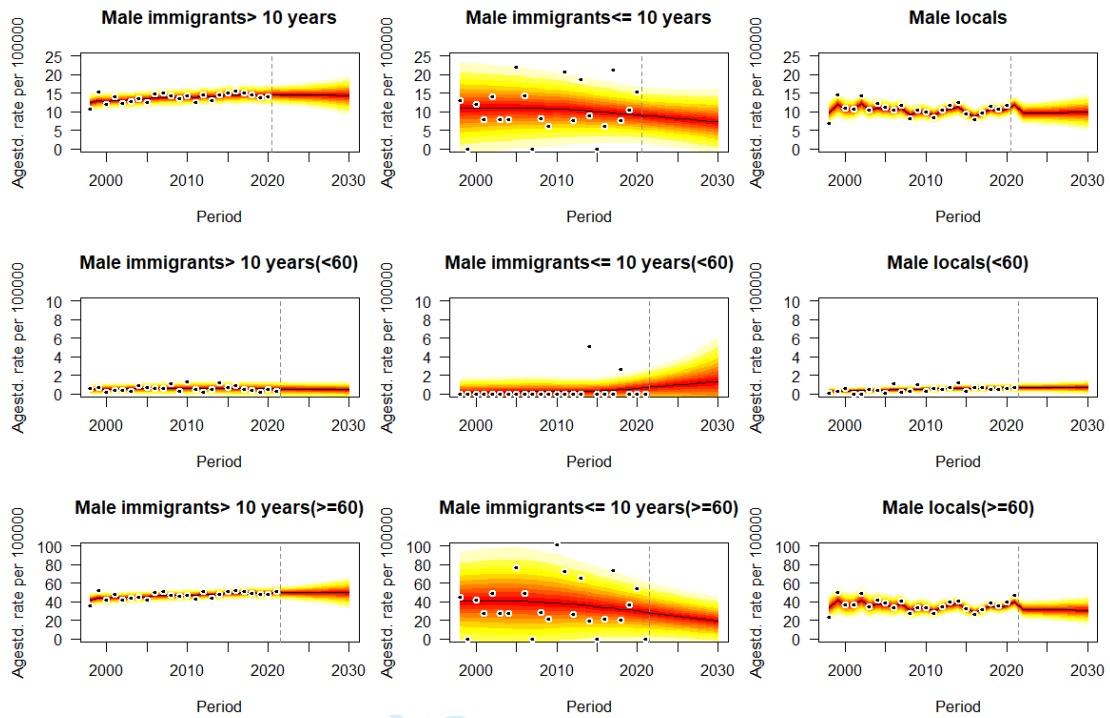

**eFigure 6.** Projections of prostate cancer mortality rates for males by immigrant status and age groups (less than, greater than or equal to 60 years old) from 2022 to 2030. Observations are shown as dots with the predictive distribution between the 5% and 95% quantile, whereby each lighter shade of red represents an additional 10% predictive CI. The predictive mean is shown as black solid line and the vertical dashed line indicates where prediction started.

| Predictive mean of age-standardized mortality rates of lung cancer per 100,000 population |                   |                   |                   |                   |                   |                   |                   |                   |                    |
|-------------------------------------------------------------------------------------------|-------------------|-------------------|-------------------|-------------------|-------------------|-------------------|-------------------|-------------------|--------------------|
| Year                                                                                      | 2022              | 2023              | 2024              | 2025              | 2026              | 2027              | 2028              | 2029              | 2030               |
| Female immigrants >10                                                                     | 41.34<br>(1.86)   | 40.58<br>(2.27)   | 39.87<br>(2.75)   | 39.19<br>(3.28)   | 38.53<br>(3.86)   | 37.89<br>(4.46)   | 37.26<br>(5.09)   | 36.65<br>(5.74)   | 36.04<br>(6.4)     |
| Female immigrants ≤ 10                                                                    | 22.22<br>(4.67)   | 20.56<br>(5.38)   | 19.01<br>(6.10)   | 17.57<br>(6.80)   | 16.24<br>(7.45)   | 15.00<br>(8.04)   | 13.85<br>(8.56)   | 12.79<br>(9.01)   | 11.81<br>(9.39)    |
| Female locals                                                                             | 30.22<br>(3.54)   | 30.63<br>(4.77)   | 31.05<br>(6.38)   | 31.48<br>(8.29)   | 31.9<br>(10.47)   | 32.32<br>(12.87)  | 32.73<br>(15.48)  | 33.15<br>(18.31)  | 33.55<br>(21.33)   |
| Male immigrants >10                                                                       | 100.18<br>(4.18)  | 97.18<br>(5.33)   | 94.34<br>(6.72)   | 91.71<br>(8.24)   | 89.15<br>(9.84)   | 86.66<br>(11.47)  | 84.19<br>(13.11)  | 81.81<br>(14.74)  | 79.55<br>(16.37)   |
| Male immigrants ≤10                                                                       | 79.90<br>(10.41)  | 79.81<br>(11.82)  | 79.72<br>(13.42)  | 79.62<br>(15.19)  | 79.50<br>(17.09)  | 79.32<br>(19.09)  | 79.08<br>(21.18)  | 78.78<br>(23.32)  | 78.41<br>(25.53)   |
| Male locals                                                                               | 52.27<br>(4.86)   | 50.83<br>(5.39)   | 49.56<br>(6.13)   | 48.18<br>(6.97)   | 46.64<br>(7.84)   | 45.13<br>(8.76)   | 43.83<br>(9.76)   | 42.67<br>(10.8)   | 41.43<br>(11.8)    |
| Female immigrants>10(<60y)                                                                | 14.51<br>(1.50)   | 13.90<br>(1.76)   | 13.29<br>(2.04)   | 12.71<br>(2.33)   | 12.13<br>(2.62)   | 11.57<br>(2.91)   | 11.02<br>(3.18)   | 10.49<br>(3.43)   | 9.98(3.68)         |
| Female immigrants ≤ 10(<60y)                                                              | 7.79<br>(1.95)    | 7.18(2.23)        | 6.62(2.53)        | 6.10(2.81)        | 5.63(3.08)        | 5.19(3.32)        | 4.79(3.53)        | 4.42(3.72)        | 4.09(3.88)         |
| Female locals(<60y)                                                                       | 9.48<br>(0.89)    | 9.17(1.02)        | 8.87(1.16)        | 8.57(1.32)        | 8.27(1.49)        | 7.97(1.65)        | 7.68(1.82)        | 7.38(1.98)        | 7.09(2.13)         |
| Male immigrants>10(<60y)                                                                  | 26.36<br>(3.58)   | 24.96<br>(3.94)   | 23.64<br>(4.35)   | 22.38<br>(4.79)   | 21.17<br>(5.23)   | 20.03<br>(5.67)   | 18.96<br>(6.10)   | 17.96<br>(6.51)   | 17.03<br>(6.90)    |
| Male immigrants ≤ 10(<60y)                                                                | 13.38<br>(3.71)   | 12.02<br>(4.17)   | 10.79<br>(4.59)   | 9.68<br>(4.95)    | 8.69<br>(5.24)    | 7.79<br>(5.46)    | 6.98<br>(5.61)    | 6.25<br>(5.69)    | 5.59<br>(5.72)     |
| Male locals(<60y)                                                                         | 14.45<br>(1.15)   | 14.03<br>(1.29)   | 13.61<br>(1.46)   | 13.14<br>(1.64)   | 12.65<br>(1.82)   | 12.13<br>(2.01)   | 11.55<br>(2.17)   | 10.93<br>(2.31)   | 10.26<br>(2.43)    |
| Female immigrants >10(≥ 60y)                                                              | 107.21<br>(5.17)  | 106.26<br>(6.24)  | 105.52<br>(7.54)  | 104.94<br>(9.04)  | 104.51<br>(10.72) | 104.21<br>(12.57) | 104.07<br>(14.61) | 104.06<br>(16.78) | 104.16<br>(19.14)  |
| Female immigrants ≤ 10(≥60y)                                                              | 63.84<br>(15.72)  | 59.88<br>(17.50)  | 56.14<br>(19.31)  | 52.60<br>(21.03)  | 49.27<br>(22.66)  | 46.14<br>(24.16)  | 43.20<br>(25.52)  | 40.44<br>(26.74)  | 37.85<br>(27.81)   |
| Female locals(≥60y)                                                                       | 76.53<br>(10.11)  | 76.22<br>(10.85)  | 75.94<br>(11.79)  | 75.69<br>(12.94)  | 75.49<br>(14.28)  | 75.32<br>(15.80)  | 75.19<br>(17.48)  | 75.10<br>(19.33)  | 75.03<br>(21.32)   |
| Male immigrants>10(≥60y)                                                                  | 289.8<br>(11.7)   | 286.6<br>(15.19)  | 284.28<br>(19.51) | 282.78<br>(24.49) | 281.99<br>(30.07) | 281.88<br>(36.31) | 282.31<br>(43.15) | 283.37<br>(50.66) | 285.03<br>(58.86)  |
| Male immigrants ≤ 10(≥60y)                                                                | 247.01<br>(36.85) | 251.24<br>(42.94) | 255.62<br>(50.06) | 260.14<br>(58.14) | 264.82<br>(67.14) | 269.61<br>(77.01) | 274.52<br>(87.75) | 279.55<br>(99.34) | 284.69<br>(111.81) |
| Male locals(≥60y)                                                                         | 146.29<br>(18.46) | 143.54<br>(20.58) | 141.84<br>(23.97) | 140.07<br>(28.24) | 138.14<br>(33.39) | 136.65<br>(39.82) | 136.49<br>(47.87) | 137.24<br>(57.47) | 138.26<br>(68.52)  |

**eTable 1.** Predictive means and standard deviations (in brackets) of age-standardized mortality rates of lung cancer per 100,000 population for each gender, age group (less than, greater or equal to 60 years old) and immigrant status from 2022 to 2030.

| Predictive mean of age-standardized mortality rates of colon cancer per 100,000 population |                  |                  |                  |                  |                  |                  |                  |                  |                  |
|--------------------------------------------------------------------------------------------|------------------|------------------|------------------|------------------|------------------|------------------|------------------|------------------|------------------|
| Year                                                                                       | 2022             | 2023             | 2024             | 2025             | 2026             | 2027             | 2028             | 2029             | 2030             |
| Female immigrants >10                                                                      | 18.95<br>(1.13)  | 18.77<br>(1.37)  | 18.59<br>(1.66)  | 18.42<br>(1.98)  | 18.27<br>(2.33)  | 18.12<br>(2.71)  | 17.98<br>(3.11)  | 17.85<br>(3.53)  | 17.73<br>(3.96)  |
| Female immigrants ≤ 10                                                                     | 7.70<br>(2.51)   | 7.25<br>(2.81)   | 6.82<br>(3.11)   | 6.42<br>(3.37)   | 6.03<br>(3.61)   | 5.67<br>(3.83)   | 5.33<br>(4.01)   | 5.01<br>(4.17)   | 4.71<br>(4.31)   |
| Female locals                                                                              | 13.47<br>(1.61)  | 13.24<br>(1.72)  | 13.01<br>(1.87)  | 12.77<br>(2.04)  | 12.53<br>(2.24)  | 12.29<br>(2.46)  | 12.06<br>(2.68)  | 11.82<br>(2.92)  | 11.59<br>(3.16)  |
| Male immigrants >10                                                                        | 29.82<br>(1.46)  | 29.66<br>(1.79)  | 29.52<br>(2.19)  | 29.41<br>(2.63)  | 29.30<br>(3.11)  | 29.21<br>(3.64)  | 29.14<br>(4.19)  | 29.06<br>(4.78)  | 28.98<br>(5.39)  |
| Male immigrants ≤10                                                                        | 16.77<br>(3.77)  | 17.02<br>(4.18)  | 17.23<br>(4.64)  | 17.45<br>(5.14)  | 17.67<br>(5.69)  | 17.88<br>(6.27)  | 18.09<br>(6.91)  | 18.31<br>(7.56)  | 18.50<br>(8.26)  |
| Male locals                                                                                | 19.81<br>(2.07)  | 19.39<br>(2.22)  | 18.97<br>(2.42)  | 18.57<br>(2.61)  | 18.18<br>(2.85)  | 17.81<br>(3.12)  | 17.43<br>(3.40)  | 17.06<br>(3.71)  | 16.71<br>(4.03)  |
| Female immigrants >10(<60y)                                                                | 7.36<br>(1.12)   | 7.46<br>(1.28)   | 7.56<br>(1.46)   | 7.65<br>(1.68)   | 7.74<br>(1.92)   | 7.83<br>(2.19)   | 7.92<br>(2.48)   | 8.01<br>(2.79)   | 8.09<br>(3.13)   |
| Female immigrants ≤ 10(<60y)                                                               | 2.82<br>(0.86)   | 2.65<br>(0.91)   | 2.51<br>(0.97)   | 2.36<br>(1.02)   | 2.22<br>(1.07)   | 2.08<br>(1.11)   | 1.95<br>(1.14)   | 1.83<br>(1.18)   | 1.72<br>(1.22)   |
| Female locals(<60y)                                                                        | 3.87<br>(0.50)   | 3.73<br>(0.54)   | 3.61<br>(0.59)   | 3.47<br>(0.65)   | 3.34<br>(0.70)   | 3.22<br>(0.76)   | 3.11<br>(0.82)   | 2.99<br>(0.88)   | 2.88<br>(0.94)   |
| Male immigrants >10(<60y)                                                                  | 7.9<br>(1.17)    | 7.85<br>(1.38)   | 7.71<br>(1.60)   | 7.54(1.83)       | 7.36(2.08)       | 7.17(2.32)       | 6.97(2.57)       | 6.76(2.81)       | 6.55(3.05)       |
| Male immigrants ≤ 10(<60y)                                                                 | 5.18<br>(1.58)   | 5.22<br>(1.75)   | 5.26<br>(1.93)   | 5.30(2.14)       | 5.34(2.36)       | 5.38(2.59)       | 5.43(2.84)       | 5.47(3.11)       | 5.51(3.38)       |
| Male locals(<60y)                                                                          | 4.88<br>(0.63)   | 4.66<br>(0.79)   | 4.46<br>(0.96)   | 4.26(1.13)       | 4.08(1.31)       | 3.91(1.48)       | 3.73(1.65)       | 3.57(1.82)       | 3.42(1.97)       |
| Female immigrants >10(≥60y)                                                                | 49.21<br>(2.99)  | 48.70<br>(3.56)  | 48.26<br>(4.26)  | 47.87<br>(5.05)  | 47.54<br>(5.94)  | 47.26<br>(6.90)  | 47.05<br>(7.94)  | 46.91<br>(9.06)  | 46.81<br>(10.26) |
| Female immigrants ≤ 10(≥60y)                                                               | 22.44<br>(6.56)  | 21.69<br>(6.96)  | 20.95<br>(7.38)  | 20.23<br>(7.80)  | 19.52<br>(8.23)  | 18.84<br>(8.66)  | 18.17<br>(9.08)  | 17.51<br>(9.49)  | 16.86<br>(9.90)  |
| Female locals(≥60y)                                                                        | 36.69<br>(5.74)  | 36.29<br>(6.06)  | 35.87<br>(6.46)  | 35.46<br>(6.95)  | 35.04(7.5)       | 34.61<br>(8.12)  | 34.19<br>(8.79)  | 33.77<br>(9.51)  | 33.34<br>(10.27) |
| Male immigrants >10(≥60y)                                                                  | 82.72<br>(4.09)  | 82.16<br>(4.95)  | 81.64<br>(5.97)  | 81.19<br>(7.12)  | 80.81<br>(8.39)  | 80.47<br>(9.77)  | 80.15<br>(11.24) | 79.85<br>(12.81) | 79.56<br>(14.45) |
| Male immigrants ≤ 10(≥60y)                                                                 | 44.93<br>(13.09) | 45.62<br>(14.52) | 46.30<br>(16.09) | 46.96<br>(17.80) | 47.61<br>(19.64) | 48.25<br>(21.62) | 48.88<br>(23.73) | 49.51<br>(25.97) | 50.13<br>(28.34) |
| Male locals(≥60y)                                                                          | 54.89<br>(7.65)  | 53.75<br>(8.03)  | 52.63<br>(8.52)  | 51.54<br>(9.12)  | 50.47<br>(9.8)   | 49.43<br>(10.55) | 48.42<br>(11.37) | 47.42<br>(12.25) | 46.44<br>(13.16) |

**eTable 2.** Predictive means and standard deviations (in brackets) of age-standardized mortality rates of colon cancer per 100,000 population for each gender, age group (less than, greater or equal to 60 years old) and immigrant status from 2022 to 2030.



| Predictive mean of age-standardized mortality rates of liver cancer per 100,000 population |                  |                  |                  |                   |                   |                   |                   |                   |                   |
|--------------------------------------------------------------------------------------------|------------------|------------------|------------------|-------------------|-------------------|-------------------|-------------------|-------------------|-------------------|
| Year                                                                                       | 2022             | 2023             | 2024             | 2025              | 2026              | 2027              | 2028              | 2029              | 2030              |
| Female immigrants >10                                                                      | 10.68<br>(0.71)  | 10.09<br>(0.85)  | 9.54<br>(1.01)   | 9.01<br>(1.16)    | 8.50<br>(1.31)    | 8.02(1.45)        | 7.57(1.59)        | 7.14(1.72)        | 6.74(1.83)        |
| Female immigrants ≤10                                                                      | 8.66<br>(1.82)   | 8.38<br>(1.95)   | 8.11<br>(2.08)   | 7.84<br>(2.22)    | 7.58<br>(2.36)    | 7.32(2.49)        | 7.07(2.63)        | 6.82(2.76)        | 6.58(2.88)        |
| Female locals                                                                              | 6.36<br>(0.88)   | 6.08<br>(0.90)   | 5.81<br>(0.93)   | 5.53<br>(0.97)    | 5.26<br>(1.01)    | 5.01(1.06)        | 4.77(1.11)        | 4.53(1.15)        | 4.3(1.21)         |
| Male immigrants >10                                                                        | 49.22<br>(2.36)  | 47.76<br>(2.93)  | 46.35<br>(3.59)  | 45.01<br>(4.31)   | 43.67<br>(5.05)   | 42.37<br>(5.81)   | 41.1(6.56)        | 39.89<br>(7.33)   | 38.71<br>(8.08)   |
| Male immigrants ≤10                                                                        | 39.03<br>(6.49)  | 37.39<br>(7.47)  | 35.81<br>(8.51)  | 34.26<br>(9.58)   | 32.76<br>(10.63)  | 31.31<br>(11.65)  | 29.91<br>(12.62)  | 28.56<br>(13.54)  | 27.25<br>(14.40)  |
| Male locals                                                                                | 22.16<br>(2.09)  | 21.02<br>(2.22)  | 19.91<br>(2.39)  | 18.85<br>(2.58)   | 17.83<br>(2.79)   | 16.85<br>(3.03)   | 15.92<br>(3.21)   | 15.03<br>(3.40)   | 14.18<br>(3.59)   |
| Female immigrants >10(<60y)                                                                | 3.39<br>(0.52)   | 3.29<br>(0.57)   | 3.20<br>(0.63)   | 3.12<br>(0.69)    | 3.04<br>(0.75)    | 2.96(0.82)        | 2.89(0.89)        | 2.82(0.96)        | 2.75(1.03)        |
| Female immigrants ≤10(<60y)                                                                | 3.81<br>(0.91)   | 3.69<br>(0.96)   | 3.57<br>(1.02)   | 3.46<br>(1.08)    | 3.36<br>(1.15)    | 3.25(1.22)        | 3.15(1.29)        | 3.06(1.36)        | 2.97(1.43)        |
| Female locals(<60y)                                                                        | 1.37<br>(0.2)    | 1.29<br>(0.21)   | 1.22<br>(0.23)   | 1.16<br>(0.24)    | 1.10<br>(0.26)    | 1.04(0.27)        | 0.99(0.29)        | 0.94(0.30)        | 0.89(0.31)        |
| Male immigrants >10(<60y)                                                                  | 24.04<br>(2.35)  | 23.02<br>(2.63)  | 22.05<br>(2.94)  | 21.13<br>(3.27)   | 20.25<br>(3.61)   | 19.41<br>(3.95)   | 18.62<br>(4.30)   | 17.86<br>(4.64)   | 17.14<br>(4.98)   |
| Male immigrants ≤10(<60y)                                                                  | 22.56<br>(3.96)  | 21.71<br>(4.44)  | 20.87<br>(4.94)  | 20.04<br>(5.45)   | 19.22<br>(5.95)   | 18.42<br>(6.45)   | 17.63<br>(6.91)   | 16.86<br>(7.36)   | 16.11<br>(7.78)   |
| Male locals(<60y)                                                                          | 7.47<br>(0.74)   | 6.97<br>(0.79)   | 6.52<br>(0.86)   | 6.11<br>(0.93)    | 5.73<br>(1.01)    | 5.38(1.08)        | 5.04(1.15)        | 4.73(1.21)        | 4.44(1.27)        |
| Female immigrants >10(≥60y)                                                                | 29.63<br>(2.01)  | 27.99<br>(2.36)  | 26.42<br>(2.75)  | 24.92<br>(3.14)   | 23.49<br>(3.52)   | 22.13<br>(3.88)   | 20.85<br>(4.23)   | 19.64<br>(4.55)   | 18.50<br>(4.85)   |
| Female immigrants ≤10(≥60y)                                                                | 19.08<br>(5.81)  | 18.38<br>(6.14)  | 17.71<br>(6.48)  | 17.03<br>(6.83)   | 16.39<br>(7.16)   | 15.76<br>(7.49)   | 15.16<br>(7.80)   | 14.57<br>(8.11)   | 14.01<br>(8.39)   |
| Female locals(≥60y)                                                                        | 18.41<br>(3.23)  | 17.55<br>(3.26)  | 16.72<br>(3.32)  | 15.91<br>(3.40)   | 15.11<br>(3.49)   | 14.34<br>(3.59)   | 13.59<br>(3.69)   | 12.87<br>(3.81)   | 12.17<br>(3.93)   |
| Male immigrants >10(≥60y)                                                                  | 113.96<br>(5.95) | 113.43<br>(7.65) | 113.17<br>(9.70) | 113.16<br>(12.04) | 113.37<br>(14.66) | 113.79<br>(17.56) | 114.39<br>(20.73) | 115.19<br>(24.18) | 116.17<br>(27.91) |
| Male immigrants ≤10(≥60y)                                                                  | 85.14<br>(18.85) | 82.59<br>(20.6)  | 80.02<br>(22.44) | 77.42<br>(24.34)  | 74.83<br>(26.24)  | 72.23<br>(28.12)  | 69.64<br>(29.94)  | 67.07<br>(31.70)  | 64.52<br>(33.38)  |
| Male locals(≥60y)                                                                          | 58.95<br>(7.91)  | 56.51<br>(8.20)  | 54.14<br>(8.61)  | 51.84<br>(9.12)   | 49.61<br>(9.70)   | 47.46<br>(10.33)  | 45.38<br>(11.01)  | 43.38<br>(11.68)  | 41.45(12.36)      |

**eTable 3.** Predictive means and standard deviations (in brackets) of age-standardized mortality rates of liver cancer per 100,000 population for each gender, age group (less than, greater or equal to 60 years old) and immigrant status from 2022 to 2030.

| Predictive mean of age-standardized mortality rates of pancreatic cancer per 100,000 population |                 |                 |                  |                  |                  |                  |                  |                  |                  |
|-------------------------------------------------------------------------------------------------|-----------------|-----------------|------------------|------------------|------------------|------------------|------------------|------------------|------------------|
| Year                                                                                            | 2022            | 2023            | 2024             | 2025             | 2026             | 2027             | 2028             | 2029             | 2030             |
| Female immigrants >10                                                                           | 11.11<br>(0.75) | 11.36<br>(0.91) | 11.61<br>(1.09)  | 11.87<br>(1.31)  | 12.14<br>(1.56)  | 12.42<br>(1.84)  | 12.71<br>(2.15)  | 13.01<br>(2.48)  | 13.3(2.85)       |
| Female immigrants ≤ 10                                                                          | 5.44<br>(1.56)  | 5.44<br>(1.69)  | 5.43(1.84)       | 5.42(1.99)       | 5.41(2.15)       | 5.39(2.32)       | 5.36(2.49)       | 5.34(2.66)       | 5.31(2.84)       |
| Female locals                                                                                   | 9.01<br>(1.22)  | 9.15<br>(1.34)  | 9.29(1.48)       | 9.43(1.64)       | 9.57(1.83)       | 9.71(2.05)       | 9.85(2.28)       | 9.99(2.54)       | 10.14<br>(2.83)  |
| Male immigrants >10                                                                             | 17.87<br>(1.19) | 18.48<br>(1.49) | 19.11<br>(1.87)  | 19.78<br>(2.32)  | 20.47<br>(2.83)  | 21.18<br>(3.42)  | 21.92<br>(4.07)  | 22.69<br>(4.81)  | 23.49<br>(5.61)  |
| Male immigrants ≤10                                                                             | 7.87<br>(2.37)  | 7.76<br>(2.53)  | 7.64(2.70)       | 7.51(2.87)       | 7.38(3.05)       | 7.24(3.23)       | 7.09(3.41)       | 6.95(3.58)       | 6.81(3.75)       |
| Male locals                                                                                     | 12.29<br>(1.49) | 12.49<br>(1.64) | 12.69<br>(1.83)  | 12.91<br>(2.06)  | 13.11<br>(2.33)  | 13.33<br>(2.63)  | 13.55<br>(2.97)  | 13.78<br>(3.34)  | 14.02<br>(3.74)  |
| Female immigrants >10(<60y)                                                                     | 3.62<br>(0.57)  | 3.74<br>(0.66)  | 3.87(0.77)       | 4.01(0.89)       | 4.14(1.02)       | 4.28(1.18)       | 4.42(1.34)       | 4.57(1.53)       | 4.72(1.73)       |
| Female immigrants ≤ 10(<60y)                                                                    | 1.21<br>(0.48)  | 1.22<br>(0.52)  | 1.23(0.56)       | 1.24(0.61)       | 1.25(0.66)       | 1.26(0.71)       | 1.26(0.77)       | 1.27(0.83)       | 1.28(0.89)       |
| Female locals(<60y)                                                                             | 2.88<br>(0.36)  | 2.91<br>(0.41)  | 2.93(0.48)       | 2.96(0.55)       | 2.99(0.63)       | 3.02(0.71)       | 3.04(0.81)       | 3.07(0.90)       | 3.10(1.01)       |
| Male immigrants >10(<60y)                                                                       | 7.05<br>(1.11)  | 7.24<br>(1.32)  | 7.43(1.56)       | 7.62(1.84)       | 7.82(2.16)       | 8.01(2.50)       | 8.21(2.88)       | 8.40(3.30)       | 8.61(3.75)       |
| Male immigrants ≤ 10(<60y)                                                                      | 2.01<br>(0.85)  | 1.95<br>(0.91)  | 1.9(0.94)        | 1.84(0.99)       | 1.79(1.04)       | 1.74(1.09)       | 1.69(1.14)       | 1.64(1.19)       | 1.60(1.24)       |
| Male locals(<60y)                                                                               | 4.33<br>(0.48)  | 4.41<br>(0.57)  | 4.46(0.68)       | 4.53(0.81)       | 4.61(0.94)       | 4.69(1.09)       | 4.77(1.26)       | 4.85(1.44)       | 4.93(1.63)       |
| Female immigrants >10(≥60y)                                                                     | 29.45<br>(2.11) | 29.91<br>(2.54) | 30.38<br>(3.06)  | 30.85<br>(3.66)  | 31.33<br>(4.33)  | 31.81<br>(5.08)  | 32.29<br>(5.91)  | 32.78<br>(6.79)  | 33.27<br>(7.74)  |
| Female immigrants ≤ 10(≥60y)                                                                    | 15.65<br>(6.08) | 15.49<br>(6.71) | 15.33<br>(7.36)  | 15.16<br>(8.03)  | 14.97<br>(8.73)  | 14.79<br>(9.43)  | 14.59<br>(10.14) | 14.39<br>(10.86) | 14.19<br>(11.58) |
| Female locals(≥60y)                                                                             | 23.85<br>(4.46) | 24.21<br>(4.81) | 24.56<br>(5.23)  | 24.91<br>(5.73)  | 25.25<br>(6.30)  | 25.58<br>(6.95)  | 25.90<br>(7.67)  | 26.22<br>(8.47)  | 26.54<br>(9.34)  |
| Male immigrants >10(≥60y)                                                                       | 44.36<br>(3.02) | 45.85<br>(3.76) | 47.41<br>(4.69)  | 49.04<br>(5.78)  | 50.73<br>(7.05)  | 52.48<br>(8.50)  | 54.28<br>(10.13) | 56.16<br>(11.95) | 58.11<br>(13.98) |
| Male immigrants ≤ 10(≥60y)                                                                      | 23.96<br>(9.01) | 23.87<br>(9.74) | 23.75<br>(10.52) | 23.61<br>(11.33) | 23.45<br>(12.17) | 23.28<br>(13.04) | 23.09<br>(13.93) | 22.89<br>(14.83) | 22.68<br>(15.75) |
| Male locals(≥60y)                                                                               | 31.17<br>(5.22) | 31.55<br>(5.63) | 31.93<br>(6.14)  | 32.30<br>(6.75)  | 32.66<br>(7.45)  | 33.01<br>(8.23)  | 33.35<br>(9.11)  | 33.69<br>(10.08) | 34.03<br>(11.12) |

**eTable 4.** Predictive means and standard deviations (in brackets) of age-standardized mortality rates of pancreatic cancer per 100,000 population for each gender, age group (less than, greater or equal to 60 years old) and immigrant status from 2022 to 2030.

| Predictive mean of age-standardized mortality rates of stomach cancer per 100,000 population |                  |                  |                  |                  |                  |                  |                  |                  |                  |
|----------------------------------------------------------------------------------------------|------------------|------------------|------------------|------------------|------------------|------------------|------------------|------------------|------------------|
| Year                                                                                         | 2022             | 2023             | 2024             | 2025             | 2026             | 2027             | 2028             | 2029             | 2030             |
| Female immigrants >10                                                                        | 7.95<br>(0.62)   | 7.71<br>(0.74)   | 7.47<br>(0.87)   | 7.25<br>(1.01)   | 7.03<br>(1.15)   | 6.83<br>(1.29)   | 6.62<br>(1.43)   | 6.43<br>(1.57)   | 6.24<br>(1.71)   |
| Female immigrants ≤10                                                                        | 7.36<br>(1.56)   | 7.33<br>(1.69)   | 7.30<br>(1.85)   | 7.28<br>(2.01)   | 7.27<br>(2.20)   | 7.27<br>(2.40)   | 7.28<br>(2.61)   | 7.31<br>(2.84)   | 7.33<br>(3.09)   |
| Female locals                                                                                | 4.91<br>(0.52)   | 4.75<br>(0.57)   | 4.61<br>(0.63)   | 4.47<br>(0.71)   | 4.34<br>(0.77)   | 4.21<br>(0.84)   | 4.08<br>(0.91)   | 3.95<br>(0.99)   | 3.83<br>(1.06)   |
| Male immigrants >10                                                                          | 13.89<br>(0.97)  | 13.34(1.21)      | 12.81<br>(1.46)  | 12.31<br>(1.73)  | 11.83<br>(1.99)  | 11.38<br>(2.26)  | 10.95<br>(2.51)  | 10.54<br>(2.76)  | 10.15<br>(3.01)  |
| Male immigrants ≤10                                                                          | 15.21<br>(3.38)  | 15.07<br>(3.67)  | 14.93<br>(3.98)  | 14.79<br>(4.31)  | 14.64<br>(4.65)  | 14.51<br>(5.02)  | 14.35<br>(5.39)  | 14.19<br>(5.78)  | 14.03<br>(6.17)  |
| Male locals                                                                                  | 8.07<br>(0.99)   | 7.73<br>(1.03)   | 7.41(1.07)       | 7.10<br>(1.13)   | 6.81<br>(1.19)   | 6.51<br>(1.26)   | 6.23<br>(1.33)   | 5.97<br>(1.39)   | 5.71<br>(1.46)   |
| Female immigrants >10(<60y)                                                                  | 4.69<br>(0.79)   | 4.62<br>(0.87)   | 4.55<br>(0.96)   | 4.47<br>(1.07)   | 4.39<br>(1.17)   | 4.31<br>(1.29)   | 4.22<br>(1.41)   | 4.13<br>(1.52)   | 4.03<br>(1.64)   |
| Female immigrants ≤10(<60y)                                                                  | 4.08<br>(0.93)   | 4.10<br>(1.03)   | 4.13<br>(1.14)   | 4.17<br>(1.27)   | 4.21<br>(1.41)   | 4.24<br>(1.55)   | 4.28<br>(1.70)   | 4.32<br>(1.87)   | 4.36<br>(2.05)   |
| Female locals(<60y)                                                                          | 2.08<br>(0.27)   | 1.98<br>(0.29)   | 1.88<br>(0.32)   | 1.79<br>(0.35)   | 1.71<br>(0.37)   | 1.61<br>(0.41)   | 1.53<br>(0.43)   | 1.44<br>(0.45)   | 1.37<br>(0.47)   |
| Male immigrants >10(<60y)                                                                    | 4.71<br>(0.79)   | 4.55<br>(0.89)   | 4.41<br>(0.99)   | 4.25<br>(1.10)   | 4.12<br>(1.21)   | 3.98<br>(1.32)   | 3.86<br>(1.43)   | 3.74<br>(1.54)   | 3.63<br>(1.65)   |
| Male immigrants ≤10(<60y)                                                                    | 4.70<br>(1.42)   | 4.66<br>(1.55)   | 4.63<br>(1.69)   | 4.59<br>(1.83)   | 4.55<br>(1.99)   | 4.52<br>(2.15)   | 4.48<br>(2.32)   | 4.44<br>(2.50)   | 4.41<br>(2.68)   |
| Male locals(<60y)                                                                            | 2.37<br>(0.29)   | 2.28<br>(0.32)   | 2.21<br>(0.35)   | 2.12<br>(0.38)   | 2.04<br>(0.42)   | 1.97<br>(0.45)   | 1.91<br>(0.49)   | 1.83<br>(0.52)   | 1.77(0.55)       |
| Female immigrants >10(≥60y)                                                                  | 16.23<br>(1.26)  | 15.65<br>(1.47)  | 15.08<br>(1.70)  | 14.55<br>(1.94)  | 14.03<br>(2.18)  | 13.54<br>(2.43)  | 13.07<br>(2.68)  | 12.62<br>(2.92)  | 12.19<br>(3.16)  |
| Female immigrants ≤10(≥60y)                                                                  | 13.01<br>(4.83)  | 12.52<br>(5.11)  | 12.03<br>(5.37)  | 11.55<br>(5.63)  | 11.08<br>(5.88)  | 10.63<br>(6.12)  | 10.19<br>(6.35)  | 9.76(6.56)       | 9.34<br>(6.75)   |
| Female locals(≥60y)                                                                          | 11.86<br>(1.84)  | 11.67<br>(1.98)  | 11.49<br>(2.15)  | 11.33<br>(2.35)  | 11.18<br>(2.58)  | 11.04<br>(2.84)  | 10.91<br>(3.11)  | 10.79(3.4)       | 10.68<br>(3.71)  |
| Male immigrants >10(≥60y)                                                                    | 36.59<br>(2.56)  | 35.17(3.18)      | 33.82<br>(3.86)  | 32.55<br>(4.57)  | 31.34<br>(5.28)  | 30.19<br>(6.01)  | 29.08<br>(6.70)  | 28.02<br>(7.40)  | 27.01<br>(8.07)  |
| Male immigrants ≤10(≥60y)                                                                    | 41.43<br>(11.78) | 41.03<br>(12.71) | 40.61<br>(13.70) | 40.17<br>(14.75) | 39.71<br>(15.85) | 39.24<br>(16.99) | 38.75<br>(18.16) | 38.23<br>(19.35) | 37.71<br>(20.57) |
| Male locals(≥60y)                                                                            | 22.69<br>(3.56)  | 22.37(4.07)      | 22.16(4.84)      | 21.89<br>(5.86)  | 21.61<br>(7.22)  | 21.52<br>(9.02)  | 21.74<br>(11.29) | 22.17<br>(14.03) | 22.73<br>(17.28) |

**eTable 5.** Predictive means and standard deviations (in brackets) of age-standardized mortality rates of stomach cancer per 100,000 population for each gender, age group (less than, greater or equal to 60 years old) and immigrant status from 2022 to 2030.

| Predictive mean of age-standardized mortality rates of prostate cancer per 100,000 population |                 |                  |                 |                  |                  |                  |                  |                  |                 |
|-----------------------------------------------------------------------------------------------|-----------------|------------------|-----------------|------------------|------------------|------------------|------------------|------------------|-----------------|
| Year                                                                                          | 2022            | 2023             | 2024            | 2025             | 2026             | 2027             | 2028             | 2029             | 2030            |
| Male immigrants >10                                                                           | 14.59<br>(0.79) | 14.57<br>(0.96)  | 14.56<br>(1.15) | 14.54<br>(1.37)  | 14.51<br>(1.61)  | 14.48<br>(1.86)  | 14.45<br>(2.13)  | 14.42<br>(2.42)  | 14.38<br>(2.72) |
| Male immigrants ≤ 10                                                                          | 8.78<br>(3.11)  | 8.58(3.29)       | 8.39<br>(3.49)  | 8.19(3.69)       | 8.10(3.89)       | 7.82(4.11)       | 7.63(4.31)       | 7.45(4.51)       | 7.27(4.72)      |
| Male locals                                                                                   | 9.66<br>(1.57)  | 9.67(1.66)       | 9.69<br>(1.77)  | 9.72(1.91)       | 9.75(2.06)       | 9.78(2.23)       | 9.82(2.43)       | 9.86(2.64)       | 9.9(2.88)       |
| Male immigrants >10(<60y)                                                                     | 0.52<br>(0.17)  | 0.51(0.19)       | 0.50<br>(0.21)  | 0.49(0.22)       | 0.48(0.24)       | 0.47(0.25)       | 0.46(0.27)       | 0.45(0.29)       | 0.44(0.31)      |
| Male immigrants ≤ 10(<60y)                                                                    | 0.73<br>(0.77)  | 0.81(0.93)       | 0.87<br>(1.10)  | 0.94(1.31)       | 1.01(1.51)       | 1.09(1.75)       | 1.16(2.02)       | 1.24(2.32)       | 1.33(2.64)      |
| Male locals(<60y)                                                                             | 0.66<br>(0.14)  | 0.66(0.16)       | 0.66<br>(0.19)  | 0.67(0.21)       | 0.67(0.24)       | 0.67(0.27)       | 0.68(0.31)       | 0.68(0.33)       | 0.69(0.37)      |
| Male immigrants >10(≥ 60y)                                                                    | 49.61<br>(2.73) | 49.63<br>(3.29)  | 49.64<br>(3.94) | 49.64<br>(4.68)  | 49.64<br>(5.51)  | 49.63<br>(6.38)  | 49.62<br>(7.32)  | 49.61<br>(8.32)  | 49.58(9.37)     |
| Male immigrants ≤ 10(≥60y)                                                                    | 27.66<br>(9.78) | 26.53<br>(10.21) | 25.4<br>(10.63) | 24.28<br>(11.03) | 23.16<br>(11.41) | 22.07<br>(11.76) | 21.01<br>(12.09) | 19.96<br>(12.38) | 18.95(12.63)    |
| Male locals(≥60y)                                                                             | 31.48<br>(5.49) | 31.40<br>(5.76)  | 31.32<br>(6.09) | 31.24<br>(6.48)  | 31.15<br>(6.94)  | 31.06<br>(7.44)  | 30.96<br>(8.01)  | 30.86<br>(8.61)  | 30.74(9.26)     |

**Table 6.** Predictive means and standard deviations (in brackets) of age-standardized mortality rates of prostate cancer per 100,000 population for each age group (less than, greater or equal to 60 years old) and immigrant status from 2022 to 2030.

# Reporting checklist for cohort study.

Based on the STROBE cohort guidelines.

## Instructions to authors

Complete this checklist by entering the page numbers from your manuscript where readers will find each of the items listed below.

Your article may not currently address all the items on the checklist. Please modify your text to include the missing information. If you are certain that an item does not apply, please write "n/a" and provide a short explanation.

Upload your completed checklist as an extra file when you submit to a journal.

In your methods section, say that you used the STROBE cohort reporting guidelines, and cite them as:

von Elm E, Altman DG, Egger M, Pocock SJ, Gøtzsche PC, Vandenbroucke JP. The Strengthening of Reporting of Observational Studies in Epidemiology (STROBE) Statement: guidelines for reporting observational studies.

|                           |                     |                                                                                                 | Page<br>Number |
|---------------------------|---------------------|-------------------------------------------------------------------------------------------------|----------------|
| <b>Title and abstract</b> |                     |                                                                                                 |                |
| Title                     | <a href="#">#1a</a> | Indicate the study's design with a commonly used term in the title or the abstract              | 1              |
| Abstract                  | <a href="#">#1b</a> | Provide in the abstract an informative and balanced summary of what was done and what was found | 2              |
| <b>Introduction</b>       |                     |                                                                                                 |                |
| Background / rationale    | <a href="#">#2</a>  | Explain the scientific background and rationale for the investigation being reported            | 4              |
| Objectives                | <a href="#">#3</a>  | State specific objectives, including any prespecified hypotheses                                | 4              |
| <b>Methods</b>            |                     |                                                                                                 |                |
| Study design              | <a href="#">#4</a>  | Present key elements of study design early in the paper                                         | 5              |
| Setting                   | <a href="#">#5</a>  | Describe the setting, locations, and relevant dates, including periods                          | 5              |

|    |                      |                                                          |                                                                                                                                                                                                                                                                      |     |
|----|----------------------|----------------------------------------------------------|----------------------------------------------------------------------------------------------------------------------------------------------------------------------------------------------------------------------------------------------------------------------|-----|
| 1  |                      | of recruitment, exposure, follow-up, and data collection |                                                                                                                                                                                                                                                                      |     |
| 2  | Eligibility criteria | <a href="#">#6a</a>                                      | Give the eligibility criteria, and the sources and methods of selection of participants. Describe methods of follow-up.                                                                                                                                              | 5   |
| 3  |                      |                                                          |                                                                                                                                                                                                                                                                      |     |
| 4  |                      |                                                          |                                                                                                                                                                                                                                                                      |     |
| 5  |                      |                                                          |                                                                                                                                                                                                                                                                      |     |
| 6  | Eligibility criteria | <a href="#">#6b</a>                                      | For matched studies, give matching criteria and number of exposed and unexposed                                                                                                                                                                                      | n/a |
| 7  |                      |                                                          |                                                                                                                                                                                                                                                                      |     |
| 8  |                      |                                                          |                                                                                                                                                                                                                                                                      |     |
| 9  |                      |                                                          |                                                                                                                                                                                                                                                                      |     |
| 10 | Variables            | <a href="#">#7</a>                                       | Clearly define all outcomes, exposures, predictors, potential confounders, and effect modifiers. Give diagnostic criteria, if applicable                                                                                                                             | 5   |
| 11 |                      |                                                          |                                                                                                                                                                                                                                                                      |     |
| 12 |                      |                                                          |                                                                                                                                                                                                                                                                      |     |
| 13 |                      |                                                          |                                                                                                                                                                                                                                                                      |     |
| 14 |                      |                                                          |                                                                                                                                                                                                                                                                      |     |
| 15 | Data sources /       | <a href="#">#8</a>                                       | For each variable of interest give sources of data and details of methods of assessment (measurement). Describe comparability of assessment methods if there is more than one group. Give information separately for for exposed and unexposed groups if applicable. | 5   |
| 16 | measurement          |                                                          |                                                                                                                                                                                                                                                                      |     |
| 17 |                      |                                                          |                                                                                                                                                                                                                                                                      |     |
| 18 |                      |                                                          |                                                                                                                                                                                                                                                                      |     |
| 19 |                      |                                                          |                                                                                                                                                                                                                                                                      |     |
| 20 |                      |                                                          |                                                                                                                                                                                                                                                                      |     |
| 21 |                      |                                                          |                                                                                                                                                                                                                                                                      |     |
| 22 | Bias                 | <a href="#">#9</a>                                       | Describe any efforts to address potential sources of bias                                                                                                                                                                                                            | 5   |
| 23 |                      |                                                          |                                                                                                                                                                                                                                                                      |     |
| 24 | Study size           | <a href="#">#10</a>                                      | Explain how the study size was arrived at                                                                                                                                                                                                                            | 5   |
| 25 |                      |                                                          |                                                                                                                                                                                                                                                                      |     |
| 26 |                      |                                                          |                                                                                                                                                                                                                                                                      |     |
| 27 | Quantitative         | <a href="#">#11</a>                                      | Explain how quantitative variables were handled in the analyses. If applicable, describe which groupings were chosen, and why                                                                                                                                        | 5   |
| 28 | variables            |                                                          |                                                                                                                                                                                                                                                                      |     |
| 29 |                      |                                                          |                                                                                                                                                                                                                                                                      |     |
| 30 |                      |                                                          |                                                                                                                                                                                                                                                                      |     |
| 31 | Statistical          | <a href="#">#12a</a>                                     | Describe all statistical methods, including those used to control for confounding                                                                                                                                                                                    |     |
| 32 | methods              |                                                          |                                                                                                                                                                                                                                                                      |     |
| 33 |                      |                                                          |                                                                                                                                                                                                                                                                      |     |
| 34 | 5                    |                                                          |                                                                                                                                                                                                                                                                      |     |
| 35 |                      |                                                          |                                                                                                                                                                                                                                                                      |     |
| 36 |                      |                                                          |                                                                                                                                                                                                                                                                      |     |
| 37 | Statistical          | <a href="#">#12b</a>                                     | Describe any methods used to examine subgroups and interactions                                                                                                                                                                                                      | 5   |
| 38 | methods              |                                                          |                                                                                                                                                                                                                                                                      |     |
| 39 |                      |                                                          |                                                                                                                                                                                                                                                                      |     |
| 40 |                      |                                                          |                                                                                                                                                                                                                                                                      |     |
| 41 | Statistical          | <a href="#">#12c</a>                                     | Explain how missing data were addressed                                                                                                                                                                                                                              | 5   |
| 42 | methods              |                                                          |                                                                                                                                                                                                                                                                      |     |
| 43 |                      |                                                          |                                                                                                                                                                                                                                                                      |     |
| 44 | Statistical          | <a href="#">#12d</a>                                     | If applicable, explain how loss to follow-up was addressed                                                                                                                                                                                                           | n/a |
| 45 | methods              |                                                          |                                                                                                                                                                                                                                                                      |     |
| 46 |                      |                                                          |                                                                                                                                                                                                                                                                      |     |
| 47 |                      |                                                          |                                                                                                                                                                                                                                                                      |     |
| 48 | Statistical          | <a href="#">#12e</a>                                     | Describe any sensitivity analyses                                                                                                                                                                                                                                    |     |
| 49 | methods              |                                                          |                                                                                                                                                                                                                                                                      |     |
| 50 |                      |                                                          |                                                                                                                                                                                                                                                                      |     |
| 51 |                      |                                                          |                                                                                                                                                                                                                                                                      |     |
| 52 | n/a                  |                                                          |                                                                                                                                                                                                                                                                      |     |
| 53 |                      |                                                          |                                                                                                                                                                                                                                                                      |     |
| 54 | <b>Results</b>       |                                                          |                                                                                                                                                                                                                                                                      |     |
| 55 |                      |                                                          |                                                                                                                                                                                                                                                                      |     |
| 56 |                      |                                                          |                                                                                                                                                                                                                                                                      |     |
| 57 | Participants         | <a href="#">#13a</a>                                     | Report numbers of individuals at each stage of study—eg numbers potentially eligible, examined for eligibility, confirmed eligible,                                                                                                                                  | n/a |
| 58 |                      |                                                          |                                                                                                                                                                                                                                                                      |     |
| 59 |                      |                                                          |                                                                                                                                                                                                                                                                      |     |
| 60 |                      |                                                          |                                                                                                                                                                                                                                                                      |     |

included in the study, completing follow-up, and analysed. Give information separately for for exposed and unexposed groups if applicable.

|    |                  |                      |                                                                            |
|----|------------------|----------------------|----------------------------------------------------------------------------|
| 1  |                  |                      |                                                                            |
| 2  |                  |                      |                                                                            |
| 3  |                  |                      |                                                                            |
| 4  |                  |                      |                                                                            |
| 5  | Participants     | <a href="#">#13b</a> | Give reasons for non-participation at each stage 5                         |
| 6  |                  |                      |                                                                            |
| 7  | Participants     | <a href="#">#13c</a> | Consider use of a flow diagram                                             |
| 8  |                  |                      |                                                                            |
| 9  | n/a              |                      |                                                                            |
| 10 |                  |                      |                                                                            |
| 11 |                  |                      |                                                                            |
| 12 | Descriptive data | <a href="#">#14a</a> | Give characteristics of study participants (eg demographic, clinical, 5    |
| 13 |                  |                      | social) and information on exposures and potential confounders. Give       |
| 14 |                  |                      | information separately for exposed and unexposed groups if                 |
| 15 |                  |                      | applicable.                                                                |
| 16 |                  |                      |                                                                            |
| 17 |                  |                      |                                                                            |
| 18 |                  |                      |                                                                            |
| 19 | Descriptive data | <a href="#">#14b</a> | Indicate number of participants with missing data for each variable of     |
| 20 |                  |                      | interest                                                                   |
| 21 |                  |                      |                                                                            |
| 22 |                  |                      |                                                                            |
| 23 | n/a              |                      |                                                                            |
| 24 |                  |                      |                                                                            |
| 25 | Descriptive data | <a href="#">#14c</a> | Summarise follow-up time (eg, average and total amount)                    |
| 26 |                  |                      |                                                                            |
| 27 |                  |                      |                                                                            |
| 28 | n/a              |                      |                                                                            |
| 29 |                  |                      |                                                                            |
| 30 | Outcome data     | <a href="#">#15</a>  | Report numbers of outcome events or summary measures over time.            |
| 31 |                  |                      | Give information separately for exposed and unexposed groups if            |
| 32 |                  |                      | applicable.                                                                |
| 33 |                  |                      |                                                                            |
| 34 |                  |                      |                                                                            |
| 35 | n/a              |                      |                                                                            |
| 36 |                  |                      |                                                                            |
| 37 |                  |                      |                                                                            |
| 38 | Main results     | <a href="#">#16a</a> | Give unadjusted estimates and, if applicable, confounder-adjusted 6        |
| 39 |                  |                      | estimates and their precision (eg, 95% confidence interval). Make          |
| 40 |                  |                      | clear which confounders were adjusted for and why they were                |
| 41 |                  |                      | included                                                                   |
| 42 |                  |                      |                                                                            |
| 43 |                  |                      |                                                                            |
| 44 | Main results     | <a href="#">#16b</a> | Report category boundaries when continuous variables were  n/a             |
| 45 |                  |                      | categorized                                                                |
| 46 |                  |                      |                                                                            |
| 47 |                  |                      |                                                                            |
| 48 | Main results     | <a href="#">#16c</a> | If relevant, consider translating estimates of relative risk into absolute |
| 49 |                  |                      | risk for a meaningful time period                                          |
| 50 |                  |                      |                                                                            |
| 51 |                  |                      |                                                                            |
| 52 | n/a              |                      |                                                                            |
| 53 |                  |                      |                                                                            |
| 54 | Other analyses   | <a href="#">#17</a>  | Report other analyses done—eg analyses of subgroups and 7                  |
| 55 |                  |                      | interactions, and sensitivity analyses                                     |
| 56 |                  |                      |                                                                            |
| 57 |                  |                      |                                                                            |

## Discussion

|    |                    |                     |                                                                          |    |
|----|--------------------|---------------------|--------------------------------------------------------------------------|----|
| 1  | Key results        | <a href="#">#18</a> | Summarise key results with reference to study objectives                 | 8  |
| 2  |                    |                     |                                                                          |    |
| 3  | Limitations        | <a href="#">#19</a> | Discuss limitations of the study, taking into account sources of         | 10 |
| 4  |                    |                     | potential bias or imprecision. Discuss both direction and magnitude of   |    |
| 5  |                    |                     | any potential bias.                                                      |    |
| 6  |                    |                     |                                                                          |    |
| 7  |                    |                     |                                                                          |    |
| 8  | Interpretation     | <a href="#">#20</a> | Give a cautious overall interpretation considering objectives,           | 8  |
| 9  |                    |                     | limitations, multiplicity of analyses, results from similar studies, and |    |
| 10 |                    |                     | other relevant evidence.                                                 |    |
| 11 |                    |                     |                                                                          |    |
| 12 |                    |                     |                                                                          |    |
| 13 | Generalisability   | <a href="#">#21</a> | Discuss the generalisability (external validity) of the study results    | 9  |
| 14 |                    |                     |                                                                          |    |
| 15 |                    |                     |                                                                          |    |
| 16 | <b>Other</b>       |                     |                                                                          |    |
| 17 | <b>Information</b> |                     |                                                                          |    |
| 18 |                    |                     |                                                                          |    |
| 19 |                    |                     |                                                                          |    |
| 20 | Funding            | <a href="#">#22</a> | Give the source of funding and the role of the funders for the present   | 11 |
| 21 |                    |                     | study and, if applicable, for the original study on which the present    |    |
| 22 |                    |                     | article is based                                                         |    |
| 23 |                    |                     |                                                                          |    |
| 24 |                    |                     |                                                                          |    |

The STROBE checklist is distributed under the terms of the Creative Commons Attribution License CC-BY. This checklist was completed on 11. February 2023 using <https://www.goodreports.org/>, a tool made by the [EQUATOR Network](#) in collaboration with [Penelope.ai](#)



# BMJ Open

## An age-period-cohort analysis and projection of cancer mortality in Hong Kong, 1998–2030

|                                 |                                                                                                                                                                                                                                                                                                                                                                                                                                                                                         |
|---------------------------------|-----------------------------------------------------------------------------------------------------------------------------------------------------------------------------------------------------------------------------------------------------------------------------------------------------------------------------------------------------------------------------------------------------------------------------------------------------------------------------------------|
| Journal:                        | <i>BMJ Open</i>                                                                                                                                                                                                                                                                                                                                                                                                                                                                         |
| Manuscript ID                   | bmjopen-2023-072751.R2                                                                                                                                                                                                                                                                                                                                                                                                                                                                  |
| Article Type:                   | Original research                                                                                                                                                                                                                                                                                                                                                                                                                                                                       |
| Date Submitted by the Author:   | 04-Aug-2023                                                                                                                                                                                                                                                                                                                                                                                                                                                                             |
| Complete List of Authors:       | Zhao, Yanji; The Hong Kong Polytechnic University, Department of Applied Mathematics<br>Zhuang, Zian; The Hong Kong Polytechnic University, Department of Applied Mathematics; University of California Los Angeles, Department of Biostatistics<br>Yang, Lin; The Hong Kong Polytechnic University, School of Nursing<br>He, Daihai; The Hong Kong Polytechnic University, Department of Applied Mathematics; The Hong Kong Polytechnic University, Research Institute for Future Food |
| <b>Primary Subject Heading</b>: | Research methods                                                                                                                                                                                                                                                                                                                                                                                                                                                                        |
| Secondary Subject Heading:      | Public health, Oncology                                                                                                                                                                                                                                                                                                                                                                                                                                                                 |
| Keywords:                       | STATISTICS & RESEARCH METHODS, ONCOLOGY, Risk Factors                                                                                                                                                                                                                                                                                                                                                                                                                                   |
|                                 |                                                                                                                                                                                                                                                                                                                                                                                                                                                                                         |

SCHOLARONE™  
Manuscripts



I, the Submitting Author has the right to grant and does grant on behalf of all authors of the Work (as defined in the below author licence), an exclusive licence and/or a non-exclusive licence for contributions from authors who are: i) UK Crown employees; ii) where BMJ has agreed a CC-BY licence shall apply, and/or iii) in accordance with the terms applicable for US Federal Government officers or employees acting as part of their official duties; on a worldwide, perpetual, irrevocable, royalty-free basis to BMJ Publishing Group Ltd ("BMJ") its licensees and where the relevant Journal is co-owned by BMJ to the co-owners of the Journal, to publish the Work in this journal and any other BMJ products and to exploit all rights, as set out in our [licence](#).

The Submitting Author accepts and understands that any supply made under these terms is made by BMJ to the Submitting Author unless you are acting as an employee on behalf of your employer or a postgraduate student of an affiliated institution which is paying any applicable article publishing charge ("APC") for Open Access articles. Where the Submitting Author wishes to make the Work available on an Open Access basis (and intends to pay the relevant APC), the terms of reuse of such Open Access shall be governed by a Creative Commons licence – details of these licences and which [Creative Commons](#) licence will apply to this Work are set out in our licence referred to above.

Other than as permitted in any relevant BMJ Author's Self Archiving Policies, I confirm this Work has not been accepted for publication elsewhere, is not being considered for publication elsewhere and does not duplicate material already published. I confirm all authors consent to publication of this Work and authorise the granting of this licence.

# An age-period-cohort analysis and projection of cancer mortality in Hong Kong, 1998–2030

Yanji Zhao<sup>1,#</sup>, Zian Zhuang<sup>1,2,#</sup>, Lin Yang<sup>3</sup> and Daihai He<sup>1,4\*</sup>

1 Department of Applied Mathematics, Hong Kong Polytechnic University, Hong Kong, China

2 Department of Biostatistics, University of California, Los Angeles, CA, United States

3 School of Nursing, Hong Kong Polytechnic University, Hong Kong, China

4 Research Institute for Future Food, Hong Kong Polytechnic University, Hong Kong, China

# These authors contributed equally to this work.

\* To whom correspondence should be addressed:

Department of Applied Mathematics, The Hong Kong Polytechnic University, Hong Kong, China

Tel: 852-27667864; [daihai.he@polyu.edu.hk](mailto:daihai.he@polyu.edu.hk) (DH).

## Email of all authors

Yanji Zhao: [yan-ji.zhao@connect.polyu.hk](mailto:yan-ji.zhao@connect.polyu.hk); Zian Zhuang: [zianzhuang@ucla.edu](mailto:zianzhuang@ucla.edu);

Lin Yang: [l.yang@polyu.edu.hk](mailto:l.yang@polyu.edu.hk); Daihai He: [daihai.he@polyu.edu.hk](mailto:daihai.he@polyu.edu.hk).

*Word count: 3342*

## 24 Abstract

25 **Objectives:** To explore the relationship between immigration groups and cancer mortality, this  
26 study aimed to explore age, period, birth cohort effects and effects across genders and  
27 immigration groups on mortality rates of lung, pancreatic, colon, liver, prostate and stomach  
28 cancers and their projections.

30 **Design, Setting, and Participants:** Death registry data in Hong Kong between 1998 and 2021,  
31 which were stratified by age, sex and immigration status. Immigration status was classified into  
32 three groups: locals born in Hong Kong, long-stay immigrants and short-stay immigrants.

34 **Methods:** Age-period-cohort analysis was used to examine age, period, and birth cohort effects  
35 for genders and immigration groups from 1998 to 2021. Bayesian age-period-cohort models  
36 were applied to predict the mortality rates from 2022 to 2030.

38 **Results:** Short-stay immigrants revealed pronounced fluctuations of mortality rates by age and  
39 of relative risks by cohort and period effects for six types of cancers than those of long-stay  
40 immigrants and locals. Immigrants for each type of cancer and gender will be at a higher  
41 mortality risk than locals, as men will be at a higher risk of mortality from cancers than women  
42 in the future (excluding prostate cancer). After 2021, decreasing trends ( $p<0.05$ ) or plateau  
43 ( $p>0.05$ ) of forecasting mortality rates of cancers occur for all immigration groups, except for  
44 increasing trends for short-stay male immigrants with colon cancer ( $p<0.05$ , Avg +0.30  
45 deaths/100,000 per annum from 15.47 to 18.50 deaths/100,000) and long-stay male immigrants  
46 with pancreatic cancer ( $p<0.05$ , Avg +0.72 deaths/100,000 per annum from 16.30 to 23.49  
47 deaths/100,000).

49 **Conclusions:** Findings underscore the effect of gender and immigration status in Hong Kong  
50 on mortality risks of cancers that immigrants for each type of cancer and gender will be at a  
51 higher mortality risk than locals.

53 **Keywords:** Age-period-cohort analysis, immigration, mortality, lung cancer, pancreatic cancer,  
54 colon cancer, liver cancer, prostate cancer, stomach cancer

1  
2  
3  
4  
5  
6  
7  
8  
9  
10  
11  
12  
13  
14  
15  
16  
17  
18  
19  
20  
21  
22  
23  
24  
25  
26  
27  
28  
29  
30  
31  
32  
33  
34  
35  
36  
37  
38  
39  
40  
41  
42  
43  
44  
45  
46  
47  
48  
49  
50  
51  
52  
53  
54  
55  
56  
57  
58  
59  
60  
61  
62

## 55 **Strengths and limitations of this study**

56

57 • This study provides new evidence regarding the relationship between immigration status  
58 and cancer mortality, given the effects of age, period, birth cohort and their predictions.

59

60 • The non-identifiability problem has not been interpreted in APC models

61

62 • The future perspective of cancer therapies and techniques have not been considered.

For peer review only

## 64 Introduction

65 Several migration waves from mainland China to Hong Kong have occurred over the past  
66 century. These migration waves included a large-scale migration inflow from 1945 to 1950 (the  
67 Chinese Civil War) and a few small-scale inflows in the 1950s, 1970s, and 1990s [1-3]. In 2016,  
68 immigrants from mainland China formed approximately 38% of the population of Hong Kong.  
69 These inflows have led to a growing interest in research on the disparity of health conditions  
70 between the locals and immigrants.

71  
72 Cancer has been one of the most common causes of death, as an estimated 19.3 million new  
73 cancer cases and 9.9 million new cancer-associated deaths occurred worldwide in 2020 [4]. In  
74 Hong Kong, lung cancer is one of the most common causes of cancer deaths [5, 6]. Previous  
75 studies suggested that the primary cause of lung cancer is cigarette smoking [7-11]. Genetic  
76 factors, asbestos, radon gas, second-hand smoke, and other forms of air pollution have been  
77 proven to influence the risk of lung cancer [12-18]. The overall daily smoking rate in mainland  
78 China was approximately 23.2% in 2018 [19], whereas the daily smoking rate in Hong Kong  
79 was only 10.2% in 2019 [20]. The leading causes of liver cancer include viral infection,  
80 drinking of alcohol and polluted water and food supplies which are also culprits for colon,  
81 stomach and pancreatic cancer [21]. Alcohol consumption per capita in Hong Kong has reached  
82 2.37 liters in 2021 [22], compared to 7.0 liters of per capita consumption of alcohol in mainland  
83 China in 2018 [23]. As approximately 99% of prostate cancer cases occur after age 50, factors  
84 of prostate cancer have been regarded as old age, race, family history and the diet of red meat  
85 consumption [24]. In addition to these risk factors, studies have suggested that cancer mortality  
86 rates vary depending on migrant status [25-28]. According to data from the Census and  
87 Statistics Department of Hong Kong, approximately 81% of immigrants in Hong Kong  
88 immigrated from mainland China, Macau, and Taiwan. Immigrants from mainland China  
89 account for the bulk of this population. Previous studies have shown that child immigrants in  
90 Hong Kong tend to suffer from a higher risk of wheezing disorders and cardiovascular diseases,  
91 and immigrant women have higher age-specific mortality rates of breast cancer than locally-  
92 born women in Hong Kong [29, 30]. However, to date, few studies have investigated the effect  
93 of length of stay in Hong Kong and birthplace on the risk of other types of cancer.

94  
95 In this study, we compared the mortality rates of lung, pancreatic, colon, liver, prostate and  
96 stomach cancers between locally born residents in Hong Kong and immigrants from mainland  
97 China. Both populations are widely considered as ethnically homogeneous with similar cultures.  
98 Nevertheless, due to different early life experiences, immigrants are exposed to more various  
99 social economy and lifestyles than locals. Therefore, it's constructive to ascertain whether  
100 immigrants from mainland China have a different mortality pattern of cancers from locals to

1  
2  
3  
4 101 verify the significance of migration status for this health outcome. As Age-period-cohort (APC)  
5 102 analysis plays a vital role in studying time-specific phenomena in epidemiology, in this study,  
6 103 to evaluate the effect of immigration on cancer mortality in the past and future, we developed  
7 104 APC models specified by sex and migrant status to assess the effects of age, period, birth cohort,  
8 105 and of the length of stay in Hong Kong on the mortality risks of cancers. Additionally, we  
9 106 explore the projection of mortality rates for the locally born population and immigrants in Hong  
10 107 Kong who were younger or older than 60 using a predictive model, taking into account age,  
11 108 period, and birth cohort effects as well.  
12  
13  
14  
15  
16

## 17 110 **Methods**

### 18 111 *Data*

19 112 We obtained the death registry data in Hong Kong between 1998 and 2021 from the Census  
20 113 and Statistics Department of Hong Kong, as the data in 2022 has not been available up to now.  
21 114 The data was extracted from a routine census held by the Hong Kong government as subjective  
22 115 errors caused by resampling can be neglected. The population data were stratified by age, sex,  
23 116 immigration status, and length of stay in Hong Kong. We retrieved six types of cancer cases  
24 117 from the death registry data using ICD codes, such as ICD-9 code 162 and ICD-10 codes  
25 118 C34.0–C34.3, C348, and C349 for lung cancer. To assure comparability among  
26 119 registries, deaths from the age group of 35–85 years were selected, since cases younger than 35  
27 120 and older than 85 were relatively trivial for lack of statistical interpretability [31]. Immigration  
28 121 status was classified into three groups: locals born in Hong Kong, immigrants who have lived  
29 122 in Hong Kong for >10 years before death defined as long-stay immigrants, and immigrants who  
30 123 have lived in Hong Kong for ≤10 years before death defined as short-stay immigrants. Notably,  
31 124 much focus was placed on immigrants from mainland China, because approximately 81% of  
32 125 immigrants in Hong Kong came from mainland China, Macau, and Taiwan based on the data  
33 126 from the Census and Statistics Department of Hong Kong. Moreover, few cases recorded from  
34 127 Macau and Taiwan are statistically insignificant in the analysis. Demographics and population  
35 128 projections from 2022 to 2030 were retrieved from the Census and Statistics Department of  
36 129 Hong Kong and estimated with cubic smoothing spline as the prerequisite of the predictive  
37 130 model. Codes for APC and BAPC analysis are available in the GitHub repository  
38 131 (<https://github.com/kshz2164313/APC-population-projections-for-immigration-HK>).  
39  
40  
41  
42  
43  
44  
45  
46  
47  
48  
49  
50  
51  
52  
53

### 54 134 *Statistical analysis*

55 135 We modeled cancer mortality rates in Hong Kong using APC analysis based on log-linear  
56 136 Poisson regression models. The model aimed to disentangle age, period, and cohort effects of  
57 137 time-varying phenomena simultaneously [32, 33], given that  
58  
59  
60

$$\log(E_{ij}) = \alpha_i + \beta_j + \gamma_k + \mu + \log(\theta_{ij}) \quad (1)$$

where  $E_{ij}$  denotes expected mortality;  $\alpha_i$ ,  $\beta_j$ , and  $\gamma_k$  denote age, period, and cohort effect, respectively, for  $i = 1, \dots, I$ ,  $j = 1, \dots, J$ ,  $k = 1, \dots, K$  with  $k = I - i + j$ .  $\log(\theta_{ij})$  is the offset. We mainly focused on the contributions of sex and immigration status due to the non-identifiability problem that the effects of these three components are collinear with each other (denoted as period – age = cohort) [34]. Birth cohort effect and period effect were assessed with relative risks to evaluate the effect of three components. The median year of birth among cases was regarded as the reference cohort [35,36]. Since death cases aged at 35–85 years between 1998 and 2021 were selected, the range of birth cohort from 1913 to 1986 covered observations and further projections until 2030. The second and penultimate period effects were constrained to the reference for period. For sex and immigration status, maximum likelihood framework was applied to estimate the relative risks and 95% confidence intervals (CIs) by age groups, calendar period, and birth cohort.

Several projection approaches for future cancer mortality have been developed, but a Bayesian age-period-cohort (BAPC) model built upon integrated nested Laplace approximations (INLA) [37] yields relatively higher coverage and better performance for all evaluated parameter combinations [38]. To prevent some sampling problems caused by Markov chain Monte Carlo (MCMC), this MCMC-free BAPC approach was applied to predict future cancer mortality within a fully Bayesian inference setting and provide outputs of interest simply, such as projected age-standardized and age-specific rates. Convergence checks are not necessary for this technique [37]. The projections of age-standardized cancer mortality rates for each sex, age group (younger or older than 60 years) and migrant status, taking into account age, period, and birth cohort effects, were performed based on the weights of population age groups from the WHO World Standard population [39], with 95% prediction intervals. Mann-Kendall trend test was applied to verify the projection trend.

All analyses were performed via R version 4.2.1 (R Core Team, R Foundation for Statistical Computing, Vienna, Austria, 2013, <http://www.R-project.org/>). The APC models were established using the Epi package, and the projections based on Bayesian APC models were performed with the BAPC package.

#### Patient and Public Involvement

None.

## Results

Figure 1 & 2 and eFigure 1(a-e) in **Supplementary Material** illustrate the estimates of age



1  
2  
3  
4 176 (assessed by cancer mortality), cohort and period effects (assessed by relative risk) based on  
5 177 APC models among three migrant groups for men and women with six types of cancers,  
6 178 respectively. All the mortality rates for each gender and immigration status exhibit notable  
7  
8 179 increasing trends with age. Age, cohort and period effects of six types of cancer for immigrants  
9 180 who stayed in Hong Kong for  $\leq 10$  years revealed relatively more pronounced fluctuations and  
10 181 deviations from those effects in the other two immigration groups. Significant increasing trends  
11 182 of age effect occurred in all types of cancer, regardless of gender and immigration status. For  
12 183 example, while relatively insignificant differences in lung cancer mortality rates by  
13 184 immigration status among females have performed, male immigrants who remained in Hong  
14 185 Kong for  $> 10$  years had higher lung cancer mortality rates at ages above 50 years and those  
15 186 who arrived  $\leq 10$  years had lower lung cancer mortality at ages below 62 years compared to  
16 187 local men Figure 1. In addition to compatible dynamics of period effect for locals and long-stay  
17 188 immigrants, similar changes of relative risks by birth cohort for locals and long-stay immigrants  
18 189 in lung, colon, liver and stomach cancers occurred before 1945, whereas significant differences  
19 190 of relative risks by birth cohort between these two immigration groups occurred after 1960  
20 191 (Figure 1 & eFigure 1(a,b,d)). Locals and long-stay immigrants in pancreatic and prostate  
21 192 cancer perform almost similar changes of relative risks by birth cohort effects all the time  
22 193 (eFigure 1(c,e)). Short-stay immigrants who have stayed in Hong Kong for  $\leq 10$  years had more  
23 194 fluctuating relative risks affected by period effects before 2020 than those for locals and long-  
24 195 stay immigrants. Lack of young cases, especially young short-stay immigrants, of prostate  
25 196 cancer leads to significant deviations and variances in age and cohort effects.

26  
27  
28  
29  
30  
31  
32  
33  
34  
35 197  
36 198 Figure 3-5, eFigure 2-6 in **Supplementary Material** illustrate the age-standardized mortality  
37 199 rates of six types of cancer from 1998 to 2021 and their projections by sex, immigrant status  
38 200 and age groups from 2022 to 2030, taking into account age, period, and birth cohort effects.  
39 201 Means and standard deviations of predictive mortality rates are shown in eTable 1-6 in  
40 202 **Supplementary Material**. For all ages projection (Figure 2 & eFigure 2-6), as men will be at  
41 203 higher risk of mortality rates of cancers (excluding prostate cancer) than women in the future  
42 204 for all three age groups (all ages, young and older than 60 years), given the projected trends,  
43 205 immigrants for each gender, especially who have stayed in Hong Kong for  $> 10$  years will suffer  
44 206 from higher mortality rates of cancer in each year than locals. Monotone decreasing trends or  
45 207 plateau of forecasting occur for both genders and all immigration groups in cancers, except for  
46 208 increasing trends for male immigrants who have stayed in Hong Kong for  $\leq 10$  years with colon  
47 209 cancer ( $p < 0.05$ , Avg +0.30 deaths/100,000 per annum) from 15.47 deaths/100,000 (95% CI:  
48 210 11.28, 19.66) in 2021 to 18.50 deaths/100,000 (95% CI: 2.31, 34.69) in 2030, and male  
49 211 immigrants who have stayed in Hong Kong for  $> 10$  years with pancreatic cancer ( $p < 0.05$ ,  
50 212 Avg +0.72 deaths/100,000 per annum) from 16.30 deaths/100,000 (95% CI: 14.38,17.26) in  
51 213 2021 to 23.49 deaths/100,000 (95% CI: 12.49, 34.49) in 2030. Most of predictive trends for

1  
2  
3  
4 214 younger cases (<60 years) and older cases ( $\geq 60$  years) reach a consensus with those for all ages  
5  
6 215 population, except for two phenomena: 1.) mortality rates of lung cancer for men immigrants  
7  
8 216  $\leq 10$  that insignificant trend for all ages ( $p > 0.05$ ) vs. decline for younger cases ( $p < 0.05$ ) vs.  
9  
10 217 increase for older cases ( $p < 0.05$ ); 2.) mortality rates of liver cancer for men immigrants  $> 10$   
11  
12 218 that decline for all ages ( $p < 0.05$ ) vs. decline for younger cases ( $p < 0.05$ ) vs. insignificant  
13  
14 219 trend for older cases ( $p > 0.05$ ). Some particular cases occur in the projection of prostate cancer  
15  
16 220 that young long-stay male immigrants (0.44 deaths/100,000, 95% CI: 0, 1.05) aged less than 60  
17  
18 221 will be at lower mortality rate than locals (0.69 deaths/100,000, 95% CI: 0, 1.42) in 2030  
19  
20 222 (eTable 6). Compared with other cancers and immigration groups, male immigrants who have  
21  
22 223 stayed in Hong Kong for  $> 10$  years with lung cancer would perform the most significant decline  
23  
24 224 in predictive mean from 102.90 (95% CI: 98.14, 107.66) to 79.55 (95% CI: 47.46, 111.64)  
25  
26 225 deaths per 100,000 population (Avg -2.34 deaths/100,000 per annum) (eTable 1), while the  
27  
28 226 same immigration group with pancreatic cancer would indicate the most significant uptrend in  
29  
30 227 each year of 16.30 (95% CI: 14.38, 17.26) and 23.49 (95% CI: 12.49, 34.49) deaths per 100,000  
31  
32 228 population in 2021 and 2030, respectively (Avg +0.72 deaths/100,000 per annum) (eTable 4).  
33  
34 229  
35  
36 230  
37  
38 231

## 31 232 **Discussion**

33 233 Early detection of cancer is positive and instructive for increasing chances of cure. Nevertheless,  
34 234 the high mortality rate of cancer results from late diagnosis among most patients after  
35 235 progression to more advanced or severe stages. Individuals at high risk of cancer, such as  
36 236 smokers, alcoholics or those who are frequently exposed to susceptible circumstances, should  
37 237 be screened for early detections to increase opportunities for cure [40]. Therefore, the  
38 238 differences in mortality rates among immigration groups are synonymous with detection means,  
39 239 therapies, and social history in disparate periods and areas.  
40  
41 240

42 241 While the changes in mortality rates by age for long-stay immigrants reached approximate  
43 242 harmony with those for locals, the changes in mortality rates by age for short-stay immigrants  
44 243 revealed clear differences with those for the other two populations. The group of long-stay  
45 244 immigrants had a higher risk of death from lung, colon and liver cancers than the other two  
46 245 immigration groups after the age of 60 years. Short-stay male immigrants were less likely to  
47 246 die from lung cancer before the age of 65 years. The contrast in age effects among the  
48 247 immigration groups was partially consistent with studies [25, 41] that highlighted the age  
49 248 effects for locals and immigrants on breast cancer mortality in Hong Kong and lung cancer  
50 249 incidence in Sweden, as they both showed similar trends and magnitudes between locals and  
51 250 immigrants before the age of 60 years. They are also compatible with the results in [42] that

1  
2  
3 251 diagnosis of liver cancer is the most frequent among populations at 55 to 65 years old.  
4 252 According to these trends, young individuals, especially new young immigrant men, who  
5 253 have benefited from all-rounded development in mainland China and Hong Kong, are more  
6 254 likely to seek early detection and be treated for cancers using more advanced treatments [43].  
7  
8 255 Differences in birth cohort effects among immigrant groups partially comply with the  
9 256 interpretation above.  
10  
11 257

12  
13  
14 258 We observed significant trends of cohort effects among locals and immigrants. These findings  
15 259 are partially consistent but subtly different from previous findings, regarding the effect of  
16 260 immigration status on cancers. Zhao et al. [25] described multiple peaks of cohort effects on  
17 261 breast cancer mortality between locals and immigrants in Hong Kong, as well as a significant  
18 262 decline in cohort effects after 1950. In contrast, Sung et al. [44] investigated the difference in  
19 263 breast cancer incidence between Chinese Americans and non-Hispanic whites in the U.S. and  
20 264 emphasized that Chinese Americans were at lower risk of breast cancer than non-Hispanic  
21 265 whites born in the same year. Here, we interpret the cohort-driven trends resulting from the  
22 266 intricacy of social history and lifestyle. Compared to a relatively stable social development in  
23 267 Hong Kong, representing downward trends of relative risks for locals, wars and social  
24 268 instability in mainland China resulted in several immigration waves from mainland China to  
25 269 Hong Kong before 1950. Additionally, remarkable increasing trends were recorded for new  
26 270 immigrants after 1950, which corresponded to the economic downturn after wars and famine  
27 271 between 1959 and 1961 during their youth [45]. The increasing trends for new immigrants  
28 272 and similar trends for locals and long-stay immigrants were consistent with the finding that  
29 273 nutrient deficiency contributes to a higher risk of severe mortality rates of cancers [46].  
30 274 Furthermore, we speculate that these trends, especially those for locals and long-stay  
31 275 immigrants, are most likely attributed to social development and personal behaviors, such as  
32 276 daily habits, occupational history, different diagnoses and treatments, and domestic  
33 277 environmental exposures. Notably, short-stay immigrants suffered from a lower risk of death  
34 278 from colon cancer for all ages (eFigure 1a in **Supplementary Material**). As locals and  
35 279 immigrants in Hong Kong transitioned to more westernized lifestyles, higher consumption of  
36 280 meat was associated with a higher risk of these types of cancer, whereas consumption of  
37 281 vegetables had a strong protective effect against pancreatic cancer, and moderate  
38 282 consumption of coffee appeared to be beneficial against lung cancer [47,48]. Further studies  
39 283 on potential risk factors are required.  
40  
41 284

42  
43  
44 285 Short-stay immigrants had more fluctuating and non-stationary but inconspicuous relative  
45 286 risks by period effects before 2021 than locals and long-stay immigrants. Cumulatively, an  
46 287 arch pattern and fluctuating curve depicting period effects externally resulted in an arch  
47 288 pattern of age-standardized mortality rates for short-stay immigrant women and irregular rates  
48  
49  
50  
51  
52  
53  
54  
55  
56  
57  
58  
59  
60

1  
2  
3 289 for short-stay immigrant men before 2021. The external performance of different period  
4 290 effects on mortality rates could be most likely attributed to the higher effect of different  
5 291 lifestyles and social development on new immigrants than on long-stay immigrants and locals  
6 292 in Hong Kong. For the age-standardized mortality rates and projections, consistent with  
7 293 previous findings [49,50], we predict that the mortality rates of cancer in Hong Kong after  
8 294 2021 will continue to decline or remain relatively stable, consistent with the trends before  
9 295 2020, except for male immigrants who have stayed in Hong Kong for  $\leq 10$  years with colon  
10 296 cancer and male immigrants who have stayed in Hong Kong for  $>10$  years with pancreatic  
11 297 cancer. Men will be at higher risk of mortality rates of cancer than women, regardless of  
12 298 immigration status. They are also compatible with the results in [4] that men suffer from a  
13 299 higher risk of these types of cancer than women, excluding prostate cancer. Furthermore, new  
14 300 immigrant women will be at lower risk than local women, even though long-stay immigrants  
15 301 will suffer from higher mortality rates than locals in the future. Potential interpretations could  
16 302 be consistent with those for birth cohort effects, as age and period effects are considered as  
17 303 confounders of cohort effect.  
18 304

19 305 In the past few decades, spurred by an increasing burden of high incidence and mortality rates  
20 306 of cancer, several studies focused on the inherent identification dilemma of three effects in the  
21 307 APC model. Further, complicated population distribution and immigration status in Hong  
22 308 Kong, one of the areas with the highest population density and migration frequency in the  
23 309 world, have intricate causes and inherent dynamics of cancer and other diseases. To our  
24 310 knowledge, few studies have assessed the relationship between immigration status and cancer  
25 311 mortality. Therefore, this study is original to examine the effect of the length of stay in Hong  
26 312 Kong and origins of previous residence on cancer deaths, which is instructive for further  
27 313 immigration policy-making and targeted strategies of disease detection and intervention.  
28 314 However, this study had several limitations. Given the non-identifiability problem in age-  
29 315 period-cohort models, we could only depict trends and variations among different  
30 316 immigration and sex groups, as illustrated in figures, and insufficiently perform the estimates  
31 317 of the contributions of three effects or subgroups to mortality rates. Furthermore, we adopted  
32 318 a cubic smoothing spline to estimate populations of immigrants and locals due to the large  
33 319 proportion of unspecified immigration status from official demographic projections. A few  
34 320 acceptable cases resulted in a limited type of cancer so that some common cancers, such as  
35 321 the ovary and cervix, were discarded. Since the issue of quantification, the future perspective  
36 322 of cancer therapies and techniques have not been considered in the model of projection.

37 323  
38 324

## 39 325 **Conclusion**

1  
2  
3 326 We conclude that immigrants, especially short-stay immigrants, had more pronounced  
4 327 fluctuations of mortality rates by age and of relative risks by cohort and period effects for six  
5 328 types of cancers than those of long-stay immigrants and locals. Men will be at a higher risk of  
6 329 mortality rates of six types of cancer than women in the future. Male immigrants who have  
7 330 stayed in Hong Kong for  $\leq 10$  years with colon cancer and male immigrants who have stayed  
8 331 in Hong Kong for  $> 10$  years with pancreatic cancer would perform significant uptrend in the  
9 332 future, while other immigration groups for each type of cancer would continue to decline or  
10 333 remain relatively stable. Immigrants for each gender in Hong Kong would suffer from higher  
11 334 mortality risks of cancers than locals in the future.  
12  
13  
14  
15  
16  
17  
18  
19  
20  
21  
22  
23  
24  
25  
26  
27  
28  
29  
30  
31  
32  
33  
34  
35  
36  
37  
38  
39  
40  
41  
42  
43  
44  
45  
46  
47  
48  
49  
50  
51  
52  
53  
54  
55  
56  
57  
58  
59  
60

For peer review only

1  
2  
3  
4 335 **Declaration**

5  
6 336 **Ethical approval and consent to participate**

7  
8 337 Ethical approval and consent to participate are not applicable. This study does not involve  
9  
10 338 human participants. Data was obtained from the Census and Statistics Department of Hong  
11  
12 339 Kong.

13  
14 340 **Consent for publication**

15  
16 341 Not applicable.

17  
18 342 **Data Availability Statement**

19  
20 343 Data are available upon reasonable request.

21  
22 344 **Author contributions**

23  
24 345 **Yanji Zhao:** Methodology, Formal analysis, Data Curation, Writing - Original Draft,  
25 346 Visualization

26  
27 347 **Zian Zhuang:** Methodology, Formal analysis, Data Curation, Writing - Review & Editing

28 348 **Lin Yang:** Validation, Writing - Review & Editing

29 349 **Daihai He:** Conceptualization, Writing - Review & Editing, Supervision

30 350

31  
32 351 **Funding**

33  
34 352 The work described in this paper was partially supported by a grant from the Research Grants  
35 353 Council of the Hong Kong Special Administrative Region, China (HKU C7123-20G).

36  
37 354 **Conflict of interest**

38  
39 355 None declared.

40  
41 356 **Acknowledgements**

42  
43 357 None.

44  
45 358



## 360 References

- 361
- 362 1. Fan S-C. The population projection of Hong Kong. *Southeast Asian Journal of Social Science*.  
363 1974;2(1/2):105-17.
- 364 2. Department CaS. Hong Kong Statistics 1947-1967 (Report).  
365 [https://www.statistics.gov.hk/pub/hist/1961\\_1970/B10100031967AN67E0100.pdf](https://www.statistics.gov.hk/pub/hist/1961_1970/B10100031967AN67E0100.pdf),  
366 Accessed 4th May 2019.
- 367 3. Department CaS. Demographic Trends in Hong Kong 1981-2011 (Report).  
368 <http://www.statistics.gov.hk/pub/B1120017032012XXXXB0100.pdf>, Accessed 4th May 2019.
- 369 4. Sung H, Ferlay J, Siegel RL, Laversanne M, Soerjomataram I, Jemal A, et al. Global Cancer  
370 Statistics 2020: GLOBOCAN Estimates of Incidence and Mortality Worldwide for 36 Cancers  
371 in 185 Countries. *CA: A Cancer Journal for Clinicians*. 2021 2021/05/01;71(3):209-49. doi:  
372 <https://doi.org/10.3322/caac.21660>.
- 373 5. Wang XR, Chiu YL, Qiu H, Au JSK, Yu ITS. The roles of smoking and cooking emissions  
374 in lung cancer risk among Chinese women in Hong Kong. *Annals of Oncology*. 2009  
375 2009/04/01;20(4):746-51. doi: <https://doi.org/10.1093/annonc/mdn699>.
- 376 6. Chiu Y-L, Wang X-R, Qiu H, Yu IT-S. Risk factors for lung cancer: a case-control study in  
377 Hong Kong women. *Cancer Causes & Control*. 2010 2010/05/01;21(5):777-85. doi:  
378 10.1007/s10552-010-9506-9.
- 379 7. Office on S, Health. Publications and Reports of the Surgeon General. Women and  
380 Smoking: A Report of the Surgeon General. Atlanta (GA): Centers for Disease Control and  
381 Prevention (US); 2001.
- 382 8. Escobedo LG, Peddicord JP. Smoking prevalence in US birth cohorts: the influence of gender  
383 and education. *American Journal of Public Health*. 1996 1996/02/01;86(2):231-6. doi:  
384 10.2105/AJPH.86.2.231.
- 385 9. Husten CG, Shelton DM, Chrismon JH, Lin YC, Mowery P, Powell FA. Cigarette smoking  
386 and smoking cessation among older adults: United States, 1965-94. *Tobacco Control*.  
387 1997;6(3):175. doi: 10.1136/tc.6.3.175.
- 388 10. Bolego C, Poli A, Paoletti R. Smoking and gender. *Cardiovascular Research*.  
389 2002;53(3):568-76. doi: 10.1016/S0008-6363(01)00520-X.
- 390 11. Doll R, Hill AB. The mortality of doctors in relation to their smoking habits; a preliminary  
391 report. *Br Med J*. 1954;1(4877):1451-5. PMID: 13160495. doi: 10.1136/bmj.1.4877.1451.
- 392 12. Ramada Rodilla JM, Calvo Cerrada B, Serra Pujadas C, Delclos GL, Benavides FG. Fiber  
393 burden and asbestos-related diseases: an umbrella review. *Gaceta Sanitaria*. 2021 2021/06/11/.  
394 doi: <https://doi.org/10.1016/j.gaceta.2021.04.001>.
- 395 13. Collishaw NE, Kirkbride J, Wigle DT. Tobacco smoke in the workplace: an occupational  
396 health hazard. *Can Med Assoc J*. 1984;131(10):1199-204. PMID: 6498670.
- 397 14. Dresler CM, Fratelli C, Babb J, Everley L, Evans AA, Clapper ML. Gender differences in  
398 genetic susceptibility for lung cancer. *Lung Cancer*. 2000 2000/12/01;30(3):153-60. doi:  
399 [https://doi.org/10.1016/S0169-5002\(00\)00163-X](https://doi.org/10.1016/S0169-5002(00)00163-X).
- 400 15. Alexandrov K, Cascorbi I, Rojas M, Bouvier G, Kriek E, Bartsch H. CYP1A1 and GSTM1  
401 genotypes affect benzo[ a ]pyrene DNA adducts in smokers' lung: comparison with  
402 aromatic/hydrophobic adduct formation. *Carcinogenesis*. 2002;23(12):1969-77. doi:

- 1  
2  
3 403 10.1093/carcin/23.12.1969.
- 4 404 16. Samet JM. Radon and Lung Cancer. JNCI: Journal of the National Cancer Institute.  
5 405 1989;81(10):745-58. doi: 10.1093/jnci/81.10.745.
- 6 406 17. Darby S, Hill D, Auvinen A, Barros-Dios JM, Baysson H, Bochicchio F, et al. Radon in  
7 407 homes and risk of lung cancer: collaborative analysis of individual data from 13 European case-  
8 408 control studies. BMJ. 2005;330(7485):223. doi: 10.1136/bmj.38308.477650.63.
- 9 409 18. Raaschou-Nielsen O, Andersen ZJ, Beelen R, Samoli E, Stafoggia M, Weinmayr G, et al.  
10 410 Air pollution and lung cancer incidence in 17 European cohorts: prospective analyses from the  
11 411 European Study of Cohorts for Air Pollution Effects (ESCAPE). The Lancet Oncology. 2013  
12 412 2013/08/01/;14(9):813-22. doi: [https://doi.org/10.1016/S1470-2045\(13\)70279-1](https://doi.org/10.1016/S1470-2045(13)70279-1).
- 13 413 19. 2018 Summary-20190719. Retrieved August 26, 2022, from  
14 414 [https://www.who.int/docs/default-source/wpro---documents/countries/china/2018-gats-china-](https://www.who.int/docs/default-source/wpro---documents/countries/china/2018-gats-china-factsheet-cn-en.pdf?sfvrsn=3f4e2da9_2)  
15 415 [factsheet-cn-en.pdf?sfvrsn=3f4e2da9\\_2](https://www.who.int/docs/default-source/wpro---documents/countries/china/2018-gats-china-factsheet-cn-en.pdf?sfvrsn=3f4e2da9_2)
- 16 416 20. *Thematic household survey*. Retrieved August 26, 2022, from  
17 417 [https://www.censtatd.gov.hk/en/data/stat\\_report/product/B1130201/att/B11302702020XXXX](https://www.censtatd.gov.hk/en/data/stat_report/product/B1130201/att/B11302702020XXXX)  
18 418 B0100.pdf
- 19 419 21. Abubakar II, Tillmann T, Banerjee A. Global, regional, and national age-sex specific all-  
20 420 cause and cause-specific mortality for 240 causes of death, 1990-2013: a systematic analysis  
21 421 for the Global Burden of Disease Study 2013. Lancet. 2015 Jan 10;385(9963):117-71.
- 22 422 22. Estimated alcohol consumption per capita in Hong Kong. Change4Health. (n.d.).  
23 423 Retrieved December 1, 2022, from  
24 424 [https://www.change4health.gov.hk/en/alcohol\\_aware/figures/alcohol\\_consumption/index.htm](https://www.change4health.gov.hk/en/alcohol_aware/figures/alcohol_consumption/index.htm)  
25 425 1
- 26 426 23. World Health Organization. Global status report on alcohol and health 2018. World  
27 427 Health Organization; 2019 Feb 14.
- 28 428 24. Wild C. World cancer report 2014. Wild CP, Stewart BW, editors. Geneva, Switzerland:  
29 429 World Health Organization; 2014.
- 30 430
- 31 431 25. Zhao S, Dong H, Qin J, Liu H, Li Y, Chen Y, et al. Breast cancer mortality in Chinese  
32 432 women: does migrant status play a role? Annals of Epidemiology. 2019 2019/12/01/;40:28-  
33 433 34.e2. doi: <https://doi.org/10.1016/j.annepidem.2019.10.006>.
- 34 434 26. Gomez SL, Yang J, Lin S-W, McCusker M, Sandler A, Cheng I, et al. Incidence trends of  
35 435 lung cancer by immigration status among Chinese Americans. Cancer Epidemiol Biomarkers  
36 436 Prev. 2015;24(8):1157-64. PMID: 25990553. doi: 10.1158/1055-9965.EPI-15-0123.
- 37 437 27. Hemminki K, Li X, Czene K. Cancer risks in first-generation immigrants to Sweden.  
38 438 International Journal of Cancer. 2002 2002/05/10;99(2):218-28. doi:  
39 439 <https://doi.org/10.1002/ijc.10322>.
- 40 440 28. Vanthomme K, Roskamp M, De Schutter H, Vandenneede H. Lung cancer incidence  
41 441 differences in migrant men in Belgium, 2004–2013: histology-specific analyses. BMC Cancer.  
42 442 2021 2021/03/30;21(1):328. doi: 10.1186/s12885-021-08038-6.
- 43 443 29. Schooling M, Leung GM, Janus ED, Ho SY, Hedley AJ, Lam TH. Childhood migration  
44 444 and cardiovascular risk. International Journal of Epidemiology. 2004;33(6):1219-26. doi:  
45 445 10.1093/ije/dyh221.
- 46 446 30. Leung JYY, Li AM, Leung GM, Schooling CM. Mode of delivery and childhood



- 1  
2  
3 447 hospitalizations for asthma and other wheezing disorders. *Clinical & Experimental Allergy*.  
4 448 2015 2015/06/01;45(6):1109-17. doi: <https://doi.org/10.1111/cea.12548>.  
5  
6 449 31. Baker A, Bray I. Bayesian projections: what are the effects of excluding data from younger  
7 450 age groups?. *American Journal of Epidemiology*. 2005 Oct 15;162(8):798-805.  
8  
9 451 32. Rosenberg PS, Anderson WF. Age-Period-Cohort Models in Cancer Surveillance Research:  
10 452 Ready for Prime Time? APC Models. *Cancer Epidemiology, Biomarkers & Prevention*. 2011  
11 453 Jul 1;20(7):1263-8.  
12  
13 454 33. Holford T. Analyzing the effects of age, period and cohort on incidence and mortality rates.  
14 455 *Stat Meth Med Res*. 1992;1:317-37.  
15  
16 456 34. Brookmeyer R, Stroup DF, editors. *Monitoring the health of populations: statistical*  
17 457 *principles and methods for public health surveillance*. Oxford University Press; 2004.  
18  
19 458 35. Yang Y, Land KC. *Age-period-cohort analysis: New models, methods, and empirical*  
20 459 *applications*. Taylor & Francis; 2013.  
21  
22 460 36. Robertson C, Gandini S, Boyle P. Age-period-cohort models: a comparative study of  
23 461 available methodologies. *Journal of clinical epidemiology*. 1999 Jun 1;52(6):569-83.  
24  
25 462 37. Riebler A, Held L. Projecting the future burden of cancer: Bayesian age-period-cohort  
26 463 analysis with integrated nested Laplace approximations. *Biometrical Journal*. 2017  
27 464 May;59(3):531-49.  
28  
29 465 38. Knoll M, Furkel J, Debus J, Abdollahi A, Karch A, Stock C. An R package for an integrated  
30 466 evaluation of statistical approaches to cancer incidence projection. *BMC medical research*  
31 467 *methodology*. 2020 Dec;20(1):1-1.  
32  
33 468 39. Ahmad OB, Boschi-Pinto C, Lopez AD, Murray CJ, Lozano R, Inoue M. Age  
34 469 standardization of rates: a new WHO standard. Geneva: World Health Organization. 2001  
35 470 Jan;9(10):1-4.  
36  
37 471 40. Sung H, Ferlay J, Siegel RL, Laversanne M, Soerjomataram I, Jemal A, Bray F. Global  
38 472 cancer statistics 2020: GLOBOCAN estimates of incidence and mortality worldwide for 36  
39 473 cancers in 185 countries. *CA: a cancer journal for clinicians*. 2021 May;71(3):209-49.  
40  
41 474 41. Mousavi SM, Fallah M, Sundquist K, Hemminki K. Age-and time-dependent changes in  
42 475 cancer incidence among immigrants to Sweden: colorectal, lung, breast and prostate cancers.  
43 476 *International journal of cancer*. 2012 Jul 15;131(2):E122-8.  
44  
45 477 42. National Cancer Institute. SEER stat fact sheets: liver and intrahepatic bile duct cancer.  
46  
47 478 43. Wu X, Chung VC, Hui EP, Ziea ET, Ng BF, Ho RS, Tsoi KK, Wong S, Wu JC.  
48 479 Effectiveness of acupuncture and related therapies for palliative care of cancer: overview of  
49 480 systematic reviews. *Scientific reports*. 2015 Nov 26;5(1):1-5.  
50  
51 481 44. Sung H, Rosenberg PS, Chen WQ, Hartman M, Lim WY, Chia KS, Wai-Kong Mang O,  
52 482 Tse L, Anderson WF, Yang XR. The impact of breast cancer-specific birth cohort effects among  
53 483 younger and older Chinese populations. *International journal of cancer*. 2016 Aug  
54 484 1;139(3):527-34.  
55  
56 485 45. *The world economy volume 1: a millennial perspective, 2, Historical statistics*: Academic  
57 486 *Foundation, Gurgaon, India (2007)*  
58  
59 487 46. Elias SG, Peeters PH, Grobbee DE, van Noord PA. The 1944-1945 Dutch famine and  
60 488 subsequent overall cancer incidence. *Cancer Epidemiology Biomarkers & Prevention*. 2005  
489 489 Aug;14(8):1981-5.  
490 47. Chiu YL, Wang XR, Qiu H, Yu IT. Risk factors for lung cancer: a case-control study in

- 1  
2  
3 491 Hong Kong women. *Cancer Causes & Control*. 2010 May;21(5):777-85.  
4 492 48. Li J, Lam AS, Yau ST, Yiu KK, Tsoi KK. Antihypertensive treatments and risks of lung  
5 493 Cancer: A large population-based cohort study in Hong Kong. *BMC cancer*. 2021 Dec;21(1):1-  
6 494 9.  
7  
8 495 49. Du J, Sun H, Sun Y, Du J, Cao W, Sun S. Assessment of age, period, and cohort effects of  
9 496 lung cancer incidence in Hong Kong and projection up to 2030 based on changing  
10 497 demographics. *American Journal of Cancer Research*. 2021;11(12):5902.  
11  
12 498 50. *Centre for Health Protection, Department of Health - Lung Cancer*. Centre for Health  
13 499 Protection. Retrieved August 10, 2022, from  
14 500 <https://www.chp.gov.hk/en/healthtopics/content/25/49.html>

15  
16  
17  
18  
19  
20  
21  
22  
23  
24  
25  
26  
27  
28  
29  
30  
31  
32  
33  
34  
35  
36  
37  
38  
39  
40  
41  
42  
43  
44  
45  
46  
47  
48  
49  
50  
51  
52  
53  
54  
55  
56  
57  
58  
59  
60

For peer review only

1  
2  
3  
4  
5  
6  
7  
8  
9  
10  
11  
12  
13  
14  
15  
16  
17  
18  
19  
20  
21  
22  
23  
24  
25  
26  
27  
28  
29  
30  
31  
32  
33  
34  
35  
36  
37  
38  
39  
40  
41  
42  
43  
44  
45  
46  
47  
48  
49  
50  
51  
52  
53  
54  
55  
56  
57  
58  
59  
60

501  
502  
503  
504  
505  
506  
507

**Figure 1.** Parameter estimates of age (a), cohort (b) and period (c) effects based on an age-period-cohort model of male lung cancer mortality rates by immigrant groups: locals, immigrants stay in Hong Kong for more than 10 years and immigrants stay in Hong Kong for less than or equal to 10 years. Age effect was assessed by mortality (left axis). Cohort and period effects were assessed by relative risk (right axis), 95% confidence intervals are shown as shaded bands.

For peer review only

1  
2 508  
3 509  
4 510  
5 511  
6 512  
7 513  
8 514  
9  
10  
11  
12  
13  
14  
15  
16  
17  
18  
19  
20  
21  
22  
23  
24  
25  
26  
27  
28  
29  
30  
31  
32  
33  
34  
35  
36  
37  
38  
39  
40  
41  
42  
43  
44  
45  
46  
47  
48  
49  
50  
51  
52  
53  
54  
55  
56  
57  
58  
59  
60

**Figure 2.** Parameter estimates of age (a), cohort (b) and period (c) effects based on an age-period-cohort model of female lung cancer mortality rates by immigrant groups: locals, immigrants stay in Hong Kong for more than 10 years and immigrants stay in Hong Kong for less than or equal to 10 years. Age effect was assessed by mortality (left axis). Cohort and period effects were assessed by relative risk (right axis), 95% confidence intervals are shown as shaded bands.

For peer review only

1  
2 515  
3 516 **Figure 3.** Projections of lung cancer mortality rates by gender and immigrant status from 2022 to 2030. Observations  
4 517 are shown as dots with the predictive distribution between the 5% and 95% quantile, whereby each lighter shade of  
5 518 red represents an additional 10% predictive CI. The predictive mean is shown as black solid line and the vertical  
6 519 dashed line indicates where prediction started.  
7 520

8  
9  
10  
11  
12  
13  
14  
15  
16  
17  
18  
19  
20  
21  
22  
23  
24  
25  
26  
27  
28  
29  
30  
31  
32  
33  
34  
35  
36  
37  
38  
39  
40  
41  
42  
43  
44  
45  
46  
47  
48  
49  
50  
51  
52  
53  
54  
55  
56  
57  
58  
59  
60

For peer review only

1  
2 521  
3 522  
4 523  
5 524  
6 525  
7 526  
8  
9  
10  
11  
12  
13  
14  
15  
16  
17  
18  
19  
20  
21  
22  
23  
24  
25  
26  
27  
28  
29  
30  
31  
32  
33  
34  
35  
36  
37  
38  
39  
40  
41  
42  
43  
44  
45  
46  
47  
48  
49  
50  
51  
52  
53  
54  
55  
56  
57  
58  
59  
60

**Figure 4.** Projections of lung cancer mortality rates for the population younger than 60 by gender and immigrant status from 2022 to 2030. Observations are shown as dots with the predictive distribution between the 5% and 95% quantile, whereby each lighter shade of red represents an additional 10% predictive CI. The predictive mean is shown as black solid line and the vertical dashed line indicates where prediction started.

For peer review only

1  
2 527  
3 528  
4 529  
5 530  
6 531  
7 532  
8  
9  
10  
11  
12  
13  
14  
15  
16  
17  
18  
19  
20  
21  
22  
23  
24  
25  
26  
27  
28  
29  
30  
31  
32  
33  
34  
35  
36  
37  
38  
39  
40  
41  
42  
43  
44  
45  
46  
47  
48  
49  
50  
51  
52  
53  
54  
55  
56  
57  
58  
59  
60

**Figure 5.** Projections of lung cancer mortality rates for the population older than or equal to 60 by gender and immigrant status from 2022 to 2030. Observations are shown as dots with the predictive distribution between the 5% and 95% quantile, whereby each lighter shade of red represents an additional 10% predictive CI. The predictive mean is shown as black solid line and the vertical dashed line indicates where prediction started.

For peer review only

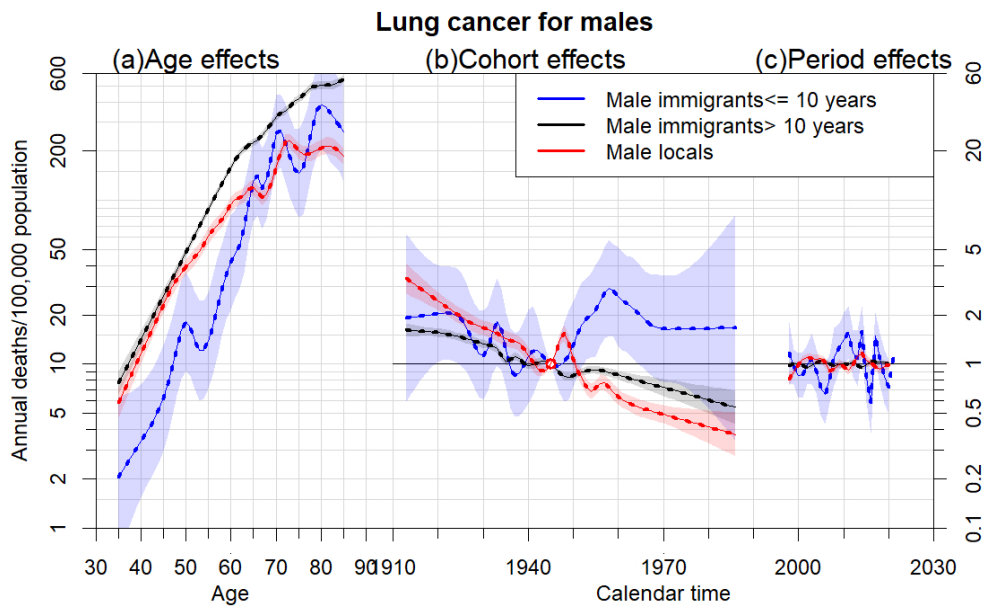

Figure 1. Parameter estimates of age (a), cohort (b) and period (c) effects based on an age-period-cohort model of male lung cancer mortality rates by immigrant groups: locals, immigrants stay in Hong Kong for more than 10 years and immigrants stay in Hong Kong for less than or equal to 10 years. Age effect was assessed by mortality (left axis). Cohort and period effects were assessed by relative risk (right axis), 95% confidence intervals are shown as shaded bands.

495x343mm (57 x 57 DPI)



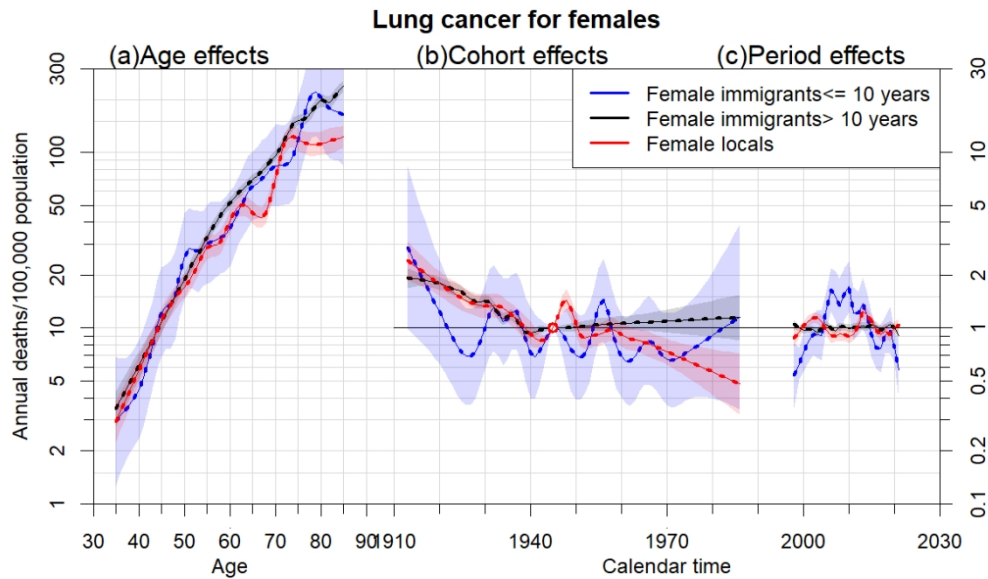

Figure 2. Parameter estimates of age (a), cohort (b) and period (c) effects based on an age-period-cohort model of female lung cancer mortality rates by immigrant groups: locals, immigrants stay in Hong Kong for more than 10 years and immigrants stay in Hong Kong for less than or equal to 10 years. Age effect was assessed by mortality (left axis). Cohort and period effects were assessed by relative risk (right axis), 95% confidence intervals are shown as shaded bands.

519x343mm (57 x 57 DPI)



Figure 3. Projections of lung cancer mortality rates by gender and immigrant status from 2022 to 2030. Observations are shown as dots with the predictive distribution between the 5% and 95% quantile, whereby each lighter shade of red represents an additional 10% predictive CI. The predictive mean is shown as black solid line and the vertical dashed line indicates where prediction started.

519x343mm (57 x 57 DPI)

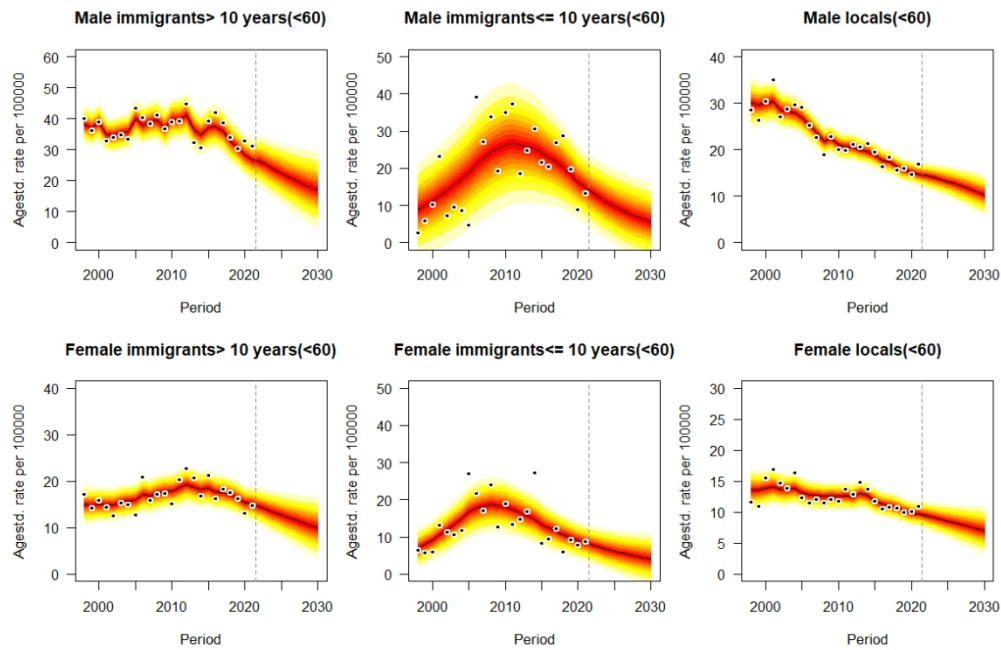

Figure 4. Projections of lung cancer mortality rates for the population younger than 60 by gender and immigrant status from 2022 to 2030. Observations are shown as dots with the predictive distribution between the 5% and 95% quantile, whereby each lighter shade of red represents an additional 10% predictive CI. The predictive mean is shown as black solid line and the vertical dashed line indicates where prediction started.

519x343mm (57 x 57 DPI)

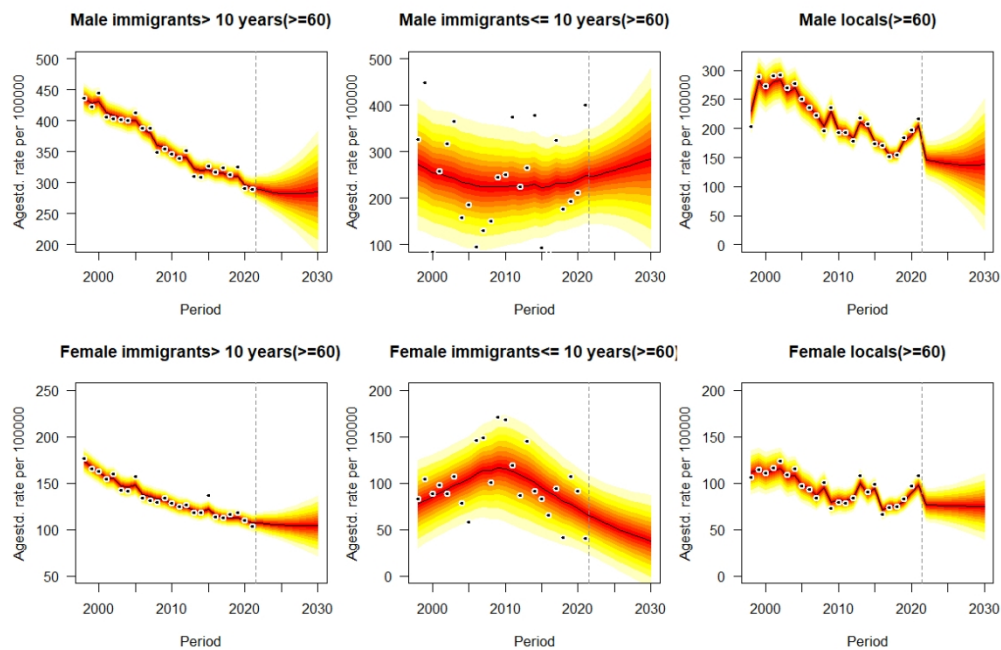

Figure 5. Projections of lung cancer mortality rates for the population older than or equal to 60 by gender and immigrant status from 2022 to 2030. Observations are shown as dots with the predictive distribution between the 5% and 95% quantile, whereby each lighter shade of red represents an additional 10% predictive CI. The predictive mean is shown as black solid line and the vertical dashed line indicates where prediction started.

519x343mm (57 x 57 DPI)

## Supplementary Material for

### “An age-period-cohort analysis and projection of cancer mortality in

### Hong Kong, 1998–2030”

#### APC Figures

|                                      |   |
|--------------------------------------|---|
| eFigure 1(a) Colon cancer .....      | 3 |
| eFigure 1(b) Liver cancer .....      | 4 |
| eFigure 1(c) Pancreatic cancer ..... | 5 |
| eFigure 1(d) Stomach cancer .....    | 6 |
| eFigure 1(e) Prostate cancer .....   | 7 |

#### Projection Figures

|                                                 |    |
|-------------------------------------------------|----|
| Colon cancer                                    |    |
| eFigure 2(a)Projection (all ages) .....         | 8  |
| eFigure 2(b)Projection (<60 years) .....        | 9  |
| eFigure 2(c)Projection ( $\geq 60$ years) ..... | 10 |
| Liver cancer                                    |    |
| eFigure 3(a)Projection (all ages) .....         | 11 |
| eFigure 3(b)Projection (<60 years) .....        | 12 |
| eFigure 3(c)Projection ( $\geq 60$ years) ..... | 13 |
| Pancreatic cancer                               |    |
| eFigure 4(a)Projection (all ages) .....         | 14 |
| eFigure 4(b)Projection (<60 years) .....        | 15 |
| eFigure 4(c)Projection ( $\geq 60$ years) ..... | 16 |
| Stomach cancer                                  |    |
| eFigure 5(a)Projection (all ages) .....         | 17 |
| eFigure 5(b)Projection (<60 years) .....        | 18 |

1  
2  
3  
4  
5  
6  
7  
8  
9  
10  
11  
12  
13  
14  
15  
16  
17  
18  
19  
20  
21  
22  
23  
24  
25  
26  
27  
28  
29  
30  
31  
32  
33  
34  
35  
36  
37  
38  
39  
40  
41  
42  
43  
44  
45  
46  
47  
48  
49  
50  
51  
52  
53  
54  
55  
56  
57  
58  
59  
60

eFigure 5(c)Projection ( $\geq 60$  years)..... 19

Prostate cancer

eFigure 6 Projection (all ages,  $< 60$  years and  $\geq 60$  years)..... 20

**Tables**

eTable 1 Lung cancer..... 21

eTable 2 Colon cancer..... 22

eTable 3 Liver cancer ..... 23

eTable 4 Pancreatic cancer ..... 24

eTable 5 Stomach cancer ..... 25

eTable 6 Prostate cancer ..... 26

peer review only



**eFigure 1(a).** Parameter estimates of age (a), cohort (b) and period (c) effects based on an age-period-cohort model of male and female colon cancer mortality rates by immigrant groups: locals, immigrants stay in Hong Kong for more than 10 years and immigrants stay in Hong Kong for less than or equal to 10 years. Age effect was assessed by mortality (left axis). Cohort and period effects were assessed by relative risk (right axis), 95% confidence intervals are shown as shaded bands.

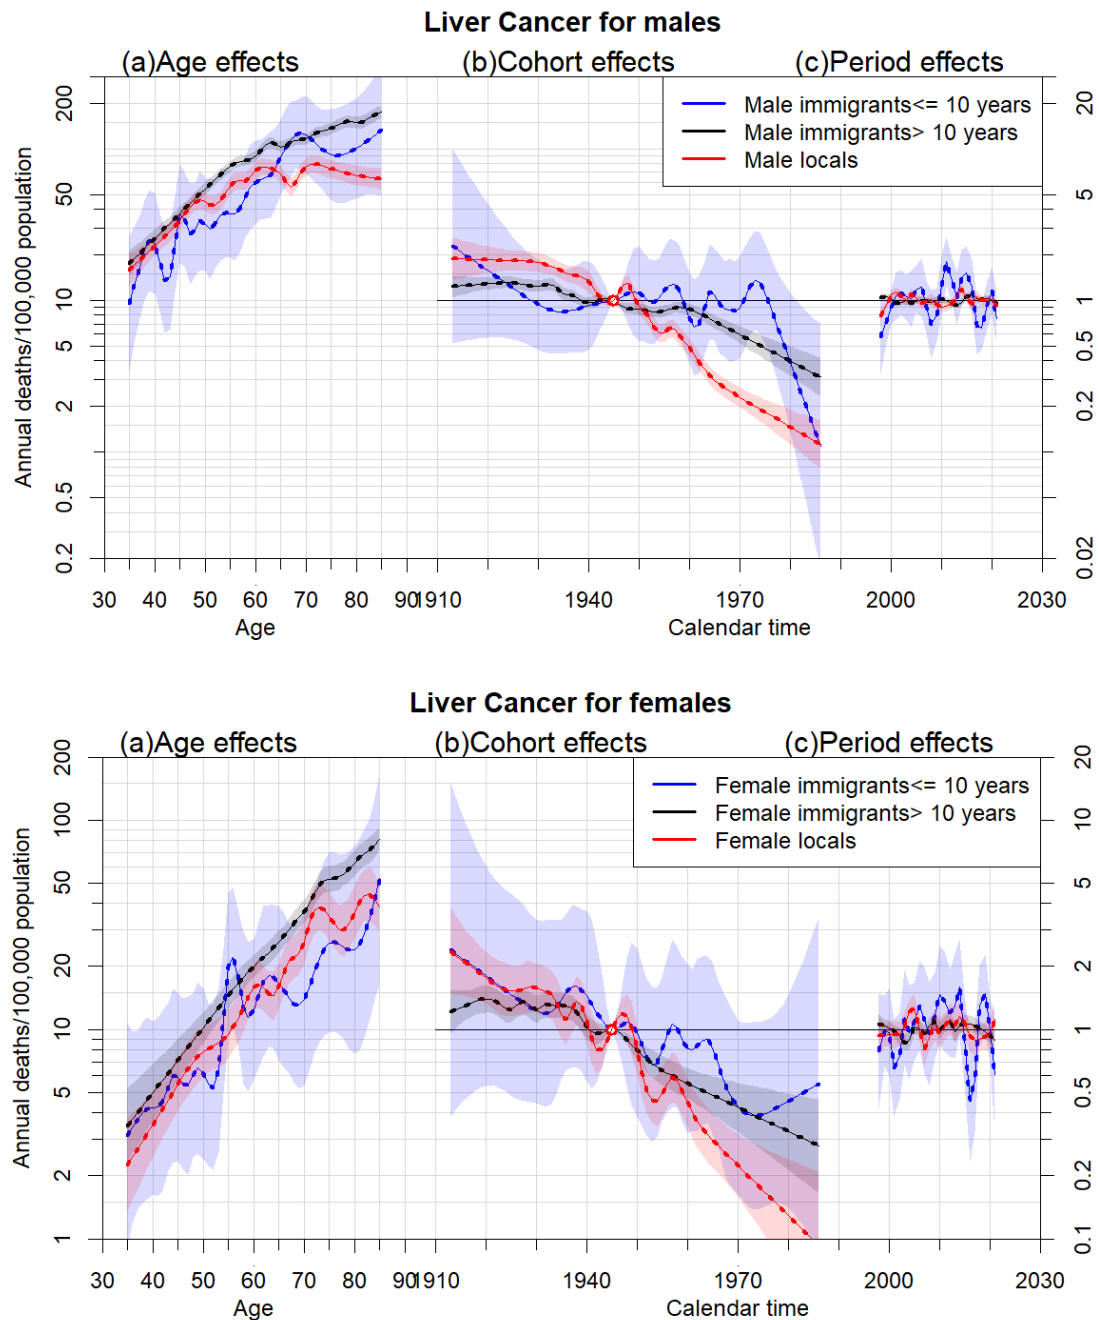

**eFigure 1(b).** Parameter estimates of age (a), cohort (b) and period (c) effects based on an age-period-cohort model of male and female liver cancer mortality rates by immigrant groups: locals, immigrants stay in Hong Kong for more than 10 years and immigrants stay in Hong Kong for less than or equal to 10 years. Age effect was assessed by mortality (left axis). Cohort and period effects were assessed by relative risk (right axis), 95% confidence intervals are shown as shaded bands.



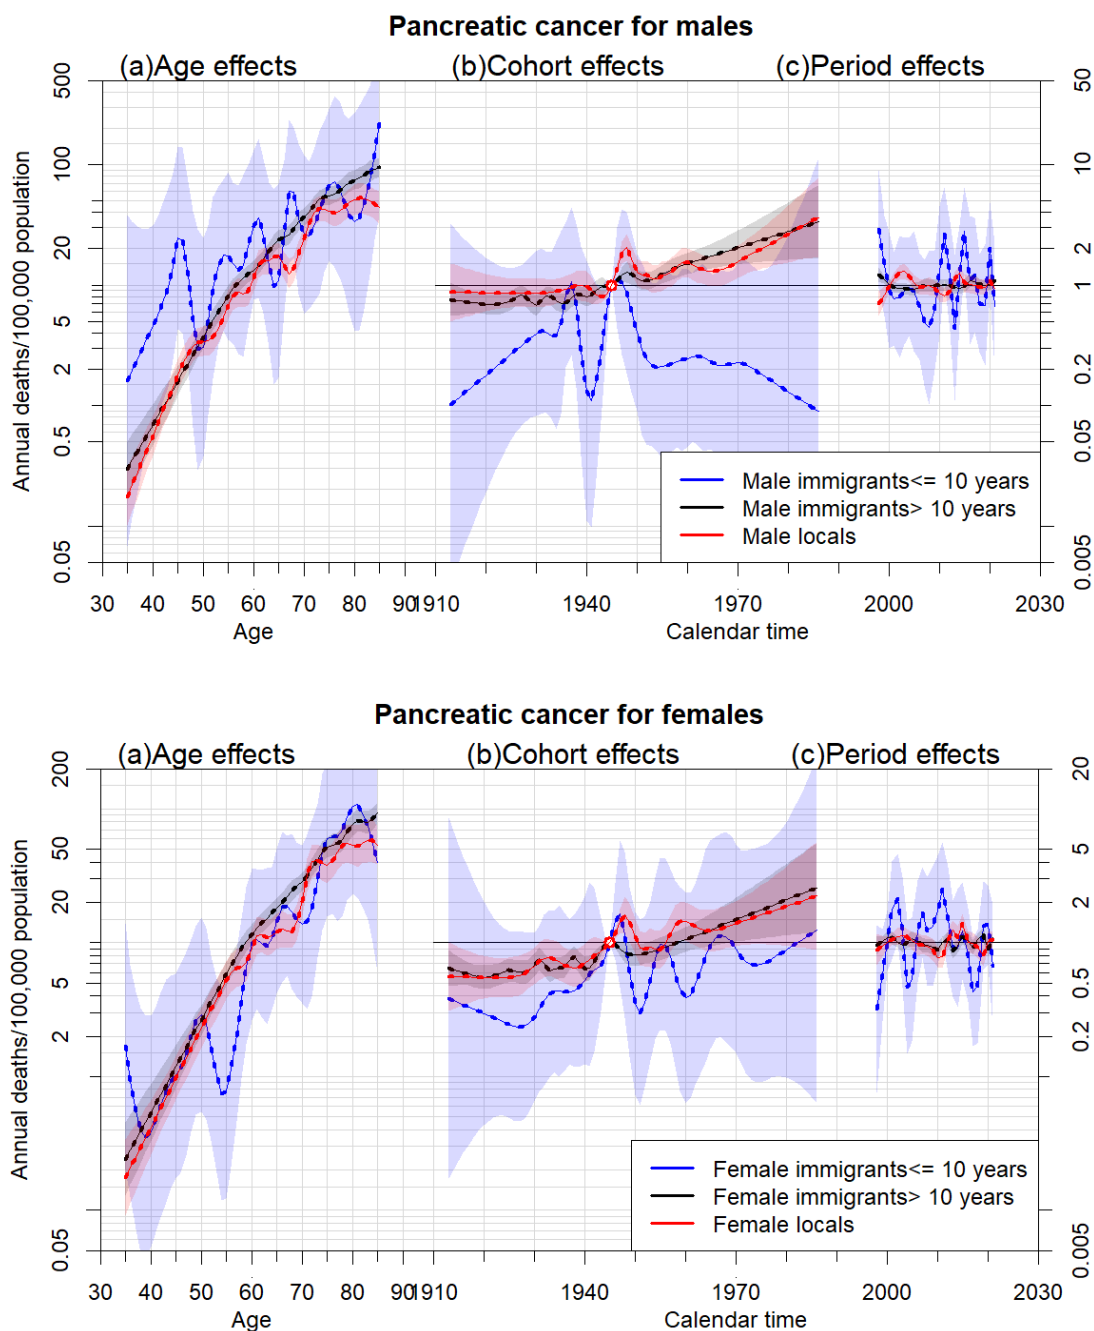

**eFigure 1(c).** Parameter estimates of age (a), cohort (b) and period (c) effects based on an age-period-cohort model of male and female pancreatic cancer mortality rates by immigrant groups: locals, immigrants stay in Hong Kong for more than 10 years and immigrants stay in Hong Kong for less than or equal to 10 years. Age effect was assessed by mortality (left axis). Cohort and period effects were assessed by relative risk (right axis), 95% confidence intervals are shown as shaded bands.

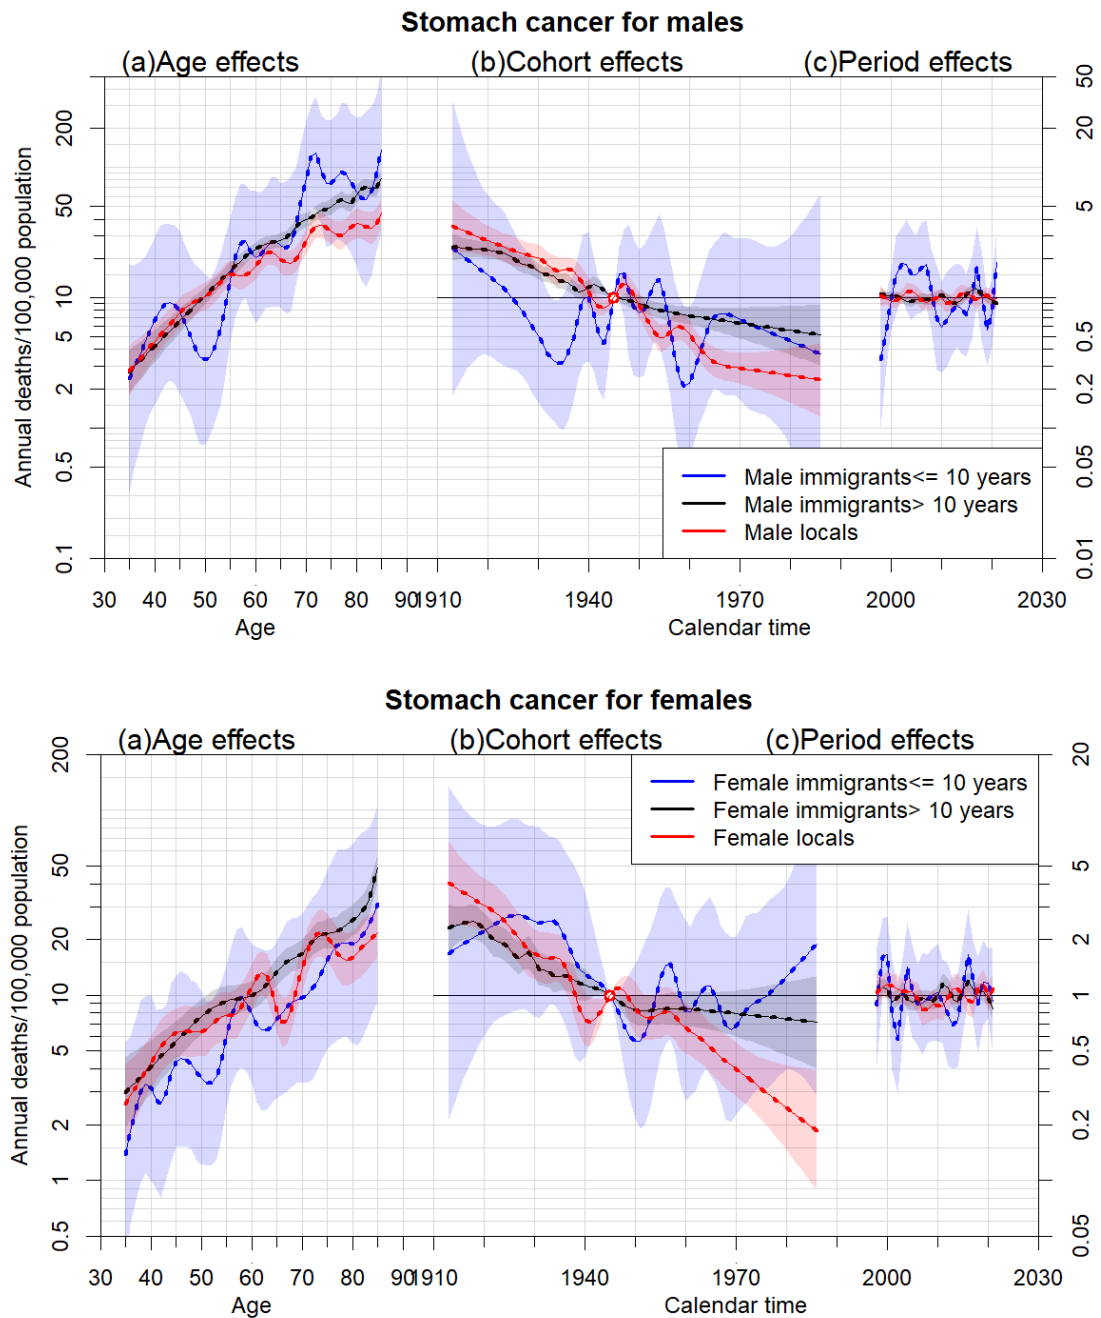

**eFigure 1(d).** Parameter estimates of age (a), cohort (b) and period (c) effects based on an age-period-cohort model of male and female stomach cancer mortality rates by immigrant groups: locals, immigrants stay in Hong Kong for more than 10 years and immigrants stay in Hong Kong for less than or equal to 10 years. Age effect was assessed by mortality (left axis). Cohort and period effects were assessed by relative risk (right axis), 95% confidence intervals are shown as shaded bands.

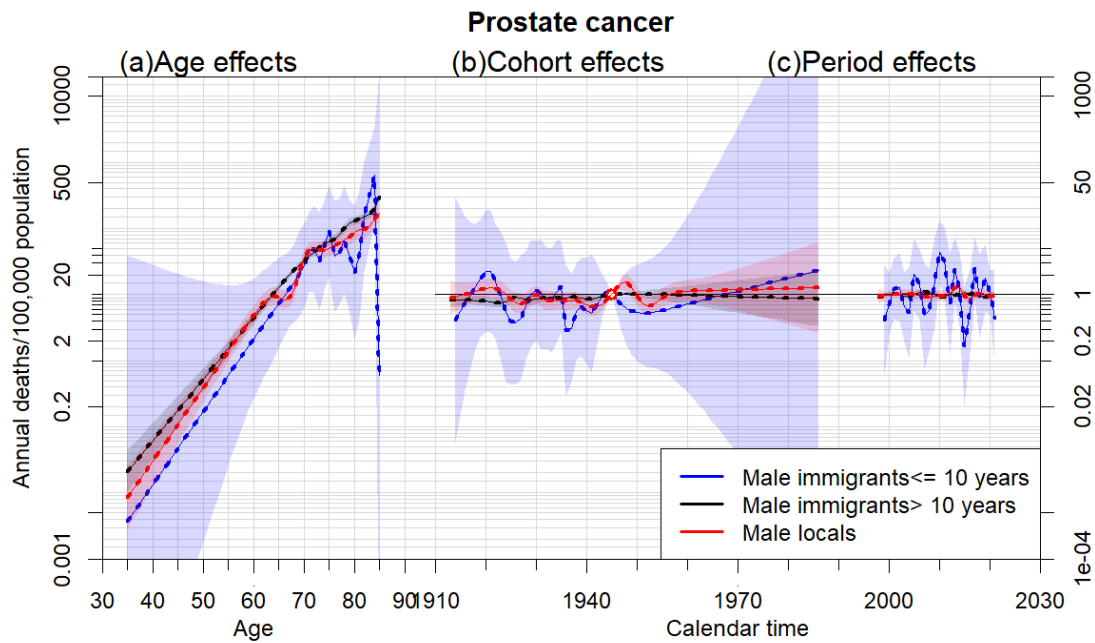

**eFigure 1(e).** Parameter estimates of age (a), cohort (b) and period (c) effects based on an age-period-cohort model of male prostate cancer mortality rates by immigrant groups: locals, immigrants stay in Hong Kong for more than 10 years and immigrants stay in Hong Kong for less than or equal to 10 years. Age effect was assessed by mortality (left axis). Cohort and period effects were assessed by relative risk (right axis), 95% confidence intervals are shown as shaded bands.

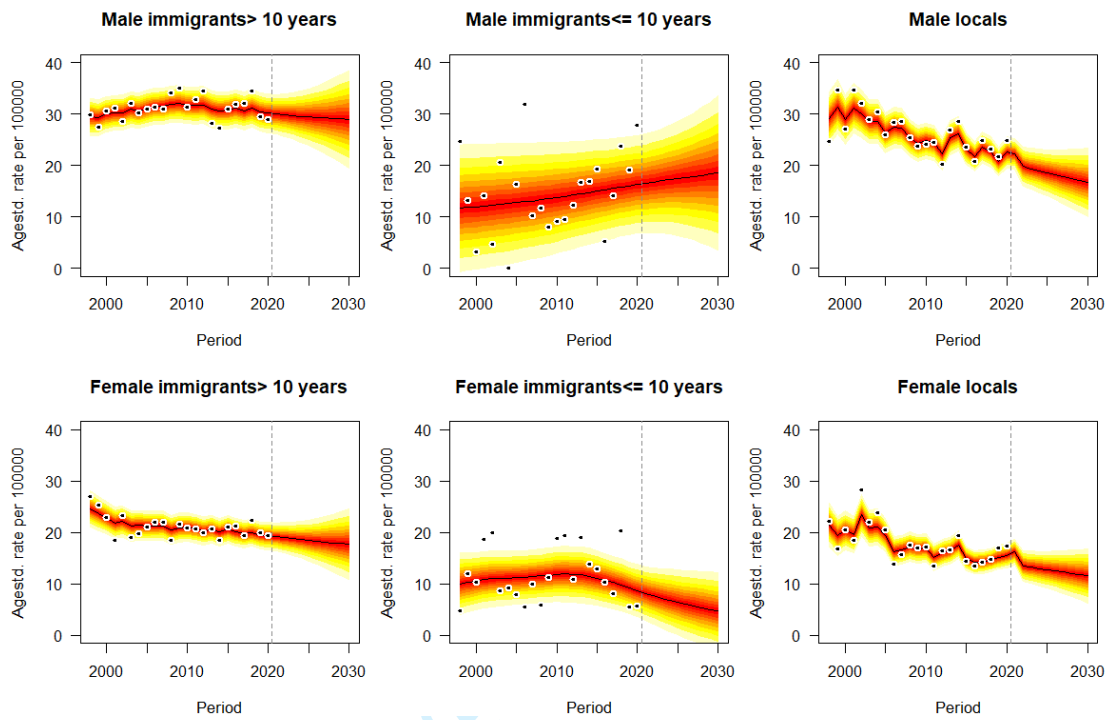

**eFigure 2(a).** Projections of colon cancer mortality rates by gender and immigrant status from 2022 to 2030. Observations are shown as dots with the predictive distribution between the 5% and 95% quantile, whereby each lighter shade of red represents an additional 10% predictive CI. The predictive mean is shown as black solid line and the vertical dashed line indicates where prediction started.



**eFigure 2(b).** Projections of colon cancer mortality rates for the population younger than 60 by gender and immigrant status from 2022 to 2030. Observations are shown as dots with the predictive distribution between the 5% and 95% quantile, whereby each lighter shade of red represents an additional 10% predictive CI. The predictive mean is shown as black solid line and the vertical dashed line indicates where prediction started.

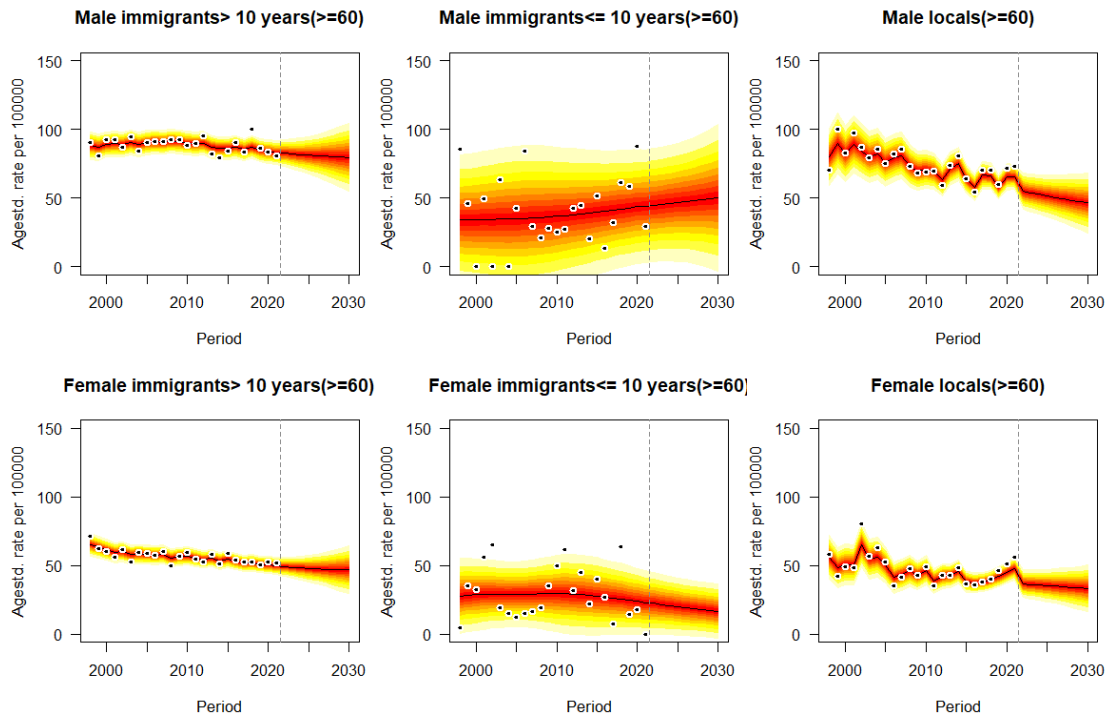

**eFigure 2(c).** Projections of colon cancer mortality rates for the population older than or equal to 60 by gender and immigrant status from 2022 to 2030. Observations are shown as dots with the predictive distribution between the 5% and 95% quantile, whereby each lighter shade of red represents an additional 10% predictive CI. The predictive mean is shown as black solid line and the vertical dashed line indicates where prediction started.

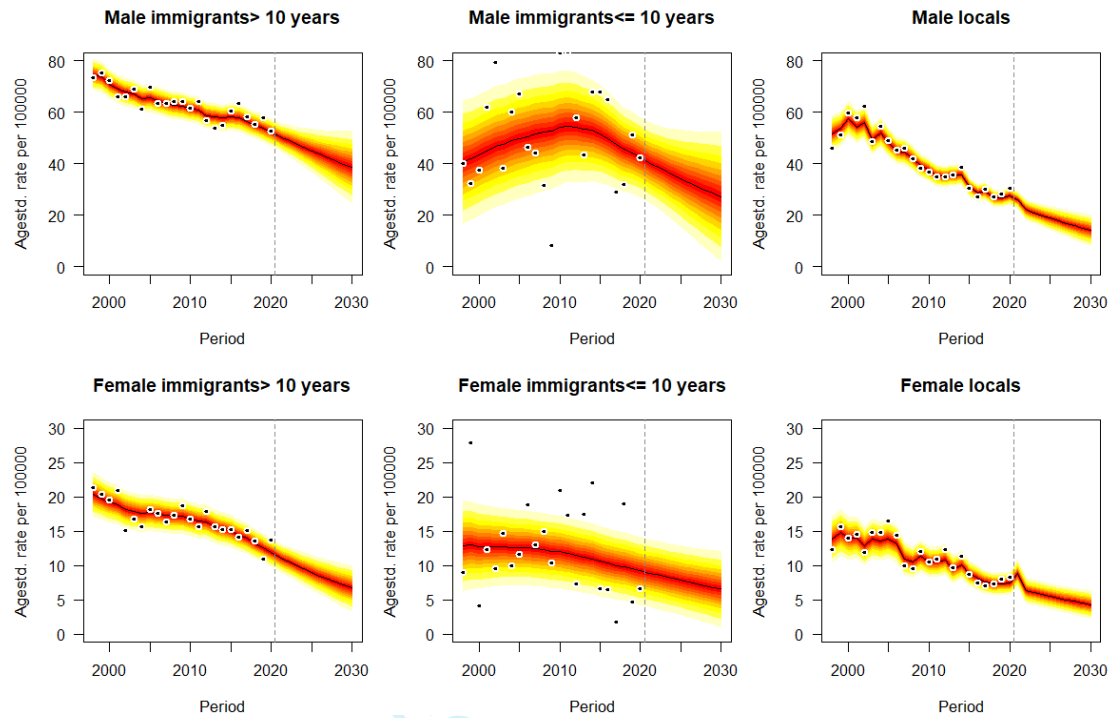

**eFigure 3(a).** Projections of liver cancer mortality rates by gender and immigrant status from 2022 to 2030. Observations are shown as dots with the predictive distribution between the 5% and 95% quantile, whereby each lighter shade of red represents an additional 10% predictive CI. The predictive mean is shown as black solid line and the vertical dashed line indicates where prediction started.

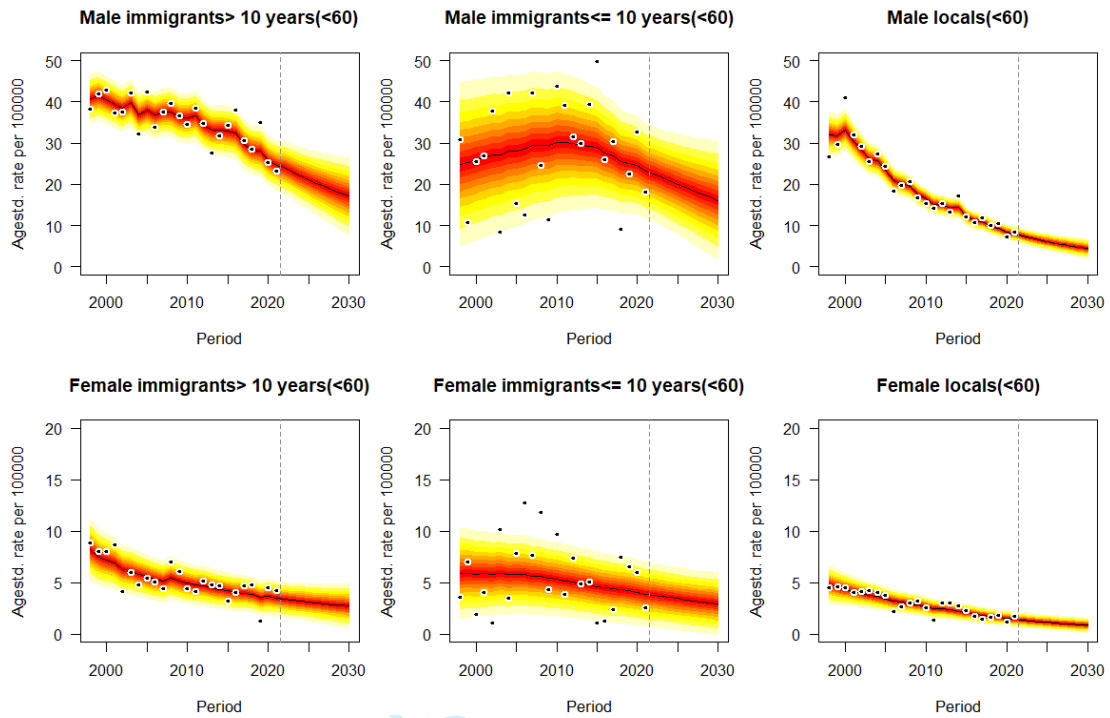

**eFigure 3(b).** Projections of liver cancer mortality rates for the population younger than 60 by gender and immigrant status from 2022 to 2030. Observations are shown as dots with the predictive distribution between the 5% and 95% quantile, whereby each lighter shade of red represents an additional 10% predictive CI. The predictive mean is shown as black solid line and the vertical dashed line indicates where prediction started.



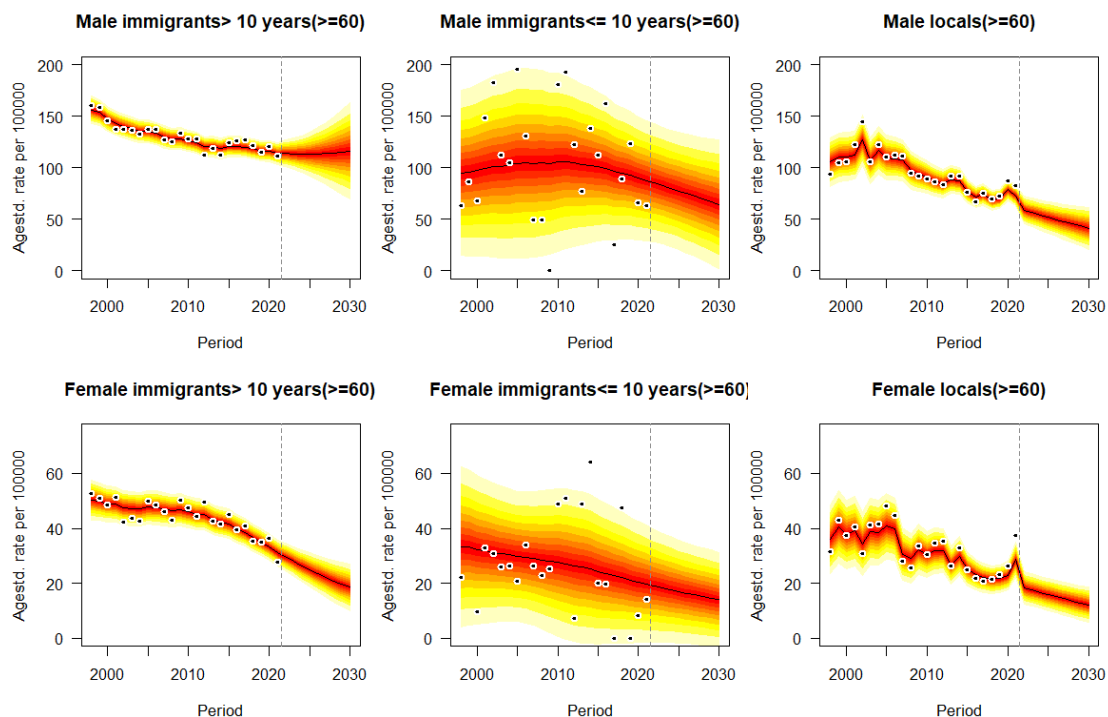

**eFigure 3(c).** Projections of liver cancer mortality rates for the population older than or equal to 60 by gender and immigrant status from 2022 to 2030. Observations are shown as dots with the predictive distribution between the 5% and 95% quantile, whereby each lighter shade of red represents an additional 10% predictive CI. The predictive mean is shown as black solid line and the vertical dashed line indicates where prediction started.



**eFigure 4(a).** Projections of pancreatic cancer mortality rates by gender and immigrant status from 2022 to 2030. Observations are shown as dots with the predictive distribution between the 5% and 95% quantile, whereby each lighter shade of red represents an additional 10% predictive CI. The predictive mean is shown as black solid line and the vertical dashed line indicates where prediction started.



**eFigure 4(b).** Projections of pancreatic cancer mortality rates for the population younger than 60 by gender and immigrant status from 2022 to 2030. Observations are shown as dots with the predictive distribution between the 5% and 95% quantile, whereby each lighter shade of red represents an additional 10% predictive CI. The predictive mean is shown as black solid line and the vertical dashed line indicates where prediction started.

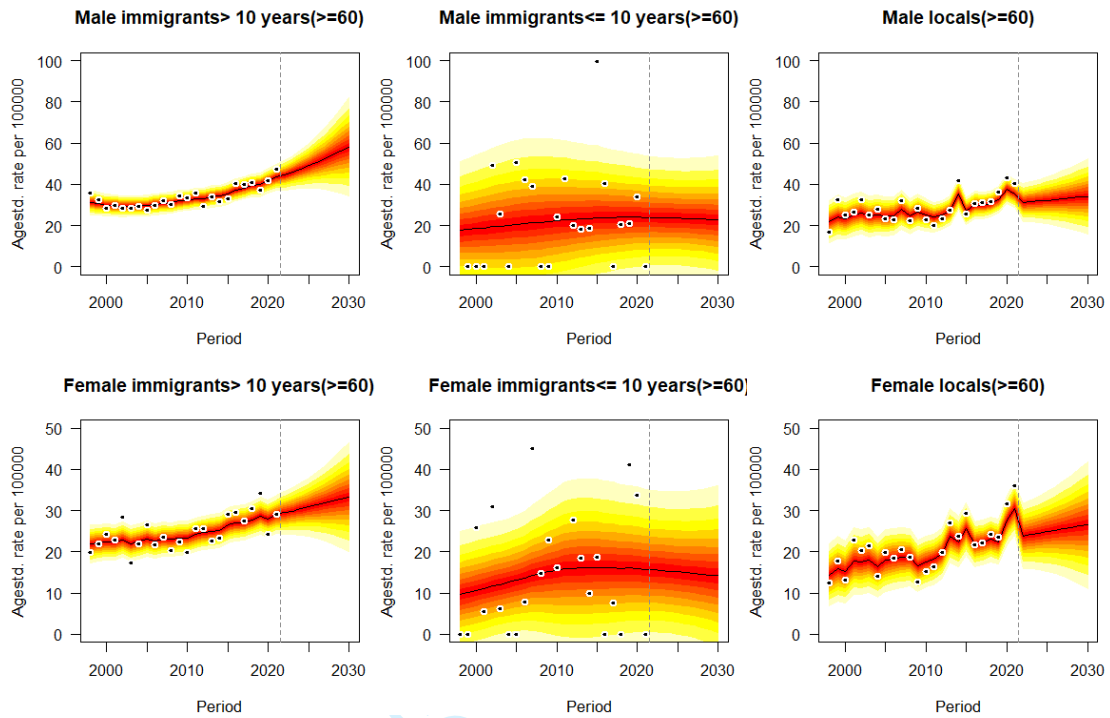

**eFigure 4(c).** Projections of pancreatic cancer mortality rates for the population older than or equal to 60 by gender and immigrant status from 2022 to 2030. Observations are shown as dots with the predictive distribution between the 5% and 95% quantile, whereby each lighter shade of red represents an additional 10% predictive CI. The predictive mean is shown as black solid line and the vertical dashed line indicates where prediction started.

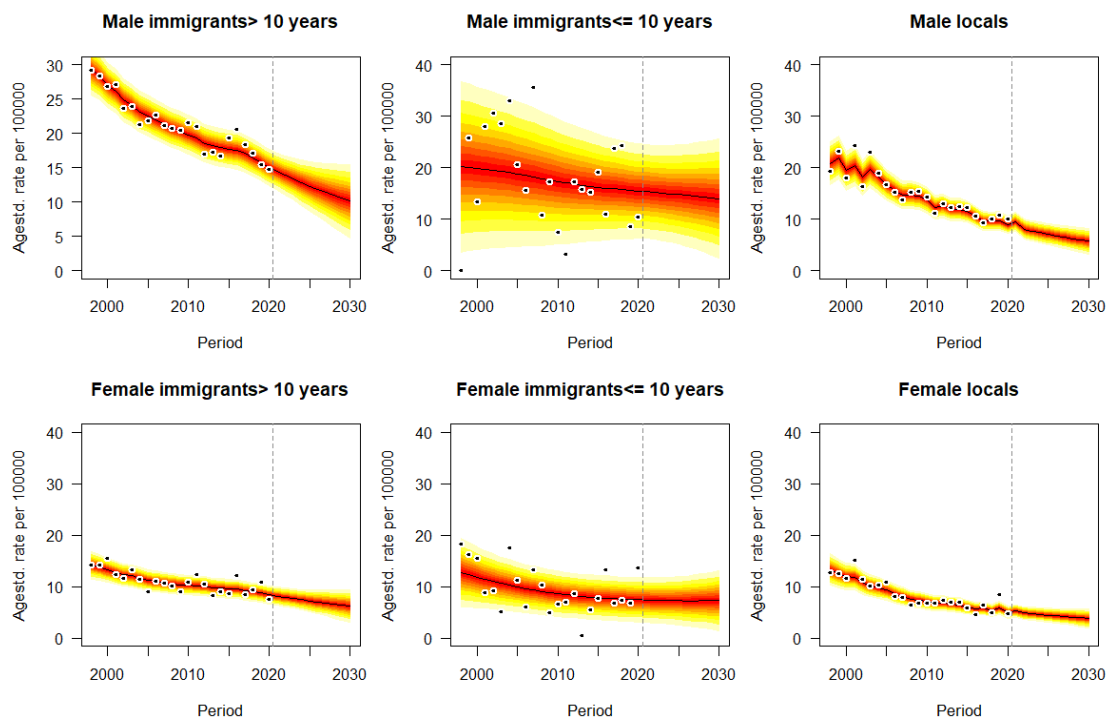

**eFigure 5(a).** Projections of stomach cancer mortality rates by gender and immigrant status from 2022 to 2030. Observations are shown as dots with the predictive distribution between the 5% and 95% quantile, whereby each lighter shade of red represents an additional 10% predictive CI. The predictive mean is shown as black solid line and the vertical dashed line indicates where prediction started.



**eFigure 5(b).** Projections of stomach cancer mortality rates for the population younger than 60 by gender and immigrant status from 2022 to 2030. Observations are shown as dots with the predictive distribution between the 5% and 95% quantile, whereby each lighter shade of red represents an additional 10% predictive CI. The predictive mean is shown as black solid line and the vertical dashed line indicates where prediction started.

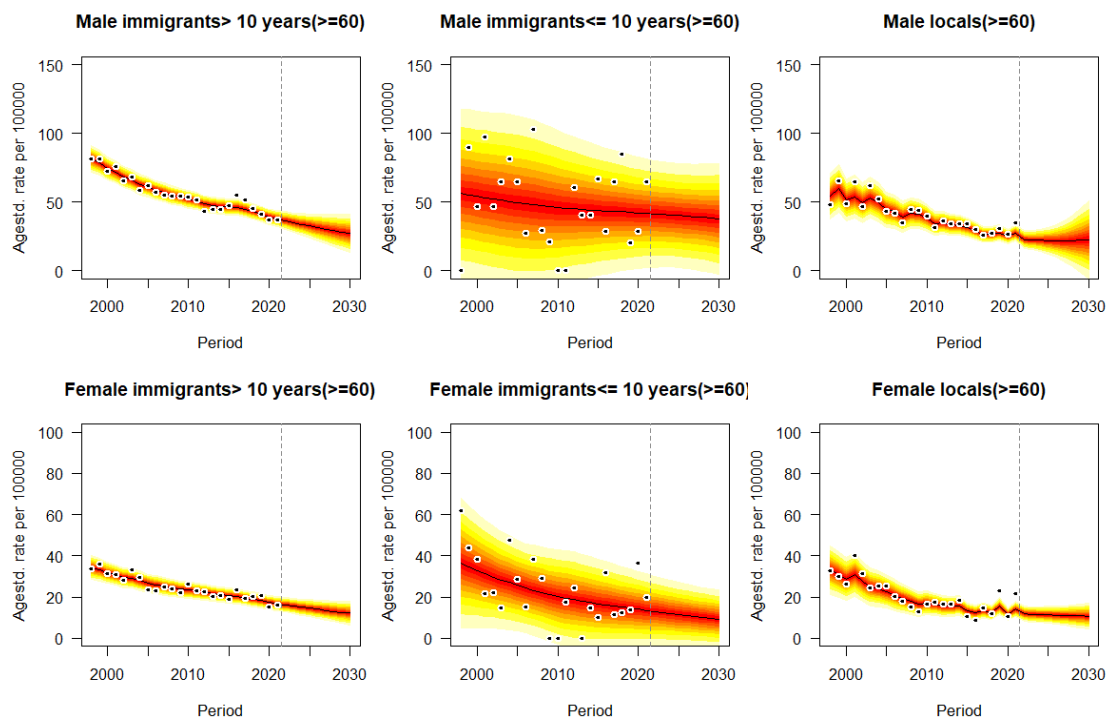

**eFigure 5(c).** Projections of stomach cancer mortality rates for the population older than or equal to 60 by gender and immigrant status from 2022 to 2030. Observations are shown as dots with the predictive distribution between the 5% and 95% quantile, whereby each lighter shade of red represents an additional 10% predictive CI. The predictive mean is shown as black solid line and the vertical dashed line indicates where prediction started.



**eFigure 6.** Projections of prostate cancer mortality rates for males by immigrant status and age groups (less than, greater than or equal to 60 years old) from 2022 to 2030. Observations are shown as dots with the predictive distribution between the 5% and 95% quantile, whereby each lighter shade of red represents an additional 10% predictive CI. The predictive mean is shown as black solid line and the vertical dashed line indicates where prediction started.



| Predictive mean of age-standardized mortality rates of lung cancer per 100,000 population |                   |                   |                   |                   |                   |                   |                   |                   |                   |                    |
|-------------------------------------------------------------------------------------------|-------------------|-------------------|-------------------|-------------------|-------------------|-------------------|-------------------|-------------------|-------------------|--------------------|
| Year                                                                                      | 2021              | 2022              | 2023              | 2024              | 2025              | 2026              | 2027              | 2028              | 2029              | 2030               |
| Female immigrants >10                                                                     | 41.80<br>(1.27)   | 41.34<br>(1.86)   | 40.58<br>(2.27)   | 39.87<br>(2.75)   | 39.19<br>(3.28)   | 38.53<br>(3.86)   | 37.89<br>(4.46)   | 37.26<br>(5.09)   | 36.65<br>(5.74)   | 36.04<br>(6.4)     |
| Female immigrants ≤ 10                                                                    | 23.92<br>(4.00)   | 22.22<br>(4.67)   | 20.56<br>(5.38)   | 19.01<br>(6.10)   | 17.57<br>(6.80)   | 16.24<br>(7.45)   | 15.00<br>(8.04)   | 13.85<br>(8.56)   | 12.79<br>(9.01)   | 11.81<br>(9.39)    |
| Female locals                                                                             | 34.67<br>(1.76)   | 30.22<br>(3.54)   | 30.63<br>(4.77)   | 31.05<br>(6.38)   | 31.48<br>(8.29)   | 31.9<br>(10.47)   | 32.32<br>(12.87)  | 32.73<br>(15.48)  | 33.15<br>(18.31)  | 33.55<br>(21.33)   |
| Male immigrants >10                                                                       | 102.90<br>(2.43)  | 100.18<br>(4.18)  | 97.18<br>(5.33)   | 94.34<br>(6.72)   | 91.71<br>(8.24)   | 89.15<br>(9.84)   | 86.66<br>(11.47)  | 84.19<br>(13.11)  | 81.81<br>(14.74)  | 79.55<br>(16.37)   |
| Male immigrants ≤10                                                                       | 81.26<br>(9.21)   | 79.90<br>(10.41)  | 79.81<br>(11.82)  | 79.72<br>(13.42)  | 79.62<br>(15.19)  | 79.50<br>(17.09)  | 79.32<br>(19.09)  | 79.08<br>(21.18)  | 78.78<br>(23.32)  | 78.41<br>(25.53)   |
| Male locals                                                                               | 60.96<br>(2.82)   | 52.27<br>(4.86)   | 50.83<br>(5.39)   | 49.56<br>(6.13)   | 48.18<br>(6.97)   | 46.64<br>(7.84)   | 45.13<br>(8.76)   | 43.83<br>(9.76)   | 42.67<br>(10.8)   | 41.43<br>(11.8)    |
| Female immigrants >10(<60y)                                                               | 15.51<br>(1.12)   | 14.51<br>(1.50)   | 13.90<br>(1.76)   | 13.29<br>(2.04)   | 12.71<br>(2.33)   | 12.13<br>(2.62)   | 11.57<br>(2.91)   | 11.02<br>(3.18)   | 10.49<br>(3.43)   | 9.98<br>(3.68)     |
| Female immigrants ≤ 10(<60y)                                                              | 8.14<br>(1.91)    | 7.79<br>(1.95)    | 7.18(2.23)        | 6.62(2.53)        | 6.10(2.81)        | 5.63(3.08)        | 5.19(3.32)        | 4.79<br>(3.53)    | 4.42<br>(3.72)    | 4.09<br>(3.88)     |
| Female locals(<60y)                                                                       | 10.25<br>(0.77)   | 9.48<br>(0.89)    | 9.17(1.02)        | 8.87(1.16)        | 8.57(1.32)        | 8.27(1.49)        | 7.97(1.65)        | 7.68<br>(1.82)    | 7.38<br>(1.98)    | 7.09<br>(2.13)     |
| Male immigrants >10(<60y)                                                                 | 27.81<br>(2.10)   | 26.36<br>(3.58)   | 24.96<br>(3.94)   | 23.64<br>(4.35)   | 22.38<br>(4.79)   | 21.17<br>(5.23)   | 20.03<br>(5.67)   | 18.96<br>(6.10)   | 17.96<br>(6.51)   | 17.03<br>(6.90)    |
| Male immigrants ≤ 10(<60y)                                                                | 15.01<br>(2.98)   | 13.38<br>(3.71)   | 12.02<br>(4.17)   | 10.79<br>(4.59)   | 9.68<br>(4.95)    | 8.69<br>(5.24)    | 7.79<br>(5.46)    | 6.98<br>(5.61)    | 6.25<br>(5.69)    | 5.59<br>(5.72)     |
| Male locals(<60y)                                                                         | 15.19<br>(0.78)   | 14.45<br>(1.15)   | 14.03<br>(1.29)   | 13.61<br>(1.46)   | 13.14<br>(1.64)   | 12.65<br>(1.82)   | 12.13<br>(2.01)   | 11.55<br>(2.17)   | 10.93<br>(2.31)   | 10.26<br>(2.43)    |
| Female immigrants >10(≥ 60y)                                                              | 108.85<br>(4.80)  | 107.21<br>(5.17)  | 106.26<br>(6.24)  | 105.52<br>(7.54)  | 104.94<br>(9.04)  | 104.51<br>(10.72) | 104.21<br>(12.57) | 104.07<br>(14.61) | 104.06<br>(16.78) | 104.16<br>(19.14)  |
| Female immigrants ≤ 10(≥60y)                                                              | 66.16<br>(13.25)  | 63.84<br>(15.72)  | 59.88<br>(17.50)  | 56.14<br>(19.31)  | 52.60<br>(21.03)  | 49.27<br>(22.66)  | 46.14<br>(24.16)  | 43.20<br>(25.52)  | 40.44<br>(26.74)  | 37.85<br>(27.81)   |
| Female locals(≥60y)                                                                       | 77.33<br>(9.40)   | 76.53<br>(10.11)  | 76.22<br>(10.85)  | 75.94<br>(11.79)  | 75.69<br>(12.94)  | 75.49<br>(14.28)  | 75.32<br>(15.80)  | 75.19<br>(17.48)  | 75.10<br>(19.33)  | 75.03<br>(21.32)   |
| Male immigrants >10(≥60y)                                                                 | 293.56<br>(9.13)  | 289.8<br>(11.7)   | 286.6<br>(15.19)  | 284.28<br>(19.51) | 282.78<br>(24.49) | 281.99<br>(30.07) | 281.88<br>(36.31) | 282.31<br>(43.15) | 283.37<br>(50.66) | 285.03<br>(58.86)  |
| Male immigrants ≤ 10(≥60y)                                                                | 244.88<br>(30.29) | 247.01<br>(36.85) | 251.24<br>(42.94) | 255.62<br>(50.06) | 260.14<br>(58.14) | 264.82<br>(67.14) | 269.61<br>(77.01) | 274.52<br>(87.75) | 279.55<br>(99.34) | 284.69<br>(111.81) |
| Male locals(≥60y)                                                                         | 150.75<br>(16.22) | 146.29<br>(18.46) | 143.54<br>(20.58) | 141.84<br>(23.97) | 140.07<br>(28.24) | 138.14<br>(33.39) | 136.65<br>(39.82) | 136.49<br>(47.87) | 137.24<br>(57.47) | 138.26<br>(68.52)  |

**eTable 1.** Predictive means and standard deviations (in brackets) of age-standardized mortality rates of lung cancer per 100,000 population for each gender, age group (less than, greater or equal to 60 years old) and immigrant status from 2022 to 2030. Reported means and standard deviations (in brackets) of age-standardized mortality rates in 2021 are also listed.

| Predictive mean of age-standardized mortality rates of colon cancer per 100,000 population |                  |                  |                  |                  |                  |                  |                  |                  |                  |                  |
|--------------------------------------------------------------------------------------------|------------------|------------------|------------------|------------------|------------------|------------------|------------------|------------------|------------------|------------------|
| Year                                                                                       | 2021             | 2022             | 2023             | 2024             | 2025             | 2026             | 2027             | 2028             | 2029             | 2030             |
| Female immigrants >10                                                                      | 20.03<br>(0.95)  | 18.95<br>(1.13)  | 18.77<br>(1.37)  | 18.59<br>(1.66)  | 18.42<br>(1.98)  | 18.27<br>(2.33)  | 18.12<br>(2.71)  | 17.98<br>(3.11)  | 17.85<br>(3.53)  | 17.73<br>(3.96)  |
| Female immigrants ≤ 10                                                                     | 8.11<br>(2.19)   | 7.70<br>(2.51)   | 7.25<br>(2.81)   | 6.82<br>(3.11)   | 6.42<br>(3.37)   | 6.03<br>(3.61)   | 5.67<br>(3.83)   | 5.33<br>(4.01)   | 5.01<br>(4.17)   | 4.71<br>(4.31)   |
| Female locals                                                                              | 13.77<br>(1.30)  | 13.47<br>(1.61)  | 13.24<br>(1.72)  | 13.01<br>(1.87)  | 12.77<br>(2.04)  | 12.53<br>(2.24)  | 12.29<br>(2.46)  | 12.06<br>(2.68)  | 11.82<br>(2.92)  | 11.59<br>(3.16)  |
| Male immigrants >10                                                                        | 31.22<br>(1.28)  | 29.82<br>(1.46)  | 29.66<br>(1.79)  | 29.52<br>(2.19)  | 29.41<br>(2.63)  | 29.30<br>(3.11)  | 29.21<br>(3.64)  | 29.14<br>(4.19)  | 29.06<br>(4.78)  | 28.98<br>(5.39)  |
| Male immigrants ≤10                                                                        | 15.47<br>(2.14)  | 16.77<br>(3.77)  | 17.02<br>(4.18)  | 17.23<br>(4.64)  | 17.45<br>(5.14)  | 17.67<br>(5.69)  | 17.88<br>(6.27)  | 18.09<br>(6.91)  | 18.31<br>(7.56)  | 18.50<br>(8.26)  |
| Male locals                                                                                | 21.28<br>(1.38)  | 19.81<br>(2.07)  | 19.39<br>(2.22)  | 18.97<br>(2.42)  | 18.57<br>(2.61)  | 18.18<br>(2.85)  | 17.81<br>(3.12)  | 17.43<br>(3.40)  | 17.06<br>(3.71)  | 16.71<br>(4.03)  |
| Female immigrants >10(<60y)                                                                | 7.09<br>(0.99)   | 7.36<br>(1.12)   | 7.46<br>(1.28)   | 7.56<br>(1.46)   | 7.65<br>(1.68)   | 7.74<br>(1.92)   | 7.83<br>(2.19)   | 7.92<br>(2.48)   | 8.01<br>(2.79)   | 8.09<br>(3.13)   |
| Female immigrants ≤ 10(<60y)                                                               | 3.11<br>(0.67)   | 2.82<br>(0.86)   | 2.65<br>(0.91)   | 2.51<br>(0.97)   | 2.36<br>(1.02)   | 2.22<br>(1.07)   | 2.08<br>(1.11)   | 1.95<br>(1.14)   | 1.83<br>(1.18)   | 1.72<br>(1.22)   |
| Female locals(<60y)                                                                        | 4.10<br>(0.41)   | 3.87<br>(0.50)   | 3.73<br>(0.54)   | 3.61<br>(0.59)   | 3.47<br>(0.65)   | 3.34<br>(0.70)   | 3.22<br>(0.76)   | 3.11<br>(0.82)   | 2.99<br>(0.88)   | 2.88<br>(0.94)   |
| Male immigrants >10(<60y)                                                                  | 8.29<br>(0.91)   | 7.98<br>(1.17)   | 7.85<br>(1.38)   | 7.71<br>(1.60)   | 7.54<br>(1.83)   | 7.36<br>(2.08)   | 7.17(2.32)       | 6.97(2.57)       | 6.76(2.81)       | 6.55(3.05)       |
| Male immigrants ≤ 10(<60y)                                                                 | 5.03<br>(1.44)   | 5.18<br>(1.58)   | 5.22<br>(1.75)   | 5.26<br>(1.93)   | 5.30<br>(2.14)   | 5.34<br>(2.36)   | 5.38(2.59)       | 5.43(2.84)       | 5.47(3.11)       | 5.51(3.38)       |
| Male locals(<60y)                                                                          | 5.14<br>(0.43)   | 4.88<br>(0.63)   | 4.66<br>(0.79)   | 4.46<br>(0.96)   | 4.26<br>(1.13)   | 4.08<br>(1.31)   | 3.91(1.48)       | 3.73(1.65)       | 3.57(1.82)       | 3.42(1.97)       |
| Female immigrants >10(≥60y)                                                                | 52.16<br>(2.59)  | 49.21<br>(2.99)  | 48.70<br>(3.56)  | 48.26<br>(4.26)  | 47.87<br>(5.05)  | 47.54<br>(5.94)  | 47.26<br>(6.90)  | 47.05<br>(7.94)  | 46.91<br>(9.06)  | 46.81<br>(10.26) |
| Female immigrants ≤ 10(≥60y)                                                               | 24.01<br>(5.83)  | 22.44<br>(6.56)  | 21.69<br>(6.96)  | 20.95<br>(7.38)  | 20.23<br>(7.80)  | 19.52<br>(8.23)  | 18.84<br>(8.66)  | 18.17<br>(9.08)  | 17.51<br>(9.49)  | 16.86<br>(9.90)  |
| Female locals(≥60y)                                                                        | 37.42<br>(5.31)  | 36.69<br>(5.74)  | 36.29<br>(6.06)  | 35.87<br>(6.46)  | 35.46<br>(6.95)  | 35.04<br>(7.5)   | 34.61<br>(8.12)  | 34.19<br>(8.79)  | 33.77<br>(9.51)  | 33.34<br>(10.27) |
| Male immigrants >10(≥60y)                                                                  | 84.17<br>(3.55)  | 82.72<br>(4.09)  | 82.16<br>(4.95)  | 81.64<br>(5.97)  | 81.19<br>(7.12)  | 80.81<br>(8.39)  | 80.47<br>(9.77)  | 80.15<br>(11.24) | 79.85<br>(12.81) | 79.56<br>(14.45) |
| Male immigrants ≤ 10(≥60y)                                                                 | 43.25<br>(11.07) | 44.93<br>(13.09) | 45.62<br>(14.52) | 46.30<br>(16.09) | 46.96<br>(17.80) | 47.61<br>(19.64) | 48.25<br>(21.62) | 48.88<br>(23.73) | 49.51<br>(25.97) | 50.13<br>(28.34) |
| Male locals(≥60y)                                                                          | 55.79<br>(6.86)  | 54.89<br>(7.65)  | 53.75<br>(8.03)  | 52.63<br>(8.52)  | 51.54<br>(9.12)  | 50.47<br>(9.8)   | 49.43<br>(10.55) | 48.42<br>(11.37) | 47.42<br>(12.25) | 46.44<br>(13.16) |

**eTable 2.** Predictive means and standard deviations (in brackets) of age-standardized mortality rates of colon cancer per 100,000 population for each gender, age group (less than, greater or equal to 60 years old) and immigrant status from 2022 to 2030. Reported means and standard deviations (in brackets) of age-standardized mortality rates in 2021 are also listed.

| Predictive mean of age-standardized mortality rates of liver cancer per 100,000 population |                  |                  |                  |                  |                   |                   |                   |                   |                   |                   |
|--------------------------------------------------------------------------------------------|------------------|------------------|------------------|------------------|-------------------|-------------------|-------------------|-------------------|-------------------|-------------------|
| Year                                                                                       | 2021             | 2022             | 2023             | 2024             | 2025              | 2026              | 2027              | 2028              | 2029              | 2030              |
| Female immigrants >10                                                                      | 11.34<br>(0.66)  | 10.68<br>(0.71)  | 10.09<br>(0.85)  | 9.54<br>(1.01)   | 9.01<br>(1.16)    | 8.50<br>(1.31)    | 8.02(1.45)        | 7.57(1.59)        | 7.14(1.72)        | 6.74(1.83)        |
| Female immigrants ≤10                                                                      | 9.15<br>(1.55)   | 8.66<br>(1.82)   | 8.38<br>(1.95)   | 8.11<br>(2.08)   | 7.84<br>(2.22)    | 7.58<br>(2.36)    | 7.32(2.49)        | 7.07(2.63)        | 6.82(2.76)        | 6.58(2.88)        |
| Female locals                                                                              | 6.72<br>(0.69)   | 6.36<br>(0.88)   | 6.08<br>(0.90)   | 5.81<br>(0.93)   | 5.53<br>(0.97)    | 5.26<br>(1.01)    | 5.01(1.06)        | 4.77(1.11)        | 4.53(1.15)        | 4.3(1.21)         |
| Male immigrants >10                                                                        | 52.17<br>(1.78)  | 49.22<br>(2.36)  | 47.76<br>(2.93)  | 46.35<br>(3.59)  | 45.01<br>(4.31)   | 43.67<br>(5.05)   | 42.37<br>(5.81)   | 41.1(6.56)        | 39.89<br>(7.33)   | 38.71<br>(8.08)   |
| Male immigrants ≤10                                                                        | 42.33<br>(5.87)  | 39.03<br>(6.49)  | 37.39<br>(7.47)  | 35.81<br>(8.51)  | 34.26<br>(9.58)   | 32.76<br>(10.63)  | 31.31<br>(11.65)  | 29.91<br>(12.62)  | 28.56<br>(13.54)  | 27.25<br>(14.40)  |
| Male locals                                                                                | 24.22<br>(1.77)  | 22.16<br>(2.09)  | 21.02<br>(2.22)  | 19.91<br>(2.39)  | 18.85<br>(2.58)   | 17.83<br>(2.79)   | 16.85<br>(3.03)   | 15.92<br>(3.21)   | 15.03<br>(3.40)   | 14.18<br>(3.59)   |
| Female immigrants >10(<60y)                                                                | 3.62<br>(0.45)   | 3.39<br>(0.52)   | 3.29<br>(0.57)   | 3.20<br>(0.63)   | 3.12<br>(0.69)    | 3.04<br>(0.75)    | 2.96(0.82)        | 2.89(0.89)        | 2.82(0.96)        | 2.75(1.03)        |
| Female immigrants ≤10(<60y)                                                                | 4.10<br>(0.79)   | 3.81<br>(0.91)   | 3.69<br>(0.96)   | 3.57<br>(1.02)   | 3.46<br>(1.08)    | 3.36<br>(1.15)    | 3.25(1.22)        | 3.15(1.29)        | 3.06(1.36)        | 2.97(1.43)        |
| Female locals(<60y)                                                                        | 1.50<br>(0.13)   | 1.37<br>(0.2)    | 1.29<br>(0.21)   | 1.22<br>(0.23)   | 1.16<br>(0.24)    | 1.10<br>(0.26)    | 1.04(0.27)        | 0.99(0.29)        | 0.94(0.30)        | 0.89(0.31)        |
| Male immigrants >10(<60y)                                                                  | 26.32<br>(2.11)  | 24.04<br>(2.35)  | 23.02<br>(2.63)  | 22.05<br>(2.94)  | 21.13<br>(3.27)   | 20.25<br>(3.61)   | 19.41<br>(3.95)   | 18.62<br>(4.30)   | 17.86<br>(4.64)   | 17.14<br>(4.98)   |
| Male immigrants ≤10(<60y)                                                                  | 25.52<br>(2.99)  | 22.56<br>(3.96)  | 21.71<br>(4.44)  | 20.87<br>(4.94)  | 20.04<br>(5.45)   | 19.22<br>(5.95)   | 18.42<br>(6.45)   | 17.63<br>(6.91)   | 16.86<br>(7.36)   | 16.11<br>(7.78)   |
| Male locals(<60y)                                                                          | 8.25<br>(0.69)   | 7.47<br>(0.74)   | 6.97<br>(0.79)   | 6.52<br>(0.86)   | 6.11<br>(0.93)    | 5.73<br>(1.01)    | 5.38(1.08)        | 5.04(1.15)        | 4.73(1.21)        | 4.44(1.27)        |
| Female immigrants >10(≥60y)                                                                | 33.67<br>(1.88)  | 29.63<br>(2.01)  | 27.99<br>(2.36)  | 26.42<br>(2.75)  | 24.92<br>(3.14)   | 23.49<br>(3.52)   | 22.13<br>(3.88)   | 20.85<br>(4.23)   | 19.64<br>(4.55)   | 18.50<br>(4.85)   |
| Female immigrants ≤10(≥60y)                                                                | 21.72<br>(5.11)  | 19.08<br>(5.81)  | 18.38<br>(6.14)  | 17.71<br>(6.48)  | 17.03<br>(6.83)   | 16.39<br>(7.16)   | 15.76<br>(7.49)   | 15.16<br>(7.80)   | 14.57<br>(8.11)   | 14.01<br>(8.39)   |
| Female locals(≥60y)                                                                        | 20.63<br>(3.03)  | 18.41<br>(3.23)  | 17.55<br>(3.26)  | 16.72<br>(3.32)  | 15.91<br>(3.40)   | 15.11<br>(3.49)   | 14.34<br>(3.59)   | 13.59<br>(3.69)   | 12.87<br>(3.81)   | 12.17<br>(3.93)   |
| Male immigrants >10(≥60y)                                                                  | 115.39<br>(4.54) | 113.96<br>(5.95) | 113.43<br>(7.65) | 113.17<br>(9.70) | 113.16<br>(12.04) | 113.37<br>(14.66) | 113.79<br>(17.56) | 114.39<br>(20.73) | 115.19<br>(24.18) | 116.17<br>(27.91) |
| Male immigrants ≤10(≥60y)                                                                  | 88.61<br>(15.58) | 85.14<br>(18.85) | 82.59<br>(20.6)  | 80.02<br>(22.44) | 77.42<br>(24.34)  | 74.83<br>(26.24)  | 72.23<br>(28.12)  | 69.64<br>(29.94)  | 67.07<br>(31.70)  | 64.52<br>(33.38)  |
| Male locals(≥60y)                                                                          | 62.88<br>(5.97)  | 58.95<br>(7.91)  | 56.51<br>(8.20)  | 54.14<br>(8.61)  | 51.84<br>(9.12)   | 49.61<br>(9.70)   | 47.46<br>(10.33)  | 45.38<br>(11.01)  | 43.38<br>(11.68)  | 41.45<br>(12.36)  |

**eTable 3.** Predictive means and standard deviations (in brackets) of age-standardized mortality rates of liver cancer per 100,000 population for each gender, age group (less than, greater or equal to 60 years old) and immigrant status from 2022 to 2030. Reported means and standard deviations (in brackets) of age-standardized mortality rates in 2021 are also listed.

| Predictive mean of age-standardized mortality rates of pancreatic cancer per 100,000 population |                 |                 |                 |                  |                  |                  |                  |                  |                  |                  |
|-------------------------------------------------------------------------------------------------|-----------------|-----------------|-----------------|------------------|------------------|------------------|------------------|------------------|------------------|------------------|
| Year                                                                                            | 2021            | 2022            | 2023            | 2024             | 2025             | 2026             | 2027             | 2028             | 2029             | 2030             |
| Female immigrants >10                                                                           | 10.89<br>(0.62) | 11.11<br>(0.75) | 11.36<br>(0.91) | 11.61<br>(1.09)  | 11.87<br>(1.31)  | 12.14<br>(1.56)  | 12.42<br>(1.84)  | 12.71<br>(2.15)  | 13.01<br>(2.48)  | 13.3(2.85)       |
| Female immigrants ≤ 10                                                                          | 5.51<br>(1.44)  | 5.44<br>(1.56)  | 5.44<br>(1.69)  | 5.43(1.84)       | 5.42(1.99)       | 5.41(2.15)       | 5.39(2.32)       | 5.36(2.49)       | 5.34(2.66)       | 5.31(2.84)       |
| Female locals                                                                                   | 8.79<br>(1.10)  | 9.01<br>(1.22)  | 9.15<br>(1.34)  | 9.29(1.48)       | 9.43(1.64)       | 9.57(1.83)       | 9.71(2.05)       | 9.85(2.28)       | 9.99(2.54)       | 10.14<br>(2.83)  |
| Male immigrants >10                                                                             | 16.30<br>(0.98) | 17.87<br>(1.19) | 18.48<br>(1.49) | 19.11<br>(1.87)  | 19.78<br>(2.32)  | 20.47<br>(2.83)  | 21.18<br>(3.42)  | 21.92<br>(4.07)  | 22.69<br>(4.81)  | 23.49<br>(5.61)  |
| Male immigrants ≤ 10                                                                            | 8.10<br>(2.02)  | 7.87<br>(2.37)  | 7.76<br>(2.53)  | 7.64(2.70)       | 7.51(2.87)       | 7.38(3.05)       | 7.24(3.23)       | 7.09(3.41)       | 6.95(3.58)       | 6.81(3.75)       |
| Male locals                                                                                     | 11.97<br>(1.26) | 12.29<br>(1.49) | 12.49<br>(1.64) | 12.69<br>(1.83)  | 12.91<br>(2.06)  | 13.11<br>(2.33)  | 13.33<br>(2.63)  | 13.55<br>(2.97)  | 13.78<br>(3.34)  | 14.02<br>(3.74)  |
| Female immigrants >10(<60y)                                                                     | 3.47<br>(0.33)  | 3.62<br>(0.57)  | 3.74<br>(0.66)  | 3.87(0.77)       | 4.01(0.89)       | 4.14(1.02)       | 4.28(1.18)       | 4.42(1.34)       | 4.57(1.53)       | 4.72(1.73)       |
| Female immigrants ≤ 10(<60y)                                                                    | 1.12<br>(0.33)  | 1.21<br>(0.48)  | 1.22<br>(0.52)  | 1.23(0.56)       | 1.24(0.61)       | 1.25(0.66)       | 1.26(0.71)       | 1.26(0.77)       | 1.27(0.83)       | 1.28(0.89)       |
| Female locals(<60y)                                                                             | 2.76<br>(0.27)  | 2.88<br>(0.36)  | 2.91<br>(0.41)  | 2.93(0.48)       | 2.96(0.55)       | 2.99(0.63)       | 3.02(0.71)       | 3.04(0.81)       | 3.07(0.90)       | 3.10(1.01)       |
| Male immigrants >10(<60y)                                                                       | 6.88<br>(0.98)  | 7.05<br>(1.11)  | 7.24<br>(1.32)  | 7.43(1.56)       | 7.62(1.84)       | 7.82(2.16)       | 8.01(2.50)       | 8.21(2.88)       | 8.40(3.30)       | 8.61(3.75)       |
| Male immigrants ≤ 10(<60y)                                                                      | 2.20<br>(0.71)  | 2.01<br>(0.85)  | 1.95<br>(0.91)  | 1.9(0.94)        | 1.84(0.99)       | 1.79(1.04)       | 1.74(1.09)       | 1.69(1.14)       | 1.64(1.19)       | 1.60(1.24)       |
| Male locals(<60y)                                                                               | 4.16<br>(0.35)  | 4.33<br>(0.48)  | 4.41<br>(0.57)  | 4.46(0.68)       | 4.53(0.81)       | 4.61(0.94)       | 4.69(1.09)       | 4.77(1.26)       | 4.85(1.44)       | 4.93(1.63)       |
| Female immigrants >10(≥60y)                                                                     | 28.58<br>(1.83) | 29.45<br>(2.11) | 29.91<br>(2.54) | 30.38<br>(3.06)  | 30.85<br>(3.66)  | 31.33<br>(4.33)  | 31.81<br>(5.08)  | 32.29<br>(5.91)  | 32.78<br>(6.79)  | 33.27<br>(7.74)  |
| Female immigrants ≤ 10(≥60y)                                                                    | 16.79<br>(5.29) | 15.65<br>(6.08) | 15.49<br>(6.71) | 15.33<br>(7.36)  | 15.16<br>(8.03)  | 14.97<br>(8.73)  | 14.79<br>(9.43)  | 14.59<br>(10.14) | 14.39<br>(10.86) | 14.19<br>(11.58) |
| Female locals(≥60y)                                                                             | 22.80<br>(4.23) | 23.85<br>(4.46) | 24.21<br>(4.81) | 24.56<br>(5.23)  | 24.91<br>(5.73)  | 25.25<br>(6.30)  | 25.58<br>(6.95)  | 25.90<br>(7.67)  | 26.22<br>(8.47)  | 26.54<br>(9.34)  |
| Male immigrants >10(≥60y)                                                                       | 42.70<br>(2.55) | 44.36<br>(3.02) | 45.85<br>(3.76) | 47.41<br>(4.69)  | 49.04<br>(5.78)  | 50.73<br>(7.05)  | 52.48<br>(8.50)  | 54.28<br>(10.13) | 56.16<br>(11.95) | 58.11<br>(13.98) |
| Male immigrants ≤ 10(≥60y)                                                                      | 24.68<br>(8.21) | 23.96<br>(9.01) | 23.87<br>(9.74) | 23.75<br>(10.52) | 23.61<br>(11.33) | 23.45<br>(12.17) | 23.28<br>(13.04) | 23.09<br>(13.93) | 22.89<br>(14.83) | 22.68<br>(15.75) |
| Male locals(≥60y)                                                                               | 30.10<br>(4.68) | 31.17<br>(5.22) | 31.55<br>(5.63) | 31.93<br>(6.14)  | 32.30<br>(6.75)  | 32.66<br>(7.45)  | 33.01<br>(8.23)  | 33.35<br>(9.11)  | 33.69<br>(10.08) | 34.03<br>(11.12) |

**eTable 4.** Predictive means and standard deviations (in brackets) of age-standardized mortality rates of pancreatic cancer per 100,000 population for each gender, age group (less than, greater or equal to 60 years old) and immigrant status from 2022 to 2030. Reported means and standard deviations (in brackets) of age-standardized mortality rates in 2021 are also listed.

| Predictive mean of age-standardized mortality rates of stomach cancer per 100,000 population |                  |                  |                  |                  |                  |                  |                  |                  |                  |                  |
|----------------------------------------------------------------------------------------------|------------------|------------------|------------------|------------------|------------------|------------------|------------------|------------------|------------------|------------------|
| Year                                                                                         | 2021             | 2022             | 2023             | 2024             | 2025             | 2026             | 2027             | 2028             | 2029             | 2030             |
| Female immigrants >10                                                                        | 8.20<br>(0.55)   | 7.95<br>(0.62)   | 7.71<br>(0.74)   | 7.47<br>(0.87)   | 7.25<br>(1.01)   | 7.03<br>(1.15)   | 6.83<br>(1.29)   | 6.62<br>(1.43)   | 6.43<br>(1.57)   | 6.24<br>(1.71)   |
| Female immigrants ≤ 10                                                                       | 7.51<br>(1.44)   | 7.36<br>(1.56)   | 7.33<br>(1.69)   | 7.30<br>(1.85)   | 7.28<br>(2.01)   | 7.27<br>(2.20)   | 7.27<br>(2.40)   | 7.28<br>(2.61)   | 7.31<br>(2.84)   | 7.33<br>(3.09)   |
| Female locals                                                                                | 5.26<br>(0.40)   | 4.91<br>(0.52)   | 4.75<br>(0.57)   | 4.61<br>(0.63)   | 4.47<br>(0.71)   | 4.34<br>(0.77)   | 4.21<br>(0.84)   | 4.08<br>(0.91)   | 3.95<br>(0.99)   | 3.83<br>(1.06)   |
| Male immigrants >10                                                                          | 15.22<br>(0.64)  | 13.89<br>(0.97)  | 13.34(1.21)      | 12.81<br>(1.46)  | 12.31<br>(1.73)  | 11.83<br>(1.99)  | 11.38<br>(2.26)  | 10.95<br>(2.51)  | 10.54<br>(2.76)  | 10.15<br>(3.01)  |
| Male immigrants ≤10                                                                          | 15.83<br>(3.04)  | 15.21<br>(3.38)  | 15.07<br>(3.67)  | 14.93<br>(3.98)  | 14.79<br>(4.31)  | 14.64<br>(4.65)  | 14.51<br>(5.02)  | 14.35<br>(5.39)  | 14.19<br>(5.78)  | 14.03<br>(6.17)  |
| Male locals                                                                                  | 8.14<br>(0.89)   | 8.07<br>(0.99)   | 7.73<br>(1.03)   | 7.41(1.07)       | 7.10<br>(1.13)   | 6.81<br>(1.19)   | 6.51<br>(1.26)   | 6.23<br>(1.33)   | 5.97<br>(1.39)   | 5.71<br>(1.46)   |
| Female immigrants >10(<60y)                                                                  | 4.81<br>(0.56)   | 4.69<br>(0.79)   | 4.62<br>(0.87)   | 4.55<br>(0.96)   | 4.47<br>(1.07)   | 4.39<br>(1.17)   | 4.31<br>(1.29)   | 4.22<br>(1.41)   | 4.13<br>(1.52)   | 4.03<br>(1.64)   |
| Female immigrants ≤ 10(<60y)                                                                 | 3.89<br>(0.80)   | 4.08<br>(0.93)   | 4.10<br>(1.03)   | 4.13<br>(1.14)   | 4.17<br>(1.27)   | 4.21<br>(1.41)   | 4.24<br>(1.55)   | 4.28<br>(1.70)   | 4.32<br>(1.87)   | 4.36<br>(2.05)   |
| Female locals(<60y)                                                                          | 2.28<br>(0.21)   | 2.08<br>(0.27)   | 1.98<br>(0.29)   | 1.88<br>(0.32)   | 1.79<br>(0.35)   | 1.71<br>(0.37)   | 1.61<br>(0.41)   | 1.53<br>(0.43)   | 1.44<br>(0.45)   | 1.37<br>(0.47)   |
| Male immigrants >10(<60y)                                                                    | 4.94<br>(0.57)   | 4.71<br>(0.79)   | 4.55<br>(0.89)   | 4.41<br>(0.99)   | 4.25<br>(1.10)   | 4.12<br>(1.21)   | 3.98<br>(1.32)   | 3.86<br>(1.43)   | 3.74<br>(1.54)   | 3.63<br>(1.65)   |
| Male immigrants ≤ 10(<60y)                                                                   | 4.81<br>(1.31)   | 4.70<br>(1.42)   | 4.66<br>(1.55)   | 4.63<br>(1.69)   | 4.59<br>(1.83)   | 4.55<br>(1.99)   | 4.52<br>(2.15)   | 4.48<br>(2.32)   | 4.44<br>(2.50)   | 4.41<br>(2.68)   |
| Male locals(<60y)                                                                            | 2.48<br>(0.21)   | 2.37<br>(0.29)   | 2.28<br>(0.32)   | 2.21<br>(0.35)   | 2.12<br>(0.38)   | 2.04<br>(0.42)   | 1.97<br>(0.45)   | 1.91<br>(0.49)   | 1.83<br>(0.52)   | 1.77(0.55)       |
| Female immigrants >10(≥60y)                                                                  | 17.80<br>(1.04)  | 16.23<br>(1.26)  | 15.65<br>(1.47)  | 15.08<br>(1.70)  | 14.55<br>(1.94)  | 14.03<br>(2.18)  | 13.54<br>(2.43)  | 13.07<br>(2.68)  | 12.62<br>(2.92)  | 12.19<br>(3.16)  |
| Female immigrants ≤ 10(≥60y)                                                                 | 14.72<br>(4.29)  | 13.01<br>(4.83)  | 12.52<br>(5.11)  | 12.03<br>(5.37)  | 11.55<br>(5.63)  | 11.08<br>(5.88)  | 10.63<br>(6.12)  | 10.19<br>(6.35)  | 9.76(6.56)       | 9.34<br>(6.75)   |
| Female locals(≥60y)                                                                          | 12.20<br>(1.66)  | 11.86<br>(1.84)  | 11.67<br>(1.98)  | 11.49<br>(2.15)  | 11.33<br>(2.35)  | 11.18<br>(2.58)  | 11.04<br>(2.84)  | 10.91<br>(3.11)  | 10.79(3.4)       | 10.68<br>(3.71)  |
| Male immigrants >10(≥ 60y)                                                                   | 37.23<br>(2.29)  | 36.59<br>(2.56)  | 35.17(3.18)      | 33.82<br>(3.86)  | 32.55<br>(4.57)  | 31.34<br>(5.28)  | 30.19<br>(6.01)  | 29.08<br>(6.70)  | 28.02<br>(7.40)  | 27.01<br>(8.07)  |
| Male immigrants ≤ 10(≥60y)                                                                   | 42.30<br>(10.88) | 41.43<br>(11.78) | 41.03<br>(12.71) | 40.61<br>(13.70) | 40.17<br>(14.75) | 39.71<br>(15.85) | 39.24<br>(16.99) | 38.75<br>(18.16) | 38.23<br>(19.35) | 37.71<br>(20.57) |
| Male locals(≥60y)                                                                            | 23.04<br>(3.29)  | 22.69<br>(3.56)  | 22.37(4.07)      | 22.16(4.84)      | 21.89<br>(5.86)  | 21.61<br>(7.22)  | 21.52<br>(9.02)  | 21.74<br>(11.29) | 22.17<br>(14.03) | 22.73<br>(17.28) |

**eTable 5.** Predictive means and standard deviations (in brackets) of age-standardized mortality rates of stomach cancer per 100,000 population for each gender, age group (less than, greater or equal to 60 years old) and immigrant status from 2022 to 2030. Reported means and standard deviations (in brackets) of age-standardized mortality rates in 2021 are also listed.

| Predictive mean of age-standardized mortality rates of prostate cancer per 100,000 population |                 |                 |                  |                 |                  |                  |                  |                  |                  |                 |
|-----------------------------------------------------------------------------------------------|-----------------|-----------------|------------------|-----------------|------------------|------------------|------------------|------------------|------------------|-----------------|
| Year                                                                                          | 2021            | 2022            | 2023             | 2024            | 2025             | 2026             | 2027             | 2028             | 2029             | 2030            |
| Male immigrants >10                                                                           | 14.81<br>(0.61) | 14.59<br>(0.79) | 14.57<br>(0.96)  | 14.56<br>(1.15) | 14.54<br>(1.37)  | 14.51<br>(1.61)  | 14.48<br>(1.86)  | 14.45<br>(2.13)  | 14.42<br>(2.42)  | 14.38<br>(2.72) |
| Male immigrants ≤10                                                                           | 9.03<br>(2.95)  | 8.78<br>(3.11)  | 8.58<br>(3.29)   | 8.39<br>(3.49)  | 8.19(3.69)       | 8.10(3.89)       | 7.82(4.11)       | 7.63(4.31)       | 7.45(4.51)       | 7.27(4.72)      |
| Male locals                                                                                   | 9.54<br>(1.40)  | 9.66<br>(1.57)  | 9.67<br>(1.66)   | 9.69<br>(1.77)  | 9.72(1.91)       | 9.75(2.06)       | 9.78(2.23)       | 9.82(2.43)       | 9.86(2.64)       | 9.9(2.88)       |
| Male immigrants >10(<60y)                                                                     | 0.57<br>(0.12)  | 0.52<br>(0.17)  | 0.51<br>(0.19)   | 0.50<br>(0.21)  | 0.49(0.22)       | 0.48(0.24)       | 0.47(0.25)       | 0.46(0.27)       | 0.45(0.29)       | 0.44(0.31)      |
| Male immigrants ≤10(<60y)                                                                     | 0.65<br>(0.59)  | 0.73<br>(0.77)  | 0.81<br>(0.93)   | 0.87<br>(1.10)  | 0.94(1.31)       | 1.01(1.51)       | 1.09(1.75)       | 1.16(2.02)       | 1.24(2.32)       | 1.33(2.64)      |
| Male locals(<60y)                                                                             | 0.63<br>(0.12)  | 0.66<br>(0.14)  | 0.66<br>(0.16)   | 0.66<br>(0.19)  | 0.67(0.21)       | 0.67(0.24)       | 0.67(0.27)       | 0.68(0.31)       | 0.68(0.33)       | 0.69(0.37)      |
| Male immigrants >10(≥60y)                                                                     | 49.43<br>(2.59) | 49.61<br>(2.73) | 49.63<br>(3.29)  | 49.64<br>(3.94) | 49.64<br>(4.68)  | 49.64<br>(5.51)  | 49.63<br>(6.38)  | 49.62<br>(7.32)  | 49.61<br>(8.32)  | 49.58(9.37)     |
| Male immigrants ≤10(≥60y)                                                                     | 28.29<br>(9.15) | 27.66<br>(9.78) | 26.53<br>(10.21) | 25.4<br>(10.63) | 24.28<br>(11.03) | 23.16<br>(11.41) | 22.07<br>(11.76) | 21.01<br>(12.09) | 19.96<br>(12.38) | 18.95(12.63)    |
| Male locals(≥60y)                                                                             | 31.57<br>(5.17) | 31.48<br>(5.49) | 31.40<br>(5.76)  | 31.32<br>(6.09) | 31.24<br>(6.48)  | 31.15<br>(6.94)  | 31.06<br>(7.44)  | 30.96<br>(8.01)  | 30.86<br>(8.61)  | 30.74(9.26)     |

**eTable 6.** Predictive means and standard deviations (in brackets) of age-standardized mortality rates of prostate cancer per 100,000 population for each age group (less than, greater or equal to 60 years old) and immigrant status from 2022 to 2030. Reported means and standard deviations (in brackets) of age-standardized mortality rates in 2021 are also listed.

# Reporting checklist for cohort study.

Based on the STROBE cohort guidelines.

## Instructions to authors

Complete this checklist by entering the page numbers from your manuscript where readers will find each of the items listed below.

Your article may not currently address all the items on the checklist. Please modify your text to include the missing information. If you are certain that an item does not apply, please write "n/a" and provide a short explanation.

Upload your completed checklist as an extra file when you submit to a journal.

In your methods section, say that you used the STROBE cohort reporting guidelines, and cite them as:

von Elm E, Altman DG, Egger M, Pocock SJ, Gøtzsche PC, Vandenbroucke JP. The Strengthening of Reporting of Observational Studies in Epidemiology (STROBE) Statement: guidelines for reporting observational studies.

|                           |                     |                                                                                                 | Page<br>Number |
|---------------------------|---------------------|-------------------------------------------------------------------------------------------------|----------------|
| <b>Title and abstract</b> |                     |                                                                                                 |                |
| Title                     | <a href="#">#1a</a> | Indicate the study's design with a commonly used term in the title or the abstract              | 1              |
| Abstract                  | <a href="#">#1b</a> | Provide in the abstract an informative and balanced summary of what was done and what was found | 2              |
| <b>Introduction</b>       |                     |                                                                                                 |                |
| Background / rationale    | <a href="#">#2</a>  | Explain the scientific background and rationale for the investigation being reported            | 4              |
| Objectives                | <a href="#">#3</a>  | State specific objectives, including any prespecified hypotheses                                | 4              |
| <b>Methods</b>            |                     |                                                                                                 |                |
| Study design              | <a href="#">#4</a>  | Present key elements of study design early in the paper                                         | 5              |
| Setting                   | <a href="#">#5</a>  | Describe the setting, locations, and relevant dates, including periods                          | 5              |



|    |                            |                      |                                                                                                                                                                                                                                                                      |     |
|----|----------------------------|----------------------|----------------------------------------------------------------------------------------------------------------------------------------------------------------------------------------------------------------------------------------------------------------------|-----|
| 1  |                            |                      | of recruitment, exposure, follow-up, and data collection                                                                                                                                                                                                             |     |
| 2  | Eligibility criteria       | <a href="#">#6a</a>  | Give the eligibility criteria, and the sources and methods of selection of participants. Describe methods of follow-up.                                                                                                                                              | 5   |
| 3  |                            |                      |                                                                                                                                                                                                                                                                      |     |
| 4  |                            |                      |                                                                                                                                                                                                                                                                      |     |
| 5  |                            |                      |                                                                                                                                                                                                                                                                      |     |
| 6  | Eligibility criteria       | <a href="#">#6b</a>  | For matched studies, give matching criteria and number of exposed and unexposed                                                                                                                                                                                      | n/a |
| 7  |                            |                      |                                                                                                                                                                                                                                                                      |     |
| 8  |                            |                      |                                                                                                                                                                                                                                                                      |     |
| 9  |                            |                      |                                                                                                                                                                                                                                                                      |     |
| 10 | Variables                  | <a href="#">#7</a>   | Clearly define all outcomes, exposures, predictors, potential confounders, and effect modifiers. Give diagnostic criteria, if applicable                                                                                                                             | 5   |
| 11 |                            |                      |                                                                                                                                                                                                                                                                      |     |
| 12 |                            |                      |                                                                                                                                                                                                                                                                      |     |
| 13 |                            |                      |                                                                                                                                                                                                                                                                      |     |
| 14 |                            |                      |                                                                                                                                                                                                                                                                      |     |
| 15 | Data sources / measurement | <a href="#">#8</a>   | For each variable of interest give sources of data and details of methods of assessment (measurement). Describe comparability of assessment methods if there is more than one group. Give information separately for for exposed and unexposed groups if applicable. | 5   |
| 16 |                            |                      |                                                                                                                                                                                                                                                                      |     |
| 17 |                            |                      |                                                                                                                                                                                                                                                                      |     |
| 18 |                            |                      |                                                                                                                                                                                                                                                                      |     |
| 19 |                            |                      |                                                                                                                                                                                                                                                                      |     |
| 20 |                            |                      |                                                                                                                                                                                                                                                                      |     |
| 21 |                            |                      |                                                                                                                                                                                                                                                                      |     |
| 22 | Bias                       | <a href="#">#9</a>   | Describe any efforts to address potential sources of bias                                                                                                                                                                                                            | 5   |
| 23 |                            |                      |                                                                                                                                                                                                                                                                      |     |
| 24 | Study size                 | <a href="#">#10</a>  | Explain how the study size was arrived at                                                                                                                                                                                                                            | 5   |
| 25 |                            |                      |                                                                                                                                                                                                                                                                      |     |
| 26 |                            |                      |                                                                                                                                                                                                                                                                      |     |
| 27 | Quantitative variables     | <a href="#">#11</a>  | Explain how quantitative variables were handled in the analyses. If applicable, describe which groupings were chosen, and why                                                                                                                                        | 5   |
| 28 |                            |                      |                                                                                                                                                                                                                                                                      |     |
| 29 |                            |                      |                                                                                                                                                                                                                                                                      |     |
| 30 |                            |                      |                                                                                                                                                                                                                                                                      |     |
| 31 | Statistical methods        | <a href="#">#12a</a> | Describe all statistical methods, including those used to control for confounding                                                                                                                                                                                    |     |
| 32 |                            |                      |                                                                                                                                                                                                                                                                      |     |
| 33 |                            |                      |                                                                                                                                                                                                                                                                      |     |
| 34 | 5                          |                      |                                                                                                                                                                                                                                                                      |     |
| 35 |                            |                      |                                                                                                                                                                                                                                                                      |     |
| 36 |                            |                      |                                                                                                                                                                                                                                                                      |     |
| 37 | Statistical methods        | <a href="#">#12b</a> | Describe any methods used to examine subgroups and interactions                                                                                                                                                                                                      | 5   |
| 38 |                            |                      |                                                                                                                                                                                                                                                                      |     |
| 39 |                            |                      |                                                                                                                                                                                                                                                                      |     |
| 40 |                            |                      |                                                                                                                                                                                                                                                                      |     |
| 41 | Statistical methods        | <a href="#">#12c</a> | Explain how missing data were addressed                                                                                                                                                                                                                              | 5   |
| 42 |                            |                      |                                                                                                                                                                                                                                                                      |     |
| 43 |                            |                      |                                                                                                                                                                                                                                                                      |     |
| 44 | Statistical methods        | <a href="#">#12d</a> | If applicable, explain how loss to follow-up was addressed                                                                                                                                                                                                           | n/a |
| 45 |                            |                      |                                                                                                                                                                                                                                                                      |     |
| 46 |                            |                      |                                                                                                                                                                                                                                                                      |     |
| 47 |                            |                      |                                                                                                                                                                                                                                                                      |     |
| 48 | Statistical methods        | <a href="#">#12e</a> | Describe any sensitivity analyses                                                                                                                                                                                                                                    |     |
| 49 |                            |                      |                                                                                                                                                                                                                                                                      |     |
| 50 |                            |                      |                                                                                                                                                                                                                                                                      |     |
| 51 |                            |                      |                                                                                                                                                                                                                                                                      |     |
| 52 | n/a                        |                      |                                                                                                                                                                                                                                                                      |     |
| 53 |                            |                      |                                                                                                                                                                                                                                                                      |     |
| 54 | <b>Results</b>             |                      |                                                                                                                                                                                                                                                                      |     |
| 55 |                            |                      |                                                                                                                                                                                                                                                                      |     |
| 56 | Participants               | <a href="#">#13a</a> | Report numbers of individuals at each stage of study—eg numbers potentially eligible, examined for eligibility, confirmed eligible,                                                                                                                                  | n/a |
| 57 |                            |                      |                                                                                                                                                                                                                                                                      |     |
| 58 |                            |                      |                                                                                                                                                                                                                                                                      |     |
| 59 |                            |                      |                                                                                                                                                                                                                                                                      |     |
| 60 |                            |                      |                                                                                                                                                                                                                                                                      |     |



included in the study, completing follow-up, and analysed. Give information separately for for exposed and unexposed groups if applicable.

|    |                  |                      |                                                                            |
|----|------------------|----------------------|----------------------------------------------------------------------------|
| 1  |                  |                      |                                                                            |
| 2  |                  |                      |                                                                            |
| 3  |                  |                      |                                                                            |
| 4  |                  |                      |                                                                            |
| 5  | Participants     | <a href="#">#13b</a> | Give reasons for non-participation at each stage 5                         |
| 6  |                  |                      |                                                                            |
| 7  | Participants     | <a href="#">#13c</a> | Consider use of a flow diagram                                             |
| 8  |                  |                      |                                                                            |
| 9  | n/a              |                      |                                                                            |
| 10 |                  |                      |                                                                            |
| 11 |                  |                      |                                                                            |
| 12 | Descriptive data | <a href="#">#14a</a> | Give characteristics of study participants (eg demographic, clinical, 5    |
| 13 |                  |                      | social) and information on exposures and potential confounders. Give       |
| 14 |                  |                      | information separately for exposed and unexposed groups if                 |
| 15 |                  |                      | applicable.                                                                |
| 16 |                  |                      |                                                                            |
| 17 |                  |                      |                                                                            |
| 18 |                  |                      |                                                                            |
| 19 | Descriptive data | <a href="#">#14b</a> | Indicate number of participants with missing data for each variable of     |
| 20 |                  |                      | interest                                                                   |
| 21 |                  |                      |                                                                            |
| 22 |                  |                      |                                                                            |
| 23 | n/a              |                      |                                                                            |
| 24 |                  |                      |                                                                            |
| 25 | Descriptive data | <a href="#">#14c</a> | Summarise follow-up time (eg, average and total amount)                    |
| 26 |                  |                      |                                                                            |
| 27 |                  |                      |                                                                            |
| 28 | n/a              |                      |                                                                            |
| 29 |                  |                      |                                                                            |
| 30 | Outcome data     | <a href="#">#15</a>  | Report numbers of outcome events or summary measures over time.            |
| 31 |                  |                      | Give information separately for exposed and unexposed groups if            |
| 32 |                  |                      | applicable.                                                                |
| 33 |                  |                      |                                                                            |
| 34 |                  |                      |                                                                            |
| 35 | n/a              |                      |                                                                            |
| 36 |                  |                      |                                                                            |
| 37 |                  |                      |                                                                            |
| 38 | Main results     | <a href="#">#16a</a> | Give unadjusted estimates and, if applicable, confounder-adjusted 6        |
| 39 |                  |                      | estimates and their precision (eg, 95% confidence interval). Make          |
| 40 |                  |                      | clear which confounders were adjusted for and why they were                |
| 41 |                  |                      | included                                                                   |
| 42 |                  |                      |                                                                            |
| 43 |                  |                      |                                                                            |
| 44 | Main results     | <a href="#">#16b</a> | Report category boundaries when continuous variables were  n/a             |
| 45 |                  |                      | categorized                                                                |
| 46 |                  |                      |                                                                            |
| 47 |                  |                      |                                                                            |
| 48 | Main results     | <a href="#">#16c</a> | If relevant, consider translating estimates of relative risk into absolute |
| 49 |                  |                      | risk for a meaningful time period                                          |
| 50 |                  |                      |                                                                            |
| 51 |                  |                      |                                                                            |
| 52 | n/a              |                      |                                                                            |
| 53 |                  |                      |                                                                            |
| 54 |                  |                      |                                                                            |
| 55 | Other analyses   | <a href="#">#17</a>  | Report other analyses done—eg analyses of subgroups and 7                  |
| 56 |                  |                      | interactions, and sensitivity analyses                                     |
| 57 |                  |                      |                                                                            |

## Discussion

|    |                    |                     |                                                                          |    |
|----|--------------------|---------------------|--------------------------------------------------------------------------|----|
| 1  | Key results        | <a href="#">#18</a> | Summarise key results with reference to study objectives                 | 8  |
| 2  |                    |                     |                                                                          |    |
| 3  | Limitations        | <a href="#">#19</a> | Discuss limitations of the study, taking into account sources of         | 10 |
| 4  |                    |                     | potential bias or imprecision. Discuss both direction and magnitude of   |    |
| 5  |                    |                     | any potential bias.                                                      |    |
| 6  |                    |                     |                                                                          |    |
| 7  |                    |                     |                                                                          |    |
| 8  | Interpretation     | <a href="#">#20</a> | Give a cautious overall interpretation considering objectives,           | 8  |
| 9  |                    |                     | limitations, multiplicity of analyses, results from similar studies, and |    |
| 10 |                    |                     | other relevant evidence.                                                 |    |
| 11 |                    |                     |                                                                          |    |
| 12 |                    |                     |                                                                          |    |
| 13 | Generalisability   | <a href="#">#21</a> | Discuss the generalisability (external validity) of the study results    | 9  |
| 14 |                    |                     |                                                                          |    |
| 15 |                    |                     |                                                                          |    |
| 16 | <b>Other</b>       |                     |                                                                          |    |
| 17 | <b>Information</b> |                     |                                                                          |    |
| 18 |                    |                     |                                                                          |    |
| 19 |                    |                     |                                                                          |    |
| 20 | Funding            | <a href="#">#22</a> | Give the source of funding and the role of the funders for the present   | 11 |
| 21 |                    |                     | study and, if applicable, for the original study on which the present    |    |
| 22 |                    |                     | article is based                                                         |    |
| 23 |                    |                     |                                                                          |    |
| 24 |                    |                     |                                                                          |    |

The STROBE checklist is distributed under the terms of the Creative Commons Attribution License CC-BY. This checklist was completed on 11. February 2023 using <https://www.goodreports.org/>, a tool made by the [EQUATOR Network](#) in collaboration with [Penelope.ai](#)

# BMJ Open

## An age-period-cohort analysis and projection of cancer mortality in Hong Kong, 1998–2030

|                                 |                                                                                                                                                                                                                                                                                                                                                                                                                                                                                         |
|---------------------------------|-----------------------------------------------------------------------------------------------------------------------------------------------------------------------------------------------------------------------------------------------------------------------------------------------------------------------------------------------------------------------------------------------------------------------------------------------------------------------------------------|
| Journal:                        | <i>BMJ Open</i>                                                                                                                                                                                                                                                                                                                                                                                                                                                                         |
| Manuscript ID                   | bmjopen-2023-072751.R3                                                                                                                                                                                                                                                                                                                                                                                                                                                                  |
| Article Type:                   | Original research                                                                                                                                                                                                                                                                                                                                                                                                                                                                       |
| Date Submitted by the Author:   | 30-Aug-2023                                                                                                                                                                                                                                                                                                                                                                                                                                                                             |
| Complete List of Authors:       | Zhao, Yanji; The Hong Kong Polytechnic University, Department of Applied Mathematics<br>Zhuang, Zian; The Hong Kong Polytechnic University, Department of Applied Mathematics; University of California Los Angeles, Department of Biostatistics<br>Yang, Lin; The Hong Kong Polytechnic University, School of Nursing<br>He, Daihai; The Hong Kong Polytechnic University, Department of Applied Mathematics; The Hong Kong Polytechnic University, Research Institute for Future Food |
| <b>Primary Subject Heading</b>: | Research methods                                                                                                                                                                                                                                                                                                                                                                                                                                                                        |
| Secondary Subject Heading:      | Public health, Oncology                                                                                                                                                                                                                                                                                                                                                                                                                                                                 |
| Keywords:                       | STATISTICS & RESEARCH METHODS, ONCOLOGY, Risk Factors                                                                                                                                                                                                                                                                                                                                                                                                                                   |
|                                 |                                                                                                                                                                                                                                                                                                                                                                                                                                                                                         |

SCHOLARONE™  
Manuscripts



I, the Submitting Author has the right to grant and does grant on behalf of all authors of the Work (as defined in the below author licence), an exclusive licence and/or a non-exclusive licence for contributions from authors who are: i) UK Crown employees; ii) where BMJ has agreed a CC-BY licence shall apply, and/or iii) in accordance with the terms applicable for US Federal Government officers or employees acting as part of their official duties; on a worldwide, perpetual, irrevocable, royalty-free basis to BMJ Publishing Group Ltd ("BMJ") its licensees and where the relevant Journal is co-owned by BMJ to the co-owners of the Journal, to publish the Work in this journal and any other BMJ products and to exploit all rights, as set out in our [licence](#).

The Submitting Author accepts and understands that any supply made under these terms is made by BMJ to the Submitting Author unless you are acting as an employee on behalf of your employer or a postgraduate student of an affiliated institution which is paying any applicable article publishing charge ("APC") for Open Access articles. Where the Submitting Author wishes to make the Work available on an Open Access basis (and intends to pay the relevant APC), the terms of reuse of such Open Access shall be governed by a Creative Commons licence – details of these licences and which [Creative Commons](#) licence will apply to this Work are set out in our licence referred to above.

Other than as permitted in any relevant BMJ Author's Self Archiving Policies, I confirm this Work has not been accepted for publication elsewhere, is not being considered for publication elsewhere and does not duplicate material already published. I confirm all authors consent to publication of this Work and authorise the granting of this licence.

# An age-period-cohort analysis and projection of cancer mortality in Hong Kong, 1998–2030

Yanji Zhao<sup>1, #</sup>, Zian Zhuang<sup>1,2, #</sup>, Lin Yang<sup>3</sup> and Daihai He<sup>1,4\*</sup>

1 Department of Applied Mathematics, Hong Kong Polytechnic University, Hong Kong, China

2 Department of Biostatistics, University of California, Los Angeles, CA, United States

3 School of Nursing, Hong Kong Polytechnic University, Hong Kong, China

4 Research Institute for Future Food, Hong Kong Polytechnic University, Hong Kong, China

# These authors contributed equally to this work.

\* To whom correspondence should be addressed:

Department of Applied Mathematics, The Hong Kong Polytechnic University, Hong Kong, China

Tel: 852-27667864; [daihai.he@polyu.edu.hk](mailto:daihai.he@polyu.edu.hk) (DH).

## Email of all authors

Yanji Zhao: [yan-ji.zhao@connect.polyu.hk](mailto:yan-ji.zhao@connect.polyu.hk); Zian Zhuang: [zianzhuang@ucla.edu](mailto:zianzhuang@ucla.edu);

Lin Yang: [l.yang@polyu.edu.hk](mailto:l.yang@polyu.edu.hk); Daihai He: [daihai.he@polyu.edu.hk](mailto:daihai.he@polyu.edu.hk).

*Word count: 3379*

## 24 Abstract

25 **Objectives:** To explore the relationship between immigration groups and cancer mortality, this  
26 study aimed to explore age, period, birth cohort effects and effects across genders and  
27 immigration groups on mortality rates of lung, pancreatic, colon, liver, prostate and stomach  
28 cancers and their projections.

30 **Design, Setting, and Participants:** Death registry data in Hong Kong between 1998 and 2021,  
31 which were stratified by age, sex and immigration status. Immigration status was classified into  
32 three groups: locals born in Hong Kong, long-stay immigrants and short-stay immigrants.

34 **Methods:** Age-period-cohort analysis was used to examine age, period, and birth cohort effects  
35 for genders and immigration groups from 1998 to 2021. Bayesian age-period-cohort models  
36 were applied to predict the mortality rates from 2022 to 2030.

38 **Results:** Short-stay immigrants revealed pronounced fluctuations of mortality rates by age and  
39 of relative risks by cohort and period effects for six types of cancers than those of long-stay  
40 immigrants and locals. Immigrants for each type of cancer and gender will be at a higher  
41 mortality risk than locals, as men will be at a higher risk of mortality from cancers than women  
42 in the future (excluding prostate cancer). After 2021, decreasing trends ( $p < 0.05$ ) or plateau  
43 ( $p > 0.05$ ) of forecasting mortality rates of cancers occur for all immigration groups, except for  
44 increasing trends for short-stay male immigrants with colon cancer ( $p < 0.05$ , Avg +0.30  
45 deaths/100,000 per annum from 15.47 to 18.50 deaths/100,000) and long-stay male immigrants  
46 with pancreatic cancer ( $p < 0.05$ , Avg +0.72 deaths/100,000 per annum from 16.30 to 23.49  
47 deaths/100,000).

49 **Conclusions:** Findings underscore the effect of gender and immigration status in Hong Kong  
50 on mortality risks of cancers that immigrants for each type of cancer and gender will be at a  
51 higher mortality risk than locals.

53 **Keywords:** Age-period-cohort analysis, immigration, mortality, lung cancer, pancreatic cancer,  
54 colon cancer, liver cancer, prostate cancer, stomach cancer

1  
2  
3  
4  
5  
6  
7  
8  
9  
10  
11  
12  
13  
14  
15  
16  
17  
18  
19  
20  
21  
22  
23  
24  
25  
26  
27  
28  
29  
30  
31  
32  
33  
34  
35  
36  
37  
38  
39  
40  
41  
42  
43  
44  
45  
46  
47  
48  
49  
50  
51  
52  
53  
54  
55  
56  
57  
58  
59  
60  
61  
62

## 55 **Strengths and limitations of this study**

56

57 • This study provides new evidence regarding the relationship between immigration status  
58 and cancer mortality, given the effects of age, period, birth cohort and their predictions.

59

60 • The non-identifiability problem has not been interpreted in APC models

61

62 • The future perspective of cancer therapies and techniques have not been considered.

For peer review only

## 64 Introduction

65 Several migration waves from mainland China to Hong Kong have occurred over the past  
66 century. These migration waves included a large-scale migration inflow from 1945 to 1950 (the  
67 Chinese Civil War) and a few small-scale inflows in the 1950s, 1970s, and 1990s [1-3]. In 2016,  
68 immigrants from mainland China formed approximately 38% of the population of Hong Kong.  
69 These inflows have led to a growing interest in research on the disparity of health conditions  
70 between the locals and immigrants.

71  
72 Cancer has been one of the most common causes of death, as an estimated 19.3 million new  
73 cancer cases and 9.9 million new cancer-associated deaths occurred worldwide in 2020 [4]. In  
74 Hong Kong, lung cancer is one of the most common causes of cancer deaths [5, 6]. Previous  
75 studies suggested that the primary cause of lung cancer is cigarette smoking [7-11]. Genetic  
76 factors, asbestos, radon gas, second-hand smoke, and other forms of air pollution have been  
77 proven to influence the risk of lung cancer [12-18]. The overall daily smoking rate in mainland  
78 China was approximately 23.2% in 2018 [19], whereas the daily smoking rate in Hong Kong  
79 was only 10.2% in 2019 [20]. The leading causes of liver cancer include viral infection,  
80 drinking of alcohol and polluted water and food supplies which are also culprits for colon,  
81 stomach and pancreatic cancer [21]. Alcohol consumption per capita in Hong Kong has reached  
82 2.37 liters in 2021 [22], compared to 7.0 liters of per capita consumption of alcohol in mainland  
83 China in 2018 [23]. As approximately 99% of prostate cancer cases occur after age 50, factors  
84 of prostate cancer have been regarded as old age, race, family history and the diet of red meat  
85 consumption [24]. In addition to these risk factors, studies have suggested that cancer mortality  
86 rates vary depending on migrant status [25-28]. According to data from the Census and  
87 Statistics Department of Hong Kong, approximately 81% of immigrants in Hong Kong  
88 immigrated from mainland China, Macau, and Taiwan. Immigrants from mainland China  
89 account for the bulk of this population. Previous studies have shown that child immigrants in  
90 Hong Kong tend to suffer from a higher risk of wheezing disorders and cardiovascular diseases,  
91 and immigrant women have higher age-specific mortality rates of breast cancer than locally-  
92 born women in Hong Kong [29, 30]. However, to date, few studies have investigated the effect  
93 of length of stay in Hong Kong and birthplace on the risk of other types of cancer.

94  
95 In this study, we compared the mortality rates of lung, pancreatic, colon, liver, prostate and  
96 stomach cancers between locally born residents in Hong Kong and immigrants from mainland  
97 China. Both populations are widely considered as ethnically homogeneous with similar cultures.  
98 Nevertheless, due to different early life experiences, immigrants are exposed to more various  
99 social economy and lifestyles than locals. Therefore, it's constructive to ascertain whether  
100 immigrants from mainland China have a different mortality pattern of cancers from locals to



1  
2  
3  
4 101 verify the significance of migration status for this health outcome. As Age-period-cohort (APC)  
5 102 analysis plays a vital role in studying time-specific phenomena in epidemiology, in this study,  
6 103 to evaluate the effect of immigration on cancer mortality in the past and future, we developed  
7 104 APC models specified by sex and migrant status to assess the effects of age, period, birth cohort,  
8 105 and of the length of stay in Hong Kong on the mortality risks of cancers. Additionally, we  
9 106 explore the projection of mortality rates for the locally born population and immigrants in Hong  
10 107 Kong who were younger or older than 60 using a predictive model, taking into account age,  
11 108 period, and birth cohort effects as well.  
12  
13  
14  
15  
16  
17

## 18 110 **Methods**

### 19 111 *Data*

20 112 We obtained the death registry data in Hong Kong between 1998 and 2021 from the Census  
21 113 and Statistics Department of Hong Kong, as the data in 2022 has not been available up to now.  
22 114 The data was extracted from a routine census held by the Hong Kong government as subjective  
23 115 errors caused by resampling can be neglected. The population data were stratified by age, sex,  
24 116 immigration status, and length of stay in Hong Kong. We retrieved six types of cancer cases  
25 117 from the death registry data using ICD codes, such as ICD-9 code 162 and ICD-10 codes  
26 118 C34.0–C34.3, C348, and C349 for lung cancer. To assure comparability among  
27 119 registries, deaths from the age group of 35–85 years were selected, since cases younger than 35  
28 120 and older than 85 were relatively trivial for lack of statistical interpretability [31]. Immigration  
29 121 status was classified into three groups: locals born in Hong Kong, immigrants who have lived  
30 122 in Hong Kong for >10 years before death defined as long-stay immigrants, and immigrants who  
31 123 have lived in Hong Kong for ≤10 years before death defined as short-stay immigrants. Notably,  
32 124 much focus was placed on immigrants from mainland China, because approximately 81% of  
33 125 immigrants in Hong Kong came from mainland China, Macau, and Taiwan based on the data  
34 126 from the Census and Statistics Department of Hong Kong. Moreover, few cases recorded from  
35 127 Macau and Taiwan are statistically insignificant in the analysis. Demographics and population  
36 128 projections from 2022 to 2030 were retrieved from the Census and Statistics Department of  
37 129 Hong Kong and estimated with cubic smoothing spline as the prerequisite of the predictive  
38 130 model. Codes for APC and BAPC analysis are available in the GitHub repository  
39 131 (<https://github.com/kshz2164313/APC-population-projections-for-immigration-HK>).  
40  
41  
42  
43  
44  
45  
46  
47  
48  
49  
50  
51  
52  
53

### 54 134 *Statistical analysis*

55 135 We modeled cancer mortality rates in Hong Kong using APC analysis based on log-linear  
56 136 Poisson regression models. The model aimed to disentangle age, period, and cohort effects of  
57 137 time-varying phenomena simultaneously [32, 33], given that  
58  
59  
60

$$\log(E_{ij}) = \alpha_i + \beta_j + \gamma_k + \mu + \log(\theta_{ij}) \quad (1)$$

where  $E_{ij}$  denotes expected mortality;  $\alpha_i$ ,  $\beta_j$ , and  $\gamma_k$  denote age, period, and cohort effect, respectively, for  $i = 1, \dots, I$ ,  $j = 1, \dots, J$ ,  $k = 1, \dots, K$  with  $k = I - i + j$ .  $\log(\theta_{ij})$  is the offset. We mainly focused on the contributions of sex and immigration status due to the non-identifiability problem that the effects of these three components are collinear with each other (denoted as period – age = cohort) [34]. Birth cohort effect and period effect were assessed with relative risks to evaluate the effect of three components. The median year of birth among cases was regarded as the reference cohort [35,36]. Since death cases aged at 35–85 years between 1998 and 2021 were selected, the range of birth cohort from 1913 to 1986 covered observations and further projections until 2030. The second and penultimate period effects were constrained to the reference for period. For sex and immigration status, maximum likelihood framework was applied to estimate the relative risks and 95% confidence intervals (CIs) by age groups, calendar period, and birth cohort.

Several projection approaches for future cancer mortality have been developed, but a Bayesian age-period-cohort (BAPC) model built upon integrated nested Laplace approximations (INLA) [37] yields relatively higher coverage and better performance for all evaluated parameter combinations [38]. To prevent some sampling problems caused by Markov chain Monte Carlo (MCMC), this MCMC-free BAPC approach was applied to predict future cancer mortality within a fully Bayesian inference setting and provide outputs of interest simply, such as projected age-standardized and age-specific rates. Convergence checks are not necessary for this technique [37]. The projections of age-standardized cancer mortality rates for each sex, age group (younger or older than 60 years) and migrant status, taking into account age, period, and birth cohort effects, were performed based on the weights of population age groups from the WHO World Standard population [39], with 95% prediction intervals. Mann-Kendall trend test was applied to verify the projection trend. Friedman's Two-Way Analysis of Variance was applied to test interactions between gender and immigration groups for each year.

All analyses were performed via R version 4.2.1 (R Core Team, R Foundation for Statistical Computing, Vienna, Austria, 2013, <http://www.R-project.org/>). The APC models were established using the Epi package, and the projections based on Bayesian APC models were performed with the BAPC package.

### Patient and Public Involvement

None.

## Results

Figure 1 & 2 and eFigure 1(a-e) in **Supplementary Material** illustrate the estimates of age

1  
2  
3  
4 178 (assessed by cancer mortality), cohort and period effects (assessed by relative risk) based on  
5 179 APC models among three migrant groups for men and women with six types of cancers,  
6 180 respectively. All the mortality rates for each gender and immigration status exhibit notable  
7  
8 181 increasing trends with age. Age, cohort and period effects of six types of cancer for immigrants  
9 182 who stayed in Hong Kong for  $\leq 10$  years revealed relatively more pronounced fluctuations and  
10 183 deviations from those effects in the other two immigration groups. Significant increasing trends  
11 184 of age effect occurred in all types of cancer, regardless of gender and immigration status. For  
12 185 example, while relatively insignificant differences in lung cancer mortality rates by  
13 186 immigration status among females have performed, male immigrants who remained in Hong  
14 187 Kong for  $> 10$  years had higher lung cancer mortality rates at ages above 50 years and those  
15 188 who arrived  $\leq 10$  years had lower lung cancer mortality at ages below 62 years compared to  
16 189 local men Figure 1. In addition to compatible dynamics of period effect for locals and long-stay  
17 190 immigrants, similar changes of relative risks by birth cohort for locals and long-stay immigrants  
18 191 in lung, colon, liver and stomach cancers occurred before 1945, whereas significant differences  
19 192 of relative risks by birth cohort between these two immigration groups occurred after 1960  
20 193 (Figure 1 & eFigure 1(a,b,d)). Locals and long-stay immigrants in pancreatic and prostate  
21 194 cancer perform almost similar changes of relative risks by birth cohort effects all the time  
22 195 (eFigure 1(c,e)). Short-stay immigrants who have stayed in Hong Kong for  $\leq 10$  years had more  
23 196 fluctuating relative risks affected by period effects before 2020 than those for locals and long-  
24 197 stay immigrants. Lack of young cases, especially young short-stay immigrants, of prostate  
25 198 cancer leads to significant deviations and variances in age and cohort effects.

26  
27  
28  
29  
30  
31  
32  
33  
34  
35  
36 200 Figure 3-5, eFigure 2-6 in **Supplementary Material** illustrate the age-standardized mortality  
37 201 rates of six types of cancer from 1998 to 2021 and their projections by sex, immigrant status  
38 202 and age groups from 2022 to 2030, taking into account age, period, and birth cohort effects.  
39 203 Means and standard deviations of predictive mortality rates are shown in eTable 1-6 in  
40 204 **Supplementary Material**. For all ages projection (Figure 2 & eFigure 2-6), as men will be at  
41 205 higher risk of mortality rates of cancers (excluding prostate cancer) than women in the future  
42 206 for all three age groups (all ages, young and older than 60 years) and approximately significant  
43 207 interactions between gender and immigration groups emerge for each type of cancer in each  
44 208 year ( $p < 0.05$ ), given the projected trends, immigrants for each gender, especially who have  
45 209 stayed in Hong Kong for  $> 10$  years will suffer from higher mortality rates of cancer in each  
46 210 year than locals. Monotone decreasing trends or plateau of forecasting occur for both genders  
47 211 and all immigration groups in cancers, except for increasing trends for male immigrants who  
48 212 have stayed in Hong Kong for  $\leq 10$  years with colon cancer ( $p < 0.05$ , Avg +0.30 deaths/100,000  
49 213 per annum) from 15.47 deaths/100,000 (95% CI: 11.28, 19.66) in 2021 to 18.50 deaths/100,000  
50 214 (95% CI: 2.31, 34.69) in 2030, and male immigrants who have stayed in Hong Kong for  $> 10$   
51 215 years with pancreatic cancer ( $p < 0.05$ , Avg +0.72 deaths/100,000 per annum) from 16.30

1  
2  
3 216 deaths/100,000 (95% CI: 14.38,17.26) in 2021 to 23.49 deaths/100,000 (95% CI: 12.49, 34.49)  
4  
5 217 in 2030. Most of predictive trends for younger cases (<60 years) and older cases ( $\geq$ 60 years)  
6  
7 218 reach a consensus with those for all ages population, except for two phenomena: 1.) mortality  
8 219 rates of lung cancer for men immigrants  $\leq$ 10 that insignificant trend for all ages ( $p > 0.05$ ) vs.  
9 220 decline for younger cases ( $p < 0.05$ ) vs. increase for older cases ( $p < 0.05$ ); 2.) mortality rates  
10 221 of liver cancer for men immigrants  $>10$  that decline for all ages ( $p < 0.05$ ) vs. decline for  
11 222 younger cases ( $p < 0.05$ ) vs. insignificant trend for older cases ( $p > 0.05$ ). Some particular cases  
12 223 occur in the projection of prostate cancer that young long-stay male immigrants (0.44  
13 224 deaths/100,000, 95% CI: 0, 1.05) aged less than 60 will be at lower mortality rate than locals  
14 225 (0.69 deaths/100,000, 95% CI: 0, 1.42) in 2030 (eTable 6). Compared with other cancers and  
15 226 immigration groups, male immigrants who have stayed in Hong Kong for  $>10$  years with lung  
16 227 cancer would perform the most significant decline in predictive mean from 102.90 (95% CI:  
17 228 98.14, 107.66) to 79.55 (95% CI: 47.46, 111.64) deaths per 100,000 population (Avg -2.34  
18 229 deaths/100,000 per annum) (eTable 1), while the same immigration group with pancreatic  
19 230 cancer would indicate the most significant uptrend in each year of 16.30 (95% CI: 14.38,17.26)  
20 231 and 23.49 (95% CI: 12.49, 34.49) deaths per 100,000 population in 2021 and 2030, respectively  
21 232 (Avg +0.72 deaths/100,000 per annum) (eTable 4).

22 233  
23 234  
24 235

## 236 Discussion

237 Early detection of cancer is positive and instructive for increasing chances of cure. Nevertheless,  
238 238 the high mortality rate of cancer results from late diagnosis among most patients after  
239 239 progression to more advanced or severe stages. Individuals at high risk of cancer, such as  
240 240 smokers, alcoholics or those who are frequently exposed to susceptible circumstances, should  
241 241 be screened for early detections to increase opportunities for cure [40]. Therefore, the  
242 242 differences in mortality rates among immigration groups are synonymous with detection means,  
243 243 therapies, and social history in disparate periods and areas.

244

245 While the changes in mortality rates by age for long-stay immigrants reached approximate  
246 246 harmony with those for locals, the changes in mortality rates by age for short-stay immigrants  
247 247 revealed clear differences with those for the other two populations. The group of long-stay  
248 248 immigrants had a higher risk of death from lung, colon and liver cancers than the other two  
249 249 immigration groups after the age of 60 years. Short-stay male immigrants were less likely to  
250 250 die from lung cancer before the age of 65 years. The contrast in age effects among the  
251 251 immigration groups was partially consistent with studies [25, 41] that highlighted the age  
252 252 effects for locals and immigrants on breast cancer mortality in Hong Kong and lung cancer

1  
2  
3 253 incidence in Sweden, as they both showed similar trends and magnitudes between locals and  
4 254 immigrants before the age of 60 years. They are also compatible with the results in [42] that  
5 255 diagnosis of liver cancer is the most frequent among populations at 55 to 65 years old.  
6  
7 256 According to these trends, young individuals, especially new young immigrant men, who  
8  
9 257 have benefited from all-rounded development in mainland China and Hong Kong, are more  
10  
11 258 likely to seek early detection and be treated for cancers using more advanced treatments [43].  
12  
13 259 Differences in birth cohort effects among immigrant groups partially comply with the  
14  
15 260 interpretation above.

16  
17 261  
18 262 We observed significant trends of cohort effects among locals and immigrants. These findings  
19  
20 263 are partially consistent but subtly different from previous findings, regarding the effect of  
21  
22 264 immigration status on cancers. Zhao et al. [25] described multiple peaks of cohort effects on  
23  
24 265 breast cancer mortality between locals and immigrants in Hong Kong, as well as a significant  
25  
26 266 decline in cohort effects after 1950. In contrast, Sung et al. [44] investigated the difference in  
27  
28 267 breast cancer incidence between Chinese Americans and non-Hispanic whites in the U.S. and  
29  
30 268 emphasized that Chinese Americans were at lower risk of breast cancer than non-Hispanic  
31  
32 269 whites born in the same year. Here, we interpret the cohort-driven trends resulting from the  
33  
34 270 intricacy of social history and lifestyle. Compared to a relatively stable social development in  
35  
36 271 Hong Kong, representing downward trends of relative risks for locals, wars and social  
37  
38 272 instability in mainland China resulted in several immigration waves from mainland China to  
39  
40 273 Hong Kong before 1950. Additionally, remarkable increasing trends were recorded for new  
41  
42 274 immigrants after 1950, which corresponded to the economic downturn after wars and famine  
43  
44 275 between 1959 and 1961 during their youth [45]. The increasing trends for new immigrants  
45  
46 276 and similar trends for locals and long-stay immigrants were consistent with the finding that  
47  
48 277 nutrient deficiency contributes to a higher risk of severe mortality rates of cancers [46].  
49  
50 278 Furthermore, we speculate that these trends, especially those for locals and long-stay  
51  
52 279 immigrants, are most likely attributed to social development and personal behaviors, such as  
53  
54 280 daily habits, occupational history, different diagnoses and treatments, and domestic  
55  
56 281 environmental exposures. Notably, short-stay immigrants suffered from a lower risk of death  
57  
58 282 from colon cancer for all ages (eFigure 1a in **Supplementary Material**). As locals and  
59  
60 283 immigrants in Hong Kong transitioned to more westernized lifestyles, higher consumption of  
284  
285 meat was associated with a higher risk of these types of cancer, whereas consumption of  
286  
287 vegetables had a strong protective effect against pancreatic cancer, and moderate  
288  
289 consumption of coffee appeared to be beneficial against lung cancer [47,48]. Further studies  
290  
on potential risk factors are required.

289 Short-stay immigrants had more fluctuating and non-stationary but inconspicuous relative  
290 risks by period effects before 2021 than locals and long-stay immigrants. Cumulatively, an



1  
2  
3  
4 291 arch pattern and fluctuating curve depicting period effects externally resulted in an arch  
5 292 pattern of age-standardized mortality rates for short-stay immigrant women and irregular rates  
6 293 for short-stay immigrant men before 2021. The external performance of different period  
7 294 effects on mortality rates could be most likely attributed to the higher effect of different  
8 295 lifestyles and social development on new immigrants than on long-stay immigrants and locals  
9 296 in Hong Kong. For the age-standardized mortality rates and projections, consistent with  
10 297 previous findings [49,50], we predict that the mortality rates of cancer in Hong Kong after  
11 298 2021 will continue to decline or remain relatively stable, consistent with the trends before  
12 299 2020, except for male immigrants who have stayed in Hong Kong for  $\leq 10$  years with colon  
13 300 cancer and male immigrants who have stayed in Hong Kong for  $>10$  years with pancreatic  
14 301 cancer. Men will be at higher risk of mortality rates of cancer than women, regardless of  
15 302 immigration status. They are also compatible with the results in [4] that men suffer from a  
16 303 higher risk of these types of cancer than women, excluding prostate cancer. Furthermore, new  
17 304 immigrant women will be at lower risk than local women, even though long-stay immigrants  
18 305 will suffer from higher mortality rates than locals in the future. Potential interpretations could  
19 306 be consistent with those for birth cohort effects, as age and period effects are considered as  
20 307 confounders of cohort effect.  
21  
22  
23  
24  
25  
26  
27  
28  
29  
30  
31  
32  
33  
34  
35  
36  
37  
38  
39  
40  
41  
42  
43  
44  
45  
46  
47  
48  
49  
50  
51  
52  
53  
54  
55  
56  
57  
58  
59  
60

308  
309 In the past few decades, spurred by an increasing burden of high incidence and mortality rates  
310 of cancer, several studies focused on the inherent identification dilemma of three effects in the  
311 APC model. Further, complicated population distribution and immigration status in Hong  
312 Kong, one of the areas with the highest population density and migration frequency in the  
313 world, have intricate causes and inherent dynamics of cancer and other diseases. To our  
314 knowledge, few studies have assessed the relationship between immigration status and cancer  
315 mortality. Therefore, this study is original to examine the effect of the length of stay in Hong  
316 Kong and origins of previous residence on cancer deaths, which is instructive for further  
317 immigration policy-making and targeted strategies of disease detection and intervention.  
318 However, this study had several limitations. Given the non-identifiability problem in age-  
319 period-cohort models, we could only depict trends and variations among different  
320 immigration and sex groups, as illustrated in figures, and insufficiently perform the estimates  
321 of the contributions of three effects or subgroups to mortality rates. Furthermore, we adopted  
322 a cubic smoothing spline to estimate populations of immigrants and locals due to the large  
323 proportion of unspecified immigration status from official demographic projections. A few  
324 acceptable cases resulted in a limited type of cancer so that some common cancers, such as  
325 the ovary and cervix, were discarded. Since the issue of quantification, the future perspective  
326 of cancer therapies and techniques have not been considered in the model of projection.

1  
2  
3  
4 **329 Conclusion**

5  
6 330 We conclude that immigrants, especially short-stay immigrants, had more pronounced  
7 331 fluctuations of mortality rates by age and of relative risks by cohort and period effects for six  
8 332 types of cancers than those of long-stay immigrants and locals. Men will be at a higher risk of  
9 333 mortality rates of six types of cancer than women in the future. Male immigrants who have  
10 334 stayed in Hong Kong for  $\leq 10$  years with colon cancer and male immigrants who have stayed  
11 335 in Hong Kong for  $> 10$  years with pancreatic cancer would perform significant uptrend in the  
12 336 future, while other immigration groups for each type of cancer would continue to decline or  
13 337 remain relatively stable. Immigrants for each gender in Hong Kong would suffer from higher  
14 338 mortality risks of cancers than locals in the future.  
15  
16  
17  
18  
19  
20  
21  
22  
23  
24  
25  
26  
27  
28  
29  
30  
31  
32  
33  
34  
35  
36  
37  
38  
39  
40  
41  
42  
43  
44  
45  
46  
47  
48  
49  
50  
51  
52  
53  
54  
55  
56  
57  
58  
59  
60

1  
2  
3  
4 339 **Declaration**

5  
6 340 **Ethical approval and consent to participate**

7  
8 341 Ethical approval and consent to participate are not applicable. This study does not involve  
9  
10 342 human participants. Data was obtained from the Census and Statistics Department of Hong  
11  
12 343 Kong.

13  
14 344 **Consent for publication**

15  
16 345 Not applicable.

17  
18  
19 346 **Data Availability Statement**

20  
21 347 Data are available upon reasonable request.

22  
23 348 **Author contributions**

24 349 **Yanji Zhao:** Methodology, Formal analysis, Data Curation, Writing - Original Draft,  
25 350 Visualization

26  
27 351 **Zian Zhuang:** Methodology, Formal analysis, Data Curation, Writing - Review & Editing

28 352 **Lin Yang:** Validation, Writing - Review & Editing

29 353 **Daihai He:** Conceptualization, Writing - Review & Editing, Supervision

30  
31 354

32  
33 355 **Funding**

34  
35 356 The work described in this paper was partially supported by a grant from the Research Grants  
36  
37 357 Council of the Hong Kong Special Administrative Region, China (HKU C7123-20G).

38  
39 358 **Conflict of interest**

40  
41 359 None declared.

42  
43 360 **Acknowledgements**

44  
45 361 None.

46  
47 362  
48  
49  
50  
51  
52  
53  
54  
55  
56  
57  
58  
59  
60



## 364 References

- 365
- 366 1. Fan S-C. The population projection of Hong Kong. *Southeast Asian Journal of Social Science*.  
367 1974;2(1/2):105-17.
- 368 2. Department CaS. Hong Kong Statistics 1947-1967 (Report).  
369 [https://www.statistics.gov.hk/pub/hist/1961\\_1970/B10100031967AN67E0100.pdf](https://www.statistics.gov.hk/pub/hist/1961_1970/B10100031967AN67E0100.pdf),  
370 Accessed 4th May 2019.
- 371 3. Department CaS. Demographic Trends in Hong Kong 1981-2011 (Report).  
372 <http://www.statistics.gov.hk/pub/B1120017032012XXXXB0100.pdf>, Accessed 4th May 2019.
- 373 4. Sung H, Ferlay J, Siegel RL, Laversanne M, Soerjomataram I, Jemal A, et al. Global Cancer  
374 Statistics 2020: GLOBOCAN Estimates of Incidence and Mortality Worldwide for 36 Cancers  
375 in 185 Countries. *CA: A Cancer Journal for Clinicians*. 2021 2021/05/01;71(3):209-49. doi:  
376 <https://doi.org/10.3322/caac.21660>.
- 377 5. Wang XR, Chiu YL, Qiu H, Au JSK, Yu ITS. The roles of smoking and cooking emissions  
378 in lung cancer risk among Chinese women in Hong Kong. *Annals of Oncology*. 2009  
379 2009/04/01;20(4):746-51. doi: <https://doi.org/10.1093/annonc/mdn699>.
- 380 6. Chiu Y-L, Wang X-R, Qiu H, Yu IT-S. Risk factors for lung cancer: a case-control study in  
381 Hong Kong women. *Cancer Causes & Control*. 2010 2010/05/01;21(5):777-85. doi:  
382 10.1007/s10552-010-9506-9.
- 383 7. Office on S, Health. Publications and Reports of the Surgeon General. Women and  
384 Smoking: A Report of the Surgeon General. Atlanta (GA): Centers for Disease Control and  
385 Prevention (US); 2001.
- 386 8. Escobedo LG, Peddicord JP. Smoking prevalence in US birth cohorts: the influence of gender  
387 and education. *American Journal of Public Health*. 1996 1996/02/01;86(2):231-6. doi:  
388 10.2105/AJPH.86.2.231.
- 389 9. Husten CG, Shelton DM, Chrismon JH, Lin YC, Mowery P, Powell FA. Cigarette smoking  
390 and smoking cessation among older adults: United States, 1965-94. *Tobacco Control*.  
391 1997;6(3):175. doi: 10.1136/tc.6.3.175.
- 392 10. Bolego C, Poli A, Paoletti R. Smoking and gender. *Cardiovascular Research*.  
393 2002;53(3):568-76. doi: 10.1016/S0008-6363(01)00520-X.
- 394 11. Doll R, Hill AB. The mortality of doctors in relation to their smoking habits; a preliminary  
395 report. *Br Med J*. 1954;1(4877):1451-5. PMID: 13160495. doi: 10.1136/bmj.1.4877.1451.
- 396 12. Ramada Rodilla JM, Calvo Cerrada B, Serra Pujadas C, Delclos GL, Benavides FG. Fiber  
397 burden and asbestos-related diseases: an umbrella review. *Gaceta Sanitaria*. 2021 2021/06/11/.  
398 doi: <https://doi.org/10.1016/j.gaceta.2021.04.001>.
- 399 13. Collishaw NE, Kirkbride J, Wigle DT. Tobacco smoke in the workplace: an occupational  
400 health hazard. *Can Med Assoc J*. 1984;131(10):1199-204. PMID: 6498670.
- 401 14. Dresler CM, Fratelli C, Babb J, Everley L, Evans AA, Clapper ML. Gender differences in  
402 genetic susceptibility for lung cancer. *Lung Cancer*. 2000 2000/12/01;30(3):153-60. doi:  
403 [https://doi.org/10.1016/S0169-5002\(00\)00163-X](https://doi.org/10.1016/S0169-5002(00)00163-X).
- 404 15. Alexandrov K, Cascorbi I, Rojas M, Bouvier G, Kriek E, Bartsch H. CYP1A1 and GSTM1  
405 genotypes affect benzo[ a ]pyrene DNA adducts in smokers' lung: comparison with  
406 aromatic/hydrophobic adduct formation. *Carcinogenesis*. 2002;23(12):1969-77. doi:

- 1  
2  
3 407 10.1093/carcin/23.12.1969.
- 4 408 16. Samet JM. Radon and Lung Cancer. JNCI: Journal of the National Cancer Institute.  
5 409 1989;81(10):745-58. doi: 10.1093/jnci/81.10.745.
- 6 410 17. Darby S, Hill D, Auvinen A, Barros-Dios JM, Baysson H, Bochicchio F, et al. Radon in  
7 411 homes and risk of lung cancer: collaborative analysis of individual data from 13 European case-  
8 412 control studies. BMJ. 2005;330(7485):223. doi: 10.1136/bmj.38308.477650.63.
- 9 413 18. Raaschou-Nielsen O, Andersen ZJ, Beelen R, Samoli E, Stafoggia M, Weinmayr G, et al.  
10 414 Air pollution and lung cancer incidence in 17 European cohorts: prospective analyses from the  
11 415 European Study of Cohorts for Air Pollution Effects (ESCAPE). The Lancet Oncology. 2013  
12 416 2013/08/01/;14(9):813-22. doi: [https://doi.org/10.1016/S1470-2045\(13\)70279-1](https://doi.org/10.1016/S1470-2045(13)70279-1).
- 13 417 19. 2018 Summary-20190719. Retrieved August 26, 2022, from  
14 418 [https://www.who.int/docs/default-source/wpro---documents/countries/china/2018-gats-china-](https://www.who.int/docs/default-source/wpro---documents/countries/china/2018-gats-china-factsheet-cn-en.pdf?sfvrsn=3f4e2da9_2)  
15 419 [factsheet-cn-en.pdf?sfvrsn=3f4e2da9\\_2](https://www.who.int/docs/default-source/wpro---documents/countries/china/2018-gats-china-factsheet-cn-en.pdf?sfvrsn=3f4e2da9_2)
- 16 420 20. *Thematic household survey*. Retrieved August 26, 2022, from  
17 421 [https://www.censtatd.gov.hk/en/data/stat\\_report/product/B1130201/att/B11302702020XXXX](https://www.censtatd.gov.hk/en/data/stat_report/product/B1130201/att/B11302702020XXXX)  
18 422 [B0100.pdf](https://www.censtatd.gov.hk/en/data/stat_report/product/B1130201/att/B11302702020XXXX)
- 19 423 21. Abubakar II, Tillmann T, Banerjee A. Global, regional, and national age-sex specific all-  
20 424 cause and cause-specific mortality for 240 causes of death, 1990-2013: a systematic analysis  
21 425 for the Global Burden of Disease Study 2013. Lancet. 2015 Jan 10;385(9963):117-71.
- 22 426 22. Estimated alcohol consumption per capita in Hong Kong. Change4Health. (n.d.).  
23 427 Retrieved December 1, 2022, from  
24 428 [https://www.change4health.gov.hk/en/alcohol\\_aware/figures/alcohol\\_consumption/index.htm](https://www.change4health.gov.hk/en/alcohol_aware/figures/alcohol_consumption/index.htm)  
25 429 1
- 26 430 23. World Health Organization. Global status report on alcohol and health 2018. World  
27 431 Health Organization; 2019 Feb 14.
- 28 432 24. Wild C. World cancer report 2014. Wild CP, Stewart BW, editors. Geneva, Switzerland:  
29 433 World Health Organization; 2014.
- 30 434
- 31 435 25. Zhao S, Dong H, Qin J, Liu H, Li Y, Chen Y, et al. Breast cancer mortality in Chinese  
32 436 women: does migrant status play a role? Annals of Epidemiology. 2019 2019/12/01/;40:28-  
33 437 34.e2. doi: <https://doi.org/10.1016/j.annepidem.2019.10.006>.
- 34 438 26. Gomez SL, Yang J, Lin S-W, McCusker M, Sandler A, Cheng I, et al. Incidence trends of  
35 439 lung cancer by immigration status among Chinese Americans. Cancer Epidemiol Biomarkers  
36 440 Prev. 2015;24(8):1157-64. PMID: 25990553. doi: 10.1158/1055-9965.EPI-15-0123.
- 37 441 27. Hemminki K, Li X, Czene K. Cancer risks in first-generation immigrants to Sweden.  
38 442 International Journal of Cancer. 2002 2002/05/10;99(2):218-28. doi:  
39 443 <https://doi.org/10.1002/ijc.10322>.
- 40 444 28. Vanthomme K, Roskamp M, De Schutter H, Vandenneede H. Lung cancer incidence  
41 445 differences in migrant men in Belgium, 2004–2013: histology-specific analyses. BMC Cancer.  
42 446 2021 2021/03/30;21(1):328. doi: 10.1186/s12885-021-08038-6.
- 43 447 29. Schooling M, Leung GM, Janus ED, Ho SY, Hedley AJ, Lam TH. Childhood migration  
44 448 and cardiovascular risk. International Journal of Epidemiology. 2004;33(6):1219-26. doi:  
45 449 10.1093/ije/dyh221.
- 46 450 30. Leung JYY, Li AM, Leung GM, Schooling CM. Mode of delivery and childhood

- 1  
2  
3 451 hospitalizations for asthma and other wheezing disorders. *Clinical & Experimental Allergy*.  
4 452 2015 2015/06/01;45(6):1109-17. doi: <https://doi.org/10.1111/cea.12548>.  
5  
6 453 31. Baker A, Bray I. Bayesian projections: what are the effects of excluding data from younger  
7 454 age groups?. *American Journal of Epidemiology*. 2005 Oct 15;162(8):798-805.  
8  
9 455 32. Rosenberg PS, Anderson WF. Age-Period-Cohort Models in Cancer Surveillance Research:  
10 456 Ready for Prime Time? APC Models. *Cancer Epidemiology, Biomarkers & Prevention*. 2011  
11 457 Jul 1;20(7):1263-8.  
12  
13 458 33. Holford T. Analyzing the effects of age, period and cohort on incidence and mortality rates.  
14 459 *Stat Meth Med Res*. 1992;1:317-37.  
15  
16 460 34. Brookmeyer R, Stroup DF, editors. *Monitoring the health of populations: statistical*  
17 461 *principles and methods for public health surveillance*. Oxford University Press; 2004.  
18 462 35. Yang Y, Land KC. *Age-period-cohort analysis: New models, methods, and empirical*  
19 463 *applications*. Taylor & Francis; 2013.  
20 464 36. Robertson C, Gandini S, Boyle P. Age-period-cohort models: a comparative study of  
21 465 available methodologies. *Journal of clinical epidemiology*. 1999 Jun 1;52(6):569-83.  
22  
23 466 37. Riebler A, Held L. Projecting the future burden of cancer: Bayesian age-period-cohort  
24 467 analysis with integrated nested Laplace approximations. *Biometrical Journal*. 2017  
25 468 May;59(3):531-49.  
26  
27 469 38. Knoll M, Furkel J, Debus J, Abdollahi A, Karch A, Stock C. An R package for an integrated  
28 470 evaluation of statistical approaches to cancer incidence projection. *BMC medical research*  
29 471 *methodology*. 2020 Dec;20(1):1-1.  
30  
31 472 39. Ahmad OB, Boschi-Pinto C, Lopez AD, Murray CJ, Lozano R, Inoue M. Age  
32 473 standardization of rates: a new WHO standard. Geneva: World Health Organization. 2001  
33 474 Jan;9(10):1-4.  
34  
35 475 40. Sung H, Ferlay J, Siegel RL, Laversanne M, Soerjomataram I, Jemal A, Bray F. Global  
36 476 cancer statistics 2020: GLOBOCAN estimates of incidence and mortality worldwide for 36  
37 477 cancers in 185 countries. *CA: a cancer journal for clinicians*. 2021 May;71(3):209-49.  
38  
39 478 41. Mousavi SM, Fallah M, Sundquist K, Hemminki K. Age-and time-dependent changes in  
40 479 cancer incidence among immigrants to Sweden: colorectal, lung, breast and prostate cancers.  
41 480 *International journal of cancer*. 2012 Jul 15;131(2):E122-8.  
42  
43 481 42. National Cancer Institute. SEER stat fact sheets: liver and intrahepatic bile duct cancer.  
44 482 43. Wu X, Chung VC, Hui EP, Ziea ET, Ng BF, Ho RS, Tsoi KK, Wong S, Wu JC.  
45 483 Effectiveness of acupuncture and related therapies for palliative care of cancer: overview of  
46 484 systematic reviews. *Scientific reports*. 2015 Nov 26;5(1):1-5.  
47  
48 485 44. Sung H, Rosenberg PS, Chen WQ, Hartman M, Lim WY, Chia KS, Wai-Kong Mang O,  
49 486 Tse L, Anderson WF, Yang XR. The impact of breast cancer-specific birth cohort effects among  
50 487 younger and older Chinese populations. *International journal of cancer*. 2016 Aug  
51 488 1;139(3):527-34.  
52  
53 489 45. *The world economy volume 1: a millennial perspective, 2, Historical statistics*: Academic  
54 490 *Foundation, Gurgaon, India (2007)*  
55  
56 491 46. Elias SG, Peeters PH, Grobbee DE, van Noord PA. The 1944-1945 Dutch famine and  
57 492 subsequent overall cancer incidence. *Cancer Epidemiology Biomarkers & Prevention*. 2005  
58 493 Aug;14(8):1981-5.  
59  
60 494 47. Chiu YL, Wang XR, Qiu H, Yu IT. Risk factors for lung cancer: a case-control study in

- 1  
2  
3 495 Hong Kong women. *Cancer Causes & Control*. 2010 May;21(5):777-85.  
4 496 48. Li J, Lam AS, Yau ST, Yiu KK, Tsoi KK. Antihypertensive treatments and risks of lung  
5 497 Cancer: A large population-based cohort study in Hong Kong. *BMC cancer*. 2021 Dec;21(1):1-  
6 498 9.  
7  
8 499 49. Du J, Sun H, Sun Y, Du J, Cao W, Sun S. Assessment of age, period, and cohort effects of  
9 500 lung cancer incidence in Hong Kong and projection up to 2030 based on changing  
10 501 demographics. *American Journal of Cancer Research*. 2021;11(12):5902.  
11 502 50. *Centre for Health Protection, Department of Health - Lung Cancer*. Centre for Health  
12 503 Protection. Retrieved August 10, 2022, from  
13 504 <https://www.chp.gov.hk/en/healthtopics/content/25/49.html>

14  
15  
16  
17  
18  
19  
20  
21  
22  
23  
24  
25  
26  
27  
28  
29  
30  
31  
32  
33  
34  
35  
36  
37  
38  
39  
40  
41  
42  
43  
44  
45  
46  
47  
48  
49  
50  
51  
52  
53  
54  
55  
56  
57  
58  
59  
60

For peer review only

1  
2 505  
3 506  
4 507  
5 508  
6 509  
7 510  
8 511  
9  
10  
11  
12  
13  
14  
15  
16  
17  
18  
19  
20  
21  
22  
23  
24  
25  
26  
27  
28  
29  
30  
31  
32  
33  
34  
35  
36  
37  
38  
39  
40  
41  
42  
43  
44  
45  
46  
47  
48  
49  
50  
51  
52  
53  
54  
55  
56  
57  
58  
59  
60

**Figure 1.** Parameter estimates of age (a), cohort (b) and period (c) effects based on an age-period-cohort model of male lung cancer mortality rates by immigrant groups: locals, immigrants stay in Hong Kong for more than 10 years and immigrants stay in Hong Kong for less than or equal to 10 years. Age effect was assessed by mortality (left axis). Cohort and period effects were assessed by relative risk (right axis), 95% confidence intervals are shown as shaded bands.

For peer review only

1  
2 512  
3 513  
4 514  
5 515  
6 516  
7 517  
8 518  
9  
10  
11  
12  
13  
14  
15  
16  
17  
18  
19  
20  
21  
22  
23  
24  
25  
26  
27  
28  
29  
30  
31  
32  
33  
34  
35  
36  
37  
38  
39  
40  
41  
42  
43  
44  
45  
46  
47  
48  
49  
50  
51  
52  
53  
54  
55  
56  
57  
58  
59  
60

**Figure 2.** Parameter estimates of age (a), cohort (b) and period (c) effects based on an age-period-cohort model of female lung cancer mortality rates by immigrant groups: locals, immigrants stay in Hong Kong for more than 10 years and immigrants stay in Hong Kong for less than or equal to 10 years. Age effect was assessed by mortality (left axis). Cohort and period effects were assessed by relative risk (right axis), 95% confidence intervals are shown as shaded bands.

For peer review only

1  
2 519  
3 520 **Figure 3.** Projections of lung cancer mortality rates by gender and immigrant status from 2022 to 2030. Observations  
4 521 are shown as dots with the predictive distribution between the 5% and 95% quantile, whereby each lighter shade of  
5 522 red represents an additional 10% predictive CI. The predictive mean is shown as black solid line and the vertical  
6 523 dashed line indicates where prediction started.  
7 524

8  
9  
10  
11  
12  
13  
14  
15  
16  
17  
18  
19  
20  
21  
22  
23  
24  
25  
26  
27  
28  
29  
30  
31  
32  
33  
34  
35  
36  
37  
38  
39  
40  
41  
42  
43  
44  
45  
46  
47  
48  
49  
50  
51  
52  
53  
54  
55  
56  
57  
58  
59  
60

For peer review only

1  
2 525  
3 526  
4 527  
5 528  
6 529  
7 530  
8  
9  
10  
11  
12  
13  
14  
15  
16  
17  
18  
19  
20  
21  
22  
23  
24  
25  
26  
27  
28  
29  
30  
31  
32  
33  
34  
35  
36  
37  
38  
39  
40  
41  
42  
43  
44  
45  
46  
47  
48  
49  
50  
51  
52  
53  
54  
55  
56  
57  
58  
59  
60

**Figure 4.** Projections of lung cancer mortality rates for the population younger than 60 by gender and immigrant status from 2022 to 2030. Observations are shown as dots with the predictive distribution between the 5% and 95% quantile, whereby each lighter shade of red represents an additional 10% predictive CI. The predictive mean is shown as black solid line and the vertical dashed line indicates where prediction started.

For peer review only



1  
2  
3  
4  
5  
6  
7  
8  
9  
10  
11  
12  
13  
14  
15  
16  
17  
18  
19  
20  
21  
22  
23  
24  
25  
26  
27  
28  
29  
30  
31  
32  
33  
34  
35  
36  
37  
38  
39  
40  
41  
42  
43  
44  
45  
46  
47  
48  
49  
50  
51  
52  
53  
54  
55  
56  
57  
58  
59  
60

531  
532  
533  
534  
535  
536

**Figure 5.** Projections of lung cancer mortality rates for the population older than or equal to 60 by gender and immigrant status from 2022 to 2030. Observations are shown as dots with the predictive distribution between the 5% and 95% quantile, whereby each lighter shade of red represents an additional 10% predictive CI. The predictive mean is shown as black solid line and the vertical dashed line indicates where prediction started.

For peer review only

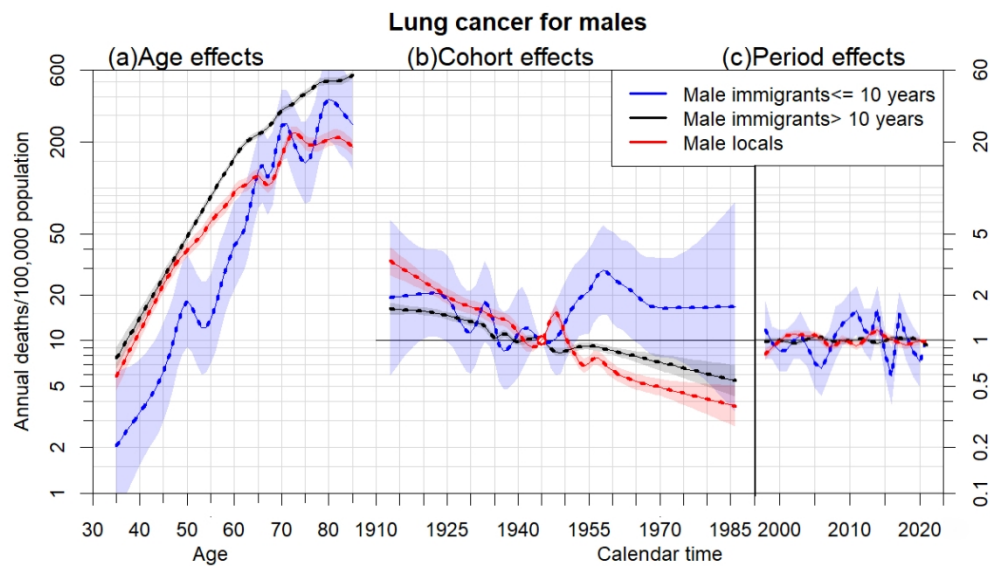

Figure 1. Parameter estimates of age (a), cohort (b) and period (c) effects based on an age-period-cohort model of male lung cancer mortality rates by immigrant groups: locals, immigrants stay in Hong Kong for more than 10 years and immigrants stay in Hong Kong for less than or equal to 10 years. Age effect was assessed by mortality (left axis). Cohort and period effects were assessed by relative risk (right axis), 95% confidence intervals are shown as shaded bands.

533x343mm (57 x 57 DPI)

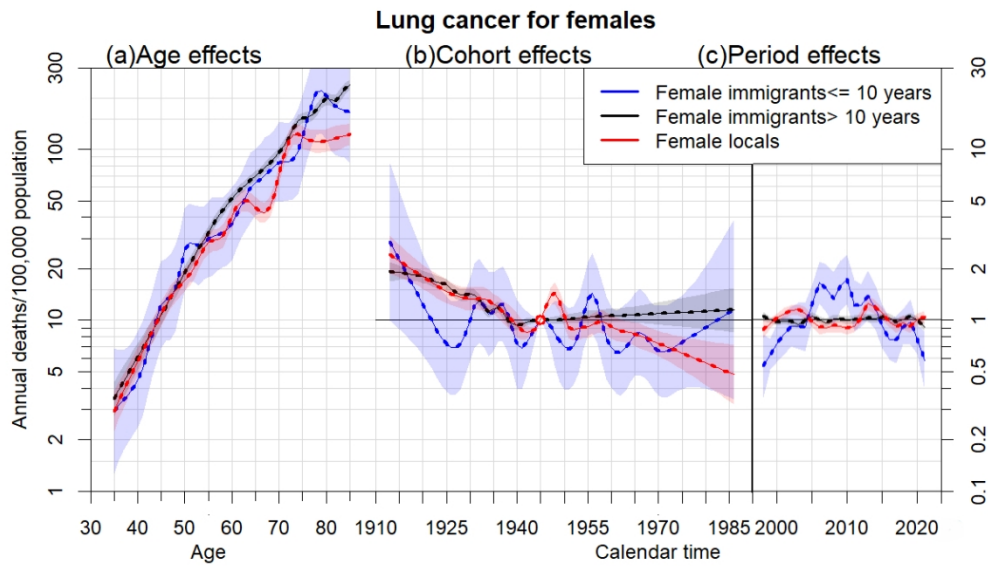

Figure 2. Parameter estimates of age (a), cohort (b) and period (c) effects based on an age-period-cohort model of female lung cancer mortality rates by immigrant groups: locals, immigrants stay in Hong Kong for more than 10 years and immigrants stay in Hong Kong for less than or equal to 10 years. Age effect was assessed by mortality (left axis). Cohort and period effects were assessed by relative risk (right axis), 95% confidence intervals are shown as shaded bands.

533x343mm (57 x 57 DPI)

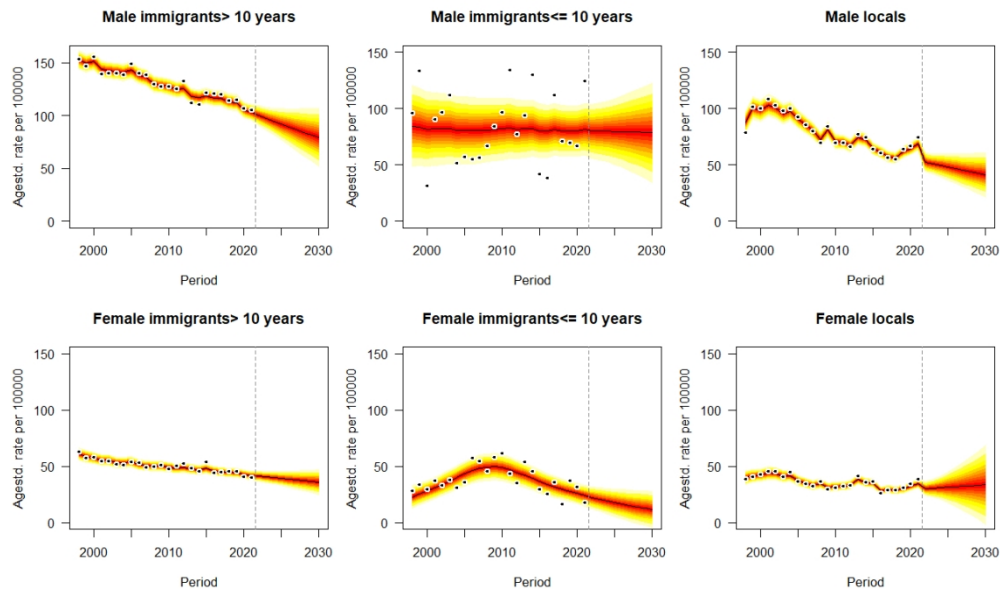

Figure 3. Projections of lung cancer mortality rates by gender and immigrant status from 2022 to 2030. Observations are shown as dots with the predictive distribution between the 5% and 95% quantile, whereby each lighter shade of red represents an additional 10% predictive CI. The predictive mean is shown as black solid line and the vertical dashed line indicates where prediction started.

570x343mm (57 x 57 DPI)

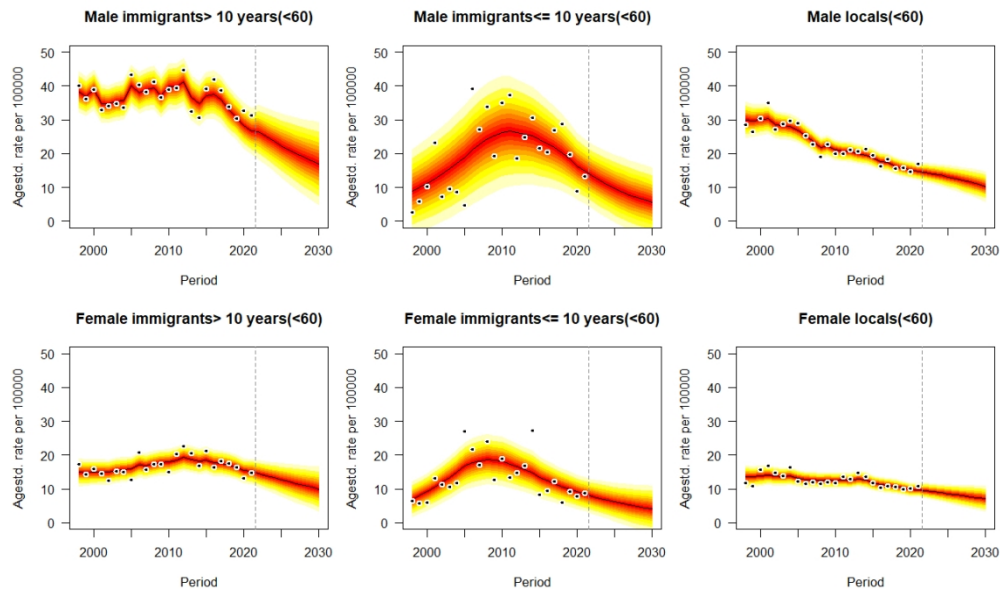

Figure 4. Projections of lung cancer mortality rates for the population younger than 60 by gender and immigrant status from 2022 to 2030. Observations are shown as dots with the predictive distribution between the 5% and 95% quantile, whereby each lighter shade of red represents an additional 10% predictive CI. The predictive mean is shown as black solid line and the vertical dashed line indicates where prediction started.

570x343mm (57 x 57 DPI)

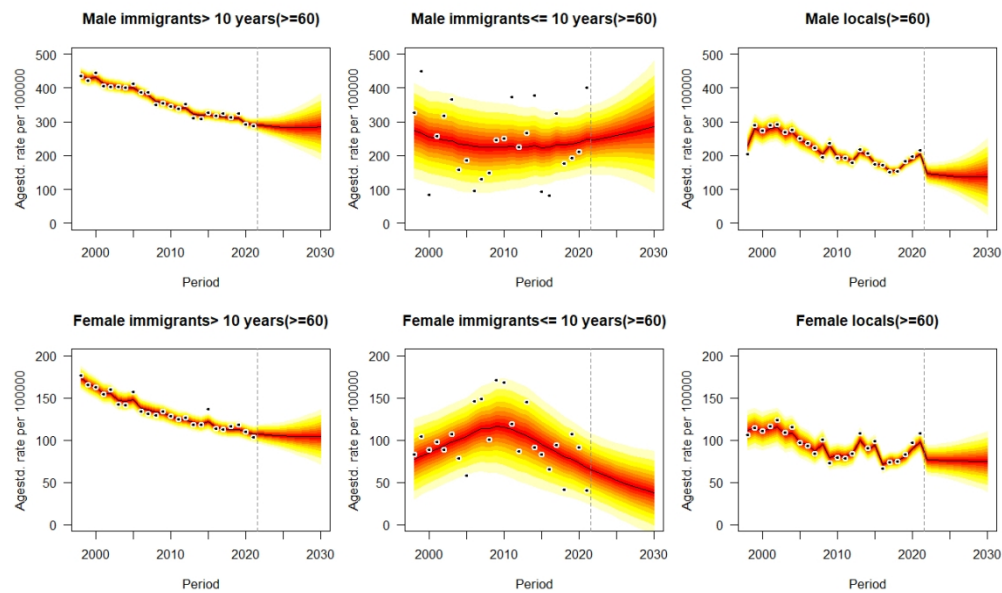

Figure 5. Projections of lung cancer mortality rates for the population older than or equal to 60 by gender and immigrant status from 2022 to 2030. Observations are shown as dots with the predictive distribution between the 5% and 95% quantile, whereby each lighter shade of red represents an additional 10% predictive CI. The predictive mean is shown as black solid line and the vertical dashed line indicates where prediction started.

570x343mm (57 x 57 DPI)

## Supplementary Material for

### “An age-period-cohort analysis and projection of cancer mortality in

### Hong Kong, 1998–2030”

#### APC Figures

|                                      |   |
|--------------------------------------|---|
| eFigure 1(a) Colon cancer .....      | 3 |
| eFigure 1(b) Liver cancer .....      | 4 |
| eFigure 1(c) Pancreatic cancer ..... | 5 |
| eFigure 1(d) Stomach cancer .....    | 6 |
| eFigure 1(e) Prostate cancer .....   | 7 |

#### Projection Figures

|                                                 |    |
|-------------------------------------------------|----|
| Colon cancer                                    |    |
| eFigure 2(a)Projection (all ages) .....         | 8  |
| eFigure 2(b)Projection (<60 years) .....        | 9  |
| eFigure 2(c)Projection ( $\geq$ 60 years) ..... | 10 |
| Liver cancer                                    |    |
| eFigure 3(a)Projection (all ages) .....         | 11 |
| eFigure 3(b)Projection (<60 years) .....        | 12 |
| eFigure 3(c)Projection ( $\geq$ 60 years) ..... | 13 |
| Pancreatic cancer                               |    |
| eFigure 4(a)Projection (all ages) .....         | 14 |
| eFigure 4(b)Projection (<60 years) .....        | 15 |
| eFigure 4(c)Projection ( $\geq$ 60 years) ..... | 16 |
| Stomach cancer                                  |    |
| eFigure 5(a)Projection (all ages) .....         | 17 |
| eFigure 5(b)Projection (<60 years) .....        | 18 |

1  
2  
3  
4  
5  
6  
7  
8  
9  
10  
11  
12  
13  
14  
15  
16  
17  
18  
19  
20  
21  
22  
23  
24  
25  
26  
27  
28  
29  
30  
31  
32  
33  
34  
35  
36  
37  
38  
39  
40  
41  
42  
43  
44  
45  
46  
47  
48  
49  
50  
51  
52  
53  
54  
55  
56  
57  
58  
59  
60

eFigure 5(c)Projection ( $\geq 60$  years)..... 19

Prostate cancer

eFigure 6 Projection (all ages,  $<60$  years and  $\geq 60$  years)..... 20

**Tables**

eTable 1 Lung cancer..... 21

eTable 2 Colon cancer..... 22

eTable 3 Liver cancer ..... 23

eTable 4 Pancreatic cancer ..... 24

eTable 5 Stomach cancer ..... 25

eTable 6 Prostate cancer ..... 26

peer review only



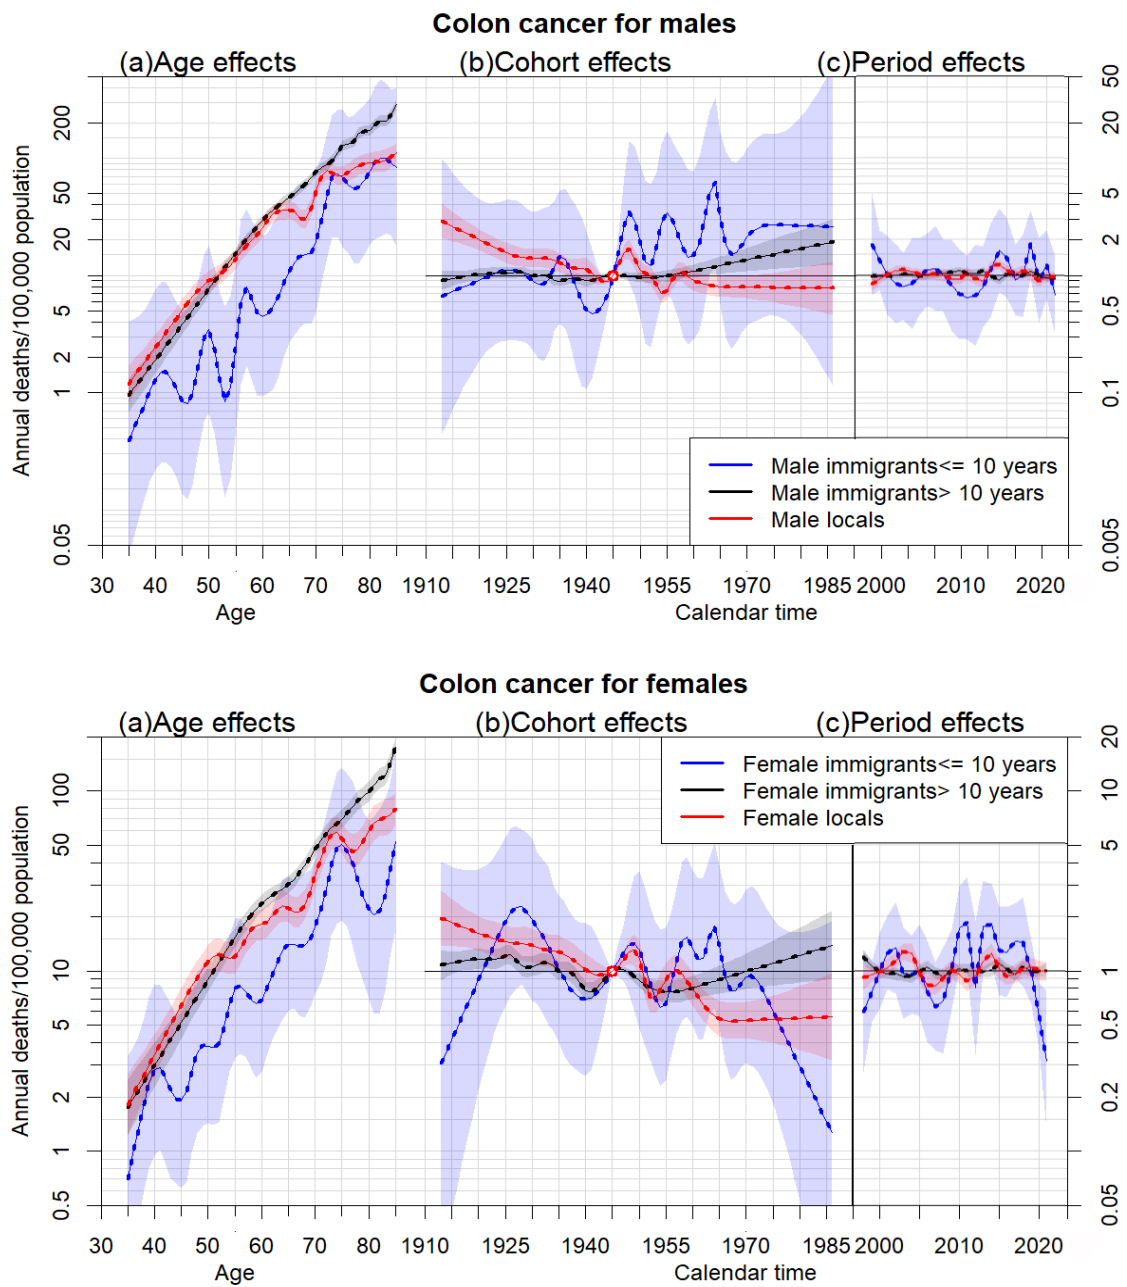

**eFigure 1(a).** Parameter estimates of age (a), cohort (b) and period (c) effects based on an age-period-cohort model of male and female colon cancer mortality rates by immigrant groups: locals, immigrants stay in Hong Kong for more than 10 years and immigrants stay in Hong Kong for less than or equal to 10 years. Age effect was assessed by mortality (left axis). Cohort and period effects were assessed by relative risk (right axis), 95% confidence intervals are shown as shaded bands.

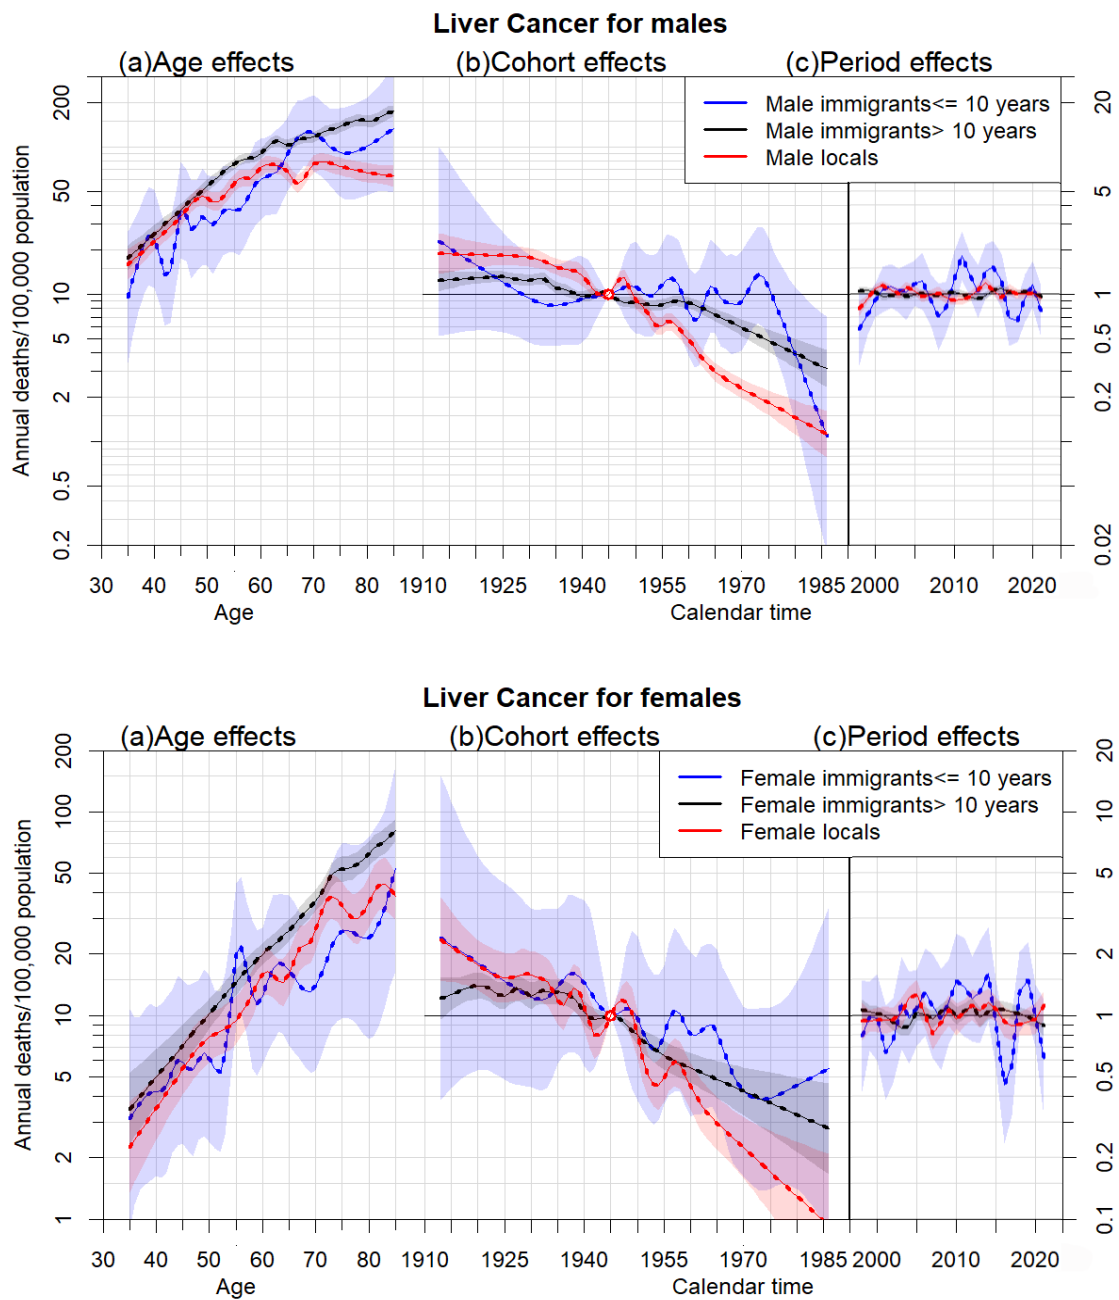

**eFigure 1(b).** Parameter estimates of age (a), cohort (b) and period (c) effects based on an age-period-cohort model of male and female liver cancer mortality rates by immigrant groups: locals, immigrants stay in Hong Kong for more than 10 years and immigrants stay in Hong Kong for less than or equal to 10 years. Age effect was assessed by mortality (left axis). Cohort and period effects were assessed by relative risk (right axis), 95% confidence intervals are shown as shaded bands.

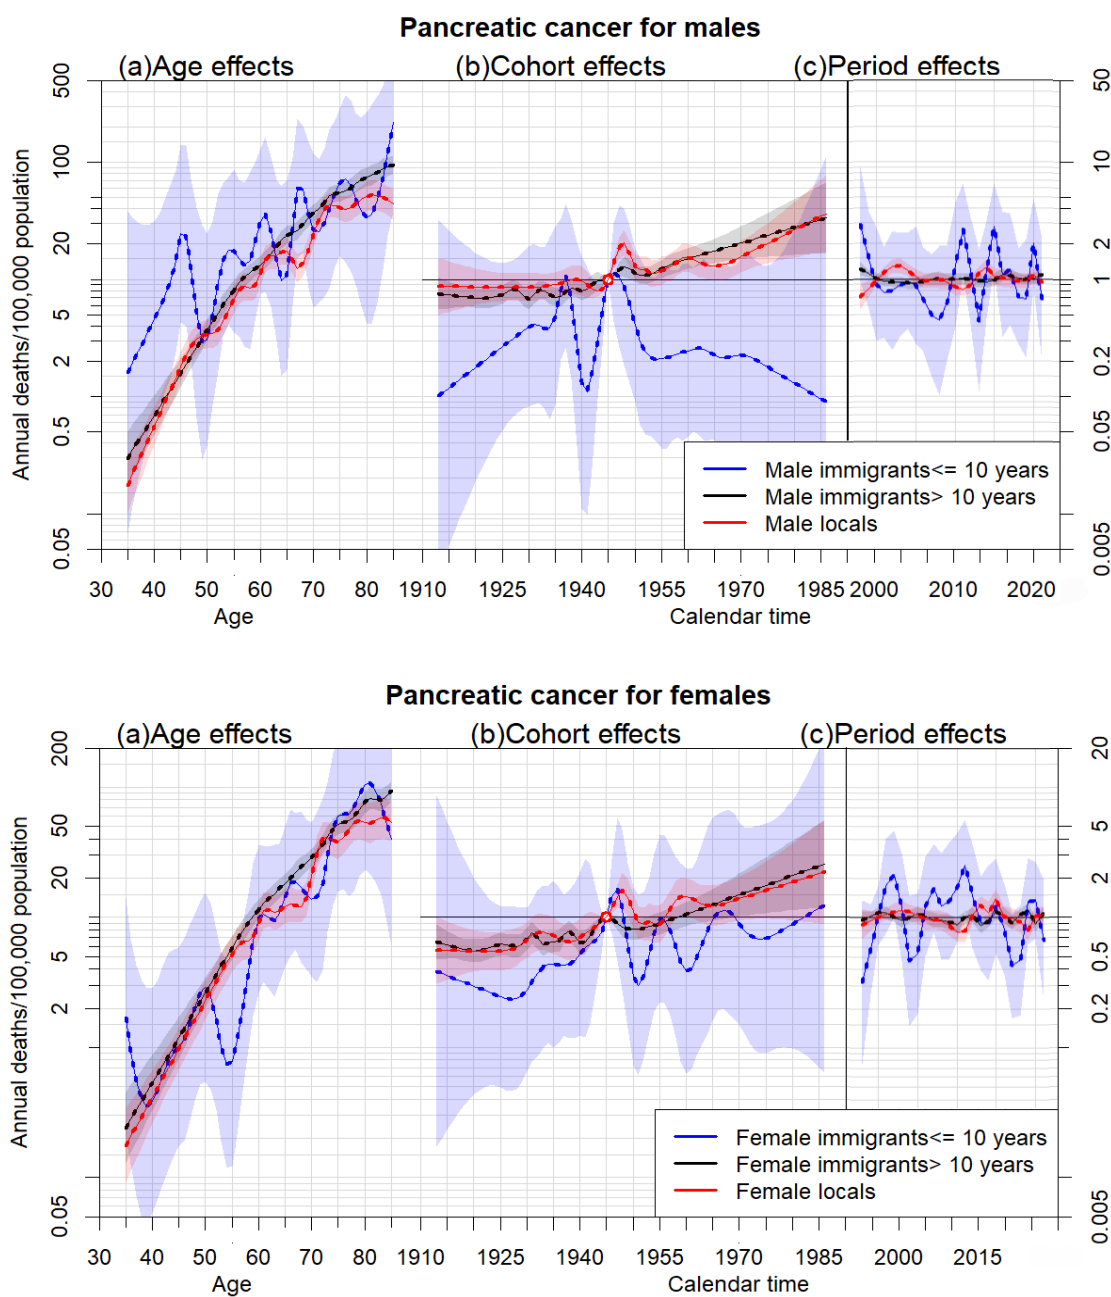

**eFigure 1(c).** Parameter estimates of age (a), cohort (b) and period (c) effects based on an age-period-cohort model of male and female pancreatic cancer mortality rates by immigrant groups: locals, immigrants stay in Hong Kong for more than 10 years and immigrants stay in Hong Kong for less than or equal to 10 years. Age effect was assessed by mortality (left axis). Cohort and period effects were assessed by relative risk (right axis), 95% confidence intervals are shown as shaded bands.

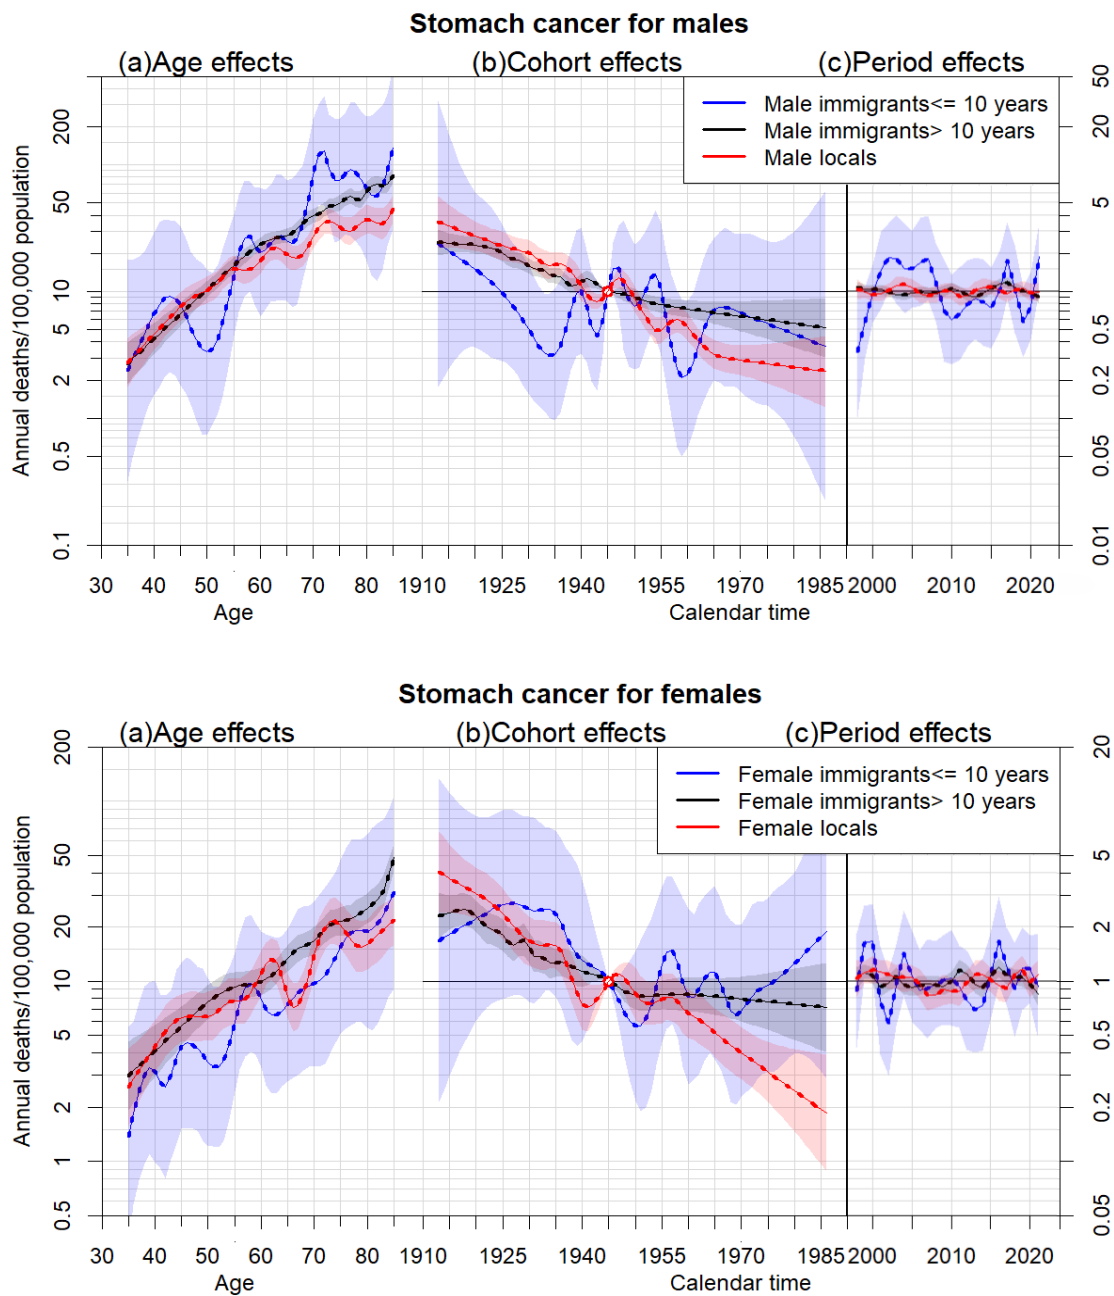

**eFigure 1(d).** Parameter estimates of age (a), cohort (b) and period (c) effects based on an age-period-cohort model of male and female stomach cancer mortality rates by immigrant groups: locals, immigrants stay in Hong Kong for more than 10 years and immigrants stay in Hong Kong for less than or equal to 10 years. Age effect was assessed by mortality (left axis). Cohort and period effects were assessed by relative risk (right axis), 95% confidence intervals are shown as shaded bands.



**eFigure 1(e).** Parameter estimates of age (a), cohort (b) and period (c) effects based on an age-period-cohort model of male prostate cancer mortality rates by immigrant groups: locals, immigrants stay in Hong Kong for more than 10 years and immigrants stay in Hong Kong for less than or equal to 10 years. Age effect was assessed by mortality (left axis). Cohort and period effects were assessed by relative risk (right axis), 95% confidence intervals are shown as shaded bands.

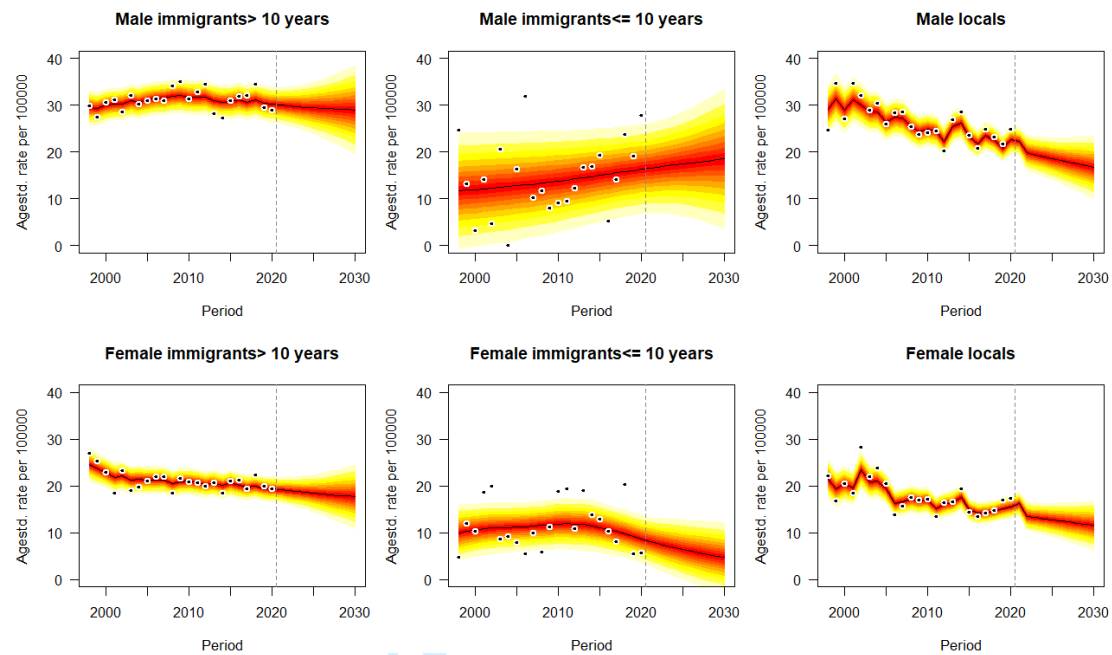

**eFigure 2(a).** Projections of colon cancer mortality rates by gender and immigrant status from 2022 to 2030. Observations are shown as dots with the predictive distribution between the 5% and 95% quantile, whereby each lighter shade of red represents an additional 10% predictive CI. The predictive mean is shown as black solid line and the vertical dashed line indicates where prediction started.

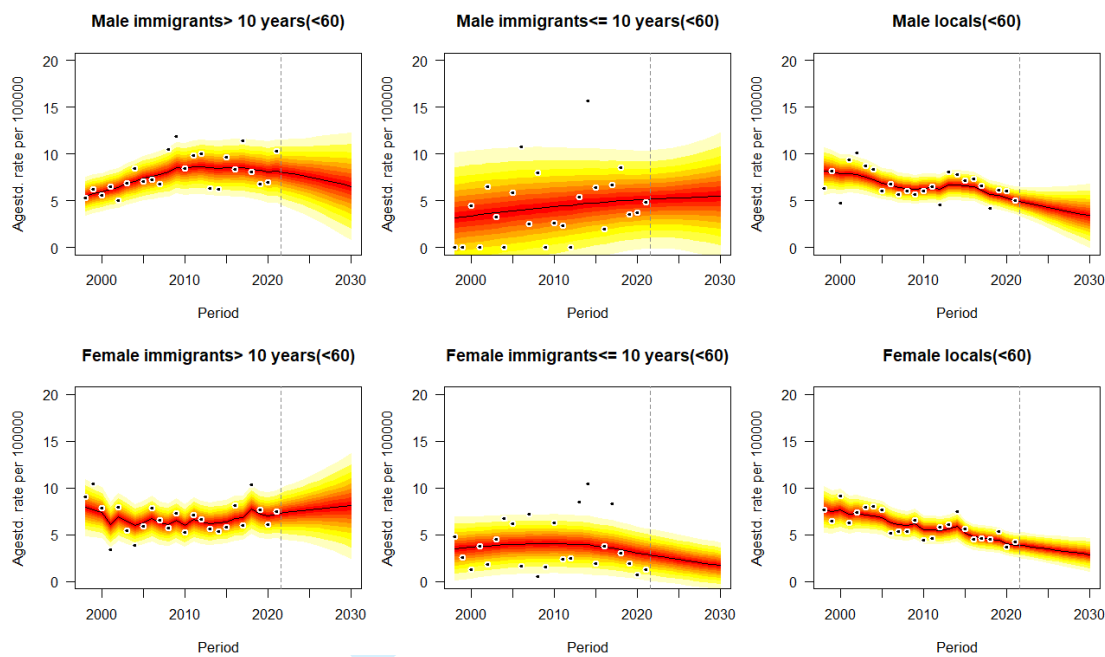

**eFigure 2(b).** Projections of colon cancer mortality rates for the population younger than 60 by gender and immigrant status from 2022 to 2030. Observations are shown as dots with the predictive distribution between the 5% and 95% quantile, whereby each lighter shade of red represents an additional 10% predictive CI. The predictive mean is shown as black solid line and the vertical dashed line indicates where prediction started.

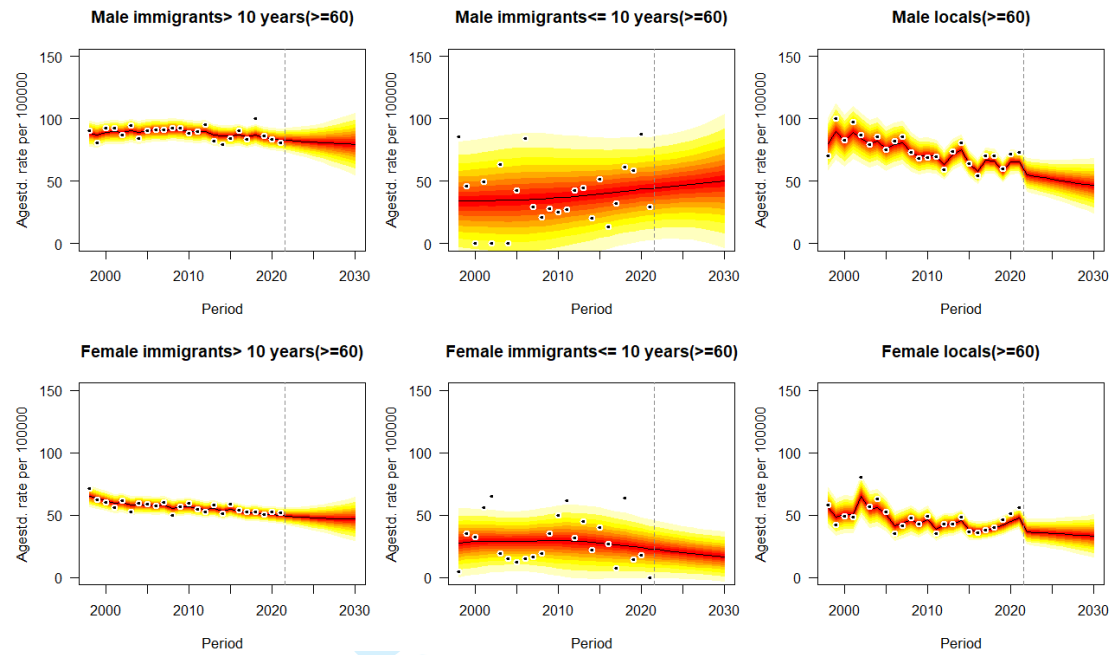

**eFigure 2(c).** Projections of colon cancer mortality rates for the population older than or equal to 60 by gender and immigrant status from 2022 to 2030. Observations are shown as dots with the predictive distribution between the 5% and 95% quantile, whereby each lighter shade of red represents an additional 10% predictive CI. The predictive mean is shown as black solid line and the vertical dashed line indicates where prediction started.



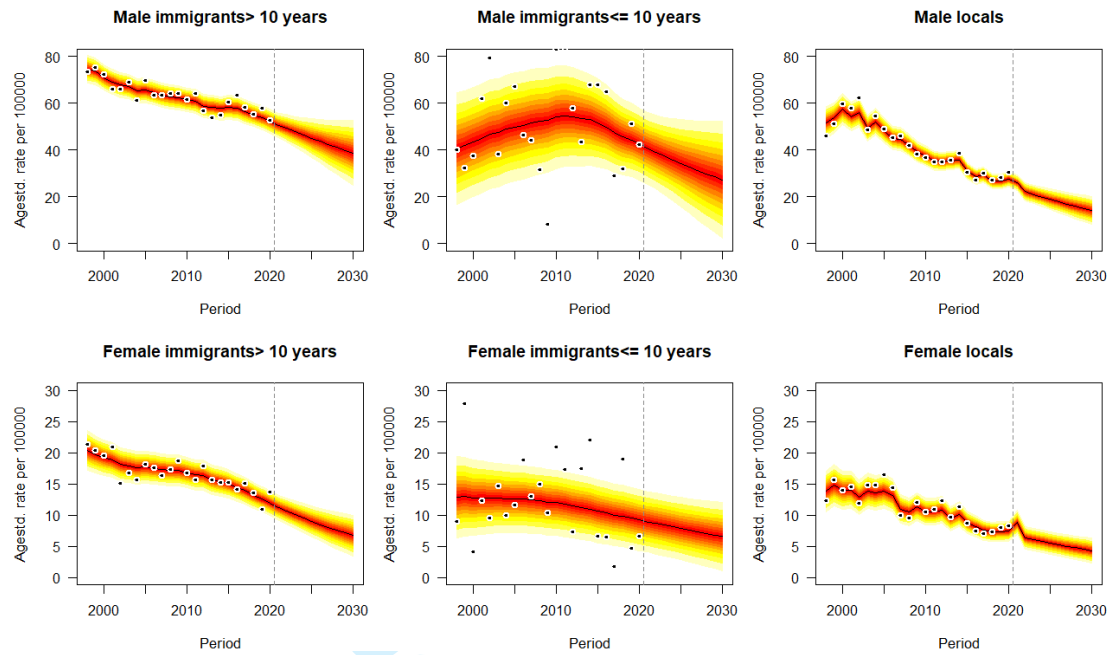

**eFigure 3(a).** Projections of liver cancer mortality rates by gender and immigrant status from 2022 to 2030. Observations are shown as dots with the predictive distribution between the 5% and 95% quantile, whereby each lighter shade of red represents an additional 10% predictive CI. The predictive mean is shown as black solid line and the vertical dashed line indicates where prediction started.

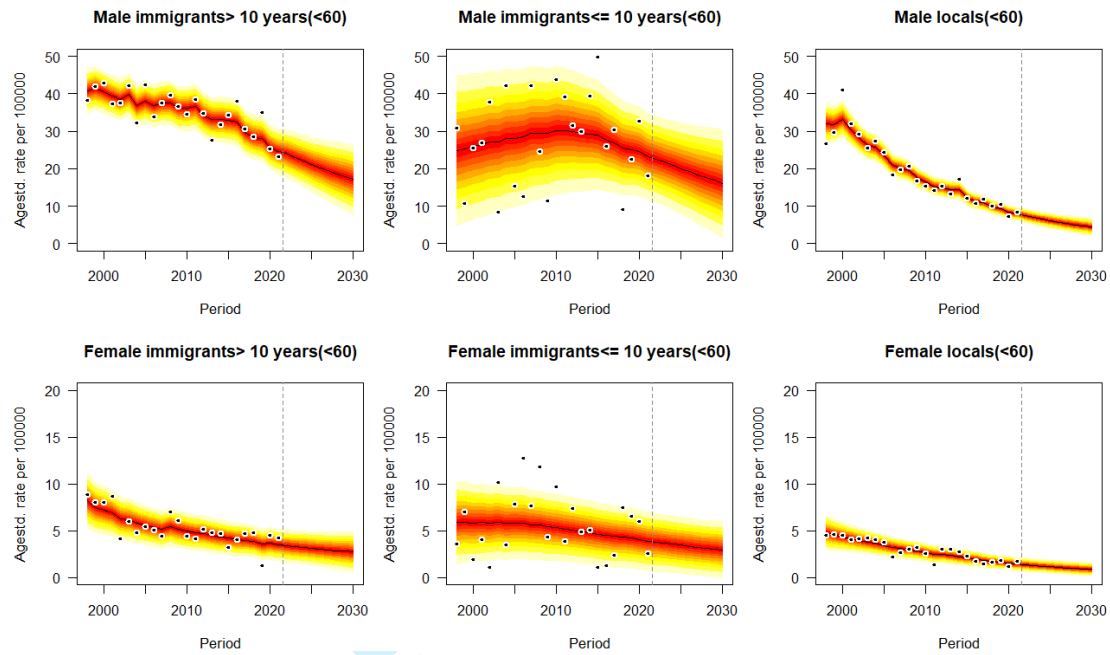

**eFigure 3(b).** Projections of liver cancer mortality rates for the population younger than 60 by gender and immigrant status from 2022 to 2030. Observations are shown as dots with the predictive distribution between the 5% and 95% quantile, whereby each lighter shade of red represents an additional 10% predictive CI. The predictive mean is shown as black solid line and the vertical dashed line indicates where prediction started.

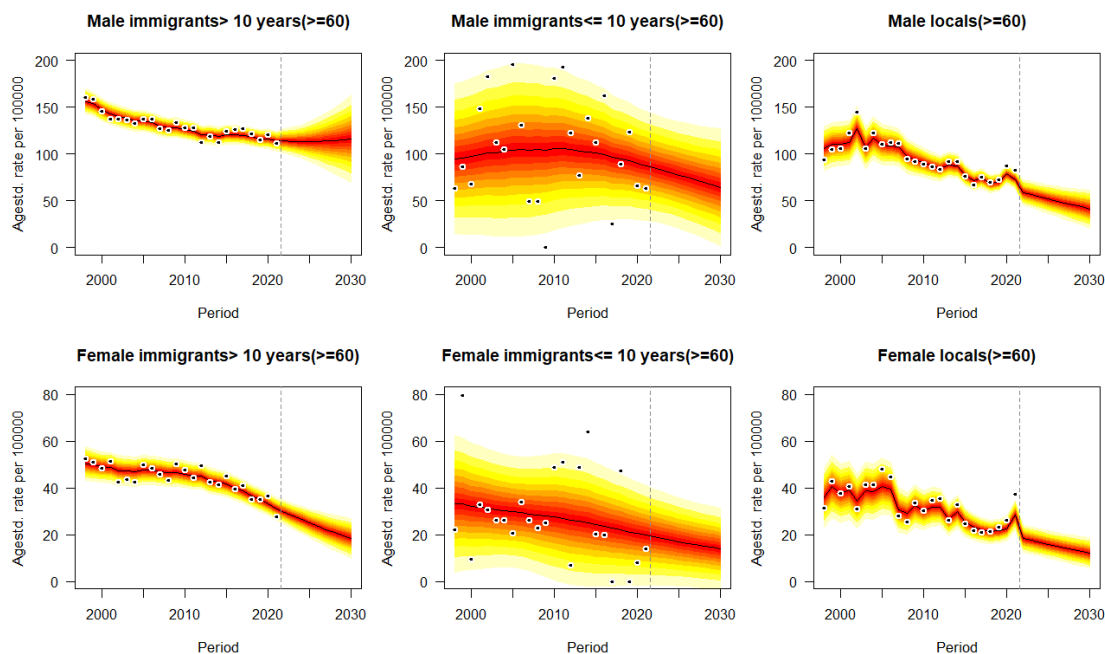

**eFigure 3(c).** Projections of liver cancer mortality rates for the population older than or equal to 60 by gender and immigrant status from 2022 to 2030. Observations are shown as dots with the predictive distribution between the 5% and 95% quantile, whereby each lighter shade of red represents an additional 10% predictive CI. The predictive mean is shown as black solid line and the vertical dashed line indicates where prediction started.

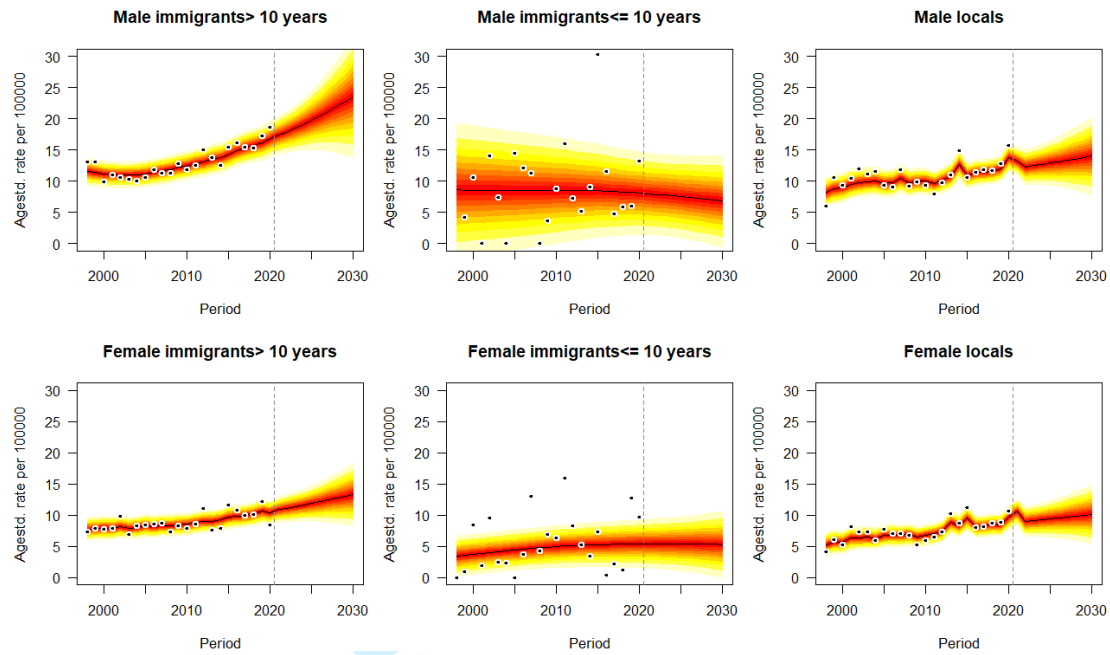

**eFigure 4(a).** Projections of pancreatic cancer mortality rates by gender and immigrant status from 2022 to 2030. Observations are shown as dots with the predictive distribution between the 5% and 95% quantile, whereby each lighter shade of red represents an additional 10% predictive CI. The predictive mean is shown as black solid line and the vertical dashed line indicates where prediction started.

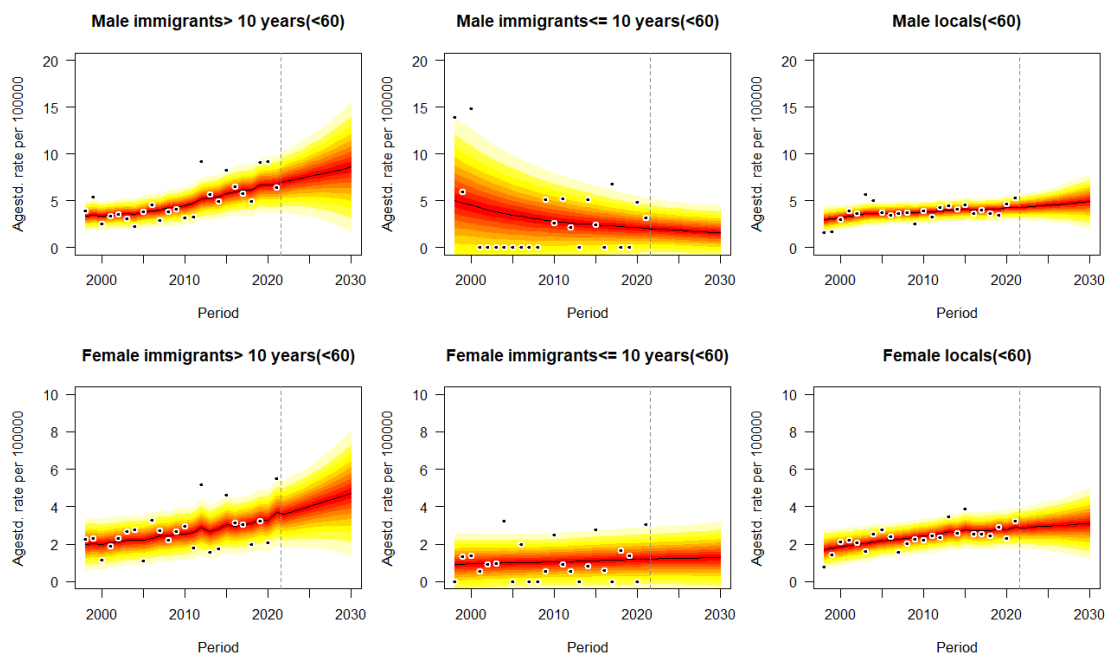

**eFigure 4(b).** Projections of pancreatic cancer mortality rates for the population younger than 60 by gender and immigrant status from 2022 to 2030. Observations are shown as dots with the predictive distribution between the 5% and 95% quantile, whereby each lighter shade of red represents an additional 10% predictive CI. The predictive mean is shown as black solid line and the vertical dashed line indicates where prediction started.

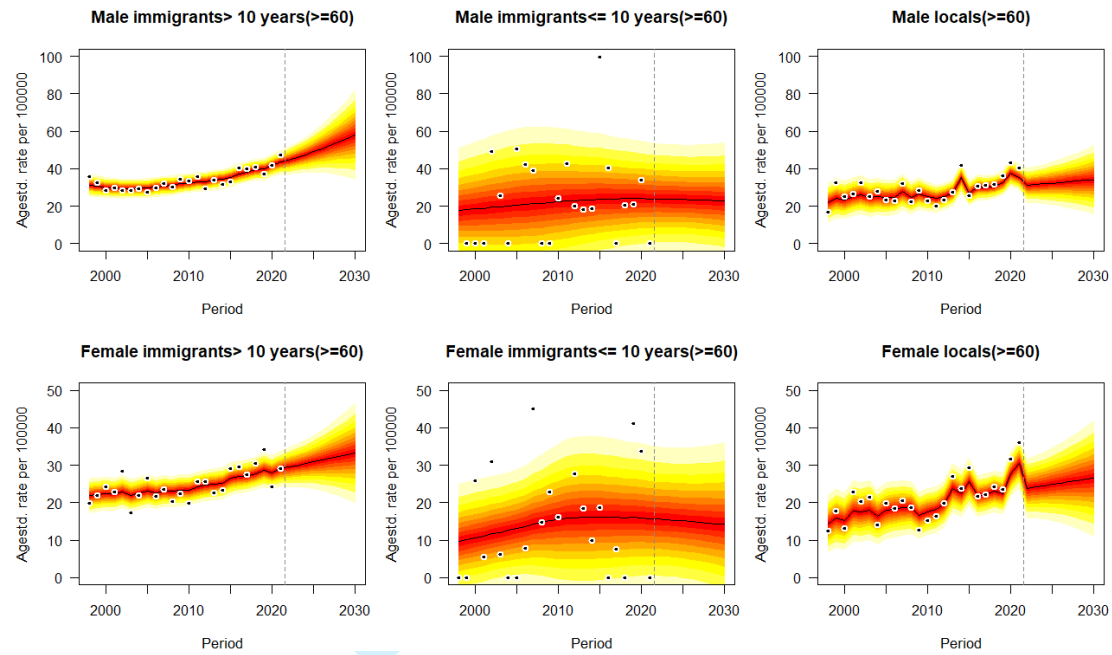

**eFigure 4(c).** Projections of pancreatic cancer mortality rates for the population older than or equal to 60 by gender and immigrant status from 2022 to 2030. Observations are shown as dots with the predictive distribution between the 5% and 95% quantile, whereby each lighter shade of red represents an additional 10% predictive CI. The predictive mean is shown as black solid line and the vertical dashed line indicates where prediction started.

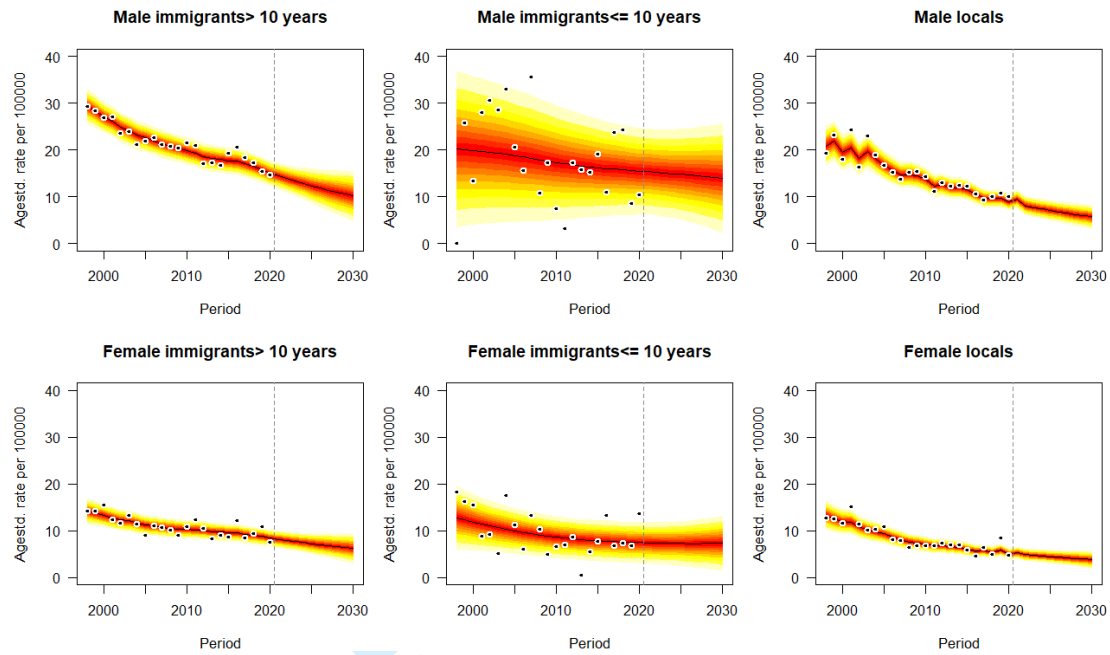

**eFigure 5(a).** Projections of stomach cancer mortality rates by gender and immigrant status from 2022 to 2030. Observations are shown as dots with the predictive distribution between the 5% and 95% quantile, whereby each lighter shade of red represents an additional 10% predictive CI. The predictive mean is shown as black solid line and the vertical dashed line indicates where prediction started.

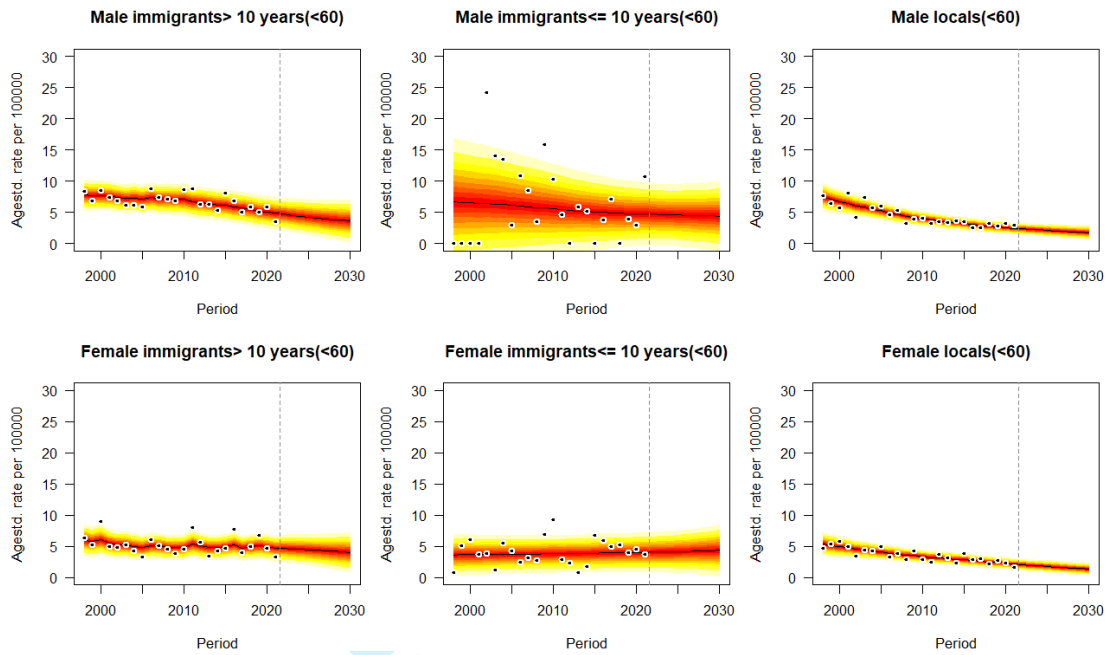

**eFigure 5(b).** Projections of stomach cancer mortality rates for the population younger than 60 by gender and immigrant status from 2022 to 2030. Observations are shown as dots with the predictive distribution between the 5% and 95% quantile, whereby each lighter shade of red represents an additional 10% predictive CI. The predictive mean is shown as black solid line and the vertical dashed line indicates where prediction started.



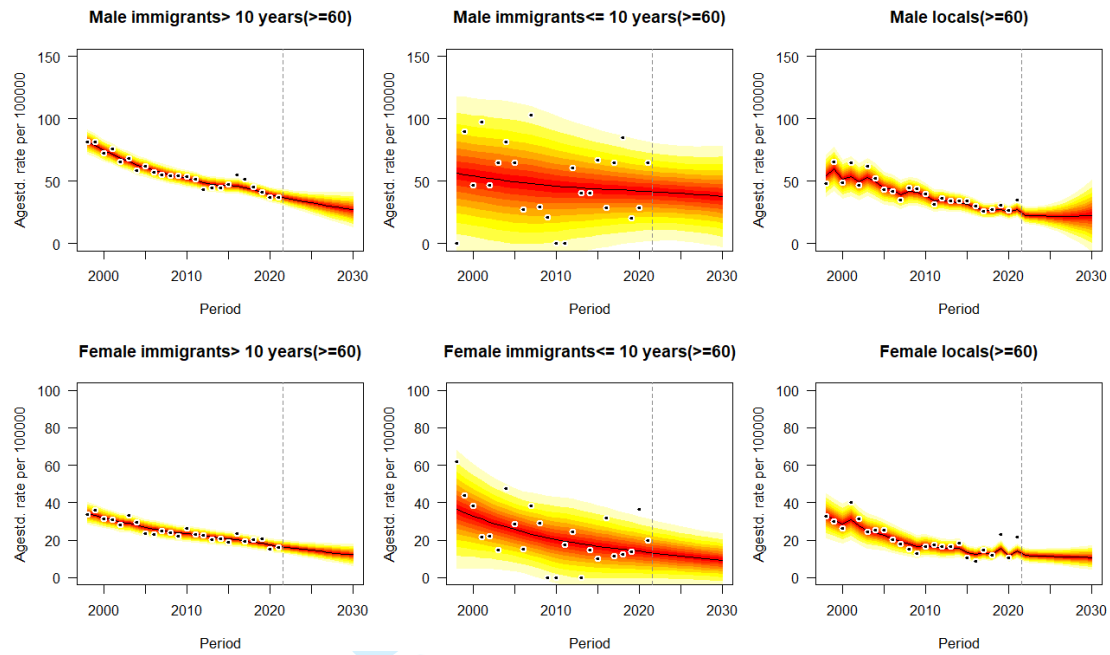

**eFigure 5(c).** Projections of stomach cancer mortality rates for the population older than or equal to 60 by gender and immigrant status from 2022 to 2030. Observations are shown as dots with the predictive distribution between the 5% and 95% quantile, whereby each lighter shade of red represents an additional 10% predictive CI. The predictive mean is shown as black solid line and the vertical dashed line indicates where prediction started.

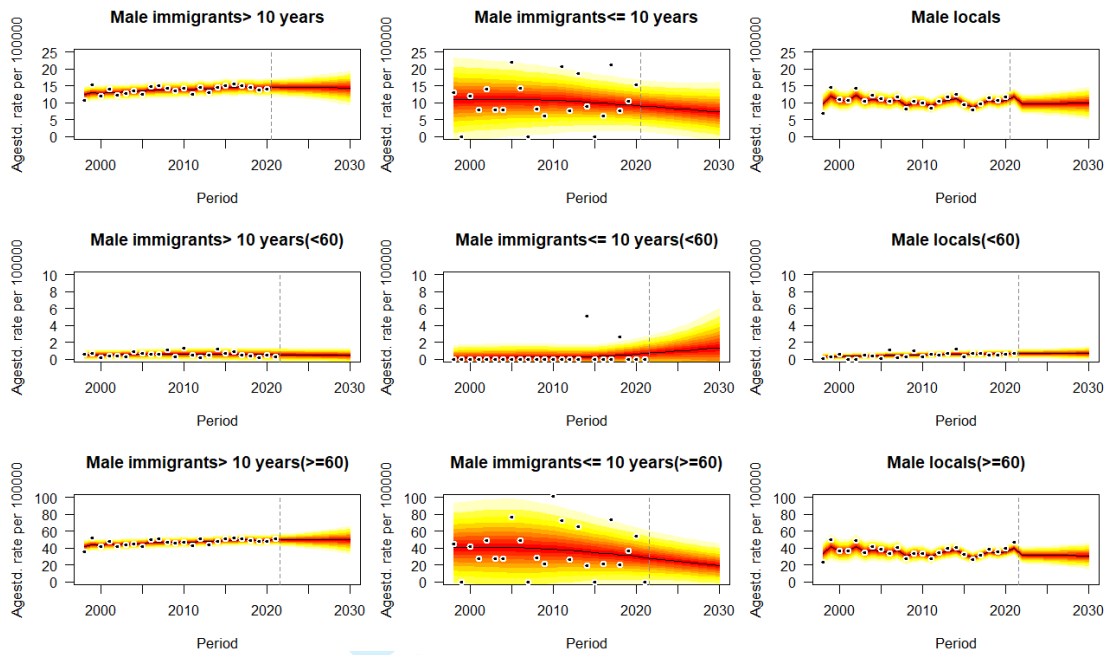

**eFigure 6.** Projections of prostate cancer mortality rates for males by immigrant status and age groups (less than, greater than or equal to 60 years old) from 2022 to 2030. Observations are shown as dots with the predictive distribution between the 5% and 95% quantile, whereby each lighter shade of red represents an additional 10% predictive CI. The predictive mean is shown as black solid line and the vertical dashed line indicates where prediction started.

| Predictive mean of age-standardized mortality rates of lung cancer per 100,000 population |                   |                   |                   |                   |                   |                   |                   |                   |                   |                    |
|-------------------------------------------------------------------------------------------|-------------------|-------------------|-------------------|-------------------|-------------------|-------------------|-------------------|-------------------|-------------------|--------------------|
| Year                                                                                      | 2021              | 2022              | 2023              | 2024              | 2025              | 2026              | 2027              | 2028              | 2029              | 2030               |
| Female immigrants >10                                                                     | 41.80<br>(1.27)   | 41.34<br>(1.86)   | 40.58<br>(2.27)   | 39.87<br>(2.75)   | 39.19<br>(3.28)   | 38.53<br>(3.86)   | 37.89<br>(4.46)   | 37.26<br>(5.09)   | 36.65<br>(5.74)   | 36.04<br>(6.4)     |
| Female immigrants ≤ 10                                                                    | 23.92<br>(4.00)   | 22.22<br>(4.67)   | 20.56<br>(5.38)   | 19.01<br>(6.10)   | 17.57<br>(6.80)   | 16.24<br>(7.45)   | 15.00<br>(8.04)   | 13.85<br>(8.56)   | 12.79<br>(9.01)   | 11.81<br>(9.39)    |
| Female locals                                                                             | 34.67<br>(1.76)   | 30.22<br>(3.54)   | 30.63<br>(4.77)   | 31.05<br>(6.38)   | 31.48<br>(8.29)   | 31.9<br>(10.47)   | 32.32<br>(12.87)  | 32.73<br>(15.48)  | 33.15<br>(18.31)  | 33.55<br>(21.33)   |
| Male immigrants >10                                                                       | 102.90<br>(2.43)  | 100.18<br>(4.18)  | 97.18<br>(5.33)   | 94.34<br>(6.72)   | 91.71<br>(8.24)   | 89.15<br>(9.84)   | 86.66<br>(11.47)  | 84.19<br>(13.11)  | 81.81<br>(14.74)  | 79.55<br>(16.37)   |
| Male immigrants ≤10                                                                       | 81.26<br>(9.21)   | 79.90<br>(10.41)  | 79.81<br>(11.82)  | 79.72<br>(13.42)  | 79.62<br>(15.19)  | 79.50<br>(17.09)  | 79.32<br>(19.09)  | 79.08<br>(21.18)  | 78.78<br>(23.32)  | 78.41<br>(25.53)   |
| Male locals                                                                               | 60.96<br>(2.82)   | 52.27<br>(4.86)   | 50.83<br>(5.39)   | 49.56<br>(6.13)   | 48.18<br>(6.97)   | 46.64<br>(7.84)   | 45.13<br>(8.76)   | 43.83<br>(9.76)   | 42.67<br>(10.8)   | 41.43<br>(11.8)    |
| Female immigrants>10(<60y)                                                                | 15.51<br>(1.12)   | 14.51<br>(1.50)   | 13.90<br>(1.76)   | 13.29<br>(2.04)   | 12.71<br>(2.33)   | 12.13<br>(2.62)   | 11.57<br>(2.91)   | 11.02<br>(3.18)   | 10.49<br>(3.43)   | 9.98<br>(3.68)     |
| Female immigrants ≤ 10(<60y)                                                              | 8.14<br>(1.91)    | 7.79<br>(1.95)    | 7.18(2.23)        | 6.62(2.53)        | 6.10(2.81)        | 5.63(3.08)        | 5.19(3.32)        | 4.79<br>(3.53)    | 4.42<br>(3.72)    | 4.09<br>(3.88)     |
| Female locals(<60y)                                                                       | 10.25<br>(0.77)   | 9.48<br>(0.89)    | 9.17(1.02)        | 8.87(1.16)        | 8.57(1.32)        | 8.27(1.49)        | 7.97(1.65)        | 7.68<br>(1.82)    | 7.38<br>(1.98)    | 7.09<br>(2.13)     |
| Male immigrants>10(<60y)                                                                  | 27.81<br>(2.10)   | 26.36<br>(3.58)   | 24.96<br>(3.94)   | 23.64<br>(4.35)   | 22.38<br>(4.79)   | 21.17<br>(5.23)   | 20.03<br>(5.67)   | 18.96<br>(6.10)   | 17.96<br>(6.51)   | 17.03<br>(6.90)    |
| Male immigrants ≤ 10(<60y)                                                                | 15.01<br>(2.98)   | 13.38<br>(3.71)   | 12.02<br>(4.17)   | 10.79<br>(4.59)   | 9.68<br>(4.95)    | 8.69<br>(5.24)    | 7.79<br>(5.46)    | 6.98<br>(5.61)    | 6.25<br>(5.69)    | 5.59<br>(5.72)     |
| Male locals(<60y)                                                                         | 15.19<br>(0.78)   | 14.45<br>(1.15)   | 14.03<br>(1.29)   | 13.61<br>(1.46)   | 13.14<br>(1.64)   | 12.65<br>(1.82)   | 12.13<br>(2.01)   | 11.55<br>(2.17)   | 10.93<br>(2.31)   | 10.26<br>(2.43)    |
| Female immigrants >10(≥ 60y)                                                              | 108.85<br>(4.80)  | 107.21<br>(5.17)  | 106.26<br>(6.24)  | 105.52<br>(7.54)  | 104.94<br>(9.04)  | 104.51<br>(10.72) | 104.21<br>(12.57) | 104.07<br>(14.61) | 104.06<br>(16.78) | 104.16<br>(19.14)  |
| Female immigrants ≤ 10(≥60y)                                                              | 66.16<br>(13.25)  | 63.84<br>(15.72)  | 59.88<br>(17.50)  | 56.14<br>(19.31)  | 52.60<br>(21.03)  | 49.27<br>(22.66)  | 46.14<br>(24.16)  | 43.20<br>(25.52)  | 40.44<br>(26.74)  | 37.85<br>(27.81)   |
| Female locals(≥60y)                                                                       | 77.33<br>(9.40)   | 76.53<br>(10.11)  | 76.22<br>(10.85)  | 75.94<br>(11.79)  | 75.69<br>(12.94)  | 75.49<br>(14.28)  | 75.32<br>(15.80)  | 75.19<br>(17.48)  | 75.10<br>(19.33)  | 75.03<br>(21.32)   |
| Male immigrants>10(≥60y)                                                                  | 293.56<br>(9.13)  | 289.8<br>(11.7)   | 286.6<br>(15.19)  | 284.28<br>(19.51) | 282.78<br>(24.49) | 281.99<br>(30.07) | 281.88<br>(36.31) | 282.31<br>(43.15) | 283.37<br>(50.66) | 285.03<br>(58.86)  |
| Male immigrants ≤ 10(≥60y)                                                                | 244.88<br>(30.29) | 247.01<br>(36.85) | 251.24<br>(42.94) | 255.62<br>(50.06) | 260.14<br>(58.14) | 264.82<br>(67.14) | 269.61<br>(77.01) | 274.52<br>(87.75) | 279.55<br>(99.34) | 284.69<br>(111.81) |
| Male locals(≥60y)                                                                         | 150.75<br>(16.22) | 146.29<br>(18.46) | 143.54<br>(20.58) | 141.84<br>(23.97) | 140.07<br>(28.24) | 138.14<br>(33.39) | 136.65<br>(39.82) | 136.49<br>(47.87) | 137.24<br>(57.47) | 138.26<br>(68.52)  |

**eTable 1.** Predictive means and standard deviations (in brackets) of age-standardized mortality rates of lung cancer per 100,000 population for each gender, age group (less than, greater or equal to 60 years old) and immigrant status from 2022 to 2030. Reported means and standard deviations (in brackets) of age-standardized mortality rates in 2021 are also listed.

| Predictive mean of age-standardized mortality rates of colon cancer per 100,000 population |                  |                  |                  |                  |                  |                  |                  |                  |                  |                  |
|--------------------------------------------------------------------------------------------|------------------|------------------|------------------|------------------|------------------|------------------|------------------|------------------|------------------|------------------|
| Year                                                                                       | 2021             | 2022             | 2023             | 2024             | 2025             | 2026             | 2027             | 2028             | 2029             | 2030             |
| Female immigrants >10                                                                      | 20.03<br>(0.95)  | 18.95<br>(1.13)  | 18.77<br>(1.37)  | 18.59<br>(1.66)  | 18.42<br>(1.98)  | 18.27<br>(2.33)  | 18.12<br>(2.71)  | 17.98<br>(3.11)  | 17.85<br>(3.53)  | 17.73<br>(3.96)  |
| Female immigrants ≤ 10                                                                     | 8.11<br>(2.19)   | 7.70<br>(2.51)   | 7.25<br>(2.81)   | 6.82<br>(3.11)   | 6.42<br>(3.37)   | 6.03<br>(3.61)   | 5.67<br>(3.83)   | 5.33<br>(4.01)   | 5.01<br>(4.17)   | 4.71<br>(4.31)   |
| Female locals                                                                              | 13.77<br>(1.30)  | 13.47<br>(1.61)  | 13.24<br>(1.72)  | 13.01<br>(1.87)  | 12.77<br>(2.04)  | 12.53<br>(2.24)  | 12.29<br>(2.46)  | 12.06<br>(2.68)  | 11.82<br>(2.92)  | 11.59<br>(3.16)  |
| Male immigrants >10                                                                        | 31.22<br>(1.28)  | 29.82<br>(1.46)  | 29.66<br>(1.79)  | 29.52<br>(2.19)  | 29.41<br>(2.63)  | 29.30<br>(3.11)  | 29.21<br>(3.64)  | 29.14<br>(4.19)  | 29.06<br>(4.78)  | 28.98<br>(5.39)  |
| Male immigrants ≤ 10                                                                       | 15.47<br>(2.14)  | 16.77<br>(3.77)  | 17.02<br>(4.18)  | 17.23<br>(4.64)  | 17.45<br>(5.14)  | 17.67<br>(5.69)  | 17.88<br>(6.27)  | 18.09<br>(6.91)  | 18.31<br>(7.56)  | 18.50<br>(8.26)  |
| Male locals                                                                                | 21.28<br>(1.38)  | 19.81<br>(2.07)  | 19.39<br>(2.22)  | 18.97<br>(2.42)  | 18.57<br>(2.61)  | 18.18<br>(2.85)  | 17.81<br>(3.12)  | 17.43<br>(3.40)  | 17.06<br>(3.71)  | 16.71<br>(4.03)  |
| Female immigrants >10(<60y)                                                                | 7.09<br>(0.99)   | 7.36<br>(1.12)   | 7.46<br>(1.28)   | 7.56<br>(1.46)   | 7.65<br>(1.68)   | 7.74<br>(1.92)   | 7.83<br>(2.19)   | 7.92<br>(2.48)   | 8.01<br>(2.79)   | 8.09<br>(3.13)   |
| Female immigrants ≤ 10(<60y)                                                               | 3.11<br>(0.67)   | 2.82<br>(0.86)   | 2.65<br>(0.91)   | 2.51<br>(0.97)   | 2.36<br>(1.02)   | 2.22<br>(1.07)   | 2.08<br>(1.11)   | 1.95<br>(1.14)   | 1.83<br>(1.18)   | 1.72<br>(1.22)   |
| Female locals(<60y)                                                                        | 4.10<br>(0.41)   | 3.87<br>(0.50)   | 3.73<br>(0.54)   | 3.61<br>(0.59)   | 3.47<br>(0.65)   | 3.34<br>(0.70)   | 3.22<br>(0.76)   | 3.11<br>(0.82)   | 2.99<br>(0.88)   | 2.88<br>(0.94)   |
| Male immigrants >10(<60y)                                                                  | 8.29<br>(0.91)   | 7.98<br>(1.17)   | 7.85<br>(1.38)   | 7.71<br>(1.60)   | 7.54<br>(1.83)   | 7.36<br>(2.08)   | 7.17(2.32)       | 6.97(2.57)       | 6.76(2.81)       | 6.55(3.05)       |
| Male immigrants ≤ 10(<60y)                                                                 | 5.03<br>(1.44)   | 5.18<br>(1.58)   | 5.22<br>(1.75)   | 5.26<br>(1.93)   | 5.30<br>(2.14)   | 5.34<br>(2.36)   | 5.38(2.59)       | 5.43(2.84)       | 5.47(3.11)       | 5.51(3.38)       |
| Male locals(<60y)                                                                          | 5.14<br>(0.43)   | 4.88<br>(0.63)   | 4.66<br>(0.79)   | 4.46<br>(0.96)   | 4.26<br>(1.13)   | 4.08<br>(1.31)   | 3.91(1.48)       | 3.73(1.65)       | 3.57(1.82)       | 3.42(1.97)       |
| Female immigrants >10(≥60y)                                                                | 52.16<br>(2.59)  | 49.21<br>(2.99)  | 48.70<br>(3.56)  | 48.26<br>(4.26)  | 47.87<br>(5.05)  | 47.54<br>(5.94)  | 47.26<br>(6.90)  | 47.05<br>(7.94)  | 46.91<br>(9.06)  | 46.81<br>(10.26) |
| Female immigrants ≤ 10(≥60y)                                                               | 24.01<br>(5.83)  | 22.44<br>(6.56)  | 21.69<br>(6.96)  | 20.95<br>(7.38)  | 20.23<br>(7.80)  | 19.52<br>(8.23)  | 18.84<br>(8.66)  | 18.17<br>(9.08)  | 17.51<br>(9.49)  | 16.86<br>(9.90)  |
| Female locals(≥60y)                                                                        | 37.42<br>(5.31)  | 36.69<br>(5.74)  | 36.29<br>(6.06)  | 35.87<br>(6.46)  | 35.46<br>(6.95)  | 35.04<br>(7.5)   | 34.61<br>(8.12)  | 34.19<br>(8.79)  | 33.77<br>(9.51)  | 33.34<br>(10.27) |
| Male immigrants >10(≥60y)                                                                  | 84.17<br>(3.55)  | 82.72<br>(4.09)  | 82.16<br>(4.95)  | 81.64<br>(5.97)  | 81.19<br>(7.12)  | 80.81<br>(8.39)  | 80.47<br>(9.77)  | 80.15<br>(11.24) | 79.85<br>(12.81) | 79.56<br>(14.45) |
| Male immigrants ≤ 10(≥60y)                                                                 | 43.25<br>(11.07) | 44.93<br>(13.09) | 45.62<br>(14.52) | 46.30<br>(16.09) | 46.96<br>(17.80) | 47.61<br>(19.64) | 48.25<br>(21.62) | 48.88<br>(23.73) | 49.51<br>(25.97) | 50.13<br>(28.34) |
| Male locals(≥60y)                                                                          | 55.79<br>(6.86)  | 54.89<br>(7.65)  | 53.75<br>(8.03)  | 52.63<br>(8.52)  | 51.54<br>(9.12)  | 50.47<br>(9.8)   | 49.43<br>(10.55) | 48.42<br>(11.37) | 47.42<br>(12.25) | 46.44<br>(13.16) |

**eTable 2.** Predictive means and standard deviations (in brackets) of age-standardized mortality rates of colon cancer per 100,000 population for each gender, age group (less than, greater or equal to 60 years old) and immigrant status from 2022 to 2030. Reported means and standard deviations (in brackets) of age-standardized mortality rates in 2021 are also listed.

| Predictive mean of age-standardized mortality rates of liver cancer per 100,000 population |                  |                  |                  |                  |                   |                   |                   |                   |                   |                   |
|--------------------------------------------------------------------------------------------|------------------|------------------|------------------|------------------|-------------------|-------------------|-------------------|-------------------|-------------------|-------------------|
| Year                                                                                       | 2021             | 2022             | 2023             | 2024             | 2025              | 2026              | 2027              | 2028              | 2029              | 2030              |
| Female immigrants >10                                                                      | 11.34<br>(0.66)  | 10.68<br>(0.71)  | 10.09<br>(0.85)  | 9.54<br>(1.01)   | 9.01<br>(1.16)    | 8.50<br>(1.31)    | 8.02(1.45)        | 7.57(1.59)        | 7.14(1.72)        | 6.74(1.83)        |
| Female immigrants ≤10                                                                      | 9.15<br>(1.55)   | 8.66<br>(1.82)   | 8.38<br>(1.95)   | 8.11<br>(2.08)   | 7.84<br>(2.22)    | 7.58<br>(2.36)    | 7.32(2.49)        | 7.07(2.63)        | 6.82(2.76)        | 6.58(2.88)        |
| Female locals                                                                              | 6.72<br>(0.69)   | 6.36<br>(0.88)   | 6.08<br>(0.90)   | 5.81<br>(0.93)   | 5.53<br>(0.97)    | 5.26<br>(1.01)    | 5.01(1.06)        | 4.77(1.11)        | 4.53(1.15)        | 4.3(1.21)         |
| Male immigrants >10                                                                        | 52.17<br>(1.78)  | 49.22<br>(2.36)  | 47.76<br>(2.93)  | 46.35<br>(3.59)  | 45.01<br>(4.31)   | 43.67<br>(5.05)   | 42.37<br>(5.81)   | 41.1(6.56)        | 39.89<br>(7.33)   | 38.71<br>(8.08)   |
| Male immigrants ≤10                                                                        | 42.33<br>(5.87)  | 39.03<br>(6.49)  | 37.39<br>(7.47)  | 35.81<br>(8.51)  | 34.26<br>(9.58)   | 32.76<br>(10.63)  | 31.31<br>(11.65)  | 29.91<br>(12.62)  | 28.56<br>(13.54)  | 27.25<br>(14.40)  |
| Male locals                                                                                | 24.22<br>(1.77)  | 22.16<br>(2.09)  | 21.02<br>(2.22)  | 19.91<br>(2.39)  | 18.85<br>(2.58)   | 17.83<br>(2.79)   | 16.85<br>(3.03)   | 15.92<br>(3.21)   | 15.03<br>(3.40)   | 14.18<br>(3.59)   |
| Female immigrants >10(<60y)                                                                | 3.62<br>(0.45)   | 3.39<br>(0.52)   | 3.29<br>(0.57)   | 3.20<br>(0.63)   | 3.12<br>(0.69)    | 3.04<br>(0.75)    | 2.96(0.82)        | 2.89(0.89)        | 2.82(0.96)        | 2.75(1.03)        |
| Female immigrants ≤10(<60y)                                                                | 4.10<br>(0.79)   | 3.81<br>(0.91)   | 3.69<br>(0.96)   | 3.57<br>(1.02)   | 3.46<br>(1.08)    | 3.36<br>(1.15)    | 3.25(1.22)        | 3.15(1.29)        | 3.06(1.36)        | 2.97(1.43)        |
| Female locals(<60y)                                                                        | 1.50<br>(0.13)   | 1.37<br>(0.2)    | 1.29<br>(0.21)   | 1.22<br>(0.23)   | 1.16<br>(0.24)    | 1.10<br>(0.26)    | 1.04(0.27)        | 0.99(0.29)        | 0.94(0.30)        | 0.89(0.31)        |
| Male immigrants >10(<60y)                                                                  | 26.32<br>(2.11)  | 24.04<br>(2.35)  | 23.02<br>(2.63)  | 22.05<br>(2.94)  | 21.13<br>(3.27)   | 20.25<br>(3.61)   | 19.41<br>(3.95)   | 18.62<br>(4.30)   | 17.86<br>(4.64)   | 17.14<br>(4.98)   |
| Male immigrants ≤10(<60y)                                                                  | 25.52<br>(2.99)  | 22.56<br>(3.96)  | 21.71<br>(4.44)  | 20.87<br>(4.94)  | 20.04<br>(5.45)   | 19.22<br>(5.95)   | 18.42<br>(6.45)   | 17.63<br>(6.91)   | 16.86<br>(7.36)   | 16.11<br>(7.78)   |
| Male locals(<60y)                                                                          | 8.25<br>(0.69)   | 7.47<br>(0.74)   | 6.97<br>(0.79)   | 6.52<br>(0.86)   | 6.11<br>(0.93)    | 5.73<br>(1.01)    | 5.38(1.08)        | 5.04(1.15)        | 4.73(1.21)        | 4.44(1.27)        |
| Female immigrants >10(≥60y)                                                                | 33.67<br>(1.88)  | 29.63<br>(2.01)  | 27.99<br>(2.36)  | 26.42<br>(2.75)  | 24.92<br>(3.14)   | 23.49<br>(3.52)   | 22.13<br>(3.88)   | 20.85<br>(4.23)   | 19.64<br>(4.55)   | 18.50<br>(4.85)   |
| Female immigrants ≤10(≥60y)                                                                | 21.72<br>(5.11)  | 19.08<br>(5.81)  | 18.38<br>(6.14)  | 17.71<br>(6.48)  | 17.03<br>(6.83)   | 16.39<br>(7.16)   | 15.76<br>(7.49)   | 15.16<br>(7.80)   | 14.57<br>(8.11)   | 14.01<br>(8.39)   |
| Female locals(≥60y)                                                                        | 20.63<br>(3.03)  | 18.41<br>(3.23)  | 17.55<br>(3.26)  | 16.72<br>(3.32)  | 15.91<br>(3.40)   | 15.11<br>(3.49)   | 14.34<br>(3.59)   | 13.59<br>(3.69)   | 12.87<br>(3.81)   | 12.17<br>(3.93)   |
| Male immigrants >10(≥60y)                                                                  | 115.39<br>(4.54) | 113.96<br>(5.95) | 113.43<br>(7.65) | 113.17<br>(9.70) | 113.16<br>(12.04) | 113.37<br>(14.66) | 113.79<br>(17.56) | 114.39<br>(20.73) | 115.19<br>(24.18) | 116.17<br>(27.91) |
| Male immigrants ≤10(≥60y)                                                                  | 88.61<br>(15.58) | 85.14<br>(18.85) | 82.59<br>(20.6)  | 80.02<br>(22.44) | 77.42<br>(24.34)  | 74.83<br>(26.24)  | 72.23<br>(28.12)  | 69.64<br>(29.94)  | 67.07<br>(31.70)  | 64.52<br>(33.38)  |
| Male locals(≥60y)                                                                          | 62.88<br>(5.97)  | 58.95<br>(7.91)  | 56.51<br>(8.20)  | 54.14<br>(8.61)  | 51.84<br>(9.12)   | 49.61<br>(9.70)   | 47.46<br>(10.33)  | 45.38<br>(11.01)  | 43.38<br>(11.68)  | 41.45<br>(12.36)  |

**eTable 3.** Predictive means and standard deviations (in brackets) of age-standardized mortality rates of liver cancer per 100,000 population for each gender, age group (less than, greater or equal to 60 years old) and immigrant status from 2022 to 2030. Reported means and standard deviations (in brackets) of age-standardized mortality rates in 2021 are also listed.

| Predictive mean of age-standardized mortality rates of pancreatic cancer per 100,000 population |                 |                 |                 |                  |                  |                  |                  |                  |                  |                  |
|-------------------------------------------------------------------------------------------------|-----------------|-----------------|-----------------|------------------|------------------|------------------|------------------|------------------|------------------|------------------|
| Year                                                                                            | 2021            | 2022            | 2023            | 2024             | 2025             | 2026             | 2027             | 2028             | 2029             | 2030             |
| Female immigrants >10                                                                           | 10.89<br>(0.62) | 11.11<br>(0.75) | 11.36<br>(0.91) | 11.61<br>(1.09)  | 11.87<br>(1.31)  | 12.14<br>(1.56)  | 12.42<br>(1.84)  | 12.71<br>(2.15)  | 13.01<br>(2.48)  | 13.3(2.85)       |
| Female immigrants ≤ 10                                                                          | 5.51<br>(1.44)  | 5.44<br>(1.56)  | 5.44<br>(1.69)  | 5.43(1.84)       | 5.42(1.99)       | 5.41(2.15)       | 5.39(2.32)       | 5.36(2.49)       | 5.34(2.66)       | 5.31(2.84)       |
| Female locals                                                                                   | 8.79<br>(1.10)  | 9.01<br>(1.22)  | 9.15<br>(1.34)  | 9.29(1.48)       | 9.43(1.64)       | 9.57(1.83)       | 9.71(2.05)       | 9.85(2.28)       | 9.99(2.54)       | 10.14<br>(2.83)  |
| Male immigrants >10                                                                             | 16.30<br>(0.98) | 17.87<br>(1.19) | 18.48<br>(1.49) | 19.11<br>(1.87)  | 19.78<br>(2.32)  | 20.47<br>(2.83)  | 21.18<br>(3.42)  | 21.92<br>(4.07)  | 22.69<br>(4.81)  | 23.49<br>(5.61)  |
| Male immigrants ≤ 10                                                                            | 8.10<br>(2.02)  | 7.87<br>(2.37)  | 7.76<br>(2.53)  | 7.64(2.70)       | 7.51(2.87)       | 7.38(3.05)       | 7.24(3.23)       | 7.09(3.41)       | 6.95(3.58)       | 6.81(3.75)       |
| Male locals                                                                                     | 11.97<br>(1.26) | 12.29<br>(1.49) | 12.49<br>(1.64) | 12.69<br>(1.83)  | 12.91<br>(2.06)  | 13.11<br>(2.33)  | 13.33<br>(2.63)  | 13.55<br>(2.97)  | 13.78<br>(3.34)  | 14.02<br>(3.74)  |
| Female immigrants >10(<60y)                                                                     | 3.47<br>(0.33)  | 3.62<br>(0.57)  | 3.74<br>(0.66)  | 3.87(0.77)       | 4.01(0.89)       | 4.14(1.02)       | 4.28(1.18)       | 4.42(1.34)       | 4.57(1.53)       | 4.72(1.73)       |
| Female immigrants ≤ 10(<60y)                                                                    | 1.12<br>(0.33)  | 1.21<br>(0.48)  | 1.22<br>(0.52)  | 1.23(0.56)       | 1.24(0.61)       | 1.25(0.66)       | 1.26(0.71)       | 1.26(0.77)       | 1.27(0.83)       | 1.28(0.89)       |
| Female locals(<60y)                                                                             | 2.76<br>(0.27)  | 2.88<br>(0.36)  | 2.91<br>(0.41)  | 2.93(0.48)       | 2.96(0.55)       | 2.99(0.63)       | 3.02(0.71)       | 3.04(0.81)       | 3.07(0.90)       | 3.10(1.01)       |
| Male immigrants >10(<60y)                                                                       | 6.88<br>(0.98)  | 7.05<br>(1.11)  | 7.24<br>(1.32)  | 7.43(1.56)       | 7.62(1.84)       | 7.82(2.16)       | 8.01(2.50)       | 8.21(2.88)       | 8.40(3.30)       | 8.61(3.75)       |
| Male immigrants ≤ 10(<60y)                                                                      | 2.20<br>(0.71)  | 2.01<br>(0.85)  | 1.95<br>(0.91)  | 1.9(0.94)        | 1.84(0.99)       | 1.79(1.04)       | 1.74(1.09)       | 1.69(1.14)       | 1.64(1.19)       | 1.60(1.24)       |
| Male locals(<60y)                                                                               | 4.16<br>(0.35)  | 4.33<br>(0.48)  | 4.41<br>(0.57)  | 4.46(0.68)       | 4.53(0.81)       | 4.61(0.94)       | 4.69(1.09)       | 4.77(1.26)       | 4.85(1.44)       | 4.93(1.63)       |
| Female immigrants >10(≥60y)                                                                     | 28.58<br>(1.83) | 29.45<br>(2.11) | 29.91<br>(2.54) | 30.38<br>(3.06)  | 30.85<br>(3.66)  | 31.33<br>(4.33)  | 31.81<br>(5.08)  | 32.29<br>(5.91)  | 32.78<br>(6.79)  | 33.27<br>(7.74)  |
| Female immigrants ≤ 10(≥60y)                                                                    | 16.79<br>(5.29) | 15.65<br>(6.08) | 15.49<br>(6.71) | 15.33<br>(7.36)  | 15.16<br>(8.03)  | 14.97<br>(8.73)  | 14.79<br>(9.43)  | 14.59<br>(10.14) | 14.39<br>(10.86) | 14.19<br>(11.58) |
| Female locals(≥60y)                                                                             | 22.80<br>(4.23) | 23.85<br>(4.46) | 24.21<br>(4.81) | 24.56<br>(5.23)  | 24.91<br>(5.73)  | 25.25<br>(6.30)  | 25.58<br>(6.95)  | 25.90<br>(7.67)  | 26.22<br>(8.47)  | 26.54<br>(9.34)  |
| Male immigrants >10(≥60y)                                                                       | 42.70<br>(2.55) | 44.36<br>(3.02) | 45.85<br>(3.76) | 47.41<br>(4.69)  | 49.04<br>(5.78)  | 50.73<br>(7.05)  | 52.48<br>(8.50)  | 54.28<br>(10.13) | 56.16<br>(11.95) | 58.11<br>(13.98) |
| Male immigrants ≤ 10(≥60y)                                                                      | 24.68<br>(8.21) | 23.96<br>(9.01) | 23.87<br>(9.74) | 23.75<br>(10.52) | 23.61<br>(11.33) | 23.45<br>(12.17) | 23.28<br>(13.04) | 23.09<br>(13.93) | 22.89<br>(14.83) | 22.68<br>(15.75) |
| Male locals(≥60y)                                                                               | 30.10<br>(4.68) | 31.17<br>(5.22) | 31.55<br>(5.63) | 31.93<br>(6.14)  | 32.30<br>(6.75)  | 32.66<br>(7.45)  | 33.01<br>(8.23)  | 33.35<br>(9.11)  | 33.69<br>(10.08) | 34.03<br>(11.12) |

**eTable 4.** Predictive means and standard deviations (in brackets) of age-standardized mortality rates of pancreatic cancer per 100,000 population for each gender, age group (less than, greater or equal to 60 years old) and immigrant status from 2022 to 2030. Reported means and standard deviations (in brackets) of age-standardized mortality rates in 2021 are also listed.

| Predictive mean of age-standardized mortality rates of stomach cancer per 100,000 population |                  |                  |                  |                  |                  |                  |                  |                  |                  |                  |
|----------------------------------------------------------------------------------------------|------------------|------------------|------------------|------------------|------------------|------------------|------------------|------------------|------------------|------------------|
| Year                                                                                         | 2021             | 2022             | 2023             | 2024             | 2025             | 2026             | 2027             | 2028             | 2029             | 2030             |
| Female immigrants >10                                                                        | 8.20<br>(0.55)   | 7.95<br>(0.62)   | 7.71<br>(0.74)   | 7.47<br>(0.87)   | 7.25<br>(1.01)   | 7.03<br>(1.15)   | 6.83<br>(1.29)   | 6.62<br>(1.43)   | 6.43<br>(1.57)   | 6.24<br>(1.71)   |
| Female immigrants ≤ 10                                                                       | 7.51<br>(1.44)   | 7.36<br>(1.56)   | 7.33<br>(1.69)   | 7.30<br>(1.85)   | 7.28<br>(2.01)   | 7.27<br>(2.20)   | 7.27<br>(2.40)   | 7.28<br>(2.61)   | 7.31<br>(2.84)   | 7.33<br>(3.09)   |
| Female locals                                                                                | 5.26<br>(0.40)   | 4.91<br>(0.52)   | 4.75<br>(0.57)   | 4.61<br>(0.63)   | 4.47<br>(0.71)   | 4.34<br>(0.77)   | 4.21<br>(0.84)   | 4.08<br>(0.91)   | 3.95<br>(0.99)   | 3.83<br>(1.06)   |
| Male immigrants >10                                                                          | 15.22<br>(0.64)  | 13.89<br>(0.97)  | 13.34(1.21)      | 12.81<br>(1.46)  | 12.31<br>(1.73)  | 11.83<br>(1.99)  | 11.38<br>(2.26)  | 10.95<br>(2.51)  | 10.54<br>(2.76)  | 10.15<br>(3.01)  |
| Male immigrants ≤10                                                                          | 15.83<br>(3.04)  | 15.21<br>(3.38)  | 15.07<br>(3.67)  | 14.93<br>(3.98)  | 14.79<br>(4.31)  | 14.64<br>(4.65)  | 14.51<br>(5.02)  | 14.35<br>(5.39)  | 14.19<br>(5.78)  | 14.03<br>(6.17)  |
| Male locals                                                                                  | 8.14<br>(0.89)   | 8.07<br>(0.99)   | 7.73<br>(1.03)   | 7.41(1.07)       | 7.10<br>(1.13)   | 6.81<br>(1.19)   | 6.51<br>(1.26)   | 6.23<br>(1.33)   | 5.97<br>(1.39)   | 5.71<br>(1.46)   |
| Female immigrants >10(<60y)                                                                  | 4.81<br>(0.56)   | 4.69<br>(0.79)   | 4.62<br>(0.87)   | 4.55<br>(0.96)   | 4.47<br>(1.07)   | 4.39<br>(1.17)   | 4.31<br>(1.29)   | 4.22<br>(1.41)   | 4.13<br>(1.52)   | 4.03<br>(1.64)   |
| Female immigrants ≤ 10(<60y)                                                                 | 3.89<br>(0.80)   | 4.08<br>(0.93)   | 4.10<br>(1.03)   | 4.13<br>(1.14)   | 4.17<br>(1.27)   | 4.21<br>(1.41)   | 4.24<br>(1.55)   | 4.28<br>(1.70)   | 4.32<br>(1.87)   | 4.36<br>(2.05)   |
| Female locals(<60y)                                                                          | 2.28<br>(0.21)   | 2.08<br>(0.27)   | 1.98<br>(0.29)   | 1.88<br>(0.32)   | 1.79<br>(0.35)   | 1.71<br>(0.37)   | 1.61<br>(0.41)   | 1.53<br>(0.43)   | 1.44<br>(0.45)   | 1.37<br>(0.47)   |
| Male immigrants >10(<60y)                                                                    | 4.94<br>(0.57)   | 4.71<br>(0.79)   | 4.55<br>(0.89)   | 4.41<br>(0.99)   | 4.25<br>(1.10)   | 4.12<br>(1.21)   | 3.98<br>(1.32)   | 3.86<br>(1.43)   | 3.74<br>(1.54)   | 3.63<br>(1.65)   |
| Male immigrants ≤ 10(<60y)                                                                   | 4.81<br>(1.31)   | 4.70<br>(1.42)   | 4.66<br>(1.55)   | 4.63<br>(1.69)   | 4.59<br>(1.83)   | 4.55<br>(1.99)   | 4.52<br>(2.15)   | 4.48<br>(2.32)   | 4.44<br>(2.50)   | 4.41<br>(2.68)   |
| Male locals(<60y)                                                                            | 2.48<br>(0.21)   | 2.37<br>(0.29)   | 2.28<br>(0.32)   | 2.21<br>(0.35)   | 2.12<br>(0.38)   | 2.04<br>(0.42)   | 1.97<br>(0.45)   | 1.91<br>(0.49)   | 1.83<br>(0.52)   | 1.77(0.55)       |
| Female immigrants >10(≥60y)                                                                  | 17.80<br>(1.04)  | 16.23<br>(1.26)  | 15.65<br>(1.47)  | 15.08<br>(1.70)  | 14.55<br>(1.94)  | 14.03<br>(2.18)  | 13.54<br>(2.43)  | 13.07<br>(2.68)  | 12.62<br>(2.92)  | 12.19<br>(3.16)  |
| Female immigrants ≤ 10(≥60y)                                                                 | 14.72<br>(4.29)  | 13.01<br>(4.83)  | 12.52<br>(5.11)  | 12.03<br>(5.37)  | 11.55<br>(5.63)  | 11.08<br>(5.88)  | 10.63<br>(6.12)  | 10.19<br>(6.35)  | 9.76(6.56)       | 9.34<br>(6.75)   |
| Female locals(≥60y)                                                                          | 12.20<br>(1.66)  | 11.86<br>(1.84)  | 11.67<br>(1.98)  | 11.49<br>(2.15)  | 11.33<br>(2.35)  | 11.18<br>(2.58)  | 11.04<br>(2.84)  | 10.91<br>(3.11)  | 10.79(3.4)       | 10.68<br>(3.71)  |
| Male immigrants >10(≥ 60y)                                                                   | 37.23<br>(2.29)  | 36.59<br>(2.56)  | 35.17(3.18)      | 33.82<br>(3.86)  | 32.55<br>(4.57)  | 31.34<br>(5.28)  | 30.19<br>(6.01)  | 29.08<br>(6.70)  | 28.02<br>(7.40)  | 27.01<br>(8.07)  |
| Male immigrants ≤ 10(≥60y)                                                                   | 42.30<br>(10.88) | 41.43<br>(11.78) | 41.03<br>(12.71) | 40.61<br>(13.70) | 40.17<br>(14.75) | 39.71<br>(15.85) | 39.24<br>(16.99) | 38.75<br>(18.16) | 38.23<br>(19.35) | 37.71<br>(20.57) |
| Male locals(≥60y)                                                                            | 23.04<br>(3.29)  | 22.69<br>(3.56)  | 22.37(4.07)      | 22.16(4.84)      | 21.89<br>(5.86)  | 21.61<br>(7.22)  | 21.52<br>(9.02)  | 21.74<br>(11.29) | 22.17<br>(14.03) | 22.73<br>(17.28) |

**eTable 5.** Predictive means and standard deviations (in brackets) of age-standardized mortality rates of stomach cancer per 100,000 population for each gender, age group (less than, greater or equal to 60 years old) and immigrant status from 2022 to 2030. Reported means and standard deviations (in brackets) of age-standardized mortality rates in 2021 are also listed.

| Predictive mean of age-standardized mortality rates of prostate cancer per 100,000 population |                 |                 |                  |                 |                  |                  |                  |                  |                  |                 |
|-----------------------------------------------------------------------------------------------|-----------------|-----------------|------------------|-----------------|------------------|------------------|------------------|------------------|------------------|-----------------|
| Year                                                                                          | 2021            | 2022            | 2023             | 2024            | 2025             | 2026             | 2027             | 2028             | 2029             | 2030            |
| Male immigrants >10                                                                           | 14.81<br>(0.61) | 14.59<br>(0.79) | 14.57<br>(0.96)  | 14.56<br>(1.15) | 14.54<br>(1.37)  | 14.51<br>(1.61)  | 14.48<br>(1.86)  | 14.45<br>(2.13)  | 14.42<br>(2.42)  | 14.38<br>(2.72) |
| Male immigrants ≤10                                                                           | 9.03<br>(2.95)  | 8.78<br>(3.11)  | 8.58<br>(3.29)   | 8.39<br>(3.49)  | 8.19(3.69)       | 8.10(3.89)       | 7.82(4.11)       | 7.63(4.31)       | 7.45(4.51)       | 7.27(4.72)      |
| Male locals                                                                                   | 9.54<br>(1.40)  | 9.66<br>(1.57)  | 9.67<br>(1.66)   | 9.69<br>(1.77)  | 9.72(1.91)       | 9.75(2.06)       | 9.78(2.23)       | 9.82(2.43)       | 9.86(2.64)       | 9.9(2.88)       |
| Male immigrants >10(<60y)                                                                     | 0.57<br>(0.12)  | 0.52<br>(0.17)  | 0.51<br>(0.19)   | 0.50<br>(0.21)  | 0.49(0.22)       | 0.48(0.24)       | 0.47(0.25)       | 0.46(0.27)       | 0.45(0.29)       | 0.44(0.31)      |
| Male immigrants ≤10(<60y)                                                                     | 0.65<br>(0.59)  | 0.73<br>(0.77)  | 0.81<br>(0.93)   | 0.87<br>(1.10)  | 0.94(1.31)       | 1.01(1.51)       | 1.09(1.75)       | 1.16(2.02)       | 1.24(2.32)       | 1.33(2.64)      |
| Male locals(<60y)                                                                             | 0.63<br>(0.12)  | 0.66<br>(0.14)  | 0.66<br>(0.16)   | 0.66<br>(0.19)  | 0.67(0.21)       | 0.67(0.24)       | 0.67(0.27)       | 0.68(0.31)       | 0.68(0.33)       | 0.69(0.37)      |
| Male immigrants >10(≥60y)                                                                     | 49.43<br>(2.59) | 49.61<br>(2.73) | 49.63<br>(3.29)  | 49.64<br>(3.94) | 49.64<br>(4.68)  | 49.64<br>(5.51)  | 49.63<br>(6.38)  | 49.62<br>(7.32)  | 49.61<br>(8.32)  | 49.58(9.37)     |
| Male immigrants ≤10(≥60y)                                                                     | 28.29<br>(9.15) | 27.66<br>(9.78) | 26.53<br>(10.21) | 25.4<br>(10.63) | 24.28<br>(11.03) | 23.16<br>(11.41) | 22.07<br>(11.76) | 21.01<br>(12.09) | 19.96<br>(12.38) | 18.95(12.63)    |
| Male locals(≥60y)                                                                             | 31.57<br>(5.17) | 31.48<br>(5.49) | 31.40<br>(5.76)  | 31.32<br>(6.09) | 31.24<br>(6.48)  | 31.15<br>(6.94)  | 31.06<br>(7.44)  | 30.96<br>(8.01)  | 30.86<br>(8.61)  | 30.74(9.26)     |

**eTable 6.** Predictive means and standard deviations (in brackets) of age-standardized mortality rates of prostate cancer per 100,000 population for each age group (less than, greater or equal to 60 years old) and immigrant status from 2022 to 2030. Reported means and standard deviations (in brackets) of age-standardized mortality rates in 2021 are also listed.



# Reporting checklist for cohort study.

Based on the STROBE cohort guidelines.

## Instructions to authors

Complete this checklist by entering the page numbers from your manuscript where readers will find each of the items listed below.

Your article may not currently address all the items on the checklist. Please modify your text to include the missing information. If you are certain that an item does not apply, please write "n/a" and provide a short explanation.

Upload your completed checklist as an extra file when you submit to a journal.

In your methods section, say that you used the STROBE cohort reporting guidelines, and cite them as:

von Elm E, Altman DG, Egger M, Pocock SJ, Gøtzsche PC, Vandenbroucke JP. The Strengthening of Reporting of Observational Studies in Epidemiology (STROBE) Statement: guidelines for reporting observational studies.

|                           |                     | Reporting Item                                                                                  | Page Number |
|---------------------------|---------------------|-------------------------------------------------------------------------------------------------|-------------|
| <b>Title and abstract</b> |                     |                                                                                                 |             |
| Title                     | <a href="#">#1a</a> | Indicate the study's design with a commonly used term in the title or the abstract              | 1           |
| Abstract                  | <a href="#">#1b</a> | Provide in the abstract an informative and balanced summary of what was done and what was found | 2           |
| <b>Introduction</b>       |                     |                                                                                                 |             |
| Background / rationale    | <a href="#">#2</a>  | Explain the scientific background and rationale for the investigation being reported            | 4           |
| Objectives                | <a href="#">#3</a>  | State specific objectives, including any prespecified hypotheses                                | 4           |
| <b>Methods</b>            |                     |                                                                                                 |             |
| Study design              | <a href="#">#4</a>  | Present key elements of study design early in the paper                                         | 5           |
| Setting                   | <a href="#">#5</a>  | Describe the setting, locations, and relevant dates, including periods                          | 5           |

|    |                      |                      |                                                                                                                                                                                                                                                                      |     |
|----|----------------------|----------------------|----------------------------------------------------------------------------------------------------------------------------------------------------------------------------------------------------------------------------------------------------------------------|-----|
| 1  |                      |                      | of recruitment, exposure, follow-up, and data collection                                                                                                                                                                                                             |     |
| 2  |                      |                      |                                                                                                                                                                                                                                                                      |     |
| 3  | Eligibility criteria | <a href="#">#6a</a>  | Give the eligibility criteria, and the sources and methods of selection of participants. Describe methods of follow-up.                                                                                                                                              | 5   |
| 4  |                      |                      |                                                                                                                                                                                                                                                                      |     |
| 5  |                      |                      |                                                                                                                                                                                                                                                                      |     |
| 6  | Eligibility criteria | <a href="#">#6b</a>  | For matched studies, give matching criteria and number of exposed and unexposed                                                                                                                                                                                      | n/a |
| 7  |                      |                      |                                                                                                                                                                                                                                                                      |     |
| 8  |                      |                      |                                                                                                                                                                                                                                                                      |     |
| 9  |                      |                      |                                                                                                                                                                                                                                                                      |     |
| 10 | Variables            | <a href="#">#7</a>   | Clearly define all outcomes, exposures, predictors, potential confounders, and effect modifiers. Give diagnostic criteria, if applicable                                                                                                                             | 5   |
| 11 |                      |                      |                                                                                                                                                                                                                                                                      |     |
| 12 |                      |                      |                                                                                                                                                                                                                                                                      |     |
| 13 |                      |                      |                                                                                                                                                                                                                                                                      |     |
| 14 |                      |                      |                                                                                                                                                                                                                                                                      |     |
| 15 | Data sources /       | <a href="#">#8</a>   | For each variable of interest give sources of data and details of methods of assessment (measurement). Describe comparability of assessment methods if there is more than one group. Give information separately for for exposed and unexposed groups if applicable. | 5   |
| 16 | measurement          |                      |                                                                                                                                                                                                                                                                      |     |
| 17 |                      |                      |                                                                                                                                                                                                                                                                      |     |
| 18 |                      |                      |                                                                                                                                                                                                                                                                      |     |
| 19 |                      |                      |                                                                                                                                                                                                                                                                      |     |
| 20 |                      |                      |                                                                                                                                                                                                                                                                      |     |
| 21 |                      |                      |                                                                                                                                                                                                                                                                      |     |
| 22 | Bias                 | <a href="#">#9</a>   | Describe any efforts to address potential sources of bias                                                                                                                                                                                                            | 5   |
| 23 |                      |                      |                                                                                                                                                                                                                                                                      |     |
| 24 | Study size           | <a href="#">#10</a>  | Explain how the study size was arrived at                                                                                                                                                                                                                            | 5   |
| 25 |                      |                      |                                                                                                                                                                                                                                                                      |     |
| 26 |                      |                      |                                                                                                                                                                                                                                                                      |     |
| 27 | Quantitative         | <a href="#">#11</a>  | Explain how quantitative variables were handled in the analyses. If applicable, describe which groupings were chosen, and why                                                                                                                                        | 5   |
| 28 | variables            |                      |                                                                                                                                                                                                                                                                      |     |
| 29 |                      |                      |                                                                                                                                                                                                                                                                      |     |
| 30 |                      |                      |                                                                                                                                                                                                                                                                      |     |
| 31 | Statistical          | <a href="#">#12a</a> | Describe all statistical methods, including those used to control for confounding                                                                                                                                                                                    |     |
| 32 | methods              |                      |                                                                                                                                                                                                                                                                      |     |
| 33 |                      |                      |                                                                                                                                                                                                                                                                      |     |
| 34 | 5                    |                      |                                                                                                                                                                                                                                                                      |     |
| 35 |                      |                      |                                                                                                                                                                                                                                                                      |     |
| 36 |                      |                      |                                                                                                                                                                                                                                                                      |     |
| 37 | Statistical          | <a href="#">#12b</a> | Describe any methods used to examine subgroups and interactions                                                                                                                                                                                                      | 5   |
| 38 | methods              |                      |                                                                                                                                                                                                                                                                      |     |
| 39 |                      |                      |                                                                                                                                                                                                                                                                      |     |
| 40 |                      |                      |                                                                                                                                                                                                                                                                      |     |
| 41 | Statistical          | <a href="#">#12c</a> | Explain how missing data were addressed                                                                                                                                                                                                                              | 5   |
| 42 | methods              |                      |                                                                                                                                                                                                                                                                      |     |
| 43 |                      |                      |                                                                                                                                                                                                                                                                      |     |
| 44 | Statistical          | <a href="#">#12d</a> | If applicable, explain how loss to follow-up was addressed                                                                                                                                                                                                           | n/a |
| 45 | methods              |                      |                                                                                                                                                                                                                                                                      |     |
| 46 |                      |                      |                                                                                                                                                                                                                                                                      |     |
| 47 |                      |                      |                                                                                                                                                                                                                                                                      |     |
| 48 | Statistical          | <a href="#">#12e</a> | Describe any sensitivity analyses                                                                                                                                                                                                                                    |     |
| 49 | methods              |                      |                                                                                                                                                                                                                                                                      |     |
| 50 |                      |                      |                                                                                                                                                                                                                                                                      |     |
| 51 |                      |                      |                                                                                                                                                                                                                                                                      |     |
| 52 | n/a                  |                      |                                                                                                                                                                                                                                                                      |     |
| 53 |                      |                      |                                                                                                                                                                                                                                                                      |     |
| 54 | <b>Results</b>       |                      |                                                                                                                                                                                                                                                                      |     |
| 55 |                      |                      |                                                                                                                                                                                                                                                                      |     |
| 56 |                      |                      |                                                                                                                                                                                                                                                                      |     |
| 57 | Participants         | <a href="#">#13a</a> | Report numbers of individuals at each stage of study—eg numbers potentially eligible, examined for eligibility, confirmed eligible,                                                                                                                                  | n/a |
| 58 |                      |                      |                                                                                                                                                                                                                                                                      |     |
| 59 |                      |                      |                                                                                                                                                                                                                                                                      |     |
| 60 |                      |                      |                                                                                                                                                                                                                                                                      |     |

included in the study, completing follow-up, and analysed. Give information separately for for exposed and unexposed groups if applicable.

|    |                  |                      |                                                                            |
|----|------------------|----------------------|----------------------------------------------------------------------------|
| 1  |                  |                      |                                                                            |
| 2  |                  |                      |                                                                            |
| 3  |                  |                      |                                                                            |
| 4  |                  |                      |                                                                            |
| 5  | Participants     | <a href="#">#13b</a> | Give reasons for non-participation at each stage 5                         |
| 6  |                  |                      |                                                                            |
| 7  | Participants     | <a href="#">#13c</a> | Consider use of a flow diagram                                             |
| 8  |                  |                      |                                                                            |
| 9  | n/a              |                      |                                                                            |
| 10 |                  |                      |                                                                            |
| 11 |                  |                      |                                                                            |
| 12 | Descriptive data | <a href="#">#14a</a> | Give characteristics of study participants (eg demographic, clinical, 5    |
| 13 |                  |                      | social) and information on exposures and potential confounders. Give       |
| 14 |                  |                      | information separately for exposed and unexposed groups if                 |
| 15 |                  |                      | applicable.                                                                |
| 16 |                  |                      |                                                                            |
| 17 |                  |                      |                                                                            |
| 18 |                  |                      |                                                                            |
| 19 | Descriptive data | <a href="#">#14b</a> | Indicate number of participants with missing data for each variable of     |
| 20 |                  |                      | interest                                                                   |
| 21 |                  |                      |                                                                            |
| 22 | n/a              |                      |                                                                            |
| 23 |                  |                      |                                                                            |
| 24 |                  |                      |                                                                            |
| 25 | Descriptive data | <a href="#">#14c</a> | Summarise follow-up time (eg, average and total amount)                    |
| 26 |                  |                      |                                                                            |
| 27 | n/a              |                      |                                                                            |
| 28 |                  |                      |                                                                            |
| 29 |                  |                      |                                                                            |
| 30 | Outcome data     | <a href="#">#15</a>  | Report numbers of outcome events or summary measures over time.            |
| 31 |                  |                      | Give information separately for exposed and unexposed groups if            |
| 32 |                  |                      | applicable.                                                                |
| 33 |                  |                      |                                                                            |
| 34 |                  |                      |                                                                            |
| 35 | n/a              |                      |                                                                            |
| 36 |                  |                      |                                                                            |
| 37 |                  |                      |                                                                            |
| 38 | Main results     | <a href="#">#16a</a> | Give unadjusted estimates and, if applicable, confounder-adjusted 6        |
| 39 |                  |                      | estimates and their precision (eg, 95% confidence interval). Make          |
| 40 |                  |                      | clear which confounders were adjusted for and why they were                |
| 41 |                  |                      | included                                                                   |
| 42 |                  |                      |                                                                            |
| 43 |                  |                      |                                                                            |
| 44 | Main results     | <a href="#">#16b</a> | Report category boundaries when continuous variables were  n/a             |
| 45 |                  |                      | categorized                                                                |
| 46 |                  |                      |                                                                            |
| 47 |                  |                      |                                                                            |
| 48 | Main results     | <a href="#">#16c</a> | If relevant, consider translating estimates of relative risk into absolute |
| 49 |                  |                      | risk for a meaningful time period                                          |
| 50 |                  |                      |                                                                            |
| 51 | n/a              |                      |                                                                            |
| 52 |                  |                      |                                                                            |
| 53 |                  |                      |                                                                            |
| 54 | Other analyses   | <a href="#">#17</a>  | Report other analyses done—eg analyses of subgroups and 7                  |
| 55 |                  |                      | interactions, and sensitivity analyses                                     |
| 56 |                  |                      |                                                                            |
| 57 |                  |                      |                                                                            |

## Discussion

|    |                    |                     |                                                                          |    |
|----|--------------------|---------------------|--------------------------------------------------------------------------|----|
| 1  | Key results        | <a href="#">#18</a> | Summarise key results with reference to study objectives                 | 8  |
| 2  |                    |                     |                                                                          |    |
| 3  | Limitations        | <a href="#">#19</a> | Discuss limitations of the study, taking into account sources of         | 10 |
| 4  |                    |                     | potential bias or imprecision. Discuss both direction and magnitude of   |    |
| 5  |                    |                     | any potential bias.                                                      |    |
| 6  |                    |                     |                                                                          |    |
| 7  |                    |                     |                                                                          |    |
| 8  | Interpretation     | <a href="#">#20</a> | Give a cautious overall interpretation considering objectives,           | 8  |
| 9  |                    |                     | limitations, multiplicity of analyses, results from similar studies, and |    |
| 10 |                    |                     | other relevant evidence.                                                 |    |
| 11 |                    |                     |                                                                          |    |
| 12 |                    |                     |                                                                          |    |
| 13 | Generalisability   | <a href="#">#21</a> | Discuss the generalisability (external validity) of the study results    | 9  |
| 14 |                    |                     |                                                                          |    |
| 15 |                    |                     |                                                                          |    |
| 16 | <b>Other</b>       |                     |                                                                          |    |
| 17 | <b>Information</b> |                     |                                                                          |    |
| 18 |                    |                     |                                                                          |    |
| 19 |                    |                     |                                                                          |    |
| 20 | Funding            | <a href="#">#22</a> | Give the source of funding and the role of the funders for the present   | 11 |
| 21 |                    |                     | study and, if applicable, for the original study on which the present    |    |
| 22 |                    |                     | article is based                                                         |    |
| 23 |                    |                     |                                                                          |    |
| 24 |                    |                     |                                                                          |    |

The STROBE checklist is distributed under the terms of the Creative Commons Attribution License CC-BY. This checklist was completed on 11. February 2023 using <https://www.goodreports.org/>, a tool made by the [EQUATOR Network](#) in collaboration with [Penelope.ai](#)

# BMJ Open

## An age-period-cohort analysis and projection of cancer mortality in Hong Kong, 1998–2030

|                                 |                                                                                                                                                                                                                                                                                                                                                                                                                                                                                         |
|---------------------------------|-----------------------------------------------------------------------------------------------------------------------------------------------------------------------------------------------------------------------------------------------------------------------------------------------------------------------------------------------------------------------------------------------------------------------------------------------------------------------------------------|
| Journal:                        | <i>BMJ Open</i>                                                                                                                                                                                                                                                                                                                                                                                                                                                                         |
| Manuscript ID                   | bmjopen-2023-072751.R4                                                                                                                                                                                                                                                                                                                                                                                                                                                                  |
| Article Type:                   | Original research                                                                                                                                                                                                                                                                                                                                                                                                                                                                       |
| Date Submitted by the Author:   | 05-Sep-2023                                                                                                                                                                                                                                                                                                                                                                                                                                                                             |
| Complete List of Authors:       | Zhao, Yanji; The Hong Kong Polytechnic University, Department of Applied Mathematics<br>Zhuang, Zian; The Hong Kong Polytechnic University, Department of Applied Mathematics; University of California Los Angeles, Department of Biostatistics<br>Yang, Lin; The Hong Kong Polytechnic University, School of Nursing<br>He, Daihai; The Hong Kong Polytechnic University, Department of Applied Mathematics; The Hong Kong Polytechnic University, Research Institute for Future Food |
| <b>Primary Subject Heading</b>: | Research methods                                                                                                                                                                                                                                                                                                                                                                                                                                                                        |
| Secondary Subject Heading:      | Public health, Oncology                                                                                                                                                                                                                                                                                                                                                                                                                                                                 |
| Keywords:                       | STATISTICS & RESEARCH METHODS, ONCOLOGY, Risk Factors                                                                                                                                                                                                                                                                                                                                                                                                                                   |
|                                 |                                                                                                                                                                                                                                                                                                                                                                                                                                                                                         |

SCHOLARONE™  
Manuscripts



I, the Submitting Author has the right to grant and does grant on behalf of all authors of the Work (as defined in the below author licence), an exclusive licence and/or a non-exclusive licence for contributions from authors who are: i) UK Crown employees; ii) where BMJ has agreed a CC-BY licence shall apply, and/or iii) in accordance with the terms applicable for US Federal Government officers or employees acting as part of their official duties; on a worldwide, perpetual, irrevocable, royalty-free basis to BMJ Publishing Group Ltd ("BMJ") its licensees and where the relevant Journal is co-owned by BMJ to the co-owners of the Journal, to publish the Work in this journal and any other BMJ products and to exploit all rights, as set out in our [licence](#).

The Submitting Author accepts and understands that any supply made under these terms is made by BMJ to the Submitting Author unless you are acting as an employee on behalf of your employer or a postgraduate student of an affiliated institution which is paying any applicable article publishing charge ("APC") for Open Access articles. Where the Submitting Author wishes to make the Work available on an Open Access basis (and intends to pay the relevant APC), the terms of reuse of such Open Access shall be governed by a Creative Commons licence – details of these licences and which [Creative Commons](#) licence will apply to this Work are set out in our licence referred to above.

Other than as permitted in any relevant BMJ Author's Self Archiving Policies, I confirm this Work has not been accepted for publication elsewhere, is not being considered for publication elsewhere and does not duplicate material already published. I confirm all authors consent to publication of this Work and authorise the granting of this licence.

# An age-period-cohort analysis and projection of cancer mortality in Hong Kong, 1998–2030

Yanji Zhao<sup>1, #</sup>, Zian Zhuang<sup>1,2, #</sup>, Lin Yang<sup>3</sup> and Daihai He<sup>1,4\*</sup>

1 Department of Applied Mathematics, Hong Kong Polytechnic University, Hong Kong, China

2 Department of Biostatistics, University of California, Los Angeles, CA, United States

3 School of Nursing, Hong Kong Polytechnic University, Hong Kong, China

4 Research Institute for Future Food, Hong Kong Polytechnic University, Hong Kong, China

# These authors contributed equally to this work.

\*Correspondence to:

Daihai He

Department of Applied Mathematics, The Hong Kong Polytechnic University, Hong Kong, China

Tel: 852-27667864

Email: daihai.he@polyu.edu.hk

*Word count: 3326*

## 23 Abstract

24 **Objectives:** To explore the relationship between immigration groups and cancer mortality, this  
25 study aimed to explore age, period, birth cohort effects and effects across genders and  
26 immigration groups on mortality rates of lung, pancreatic, colon, liver, prostate and stomach  
27 cancers and their projections.

29 **Design, setting, and participants:** Death registry data in Hong Kong between 1998 and 2021,  
30 which were stratified by age, sex and immigration status. Immigration status was classified into  
31 three groups: locals born in Hong Kong, long-stay immigrants and short-stay immigrants.

33 **Methods:** Age-period-cohort analysis was used to examine age, period, and birth cohort effects  
34 for genders and immigration groups from 1998 to 2021. Bayesian age-period-cohort models  
35 were applied to predict the mortality rates from 2022 to 2030.

37 **Results:** Short-stay immigrants revealed pronounced fluctuations of mortality rates by age and  
38 of relative risks by cohort and period effects for six types of cancers than those of long-stay  
39 immigrants and locals. Immigrants for each type of cancer and gender will be at a higher  
40 mortality risk than locals. After 2021, decreasing trends ( $p<0.05$ ) or plateau ( $p>0.05$ ) of  
41 forecasting mortality rates of cancers occur for all immigration groups, except for increasing  
42 trends for short-stay male immigrants with colon cancer ( $p<0.05$ , Avg +0.30 deaths/100,000  
43 per annum from 15.47 to 18.50 deaths/100,000) and long-stay male immigrants with pancreatic  
44 cancer ( $p<0.05$ , Avg +0.72 deaths/100,000 per annum from 16.30 to 23.49 deaths/100,000),.

46 **Conclusions:** Findings underscore the effect of gender and immigration status in Hong Kong  
47 on mortality risks of cancers that immigrants for each type of cancer and gender will be at a  
48 higher mortality risk than locals.

50 **Keywords:** Age-period-cohort analysis, immigration, mortality, lung cancer, pancreatic cancer,  
51 colon cancer, liver cancer, prostate cancer, stomach cancer



1  
2  
3  
4  
5  
6  
7  
8  
9  
10  
11  
12  
13  
14  
15  
16  
17  
18  
19  
20  
21  
22  
23  
24  
25  
26  
27  
28  
29  
30  
31  
32  
33  
34  
35  
36  
37  
38  
39  
40  
41  
42  
43  
44  
45  
46  
47  
48  
49  
50  
51  
52  
53  
54  
55  
56  
57  
58  
59  
60

## 52 **Strengths and limitations of this study**

53

54 • This study provides new evidence regarding the relationship between immigration status  
55 and cancer mortality, given the effects of age, period, birth cohort and their predictions.

56

57 • The non-identifiability problem has not been interpreted in age-period-cohort models.

58

59 • The future perspective of cancer therapies and techniques have not been considered.

For peer review only

## 61 **Introduction**

62 Several migration waves from mainland China to Hong Kong have occurred over the past  
63 century. These migration waves included a large-scale migration inflow from 1945 to 1950 (the  
64 Chinese Civil War) and a few small-scale inflows in the 1950s, 1970s, and 1990s [1-3]. In 2016,  
65 immigrants from mainland China formed approximately 38% of the population of Hong Kong.  
66 These inflows have led to a growing interest in research on the disparity of health conditions  
67 between the locals and immigrants.

68  
69 Cancer has been one of the most common causes of death, as an estimated 19.3 million new  
70 cancer cases and 9.9 million new cancer-associated deaths occurred worldwide in 2020 [4]. In  
71 Hong Kong, lung cancer is one of the most common causes of cancer deaths [5, 6]. Previous  
72 studies suggested that the primary cause of lung cancer is cigarette smoking [7-11]. Genetic  
73 factors, asbestos, radon gas, second-hand smoke, and other forms of air pollution have been  
74 proven to influence the risk of lung cancer [12-18]. The overall daily smoking rate in mainland  
75 China was approximately 23.2% in 2018 [19], whereas the daily smoking rate in Hong Kong  
76 was only 10.2% in 2019 [20]. The leading causes of liver cancer include viral infection,  
77 drinking of alcohol and polluted water and food supplies which are also culprits for colon,  
78 stomach and pancreatic cancer [21]. Alcohol consumption per capita in Hong Kong has reached  
79 2.37 liters in 2021 [22], compared to 7.0 liters of per capita consumption of alcohol in mainland  
80 China in 2018 [23]. As approximately 99% of prostate cancer cases occur after age 50, factors  
81 of prostate cancer have been regarded as old age, race, family history and the diet of red meat  
82 consumption [24]. In addition to these risk factors, studies have suggested that cancer mortality  
83 rates vary depending on migrant status [25-28]. According to data from the Census and  
84 Statistics Department of Hong Kong, approximately 81% of immigrants in Hong Kong  
85 immigrated from mainland China, Macau, and Taiwan. Immigrants from mainland China  
86 account for the bulk of this population. Previous studies have shown that child immigrants in  
87 Hong Kong tend to suffer from a higher risk of wheezing disorders and cardiovascular diseases,  
88 and immigrant women have higher age-specific mortality rates of breast cancer than locally-  
89 born women in Hong Kong [29, 30]. However, to date, few studies have investigated the effect  
90 of length of stay in Hong Kong and birthplace on the risk of other types of cancer.

91  
92 In this study, we compared the mortality rates of lung, pancreatic, colon, liver, prostate and  
93 stomach cancers between locally born residents in Hong Kong and immigrants from mainland  
94 China. Both populations are widely considered as ethnically homogeneous with similar cultures.  
95 Nevertheless, due to different early life experiences, immigrants are exposed to more various  
96 social economy and lifestyles than locals. Therefore, it's constructive to ascertain whether  
97 immigrants from mainland China have a different mortality pattern of cancers from locals to  
98 verify the significance of migration status for this health outcome. As age-period-cohort (APC)

1  
2  
3 99 analysis plays a vital role in studying time-specific phenomena in epidemiology, in this study,  
4 100 to evaluate the effect of immigration on cancer mortality in the past and future, we developed  
5 101 APC models specified by sex and migrant status to assess the effects of age, period, birth cohort,  
6 102 and of the length of stay in Hong Kong on the mortality risks of cancers. Additionally, we  
7 103 explore the projection of mortality rates for the locally born population and immigrants in Hong  
8 104 Kong who were younger or older than 60 using a predictive model, taking into account age,  
9 105 period, and birth cohort effects as well.  
10  
11  
12  
13  
14  
15

## 16 107 **Methods**

### 17 108 *Data*

18 109 We obtained the death registry data in Hong Kong between 1998 and 2021 from the Census  
19 110 and Statistics Department of Hong Kong, as the data in 2022 has not been available up to now.  
20 111 The data was extracted from a routine census held by the Hong Kong government as subjective  
21 112 errors caused by resampling can be neglected. The population data were stratified by age, sex,  
22 113 immigration status, and length of stay in Hong Kong. We retrieved six types of cancer cases  
23 114 from the death registry data using ICD codes, such as ICD-9 code 162 and ICD-10 codes  
24 115 C34.0–C34.3, C348, and C349 for lung cancer. To assure comparability among  
25 116 registries, deaths from the age group of 35–85 years were selected, since cases younger than 35  
26 117 and older than 85 were relatively trivial for lack of statistical interpretability [31]. Immigration  
27 118 status was classified into three groups: locals born in Hong Kong, immigrants who have lived  
28 119 in Hong Kong for >10 years before death defined as long-stay immigrants, and immigrants who  
29 120 have lived in Hong Kong for ≤10 years before death defined as short-stay immigrants. Notably,  
30 121 much focus was placed on immigrants from mainland China, because approximately 81% of  
31 122 immigrants in Hong Kong came from mainland China, Macau, and Taiwan based on the data  
32 123 from the Census and Statistics Department of Hong Kong. Moreover, few cases recorded from  
33 124 Macau and Taiwan are statistically insignificant in the analysis. Demographics and population  
34 125 projections from 2022 to 2030 were retrieved from the Census and Statistics Department of  
35 126 Hong Kong and estimated with cubic smoothing spline as the prerequisite of the predictive  
36 127 model. Codes for APC and BAPC analysis are available in the GitHub repository  
37 128 (<https://github.com/kshz2164313/APC-population-projections-for-immigration-HK>).  
38  
39  
40  
41  
42  
43  
44  
45  
46  
47  
48  
49  
50  
51

### 52 131 *Statistical analysis*

53 132 We modeled cancer mortality rates in Hong Kong using APC analysis based on log-linear  
54 133 Poisson regression models. The model aimed to disentangle age, period, and cohort effects of  
55 134 time-varying phenomena simultaneously [32, 33], given that

$$56 135 \log(E_{ij}) = \alpha_i + \beta_j + \gamma_k + \mu + \log(\theta_{ij}) \quad (1)$$

1  
2  
3 136 where  $E_{ij}$  denotes expected mortality;  $\alpha_i$ ,  $\beta_j$ , and  $\gamma_k$  denote age, period, and cohort  
4  
5 137 effect, respectively, for  $i = 1, \dots, I$ ,  $j = 1, \dots, J$ ,  $k = 1, \dots, K$  with  $k = I - i + j$ .  
6  
7 138  $\log(\theta_{ij})$  is the offset. We mainly focused on the contributions of sex and immigration status  
8  
9 139 due to the non-identifiability problem that the effects of these three components are collinear  
10  
11 140 with each other (denoted as period – age = cohort) [34]. Birth cohort effect and period effect  
12  
13 141 were assessed with relative risks to evaluate the effect of three components. The median year  
14  
15 142 of birth among cases was regarded as the reference cohort [35,36]. Since death cases aged at  
16  
17 143 35–85 years between 1998 and 2021 were selected, the range of birth cohort from 1913 to  
18  
19 144 1986 covered observations and further projections until 2030. The second and penultimate  
20  
21 145 period effects were constrained to the reference for period. For sex and immigration status,  
22  
23 146 maximum likelihood framework was applied to estimate the relative risks and 95%  
24  
25 147 confidence intervals (CIs) by age groups, calendar period, and birth cohort.  
26  
27 148

28  
29 149 Several projection approaches for future cancer mortality have been developed, but a  
30  
31 150 Bayesian age-period-cohort (BAPC) model built upon integrated nested Laplace  
32  
33 151 approximations (INLA) [37] yields relatively higher coverage and better performance for all  
34  
35 152 evaluated parameter combinations [38]. To prevent some sampling problems caused by  
36  
37 153 Markov chain Monte Carlo (MCMC), this MCMC-free BAPC approach was applied to  
38  
39 154 predict future cancer mortality within a fully Bayesian inference setting and provide outputs  
40  
41 155 of interest simply, such as projected age-standardized and age-specific rates. Convergence  
42  
43 156 checks are not necessary for this technique [37]. The projections of age-standardized cancer  
44  
45 157 mortality rates for each sex, age group (younger or older than 60 years) and migrant status,  
46  
47 158 taking into account age, period, and birth cohort effects, were performed based on the weights  
48  
49 159 of population age groups from the WHO World Standard population [39], with 95%  
50  
51 160 prediction intervals. Mann-Kendall trend test was applied to verify the projection trend.  
52  
53 161 Friedman's Two-Way Analysis of Variance was applied to test interactions between gender  
54  
55 162 and immigration groups for each year.  
56  
57 163

58  
59 164 All analyses were performed via R version 4.2.1 (R Core Team, R Foundation for Statistical  
60  
61 165 Computing, Vienna, Austria, 2013, <http://www.R-project.org/>). The APC models were  
62  
63 166 established using the Epi package, and the projections based on Bayesian APC models were  
64  
65 167 performed with the BAPC package.  
66  
67 168

#### 68 69 Patient and public involvement

70 None.

71

72

## 73 **Results**

74 Figure 1 & 2 and eFigure 1(a-e) in **Supplementary Material** illustrate the estimates of age  
75 (assessed by cancer mortality), cohort and period effects (assessed by relative risk) based on  
76 APC models among three migrant groups for men and women with six types of cancers,

1  
2  
3  
4 177 respectively. All the mortality rates for each gender and immigration status exhibit notable  
5 178 increasing trends with age. Age, cohort and period effects of six types of cancer for immigrants  
6 179 who stayed in Hong Kong for  $\leq 10$  years revealed relatively more pronounced fluctuations and  
7  
8 180 deviations from those effects in the other two immigration groups. Significant increasing trends  
9  
10 181 of age effect occurred in all types of cancer, regardless of gender and immigration status. For  
11 182 example, while relatively insignificant differences in lung cancer mortality rates by  
12 183 immigration status among females have performed, male immigrants who remained in Hong  
13  
14 184 Kong for  $> 10$  years had higher lung cancer mortality rates at ages above 50 years and those  
15 185 who arrived  $\leq 10$  years had lower lung cancer mortality at ages below 62 years compared to  
16  
17 186 local men Figure 1. In addition to compatible dynamics of period effect for locals and long-stay  
18 187 immigrants, similar changes of relative risks by birth cohort for locals and long-stay immigrants  
19  
20 188 in lung, colon, liver and stomach cancers occurred before 1945, whereas significant differences  
21 189 of relative risks by birth cohort between these two immigration groups occurred after 1960  
22  
23 190 (Figure 1 & eFigure 1(a,b,d)). Locals and long-stay immigrants in pancreatic and prostate  
24 191 cancer perform almost similar changes of relative risks by birth cohort effects all the time  
25 192 (eFigure 1(c,e)). Short-stay immigrants who have stayed in Hong Kong for  $\leq 10$  years had more  
26 193 fluctuating relative risks affected by period effects before 2020 than those for locals and long-  
27 194 stay immigrants. Lack of young cases, especially young short-stay immigrants, of prostate  
28  
29 195 cancer leads to significant deviations and variances in age and cohort effects.  
30  
31  
32 196

33 197 Figure 3-5, eFigure 2-6 in **Supplementary Material** illustrate the age-standardized mortality  
34 198 rates of six types of cancer from 1998 to 2021 and their projections by sex, immigrant status  
35 199 and age groups from 2022 to 2030, taking into account age, period, and birth cohort effects.  
36  
37 200 Means and standard deviations of predictive mortality rates are shown in eTable 1-6 in  
38  
39 201 **Supplementary Material**. For all ages projection (Figure 2 & eFigure 2-6), as approximately  
40 202 significant interactions between gender and immigration groups emerge for each type of cancer  
41 203 in each year ( $p < 0.05$ ), given the projected trends, immigrants for each gender, especially who  
42 204 have stayed in Hong Kong for  $> 10$  years will suffer from higher mortality rates of cancer in  
43 205 each year than locals. Monotone decreasing trends or plateau of forecasting occur for both  
44 206 genders and all immigration groups in cancers, except for increasing trends for male immigrants  
45 207 who have stayed in Hong Kong for  $\leq 10$  years with colon cancer ( $p < 0.05$ , Avg +0.30  
46 208 deaths/100,000 per annum) from 15.47 deaths/100,000 (95% CI: 11.28, 19.66) in 2021 to 18.50  
47 209 deaths/100,000 (95% CI: 2.31, 34.69) in 2030, and male immigrants who have stayed in Hong  
48 210 Kong for  $> 10$  years with pancreatic cancer ( $p < 0.05$ , Avg +0.72 deaths/100,000 per annum)  
49 211 from 16.30 deaths/100,000 (95% CI: 14.38, 17.26) in 2021 to 23.49 deaths/100,000 (95% CI:  
50 212 12.49, 34.49) in 2030. Most of predictive trends for younger cases ( $< 60$  years) and older cases  
51  
52  
53 213 ( $\geq 60$  years) reach a consensus with those for all ages population, except for two phenomena:  
54  
55  
56 214 1.) mortality rates of lung cancer for men immigrants  $\leq 10$  that insignificant trend for all ages

1  
2  
3 215 (p > 0.05) vs. decline for younger cases (p < 0.05) vs. increase for older cases (p < 0.05); 2.)  
4 216 mortality rates of liver cancer for men immigrants >10 that decline for all ages (p < 0.05) vs.  
5 217 decline for younger cases (p < 0.05) vs. insignificant trend for older cases (p > 0.05). Some  
6 218 particular cases occur in the projection of prostate cancer that young long-stay male immigrants  
7 219 (0.44 deaths/100,000, 95% CI: 0, 1.05) aged less than 60 will be at lower mortality rate than  
8 220 locals (0.69 deaths/100,000, 95% CI: 0, 1.42) in 2030 (eTable 6). Compared with other cancers  
9 221 and immigration groups, male immigrants who have stayed in Hong Kong for >10 years with  
10 222 lung cancer would perform the most significant decline in predictive mean from 102.90 (95%  
11 223 CI: 98.14, 107.66) to 79.55 (95% CI: 47.46, 111.64) deaths per 100,000 population (Avg -2.34  
12 224 deaths/100,000 per annum) (eTable 1), while the same immigration group with pancreatic  
13 225 cancer would indicate the most significant uptrend in each year of 16.30 (95% CI: 14.38,17.26)  
14 226 and 23.49 (95% CI: 12.49, 34.49) deaths per 100,000 population in 2021 and 2030, respectively  
15 227 (Avg +0.72 deaths/100,000 per annum) (eTable 4).  
16  
17  
18  
19  
20  
21  
22  
23  
24  
25  
26  
27

## 231 Discussion

232 Early detection of cancer is positive and instructive for increasing chances of cure. Nevertheless,  
233 the high mortality rate of cancer results from late diagnosis among most patients after  
234 progression to more advanced or severe stages. Individuals at high risk of cancer, such as  
235 smokers, alcoholics or those who are frequently exposed to susceptible circumstances, should  
236 be screened for early detections to increase opportunities for cure [40]. Therefore, the  
237 differences in mortality rates among immigration groups are synonymous with detection means,  
238 therapies, and social history in disparate periods and areas.  
239

240 While the changes in mortality rates by age for long-stay immigrants reached approximate  
241 harmony with those for locals, the changes in mortality rates by age for short-stay immigrants  
242 revealed clear differences with those for the other two populations. The group of long-stay  
243 immigrants had a higher risk of death from lung, colon and liver cancers than the other two  
244 immigration groups after the age of 60 years. Short-stay male immigrants were less likely to  
245 die from lung cancer before the age of 65 years. The contrast in age effects among the  
246 immigration groups was partially consistent with studies [25, 41] that highlighted the age  
247 effects for locals and immigrants on breast cancer mortality in Hong Kong and lung cancer  
248 incidence in Sweden, as they both showed similar trends and magnitudes between locals and  
249 immigrants before the age of 60 years. They are also compatible with the results in [42] that  
250 diagnosis of liver cancer is the most frequent among populations at 55 to 65 years old.

251 According to these trends, young individuals, especially new young immigrant men, who  
252 have benefited from all-rounded development in mainland China and Hong Kong, are more



253 likely to seek early detection and be treated for cancers using more advanced treatments [43].  
254 Differences in birth cohort effects among immigrant groups partially comply with the  
255 interpretation above.

256  
257 We observed significant trends of cohort effects among locals and immigrants. These findings  
258 are partially consistent but subtly different from previous findings, regarding the effect of  
259 immigration status on cancers. Zhao et al. [25] described multiple peaks of cohort effects on  
260 breast cancer mortality between locals and immigrants in Hong Kong, as well as a significant  
261 decline in cohort effects after 1950. In contrast, Sung et al. [44] investigated the difference in  
262 breast cancer incidence between Chinese Americans and non-Hispanic whites in the U.S. and  
263 emphasized that Chinese Americans were at lower risk of breast cancer than non-Hispanic  
264 whites born in the same year. Here, we interpret the cohort-driven trends resulting from the  
265 intricacy of social history and lifestyle. Compared to a relatively stable social development in  
266 Hong Kong, representing downward trends of relative risks for locals, wars and social  
267 instability in mainland China resulted in several immigration waves from mainland China to  
268 Hong Kong before 1950. Additionally, remarkable increasing trends were recorded for new  
269 immigrants after 1950, which corresponded to the economic downturn after wars and famine  
270 between 1959 and 1961 during their youth [45]. The increasing trends for new immigrants  
271 and similar trends for locals and long-stay immigrants were consistent with the finding that  
272 nutrient deficiency contributes to a higher risk of severe mortality rates of cancers [46].  
273 Furthermore, we speculate that these trends, especially those for locals and long-stay  
274 immigrants, are most likely attributed to social development and personal behaviors, such as  
275 daily habits, occupational history, different diagnoses and treatments, and domestic  
276 environmental exposures. Notably, short-stay immigrants suffered from a lower risk of death  
277 from colon cancer for all ages (eFigure 1a in **Supplementary Material**). As locals and  
278 immigrants in Hong Kong transitioned to more westernized lifestyles, higher consumption of  
279 meat was associated with a higher risk of these types of cancer, whereas consumption of  
280 vegetables had a strong protective effect against pancreatic cancer, and moderate  
281 consumption of coffee appeared to be beneficial against lung cancer [47,48]. Further studies  
282 on potential risk factors are required.

283  
284 Short-stay immigrants had more fluctuating and non-stationary but inconspicuous relative  
285 risks by period effects before 2021 than locals and long-stay immigrants. Cumulatively, an  
286 arch pattern and fluctuating curve depicting period effects externally resulted in an arch  
287 pattern of age-standardized mortality rates for short-stay immigrant women and irregular rates  
288 for short-stay immigrant men before 2021. The external performance of different period  
289 effects on mortality rates could be most likely attributed to the higher effect of different  
290 lifestyles and social development on new immigrants than on long-stay immigrants and locals  
291 in Hong Kong. For the age-standardized mortality rates and projections, consistent with

1  
2  
3  
4 292 previous findings [49,50], we predict that the mortality rates of cancer in Hong Kong after  
5 293 2021 will continue to decline or remain relatively stable, consistent with the trends before  
6 294 2020, except for male immigrants who have stayed in Hong Kong for  $\leq 10$  years with colon  
7  
8 295 cancer and male immigrants who have stayed in Hong Kong for  $>10$  years with pancreatic  
9 296 cancer. Men will be at higher risk of mortality rates of cancer than women, regardless of  
10 297 immigration status. They are also compatible with the results in [4] that men suffer from a  
11 298 higher risk of these types of cancer than women, excluding prostate cancer. Furthermore, new  
12 299 immigrant women will be at lower risk than local women, even though long-stay immigrants  
13 300 will suffer from higher mortality rates than locals in the future. Potential interpretations could  
14 301 be consistent with those for birth cohort effects, as age and period effects are considered as  
15 302 confounders of cohort effect.  
16  
17  
18  
19  
20 303

21 304 In the past few decades, spurred by an increasing burden of high incidence and mortality rates  
22 305 of cancer, several studies focused on the inherent identification dilemma of three effects in the  
23 306 APC model. Further, complicated population distribution and immigration status in Hong  
24 307 Kong, one of the areas with the highest population density and migration frequency in the  
25 308 world, have intricate causes and inherent dynamics of cancer and other diseases. To our  
26 309 knowledge, few studies have assessed the relationship between immigration status and cancer  
27 310 mortality. Therefore, this study is original to examine the effect of the length of stay in Hong  
28 311 Kong and origins of previous residence on cancer deaths, which is instructive for further  
29 312 immigration policy-making and targeted strategies of disease detection and intervention.  
30 313 However, this study had several limitations. Given the non-identifiability problem in age-  
31 314 period-cohort models, we could only depict trends and variations among different  
32 315 immigration and sex groups, as illustrated in figures, and insufficiently perform the estimates  
33 316 of the contributions of three effects or subgroups to mortality rates. Furthermore, we adopted  
34 317 a cubic smoothing spline to estimate populations of immigrants and locals due to the large  
35 318 proportion of unspecified immigration status from official demographic projections. A few  
36 319 acceptable cases resulted in a limited type of cancer so that some common cancers, such as  
37 320 the ovary and cervix, were discarded. Since the issue of quantification, the future perspective  
38 321 of cancer therapies and techniques have not been considered in the model of projection.  
39  
40  
41  
42  
43  
44  
45  
46  
47  
48  
49  
50  
51

## 52 324 **Conclusion**

53 325 We conclude that immigrants, especially short-stay immigrants, had more pronounced  
54 326 fluctuations of mortality rates by age and of relative risks by cohort and period effects for six  
55 327 types of cancers than those of long-stay immigrants and locals. Male immigrants who have  
56 328 stayed in Hong Kong for  $\leq 10$  years with colon cancer and male immigrants who have stayed  
57 329 in Hong Kong for  $>10$  years with pancreatic cancer would perform significant uptrend in the



1  
2  
3  
4 330 future, while other immigration groups for each type of cancer would continue to decline or  
5 331 remain relatively stable. Immigrants for each gender in Hong Kong would suffer from higher  
6 332 mortality risks of cancers than locals in the future.  
7  
8  
9  
10  
11  
12  
13  
14  
15  
16  
17  
18  
19  
20  
21  
22  
23  
24  
25  
26  
27  
28  
29  
30  
31  
32  
33  
34  
35  
36  
37  
38  
39  
40  
41  
42  
43  
44  
45  
46  
47  
48  
49  
50  
51  
52  
53  
54  
55  
56  
57  
58  
59  
60

For peer review only

1  
2  
3  
4  
5  
6  
7  
8  
9  
10  
11  
12  
13  
14  
15  
16  
17  
18  
19  
20  
21  
22  
23  
24  
25  
26  
27  
28  
29  
30  
31  
32  
33  
34  
35  
36  
37  
38  
39  
40  
41  
42  
43  
44  
45  
46  
47  
48  
49  
50  
51  
52  
53  
54  
55  
56  
57  
58  
59  
60

333 **Declaration**

334 **Ethical approval and consent to participate**

335 Ethical approval and consent to participate are not applicable. This study does not directly  
336 involve human participants. Data was obtained from the Census and Statistics Department of  
337 Hong Kong.

338 **Consent for publication**

339 Not applicable.

340 **Data availability statement**

341 Data are available upon reasonable request.

342 **Contributors**

343 Yanji Zhao: Methodology, Formal analysis, Data Curation, Writing - Original Draft,  
344 Visualization. Zian Zhuang: Methodology, Formal analysis, Data Curation, Writing - Review  
345 & Editing. Lin Yang: Validation, Writing - Review & Editing. Daihai He: Conceptualization,  
346 Writing - Review & Editing, Supervision

347  
348 **Funding**

349 The work described in this paper was partially supported by a grant from the Research Grants  
350 Council of the Hong Kong Special Administrative Region, China (HKU C7123-20G).

351 **Competing interests**

352 None declared.

## References

1. Fan S-C. The population projection of Hong Kong. *Southeast Asian Journal of Social Science*. 1974;2(1/2):105-17.
2. Department CaS. Hong Kong Statistics 1947-1967 (Report). [https://www.statistics.gov.hk/pub/hist/1961\\_1970/B10100031967AN67E0100.pdf](https://www.statistics.gov.hk/pub/hist/1961_1970/B10100031967AN67E0100.pdf) Accessed 4th May 2019.
3. Department CaS. Demographic Trends in Hong Kong 1981-2011 (Report). <http://www.statistics.gov.hk/pub/B1120017032012XXXXB0100.pdf>, Accessed 4th May 2019.
4. Sung H, Ferlay J, Siegel RL, Laversanne M, Soerjomataram I, Jemal A, et al. Global Cancer Statistics 2020: GLOBOCAN Estimates of Incidence and Mortality Worldwide for 36 Cancers in 185 Countries. *CA: A Cancer Journal for Clinicians*. 2021 2021/05/01;71(3):209-49. doi: <https://doi.org/10.3322/caac.21660>.
5. Wang XR, Chiu YL, Qiu H, Au JSK, Yu ITS. The roles of smoking and cooking emissions in lung cancer risk among Chinese women in Hong Kong. *Annals of Oncology*. 2009 2009/04/01;20(4):746-51. doi: <https://doi.org/10.1093/annonc/mdn699>.
6. Chiu Y-L, Wang X-R, Qiu H, Yu IT-S. Risk factors for lung cancer: a case-control study in Hong Kong women. *Cancer Causes & Control*. 2010 2010/05/01;21(5):777-85. doi: 10.1007/s10552-010-9506-9.
7. Office on S, Health. Publications and Reports of the Surgeon General. Women and Smoking: A Report of the Surgeon General. Atlanta (GA): Centers for Disease Control and Prevention (US); 2001.
8. Escobedo LG, Peddicord JP. Smoking prevalence in US birth cohorts: the influence of gender and education. *American Journal of Public Health*. 1996 1996/02/01;86(2):231-6. doi: 10.2105/AJPH.86.2.231.
9. Husten CG, Shelton DM, Chrismon JH, Lin YC, Mowery P, Powell FA. Cigarette smoking and smoking cessation among older adults: United States, 1965-94. *Tobacco Control*. 1997;6(3):175. doi: 10.1136/tc.6.3.175.
10. Bolego C, Poli A, Paoletti R. Smoking and gender. *Cardiovascular Research*. 2002;53(3):568-76. doi: 10.1016/S0008-6363(01)00520-X.
11. Doll R, Hill AB. The mortality of doctors in relation to their smoking habits; a preliminary report. *Br Med J*. 1954;1(4877):1451-5. PMID: 13160495. doi: 10.1136/bmj.1.4877.1451.
12. Ramada Rodilla JM, Calvo Cerrada B, Serra Pujadas C, Delclos GL, Benavides FG. Fiber burden and asbestos-related diseases: an umbrella review. *Gaceta Sanitaria*. 2021 2021/06/11/. doi: <https://doi.org/10.1016/j.gaceta.2021.04.001>.
13. Collishaw NE, Kirkbride J, Wigle DT. Tobacco smoke in the workplace: an occupational health hazard. *Can Med Assoc J*. 1984;131(10):1199-204. PMID: 6498670.
14. Dresler CM, Fratelli C, Babb J, Everley L, Evans AA, Clapper ML. Gender differences in genetic susceptibility for lung cancer. *Lung Cancer*. 2000 2000/12/01;30(3):153-60. doi: [https://doi.org/10.1016/S0169-5002\(00\)00163-X](https://doi.org/10.1016/S0169-5002(00)00163-X).
15. Alexandrov K, Cascorbi I, Rojas M, Bouvier G, Kriek E, Bartsch H. CYP1A1 and GSTM1 genotypes affect benzo[ a ]pyrene DNA adducts in smokers' lung: comparison with aromatic/hydrophobic adduct formation. *Carcinogenesis*. 2002;23(12):1969-77. doi:

- 1  
2  
3 397 10.1093/carcin/23.12.1969.
- 4 398 16. Samet JM. Radon and Lung Cancer. JNCI: Journal of the National Cancer Institute.  
5 399 1989;81(10):745-58. doi: 10.1093/jnci/81.10.745.
- 6 400 17. Darby S, Hill D, Auvinen A, Barros-Dios JM, Baysson H, Bochicchio F, et al. Radon in  
7 401 homes and risk of lung cancer: collaborative analysis of individual data from 13 European case-  
8 402 control studies. BMJ. 2005;330(7485):223. doi: 10.1136/bmj.38308.477650.63.
- 9 403 18. Raaschou-Nielsen O, Andersen ZJ, Beelen R, Samoli E, Stafoggia M, Weinmayr G, et al.  
10 404 Air pollution and lung cancer incidence in 17 European cohorts: prospective analyses from the  
11 405 European Study of Cohorts for Air Pollution Effects (ESCAPE). The Lancet Oncology. 2013  
12 406 2013/08/01/;14(9):813-22. doi: [https://doi.org/10.1016/S1470-2045\(13\)70279-1](https://doi.org/10.1016/S1470-2045(13)70279-1).
- 13 407 19. 2018 Summary-20190719. Retrieved August 26, 2022, from  
14 408 [https://www.who.int/docs/default-source/wpro---documents/countries/china/2018-gats-china-](https://www.who.int/docs/default-source/wpro---documents/countries/china/2018-gats-china-factsheet-cn-en.pdf?sfvrsn=3f4e2da9_2)  
15 409 [factsheet-cn-en.pdf?sfvrsn=3f4e2da9\\_2](https://www.who.int/docs/default-source/wpro---documents/countries/china/2018-gats-china-factsheet-cn-en.pdf?sfvrsn=3f4e2da9_2)
- 16 410 20. *Thematic household survey*. Retrieved August 26, 2022, from  
17 411 [https://www.censtatd.gov.hk/en/data/stat\\_report/product/B1130201/att/B11302702020XXXX](https://www.censtatd.gov.hk/en/data/stat_report/product/B1130201/att/B11302702020XXXX)  
18 412 [B0100.pdf](https://www.censtatd.gov.hk/en/data/stat_report/product/B1130201/att/B11302702020XXXX)
- 19 413 21. Abubakar II, Tillmann T, Banerjee A. Global, regional, and national age-sex specific all-  
20 414 cause and cause-specific mortality for 240 causes of death, 1990-2013: a systematic analysis  
21 415 for the Global Burden of Disease Study 2013. Lancet. 2015 Jan 10;385(9963):117-71.
- 22 416 22. Estimated alcohol consumption per capita in Hong Kong. Change4Health. (n.d.).  
23 417 Retrieved December 1, 2022, from  
24 418 [https://www.change4health.gov.hk/en/alcohol\\_aware/figures/alcohol\\_consumption/index.htm](https://www.change4health.gov.hk/en/alcohol_aware/figures/alcohol_consumption/index.htm)  
25 419 1
- 26 420 23. World Health Organization. Global status report on alcohol and health 2018. World  
27 421 Health Organization; 2019 Feb 14.
- 28 422 24. Wild C. World cancer report 2014. Wild CP, Stewart BW, editors. Geneva, Switzerland:  
29 423 World Health Organization; 2014.
- 30 424 25. Zhao S, Dong H, Qin J, Liu H, Li Y, Chen Y, et al. Breast cancer mortality in Chinese  
31 425 women: does migrant status play a role? Annals of Epidemiology. 2019 2019/12/01/;40:28-  
32 426 34.e2. doi: <https://doi.org/10.1016/j.annepidem.2019.10.006>.
- 33 427 26. Gomez SL, Yang J, Lin S-W, McCusker M, Sandler A, Cheng I, et al. Incidence trends of  
34 428 lung cancer by immigration status among Chinese Americans. Cancer Epidemiol Biomarkers  
35 429 Prev. 2015;24(8):1157-64. PMID: 25990553. doi: 10.1158/1055-9965.EPI-15-0123.
- 36 430 27. Hemminki K, Li X, Czene K. Cancer risks in first-generation immigrants to Sweden.  
37 431 International Journal of Cancer. 2002 2002/05/10;99(2):218-28. doi:  
38 432 <https://doi.org/10.1002/ijc.10322>.
- 39 433 28. Vanthomme K, Roskamp M, De Schutter H, Vandenheede H. Lung cancer incidence  
40 434 differences in migrant men in Belgium, 2004–2013: histology-specific analyses. BMC Cancer.  
41 435 2021 2021/03/30;21(1):328. doi: 10.1186/s12885-021-08038-6.
- 42 436 29. Schooling M, Leung GM, Janus ED, Ho SY, Hedley AJ, Lam TH. Childhood migration  
43 437 and cardiovascular risk. International Journal of Epidemiology. 2004;33(6):1219-26. doi:  
44 438 10.1093/ije/dyh221.
- 45 439 30. Leung JYY, Li AM, Leung GM, Schooling CM. Mode of delivery and childhood  
46 440 hospitalizations for asthma and other wheezing disorders. Clinical & Experimental Allergy.

- 1  
2  
3 441 2015 2015/06/01;45(6):1109-17. doi: <https://doi.org/10.1111/cea.12548>.
- 4 442 31. Baker A, Bray I. Bayesian projections: what are the effects of excluding data from younger  
5 443 age groups?. *American Journal of Epidemiology*. 2005 Oct 15;162(8):798-805.
- 6 444 32. Rosenberg PS, Anderson WF. Age-Period-Cohort Models in Cancer Surveillance Research:  
7 445 Ready for Prime Time? APC Models. *Cancer Epidemiology, Biomarkers & Prevention*. 2011  
8 446 Jul 1;20(7):1263-8.
- 9 447 33. Holford T. Analyzing the effects of age, period and cohort on incidence and mortality rates.  
10 448 *Stat Meth Med Res*. 1992;1:317-37.
- 11 449 34. Brookmeyer R, Stroup DF, editors. *Monitoring the health of populations: statistical*  
12 450 *principles and methods for public health surveillance*. Oxford University Press; 2004.
- 13 451 35. Yang Y, Land KC. *Age-period-cohort analysis: New models, methods, and empirical*  
14 452 *applications*. Taylor & Francis; 2013.
- 15 453 36. Robertson C, Gandini S, Boyle P. Age-period-cohort models: a comparative study of  
16 454 available methodologies. *Journal of clinical epidemiology*. 1999 Jun 1;52(6):569-83.
- 17 455 37. Riebler A, Held L. Projecting the future burden of cancer: Bayesian age-period-cohort  
18 456 analysis with integrated nested Laplace approximations. *Biometrical Journal*. 2017  
19 457 May;59(3):531-49.
- 20 458 38. Knoll M, Furkel J, Debus J, Abdollahi A, Karch A, Stock C. An R package for an integrated  
21 459 evaluation of statistical approaches to cancer incidence projection. *BMC medical research*  
22 460 *methodology*. 2020 Dec;20(1):1-1.
- 23 461 39. Ahmad OB, Boschi-Pinto C, Lopez AD, Murray CJ, Lozano R, Inoue M. *Age*  
24 462 *standardization of rates: a new WHO standard*. Geneva: World Health Organization. 2001  
25 463 Jan;9(10):1-4.
- 26 464 40. Sung H, Ferlay J, Siegel RL, Laversanne M, Soerjomataram I, Jemal A, Bray F. *Global*  
27 465 *cancer statistics 2020: GLOBOCAN estimates of incidence and mortality worldwide for 36*  
28 466 *cancers in 185 countries*. CA: a cancer journal for clinicians. 2021 May;71(3):209-49.
- 29 467 41. Mousavi SM, Fallah M, Sundquist K, Hemminki K. Age-and time-dependent changes in  
30 468 cancer incidence among immigrants to Sweden: colorectal, lung, breast and prostate cancers.  
31 469 *International journal of cancer*. 2012 Jul 15;131(2):E122-8.
- 32 470 42. National Cancer Institute. *SEER stat fact sheets: liver and intrahepatic bile duct cancer*.
- 33 471 43. Wu X, Chung VC, Hui EP, Ziea ET, Ng BF, Ho RS, Tsoi KK, Wong S, Wu JC.  
34 472 *Effectiveness of acupuncture and related therapies for palliative care of cancer: overview of*  
35 473 *systematic reviews*. *Scientific reports*. 2015 Nov 26;5(1):1-5.
- 36 474 44. Sung H, Rosenberg PS, Chen WQ, Hartman M, Lim WY, Chia KS, Wai-Kong Mang O,  
37 475 Tse L, Anderson WF, Yang XR. The impact of breast cancer-specific birth cohort effects among  
38 476 younger and older Chinese populations. *International journal of cancer*. 2016 Aug  
39 477 1;139(3):527-34.
- 40 478 45. *The world economy volume 1: a millennial perspective, 2, Historical statistics*: Academic  
41 479 *Foundation, Gurgaon, India (2007)*
- 42 480 46. Elias SG, Peeters PH, Grobbee DE, van Noord PA. The 1944-1945 Dutch famine and  
43 481 subsequent overall cancer incidence. *Cancer Epidemiology Biomarkers & Prevention*. 2005  
44 482 Aug;14(8):1981-5.
- 45 483 47. Chiu YL, Wang XR, Qiu H, Yu IT. Risk factors for lung cancer: a case-control study in  
46 484 Hong Kong women. *Cancer Causes & Control*. 2010 May;21(5):777-85.

- 1  
2  
3 485 48. Li J, Lam AS, Yau ST, Yiu KK, Tsoi KK. Antihypertensive treatments and risks of lung  
4 486 Cancer: A large population-based cohort study in Hong Kong. *BMC cancer*. 2021 Dec;21(1):1-  
5 487 9.  
6  
7 488 49. Du J, Sun H, Sun Y, Du J, Cao W, Sun S. Assessment of age, period, and cohort effects of  
8 489 lung cancer incidence in Hong Kong and projection up to 2030 based on changing  
9 490 demographics. *American Journal of Cancer Research*. 2021;11(12):5902.  
10  
11 491 50. *Centre for Health Protection, Department of Health - Lung Cancer*. Centre for Health  
12 492 Protection. Retrieved August 10, 2022, from  
13 493 <https://www.chp.gov.hk/en/healthtopics/content/25/49.html>

14  
15  
16  
17  
18  
19  
20  
21  
22  
23  
24  
25  
26  
27  
28  
29  
30  
31  
32  
33  
34  
35  
36  
37  
38  
39  
40  
41  
42  
43  
44  
45  
46  
47  
48  
49  
50  
51  
52  
53  
54  
55  
56  
57  
58  
59  
60

For peer review only

**FIGURE LEGENDS**

**Figure 1.** Parameter estimates of age (a), cohort (b) and period (c) effects based on an age-period-cohort model of male lung cancer mortality rates by immigrant groups: locals, immigrants stay in Hong Kong for more than 10 years and immigrants stay in Hong Kong for less than or equal to 10 years. Age effect was assessed by mortality (left axis). Cohort and period effects were assessed by relative risk (right axis), 95% confidence intervals are shown as shaded bands.

**Figure 2.** Parameter estimates of age (a), cohort (b) and period (c) effects based on an age-period-cohort model of female lung cancer mortality rates by immigrant groups: locals, immigrants stay in Hong Kong for more than 10 years and immigrants stay in Hong Kong for less than or equal to 10 years. Age effect was assessed by mortality (left axis). Cohort and period effects were assessed by relative risk (right axis), 95% confidence intervals are shown as shaded bands.

**Figure 3.** Projections of lung cancer mortality rates by gender and immigrant status from 2022 to 2030. Observations are shown as dots with the predictive distribution between the 5% and 95% quantile, whereby each lighter shade of red represents an additional 10% predictive CI. The predictive mean is shown as black solid line and the vertical dashed line indicates where prediction started.

**Figure 4.** Projections of lung cancer mortality rates for the population younger than 60 by gender and immigrant status from 2022 to 2030. Observations are shown as dots with the predictive distribution between the 5% and 95% quantile, whereby each lighter shade of red represents an additional 10% predictive CI. The predictive mean is shown as black solid line and the vertical dashed line indicates where prediction started.

**Figure 5.** Projections of lung cancer mortality rates for the population older than or equal to 60 by gender and immigrant status from 2022 to 2030. Observations are shown as dots with the predictive distribution between the 5% and 95% quantile, whereby each lighter shade of red represents an additional 10% predictive CI. The predictive mean is shown as black solid line and the vertical dashed line indicates where prediction started.





Figure 1. Parameter estimates of age (a), cohort (b) and period (c) effects based on an age-period-cohort model of male lung cancer mortality rates by immigrant groups: locals, immigrants stay in Hong Kong for more than 10 years and immigrants stay in Hong Kong for less than or equal to 10 years. Age effect was assessed by mortality (left axis). Cohort and period effects were assessed by relative risk (right axis), 95% confidence intervals are shown as shaded bands.

533x343mm (57 x 57 DPI)



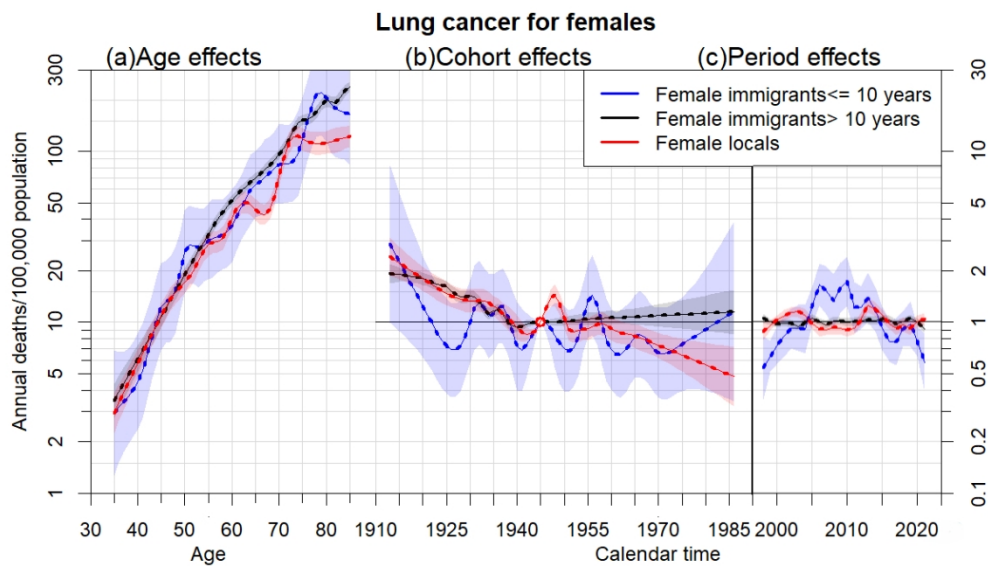

Figure 2. Parameter estimates of age (a), cohort (b) and period (c) effects based on an age-period-cohort model of female lung cancer mortality rates by immigrant groups: locals, immigrants stay in Hong Kong for more than 10 years and immigrants stay in Hong Kong for less than or equal to 10 years. Age effect was assessed by mortality (left axis). Cohort and period effects were assessed by relative risk (right axis), 95% confidence intervals are shown as shaded bands.

533x343mm (57 x 57 DPI)

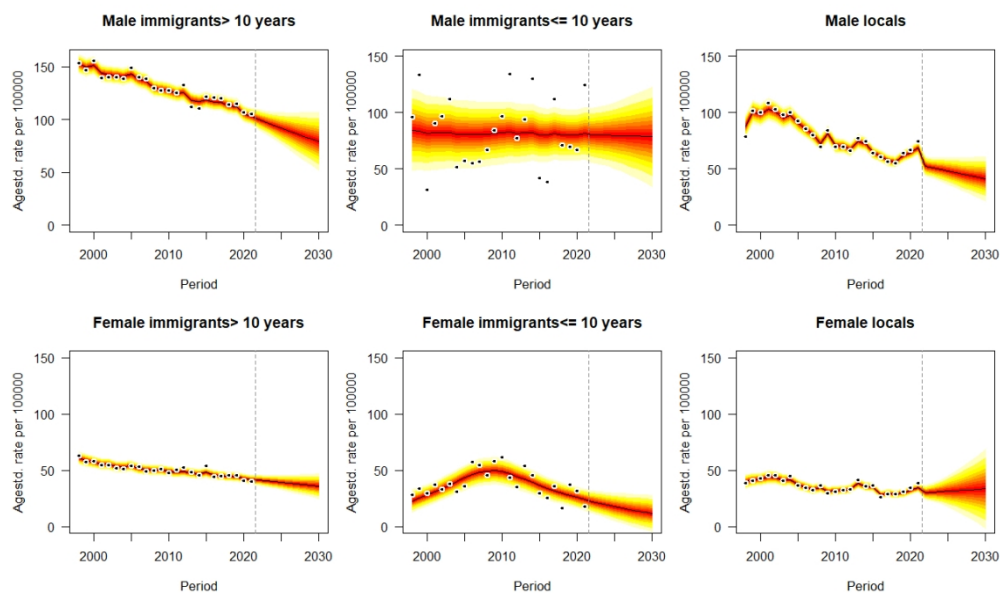

Figure 3. Projections of lung cancer mortality rates by gender and immigrant status from 2022 to 2030. Observations are shown as dots with the predictive distribution between the 5% and 95% quantile, whereby each lighter shade of red represents an additional 10% predictive CI. The predictive mean is shown as black solid line and the vertical dashed line indicates where prediction started.

570x343mm (57 x 57 DPI)

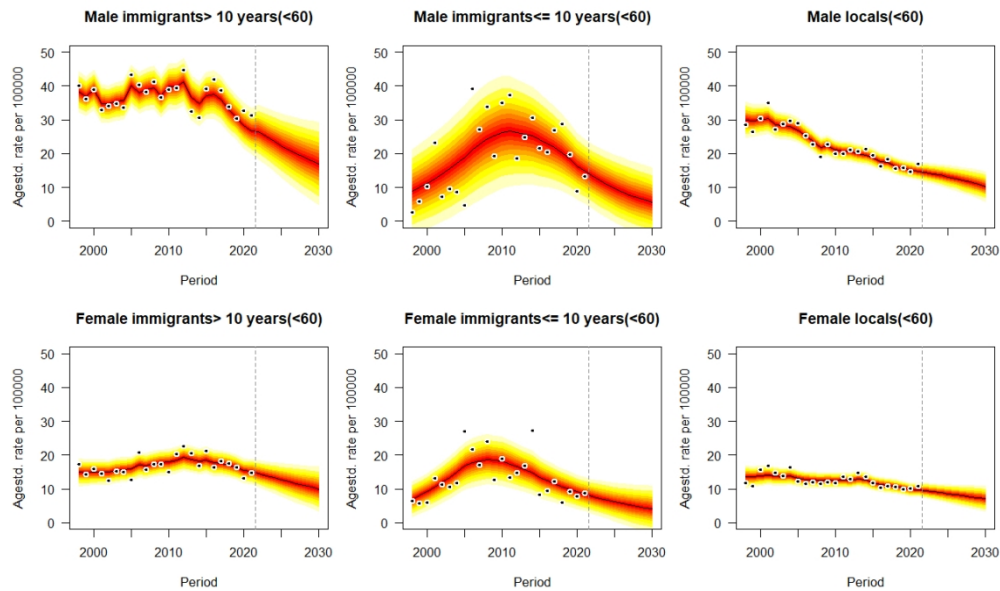

Figure 4. Projections of lung cancer mortality rates for the population younger than 60 by gender and immigrant status from 2022 to 2030. Observations are shown as dots with the predictive distribution between the 5% and 95% quantile, whereby each lighter shade of red represents an additional 10% predictive CI. The predictive mean is shown as black solid line and the vertical dashed line indicates where prediction started.

570x343mm (57 x 57 DPI)

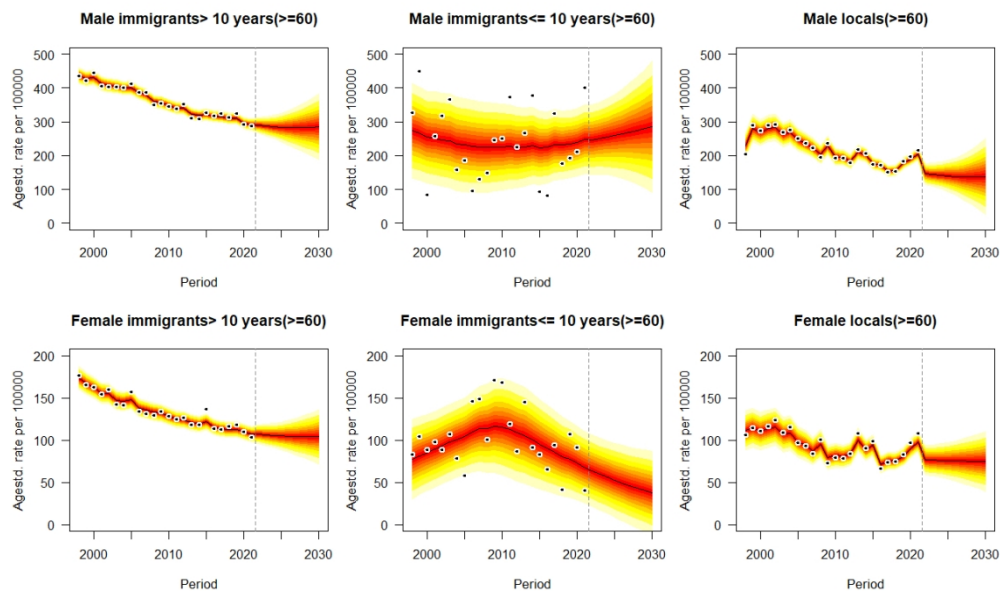

Figure 5. Projections of lung cancer mortality rates for the population older than or equal to 60 by gender and immigrant status from 2022 to 2030. Observations are shown as dots with the predictive distribution between the 5% and 95% quantile, whereby each lighter shade of red represents an additional 10% predictive CI. The predictive mean is shown as black solid line and the vertical dashed line indicates where prediction started.

570x343mm (57 x 57 DPI)

1  
2  
3  
4 **Supplementary Material for**  
5  
6  
7

8 **“An age-period-cohort analysis and projection of cancer mortality in**  
9

10 **Hong Kong, 1998–2030”**  
11  
12  
13  
14  
15  
16  
17  
18  
19

20 **APC Figures**

21  
22 eFigure 1(a) Colon cancer .....3  
23 eFigure 1(b) Liver cancer .....4  
24 eFigure 1(c) Pancreatic cancer .....5  
25 eFigure 1(d) Stomach cancer .....6  
26 eFigure 1(e) Prostate cancer .....7  
27  
28  
29  
30  
31

32 **Projection Figures**

33 Colon cancer  
34  
35 eFigure 2(a)Projection (all ages) .....8  
36 eFigure 2(b)Projection (<60 years) .....9  
37 eFigure 2(c)Projection ( $\geq 60$  years) ..... 10  
38  
39  
40 Liver cancer  
41  
42 eFigure 3(a)Projection (all ages) ..... 11  
43 eFigure 3(b)Projection (<60 years) ..... 12  
44 eFigure 3(c)Projection ( $\geq 60$  years) ..... 13  
45  
46  
47 Pancreatic cancer  
48  
49 eFigure 4(a)Projection (all ages) ..... 14  
50 eFigure 4(b)Projection (<60 years) ..... 15  
51 eFigure 4(c)Projection ( $\geq 60$  years) ..... 16  
52  
53  
54 Stomach cancer  
55  
56 eFigure 5(a)Projection (all ages) ..... 17  
57 eFigure 5(b)Projection (<60 years) ..... 18  
58  
59  
60

1  
2  
3  
4  
5  
6  
7  
8  
9  
10  
11  
12  
13  
14  
15  
16  
17  
18  
19  
20  
21  
22  
23  
24  
25  
26  
27  
28  
29  
30  
31  
32  
33  
34  
35  
36  
37  
38  
39  
40  
41  
42  
43  
44  
45  
46  
47  
48  
49  
50  
51  
52  
53  
54  
55  
56  
57  
58  
59  
60

eFigure 5(c)Projection ( $\geq 60$  years)..... 19

Prostate cancer

eFigure 6 Projection (all ages,  $< 60$  years and  $\geq 60$  years)..... 20

**Tables**

eTable 1 Lung cancer..... 21

eTable 2 Colon cancer..... 22

eTable 3 Liver cancer ..... 23

eTable 4 Pancreatic cancer ..... 24

eTable 5 Stomach cancer ..... 25

eTable 6 Prostate cancer ..... 26

peer review only

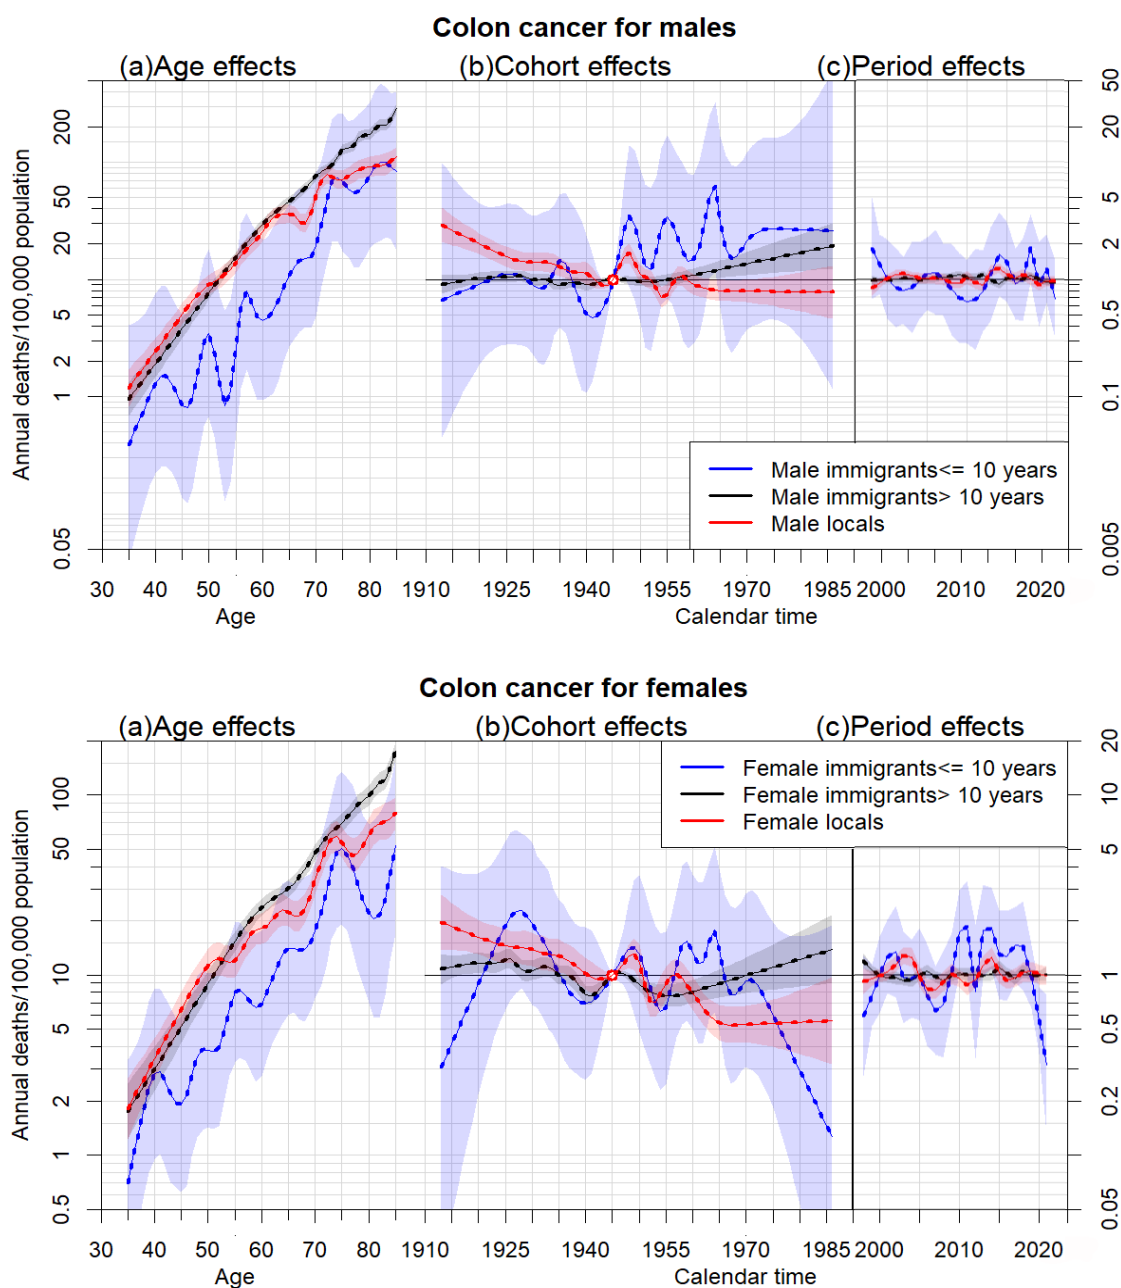

**eFigure 1(a).** Parameter estimates of age (a), cohort (b) and period (c) effects based on an age-period-cohort model of male and female colon cancer mortality rates by immigrant groups: locals, immigrants stay in Hong Kong for more than 10 years and immigrants stay in Hong Kong for less than or equal to 10 years. Age effect was assessed by mortality (left axis). Cohort and period effects were assessed by relative risk (right axis), 95% confidence intervals are shown as shaded bands.



**eFigure 1(b).** Parameter estimates of age (a), cohort (b) and period (c) effects based on an age-period-cohort model of male and female liver cancer mortality rates by immigrant groups: locals, immigrants stay in Hong Kong for more than 10 years and immigrants stay in Hong Kong for less than or equal to 10 years. Age effect was assessed by mortality (left axis). Cohort and period effects were assessed by relative risk (right axis), 95% confidence intervals are shown as shaded bands.



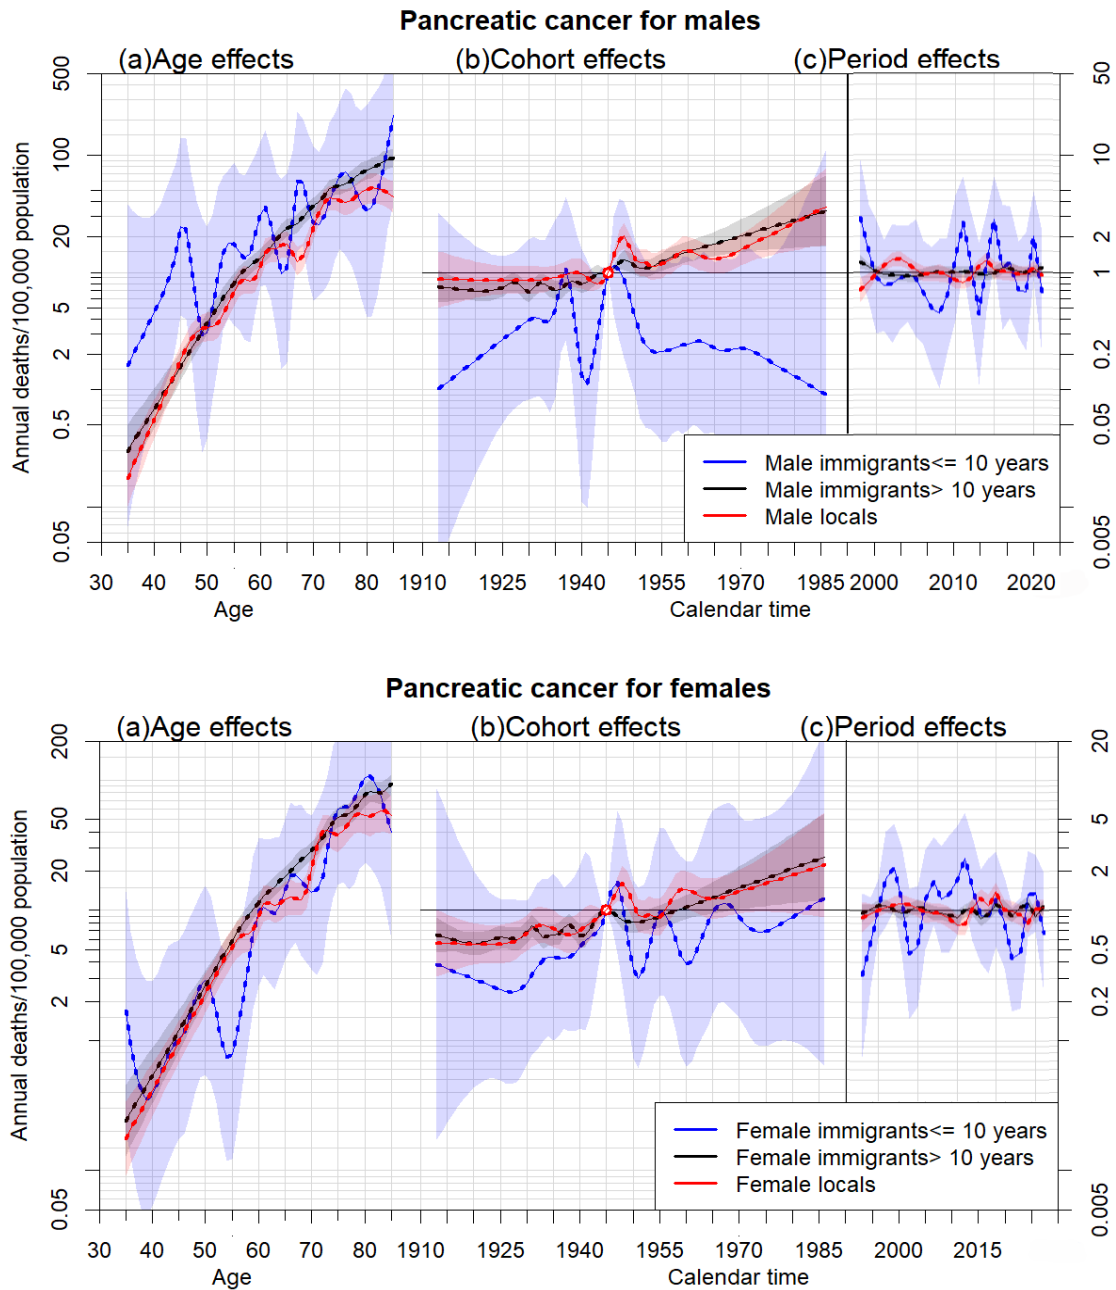

**eFigure 1(c).** Parameter estimates of age (a), cohort (b) and period (c) effects based on an age-period-cohort model of male and female pancreatic cancer mortality rates by immigrant groups: locals, immigrants stay in Hong Kong for more than 10 years and immigrants stay in Hong Kong for less than or equal to 10 years. Age effect was assessed by mortality (left axis). Cohort and period effects were assessed by relative risk (right axis), 95% confidence intervals are shown as shaded bands.



**eFigure 1(d).** Parameter estimates of age (a), cohort (b) and period (c) effects based on an age-period-cohort model of male and female stomach cancer mortality rates by immigrant groups: locals, immigrants stay in Hong Kong for more than 10 years and immigrants stay in Hong Kong for less than or equal to 10 years. Age effect was assessed by mortality (left axis). Cohort and period effects were assessed by relative risk (right axis), 95% confidence intervals are shown as shaded bands.



**eFigure 1(e).** Parameter estimates of age (a), cohort (b) and period (c) effects based on an age-period-cohort model of male prostate cancer mortality rates by immigrant groups: locals, immigrants stay in Hong Kong for more than 10 years and immigrants stay in Hong Kong for less than or equal to 10 years. Age effect was assessed by mortality (left axis). Cohort and period effects were assessed by relative risk (right axis), 95% confidence intervals are shown as shaded bands.



**eFigure 2(a).** Projections of colon cancer mortality rates by gender and immigrant status from 2022 to 2030. Observations are shown as dots with the predictive distribution between the 5% and 95% quantile, whereby each lighter shade of red represents an additional 10% predictive CI. The predictive mean is shown as black solid line and the vertical dashed line indicates where prediction started.

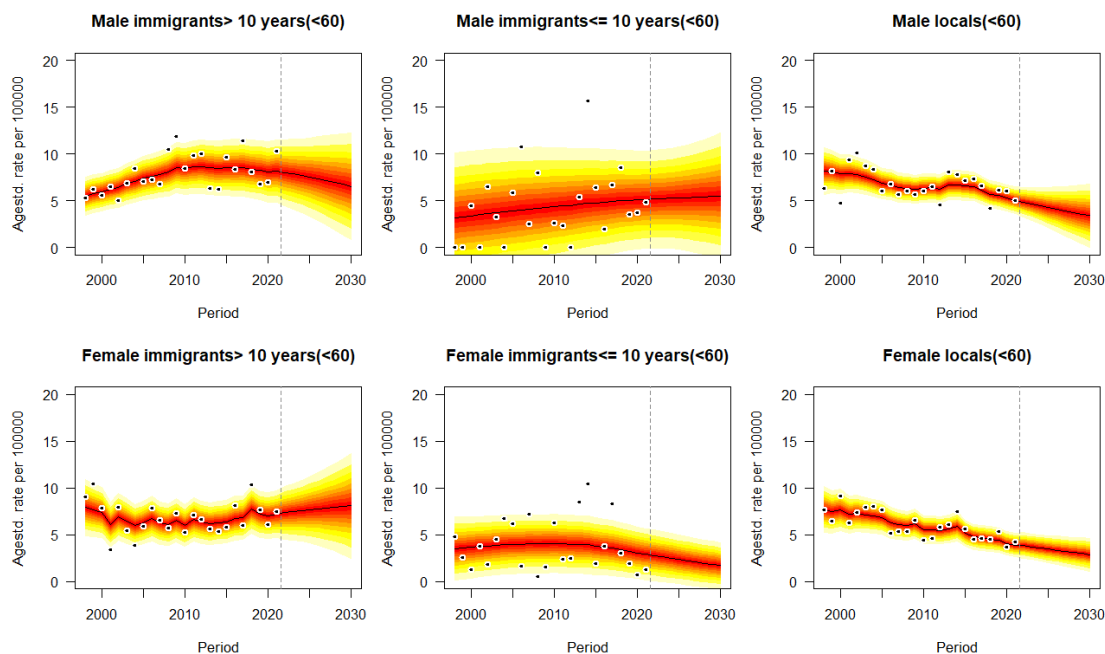

**eFigure 2(b).** Projections of colon cancer mortality rates for the population younger than 60 by gender and immigrant status from 2022 to 2030. Observations are shown as dots with the predictive distribution between the 5% and 95% quantile, whereby each lighter shade of red represents an additional 10% predictive CI. The predictive mean is shown as black solid line and the vertical dashed line indicates where prediction started.

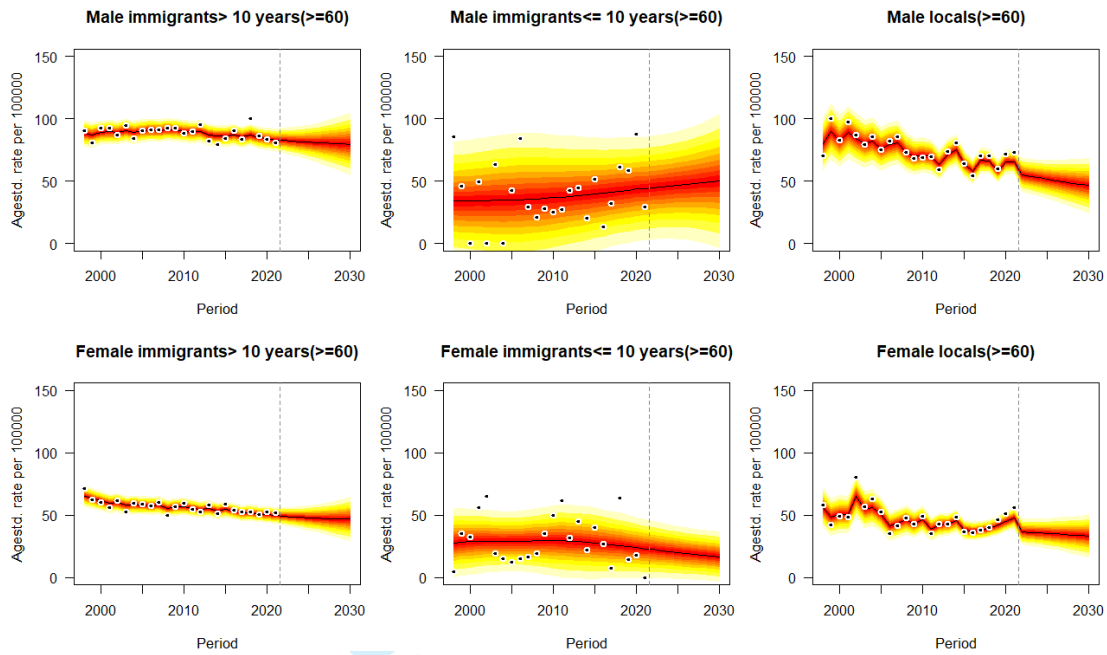

**eFigure 2(c).** Projections of colon cancer mortality rates for the population older than or equal to 60 by gender and immigrant status from 2022 to 2030. Observations are shown as dots with the predictive distribution between the 5% and 95% quantile, whereby each lighter shade of red represents an additional 10% predictive CI. The predictive mean is shown as black solid line and the vertical dashed line indicates where prediction started.



**eFigure 3(a).** Projections of liver cancer mortality rates by gender and immigrant status from 2022 to 2030. Observations are shown as dots with the predictive distribution between the 5% and 95% quantile, whereby each lighter shade of red represents an additional 10% predictive CI. The predictive mean is shown as black solid line and the vertical dashed line indicates where prediction started.

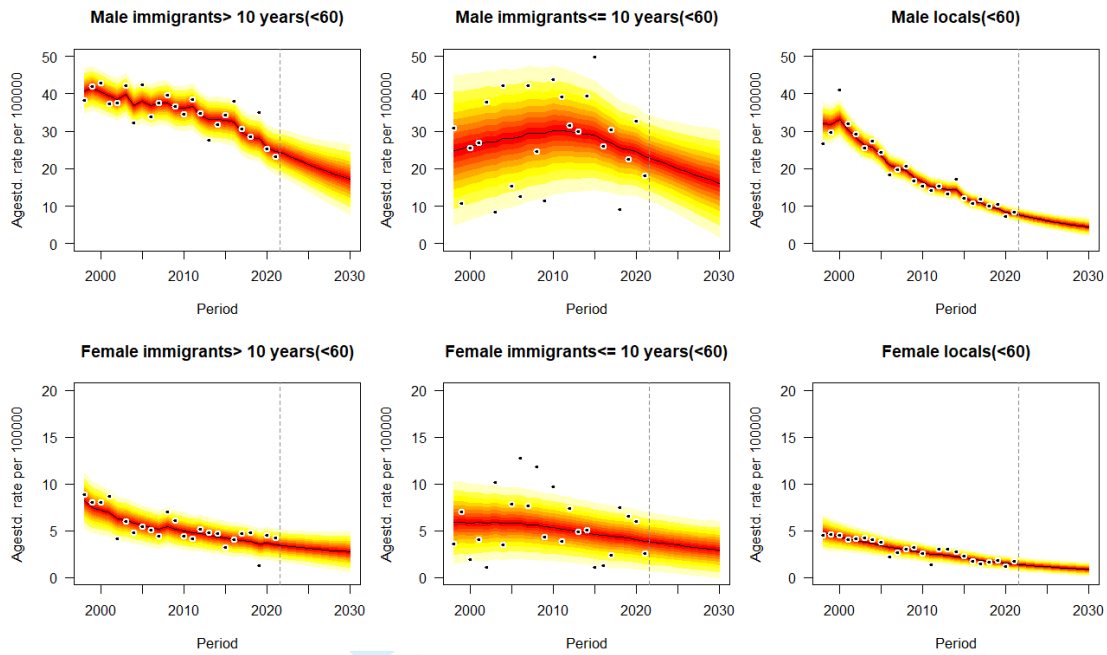

**eFigure 3(b).** Projections of liver cancer mortality rates for the population younger than 60 by gender and immigrant status from 2022 to 2030. Observations are shown as dots with the predictive distribution between the 5% and 95% quantile, whereby each lighter shade of red represents an additional 10% predictive CI. The predictive mean is shown as black solid line and the vertical dashed line indicates where prediction started.



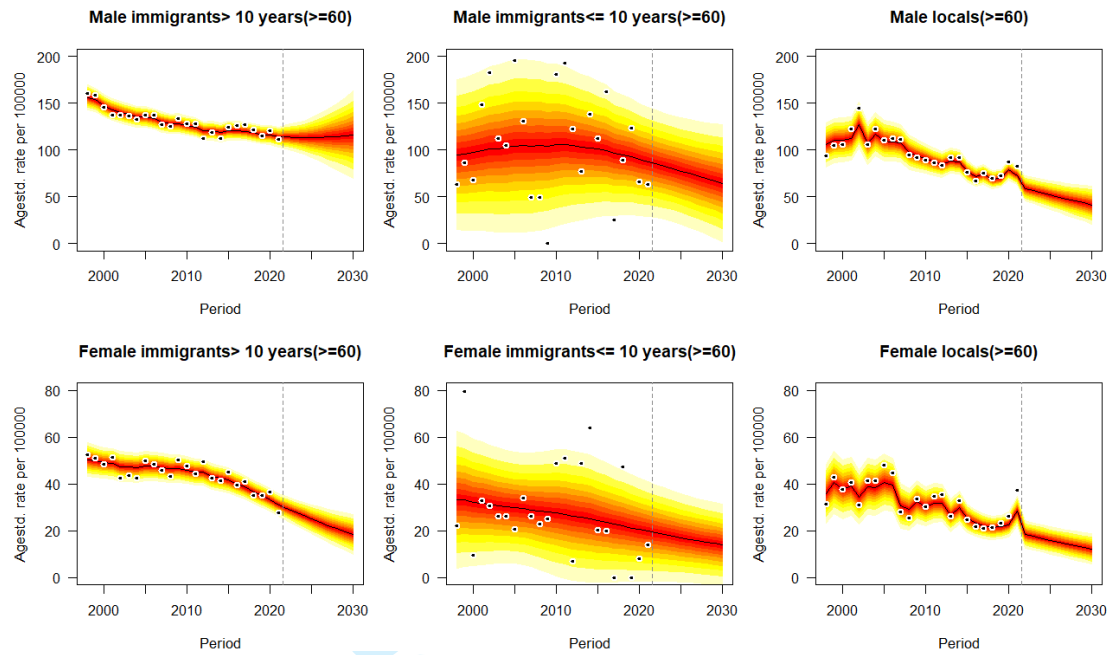

**eFigure 3(c).** Projections of liver cancer mortality rates for the population older than or equal to 60 by gender and immigrant status from 2022 to 2030. Observations are shown as dots with the predictive distribution between the 5% and 95% quantile, whereby each lighter shade of red represents an additional 10% predictive CI. The predictive mean is shown as black solid line and the vertical dashed line indicates where prediction started.

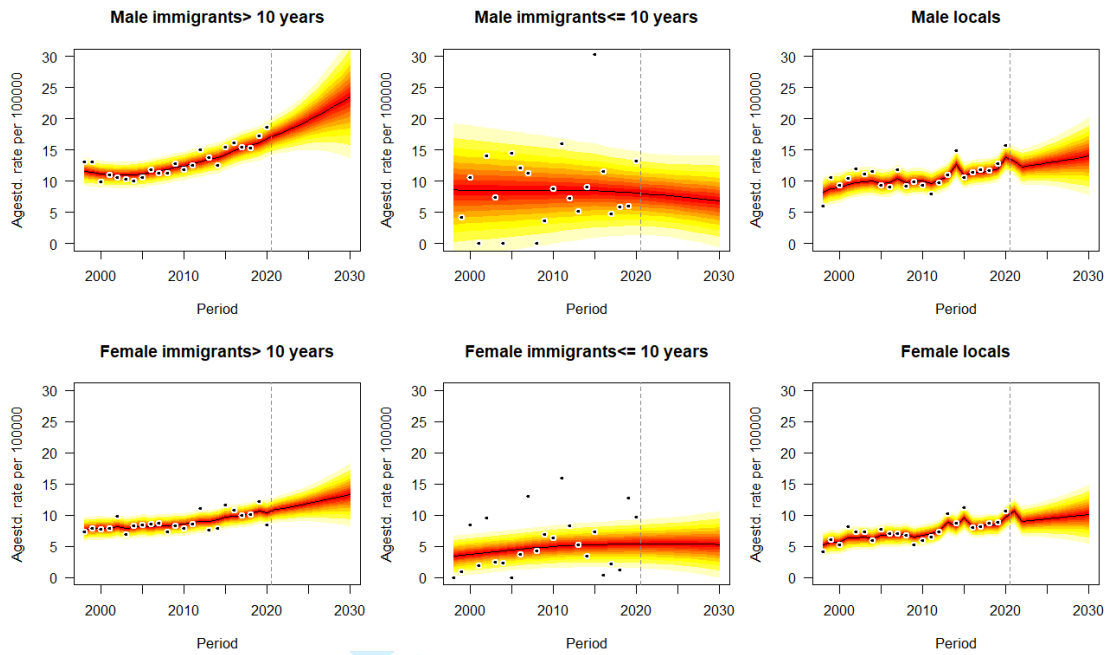

**eFigure 4(a).** Projections of pancreatic cancer mortality rates by gender and immigrant status from 2022 to 2030. Observations are shown as dots with the predictive distribution between the 5% and 95% quantile, whereby each lighter shade of red represents an additional 10% predictive CI. The predictive mean is shown as black solid line and the vertical dashed line indicates where prediction started.



**eFigure 4(b).** Projections of pancreatic cancer mortality rates for the population younger than 60 by gender and immigrant status from 2022 to 2030. Observations are shown as dots with the predictive distribution between the 5% and 95% quantile, whereby each lighter shade of red represents an additional 10% predictive CI. The predictive mean is shown as black solid line and the vertical dashed line indicates where prediction started.



**eFigure 4(c).** Projections of pancreatic cancer mortality rates for the population older than or equal to 60 by gender and immigrant status from 2022 to 2030. Observations are shown as dots with the predictive distribution between the 5% and 95% quantile, whereby each lighter shade of red represents an additional 10% predictive CI. The predictive mean is shown as black solid line and the vertical dashed line indicates where prediction started.



**eFigure 5(a).** Projections of stomach cancer mortality rates by gender and immigrant status from 2022 to 2030. Observations are shown as dots with the predictive distribution between the 5% and 95% quantile, whereby each lighter shade of red represents an additional 10% predictive CI. The predictive mean is shown as black solid line and the vertical dashed line indicates where prediction started.



**eFigure 5(b).** Projections of stomach cancer mortality rates for the population younger than 60 by gender and immigrant status from 2022 to 2030. Observations are shown as dots with the predictive distribution between the 5% and 95% quantile, whereby each lighter shade of red represents an additional 10% predictive CI. The predictive mean is shown as black solid line and the vertical dashed line indicates where prediction started.

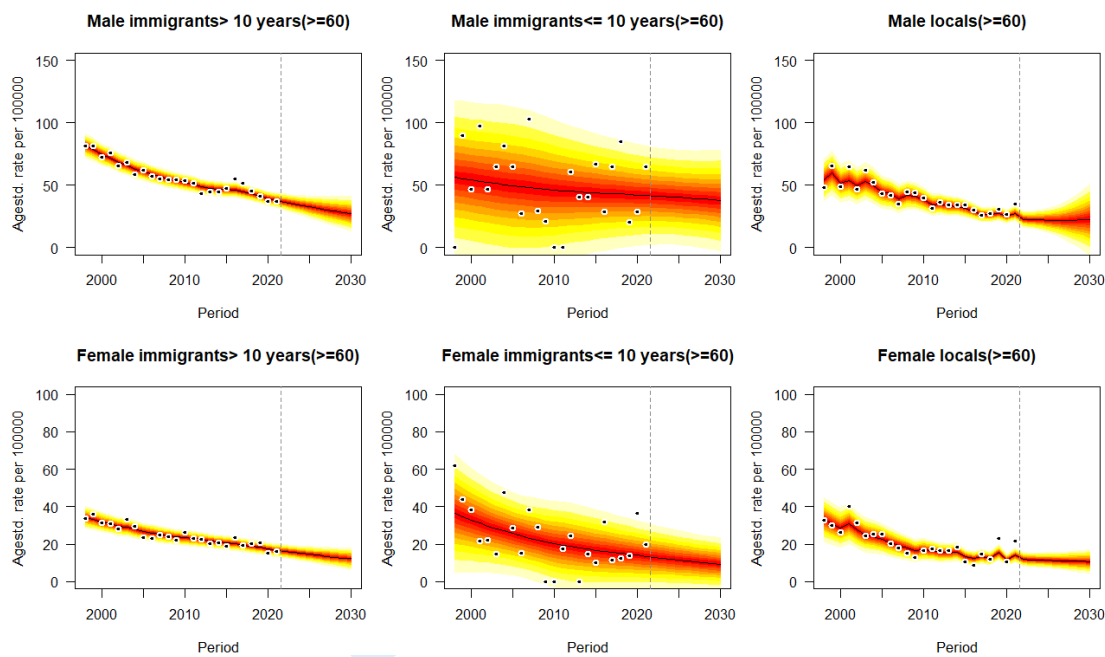

**eFigure 5(c).** Projections of stomach cancer mortality rates for the population older than or equal to 60 by gender and immigrant status from 2022 to 2030. Observations are shown as dots with the predictive distribution between the 5% and 95% quantile, whereby each lighter shade of red represents an additional 10% predictive CI. The predictive mean is shown as black solid line and the vertical dashed line indicates where prediction started.

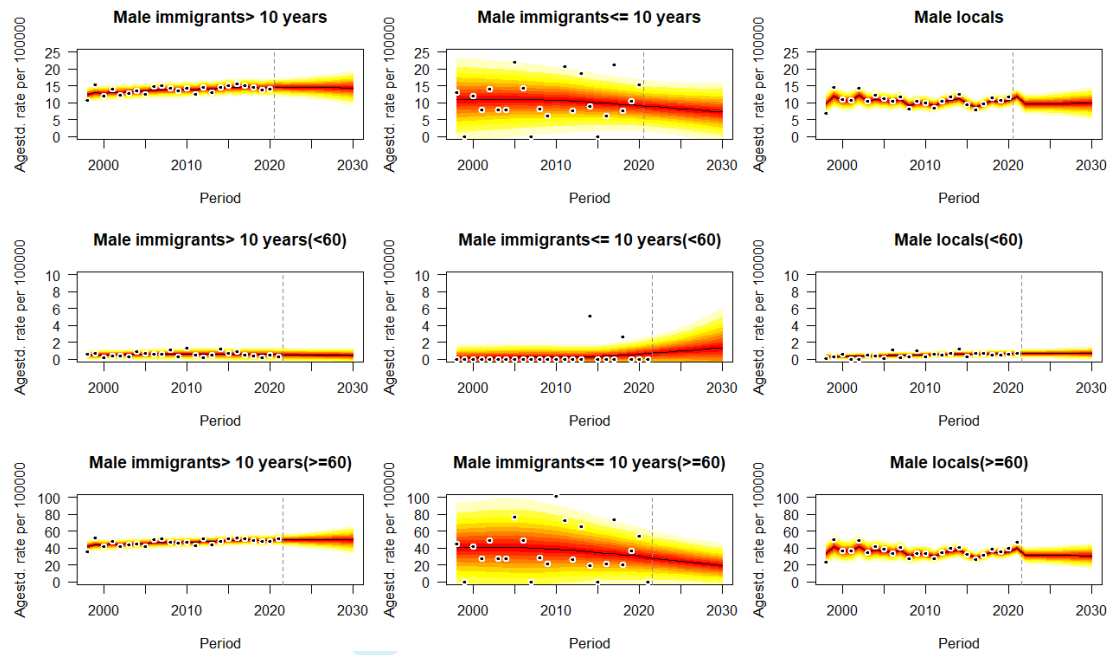

**eFigure 6.** Projections of prostate cancer mortality rates for males by immigrant status and age groups (less than, greater than or equal to 60 years old) from 2022 to 2030. Observations are shown as dots with the predictive distribution between the 5% and 95% quantile, whereby each lighter shade of red represents an additional 10% predictive CI. The predictive mean is shown as black solid line and the vertical dashed line indicates where prediction started.



| Predictive mean of age-standardized mortality rates of lung cancer per 100,000 population |                   |                   |                   |                   |                   |                   |                   |                   |                   |                    |
|-------------------------------------------------------------------------------------------|-------------------|-------------------|-------------------|-------------------|-------------------|-------------------|-------------------|-------------------|-------------------|--------------------|
| Year                                                                                      | 2021              | 2022              | 2023              | 2024              | 2025              | 2026              | 2027              | 2028              | 2029              | 2030               |
| Female immigrants >10                                                                     | 41.80<br>(1.27)   | 41.34<br>(1.86)   | 40.58<br>(2.27)   | 39.87<br>(2.75)   | 39.19<br>(3.28)   | 38.53<br>(3.86)   | 37.89<br>(4.46)   | 37.26<br>(5.09)   | 36.65<br>(5.74)   | 36.04<br>(6.4)     |
| Female immigrants ≤ 10                                                                    | 23.92<br>(4.00)   | 22.22<br>(4.67)   | 20.56<br>(5.38)   | 19.01<br>(6.10)   | 17.57<br>(6.80)   | 16.24<br>(7.45)   | 15.00<br>(8.04)   | 13.85<br>(8.56)   | 12.79<br>(9.01)   | 11.81<br>(9.39)    |
| Female locals                                                                             | 34.67<br>(1.76)   | 30.22<br>(3.54)   | 30.63<br>(4.77)   | 31.05<br>(6.38)   | 31.48<br>(8.29)   | 31.9<br>(10.47)   | 32.32<br>(12.87)  | 32.73<br>(15.48)  | 33.15<br>(18.31)  | 33.55<br>(21.33)   |
| Male immigrants >10                                                                       | 102.90<br>(2.43)  | 100.18<br>(4.18)  | 97.18<br>(5.33)   | 94.34<br>(6.72)   | 91.71<br>(8.24)   | 89.15<br>(9.84)   | 86.66<br>(11.47)  | 84.19<br>(13.11)  | 81.81<br>(14.74)  | 79.55<br>(16.37)   |
| Male immigrants ≤10                                                                       | 81.26<br>(9.21)   | 79.90<br>(10.41)  | 79.81<br>(11.82)  | 79.72<br>(13.42)  | 79.62<br>(15.19)  | 79.50<br>(17.09)  | 79.32<br>(19.09)  | 79.08<br>(21.18)  | 78.78<br>(23.32)  | 78.41<br>(25.53)   |
| Male locals                                                                               | 60.96<br>(2.82)   | 52.27<br>(4.86)   | 50.83<br>(5.39)   | 49.56<br>(6.13)   | 48.18<br>(6.97)   | 46.64<br>(7.84)   | 45.13<br>(8.76)   | 43.83<br>(9.76)   | 42.67<br>(10.8)   | 41.43<br>(11.8)    |
| Female immigrants >10(<60y)                                                               | 15.51<br>(1.12)   | 14.51<br>(1.50)   | 13.90<br>(1.76)   | 13.29<br>(2.04)   | 12.71<br>(2.33)   | 12.13<br>(2.62)   | 11.57<br>(2.91)   | 11.02<br>(3.18)   | 10.49<br>(3.43)   | 9.98<br>(3.68)     |
| Female immigrants ≤ 10(<60y)                                                              | 8.14<br>(1.91)    | 7.79<br>(1.95)    | 7.18(2.23)        | 6.62(2.53)        | 6.10(2.81)        | 5.63(3.08)        | 5.19(3.32)        | 4.79<br>(3.53)    | 4.42<br>(3.72)    | 4.09<br>(3.88)     |
| Female locals(<60y)                                                                       | 10.25<br>(0.77)   | 9.48<br>(0.89)    | 9.17(1.02)        | 8.87(1.16)        | 8.57(1.32)        | 8.27(1.49)        | 7.97(1.65)        | 7.68<br>(1.82)    | 7.38<br>(1.98)    | 7.09<br>(2.13)     |
| Male immigrants >10(<60y)                                                                 | 27.81<br>(2.10)   | 26.36<br>(3.58)   | 24.96<br>(3.94)   | 23.64<br>(4.35)   | 22.38<br>(4.79)   | 21.17<br>(5.23)   | 20.03<br>(5.67)   | 18.96<br>(6.10)   | 17.96<br>(6.51)   | 17.03<br>(6.90)    |
| Male immigrants ≤ 10(<60y)                                                                | 15.01<br>(2.98)   | 13.38<br>(3.71)   | 12.02<br>(4.17)   | 10.79<br>(4.59)   | 9.68<br>(4.95)    | 8.69<br>(5.24)    | 7.79<br>(5.46)    | 6.98<br>(5.61)    | 6.25<br>(5.69)    | 5.59<br>(5.72)     |
| Male locals(<60y)                                                                         | 15.19<br>(0.78)   | 14.45<br>(1.15)   | 14.03<br>(1.29)   | 13.61<br>(1.46)   | 13.14<br>(1.64)   | 12.65<br>(1.82)   | 12.13<br>(2.01)   | 11.55<br>(2.17)   | 10.93<br>(2.31)   | 10.26<br>(2.43)    |
| Female immigrants >10(≥ 60y)                                                              | 108.85<br>(4.80)  | 107.21<br>(5.17)  | 106.26<br>(6.24)  | 105.52<br>(7.54)  | 104.94<br>(9.04)  | 104.51<br>(10.72) | 104.21<br>(12.57) | 104.07<br>(14.61) | 104.06<br>(16.78) | 104.16<br>(19.14)  |
| Female immigrants ≤ 10(≥60y)                                                              | 66.16<br>(13.25)  | 63.84<br>(15.72)  | 59.88<br>(17.50)  | 56.14<br>(19.31)  | 52.60<br>(21.03)  | 49.27<br>(22.66)  | 46.14<br>(24.16)  | 43.20<br>(25.52)  | 40.44<br>(26.74)  | 37.85<br>(27.81)   |
| Female locals(≥60y)                                                                       | 77.33<br>(9.40)   | 76.53<br>(10.11)  | 76.22<br>(10.85)  | 75.94<br>(11.79)  | 75.69<br>(12.94)  | 75.49<br>(14.28)  | 75.32<br>(15.80)  | 75.19<br>(17.48)  | 75.10<br>(19.33)  | 75.03<br>(21.32)   |
| Male immigrants >10(≥60y)                                                                 | 293.56<br>(9.13)  | 289.8<br>(11.7)   | 286.6<br>(15.19)  | 284.28<br>(19.51) | 282.78<br>(24.49) | 281.99<br>(30.07) | 281.88<br>(36.31) | 282.31<br>(43.15) | 283.37<br>(50.66) | 285.03<br>(58.86)  |
| Male immigrants ≤ 10(≥60y)                                                                | 244.88<br>(30.29) | 247.01<br>(36.85) | 251.24<br>(42.94) | 255.62<br>(50.06) | 260.14<br>(58.14) | 264.82<br>(67.14) | 269.61<br>(77.01) | 274.52<br>(87.75) | 279.55<br>(99.34) | 284.69<br>(111.81) |
| Male locals(≥60y)                                                                         | 150.75<br>(16.22) | 146.29<br>(18.46) | 143.54<br>(20.58) | 141.84<br>(23.97) | 140.07<br>(28.24) | 138.14<br>(33.39) | 136.65<br>(39.82) | 136.49<br>(47.87) | 137.24<br>(57.47) | 138.26<br>(68.52)  |

**eTable 1.** Predictive means and standard deviations (in brackets) of age-standardized mortality rates of lung cancer per 100,000 population for each gender, age group (less than, greater or equal to 60 years old) and immigrant status from 2022 to 2030. Reported means and standard deviations (in brackets) of age-standardized mortality rates in 2021 are also listed.

| Predictive mean of age-standardized mortality rates of colon cancer per 100,000 population |                  |                  |                  |                  |                  |                  |                  |                  |                  |                  |
|--------------------------------------------------------------------------------------------|------------------|------------------|------------------|------------------|------------------|------------------|------------------|------------------|------------------|------------------|
| Year                                                                                       | 2021             | 2022             | 2023             | 2024             | 2025             | 2026             | 2027             | 2028             | 2029             | 2030             |
| Female immigrants >10                                                                      | 20.03<br>(0.95)  | 18.95<br>(1.13)  | 18.77<br>(1.37)  | 18.59<br>(1.66)  | 18.42<br>(1.98)  | 18.27<br>(2.33)  | 18.12<br>(2.71)  | 17.98<br>(3.11)  | 17.85<br>(3.53)  | 17.73<br>(3.96)  |
| Female immigrants ≤ 10                                                                     | 8.11<br>(2.19)   | 7.70<br>(2.51)   | 7.25<br>(2.81)   | 6.82<br>(3.11)   | 6.42<br>(3.37)   | 6.03<br>(3.61)   | 5.67<br>(3.83)   | 5.33<br>(4.01)   | 5.01<br>(4.17)   | 4.71<br>(4.31)   |
| Female locals                                                                              | 13.77<br>(1.30)  | 13.47<br>(1.61)  | 13.24<br>(1.72)  | 13.01<br>(1.87)  | 12.77<br>(2.04)  | 12.53<br>(2.24)  | 12.29<br>(2.46)  | 12.06<br>(2.68)  | 11.82<br>(2.92)  | 11.59<br>(3.16)  |
| Male immigrants >10                                                                        | 31.22<br>(1.28)  | 29.82<br>(1.46)  | 29.66<br>(1.79)  | 29.52<br>(2.19)  | 29.41<br>(2.63)  | 29.30<br>(3.11)  | 29.21<br>(3.64)  | 29.14<br>(4.19)  | 29.06<br>(4.78)  | 28.98<br>(5.39)  |
| Male immigrants ≤10                                                                        | 15.47<br>(2.14)  | 16.77<br>(3.77)  | 17.02<br>(4.18)  | 17.23<br>(4.64)  | 17.45<br>(5.14)  | 17.67<br>(5.69)  | 17.88<br>(6.27)  | 18.09<br>(6.91)  | 18.31<br>(7.56)  | 18.50<br>(8.26)  |
| Male locals                                                                                | 21.28<br>(1.38)  | 19.81<br>(2.07)  | 19.39<br>(2.22)  | 18.97<br>(2.42)  | 18.57<br>(2.61)  | 18.18<br>(2.85)  | 17.81<br>(3.12)  | 17.43<br>(3.40)  | 17.06<br>(3.71)  | 16.71<br>(4.03)  |
| Female immigrants >10(<60y)                                                                | 7.09<br>(0.99)   | 7.36<br>(1.12)   | 7.46<br>(1.28)   | 7.56<br>(1.46)   | 7.65<br>(1.68)   | 7.74<br>(1.92)   | 7.83<br>(2.19)   | 7.92<br>(2.48)   | 8.01<br>(2.79)   | 8.09<br>(3.13)   |
| Female immigrants ≤ 10(<60y)                                                               | 3.11<br>(0.67)   | 2.82<br>(0.86)   | 2.65<br>(0.91)   | 2.51<br>(0.97)   | 2.36<br>(1.02)   | 2.22<br>(1.07)   | 2.08<br>(1.11)   | 1.95<br>(1.14)   | 1.83<br>(1.18)   | 1.72<br>(1.22)   |
| Female locals(<60y)                                                                        | 4.10<br>(0.41)   | 3.87<br>(0.50)   | 3.73<br>(0.54)   | 3.61<br>(0.59)   | 3.47<br>(0.65)   | 3.34<br>(0.70)   | 3.22<br>(0.76)   | 3.11<br>(0.82)   | 2.99<br>(0.88)   | 2.88<br>(0.94)   |
| Male immigrants >10(<60y)                                                                  | 8.29<br>(0.91)   | 7.98<br>(1.17)   | 7.85<br>(1.38)   | 7.71<br>(1.60)   | 7.54<br>(1.83)   | 7.36<br>(2.08)   | 7.17(2.32)       | 6.97(2.57)       | 6.76(2.81)       | 6.55(3.05)       |
| Male immigrants ≤ 10(<60y)                                                                 | 5.03<br>(1.44)   | 5.18<br>(1.58)   | 5.22<br>(1.75)   | 5.26<br>(1.93)   | 5.30<br>(2.14)   | 5.34<br>(2.36)   | 5.38(2.59)       | 5.43(2.84)       | 5.47(3.11)       | 5.51(3.38)       |
| Male locals(<60y)                                                                          | 5.14<br>(0.43)   | 4.88<br>(0.63)   | 4.66<br>(0.79)   | 4.46<br>(0.96)   | 4.26<br>(1.13)   | 4.08<br>(1.31)   | 3.91(1.48)       | 3.73(1.65)       | 3.57(1.82)       | 3.42(1.97)       |
| Female immigrants >10(≥60y)                                                                | 52.16<br>(2.59)  | 49.21<br>(2.99)  | 48.70<br>(3.56)  | 48.26<br>(4.26)  | 47.87<br>(5.05)  | 47.54<br>(5.94)  | 47.26<br>(6.90)  | 47.05<br>(7.94)  | 46.91<br>(9.06)  | 46.81<br>(10.26) |
| Female immigrants ≤ 10(≥60y)                                                               | 24.01<br>(5.83)  | 22.44<br>(6.56)  | 21.69<br>(6.96)  | 20.95<br>(7.38)  | 20.23<br>(7.80)  | 19.52<br>(8.23)  | 18.84<br>(8.66)  | 18.17<br>(9.08)  | 17.51<br>(9.49)  | 16.86<br>(9.90)  |
| Female locals(≥60y)                                                                        | 37.42<br>(5.31)  | 36.69<br>(5.74)  | 36.29<br>(6.06)  | 35.87<br>(6.46)  | 35.46<br>(6.95)  | 35.04<br>(7.5)   | 34.61<br>(8.12)  | 34.19<br>(8.79)  | 33.77<br>(9.51)  | 33.34<br>(10.27) |
| Male immigrants >10(≥60y)                                                                  | 84.17<br>(3.55)  | 82.72<br>(4.09)  | 82.16<br>(4.95)  | 81.64<br>(5.97)  | 81.19<br>(7.12)  | 80.81<br>(8.39)  | 80.47<br>(9.77)  | 80.15<br>(11.24) | 79.85<br>(12.81) | 79.56<br>(14.45) |
| Male immigrants ≤ 10(≥60y)                                                                 | 43.25<br>(11.07) | 44.93<br>(13.09) | 45.62<br>(14.52) | 46.30<br>(16.09) | 46.96<br>(17.80) | 47.61<br>(19.64) | 48.25<br>(21.62) | 48.88<br>(23.73) | 49.51<br>(25.97) | 50.13<br>(28.34) |
| Male locals(≥60y)                                                                          | 55.79<br>(6.86)  | 54.89<br>(7.65)  | 53.75<br>(8.03)  | 52.63<br>(8.52)  | 51.54<br>(9.12)  | 50.47<br>(9.8)   | 49.43<br>(10.55) | 48.42<br>(11.37) | 47.42<br>(12.25) | 46.44<br>(13.16) |

**eTable 2.** Predictive means and standard deviations (in brackets) of age-standardized mortality rates of colon cancer per 100,000 population for each gender, age group (less than, greater or equal to 60 years old) and immigrant status from 2022 to 2030. Reported means and standard deviations (in brackets) of age-standardized mortality rates in 2021 are also listed.

| Predictive mean of age-standardized mortality rates of liver cancer per 100,000 population |                  |                  |                  |                  |                   |                   |                   |                   |                   |                   |
|--------------------------------------------------------------------------------------------|------------------|------------------|------------------|------------------|-------------------|-------------------|-------------------|-------------------|-------------------|-------------------|
| Year                                                                                       | 2021             | 2022             | 2023             | 2024             | 2025              | 2026              | 2027              | 2028              | 2029              | 2030              |
| Female immigrants >10                                                                      | 11.34<br>(0.66)  | 10.68<br>(0.71)  | 10.09<br>(0.85)  | 9.54<br>(1.01)   | 9.01<br>(1.16)    | 8.50<br>(1.31)    | 8.02(1.45)        | 7.57(1.59)        | 7.14(1.72)        | 6.74(1.83)        |
| Female immigrants ≤10                                                                      | 9.15<br>(1.55)   | 8.66<br>(1.82)   | 8.38<br>(1.95)   | 8.11<br>(2.08)   | 7.84<br>(2.22)    | 7.58<br>(2.36)    | 7.32(2.49)        | 7.07(2.63)        | 6.82(2.76)        | 6.58(2.88)        |
| Female locals                                                                              | 6.72<br>(0.69)   | 6.36<br>(0.88)   | 6.08<br>(0.90)   | 5.81<br>(0.93)   | 5.53<br>(0.97)    | 5.26<br>(1.01)    | 5.01(1.06)        | 4.77(1.11)        | 4.53(1.15)        | 4.3(1.21)         |
| Male immigrants >10                                                                        | 52.17<br>(1.78)  | 49.22<br>(2.36)  | 47.76<br>(2.93)  | 46.35<br>(3.59)  | 45.01<br>(4.31)   | 43.67<br>(5.05)   | 42.37<br>(5.81)   | 41.1(6.56)        | 39.89<br>(7.33)   | 38.71<br>(8.08)   |
| Male immigrants ≤10                                                                        | 42.33<br>(5.87)  | 39.03<br>(6.49)  | 37.39<br>(7.47)  | 35.81<br>(8.51)  | 34.26<br>(9.58)   | 32.76<br>(10.63)  | 31.31<br>(11.65)  | 29.91<br>(12.62)  | 28.56<br>(13.54)  | 27.25<br>(14.40)  |
| Male locals                                                                                | 24.22<br>(1.77)  | 22.16<br>(2.09)  | 21.02<br>(2.22)  | 19.91<br>(2.39)  | 18.85<br>(2.58)   | 17.83<br>(2.79)   | 16.85<br>(3.03)   | 15.92<br>(3.21)   | 15.03<br>(3.40)   | 14.18<br>(3.59)   |
| Female immigrants >10(<60y)                                                                | 3.62<br>(0.45)   | 3.39<br>(0.52)   | 3.29<br>(0.57)   | 3.20<br>(0.63)   | 3.12<br>(0.69)    | 3.04<br>(0.75)    | 2.96(0.82)        | 2.89(0.89)        | 2.82(0.96)        | 2.75(1.03)        |
| Female immigrants ≤10(<60y)                                                                | 4.10<br>(0.79)   | 3.81<br>(0.91)   | 3.69<br>(0.96)   | 3.57<br>(1.02)   | 3.46<br>(1.08)    | 3.36<br>(1.15)    | 3.25(1.22)        | 3.15(1.29)        | 3.06(1.36)        | 2.97(1.43)        |
| Female locals(<60y)                                                                        | 1.50<br>(0.13)   | 1.37<br>(0.2)    | 1.29<br>(0.21)   | 1.22<br>(0.23)   | 1.16<br>(0.24)    | 1.10<br>(0.26)    | 1.04(0.27)        | 0.99(0.29)        | 0.94(0.30)        | 0.89(0.31)        |
| Male immigrants >10(<60y)                                                                  | 26.32<br>(2.11)  | 24.04<br>(2.35)  | 23.02<br>(2.63)  | 22.05<br>(2.94)  | 21.13<br>(3.27)   | 20.25<br>(3.61)   | 19.41<br>(3.95)   | 18.62<br>(4.30)   | 17.86<br>(4.64)   | 17.14<br>(4.98)   |
| Male immigrants ≤10(<60y)                                                                  | 25.52<br>(2.99)  | 22.56<br>(3.96)  | 21.71<br>(4.44)  | 20.87<br>(4.94)  | 20.04<br>(5.45)   | 19.22<br>(5.95)   | 18.42<br>(6.45)   | 17.63<br>(6.91)   | 16.86<br>(7.36)   | 16.11<br>(7.78)   |
| Male locals(<60y)                                                                          | 8.25<br>(0.69)   | 7.47<br>(0.74)   | 6.97<br>(0.79)   | 6.52<br>(0.86)   | 6.11<br>(0.93)    | 5.73<br>(1.01)    | 5.38(1.08)        | 5.04(1.15)        | 4.73(1.21)        | 4.44(1.27)        |
| Female immigrants >10(≥60y)                                                                | 33.67<br>(1.88)  | 29.63<br>(2.01)  | 27.99<br>(2.36)  | 26.42<br>(2.75)  | 24.92<br>(3.14)   | 23.49<br>(3.52)   | 22.13<br>(3.88)   | 20.85<br>(4.23)   | 19.64<br>(4.55)   | 18.50<br>(4.85)   |
| Female immigrants ≤10(≥60y)                                                                | 21.72<br>(5.11)  | 19.08<br>(5.81)  | 18.38<br>(6.14)  | 17.71<br>(6.48)  | 17.03<br>(6.83)   | 16.39<br>(7.16)   | 15.76<br>(7.49)   | 15.16<br>(7.80)   | 14.57<br>(8.11)   | 14.01<br>(8.39)   |
| Female locals(≥60y)                                                                        | 20.63<br>(3.03)  | 18.41<br>(3.23)  | 17.55<br>(3.26)  | 16.72<br>(3.32)  | 15.91<br>(3.40)   | 15.11<br>(3.49)   | 14.34<br>(3.59)   | 13.59<br>(3.69)   | 12.87<br>(3.81)   | 12.17<br>(3.93)   |
| Male immigrants >10(≥60y)                                                                  | 115.39<br>(4.54) | 113.96<br>(5.95) | 113.43<br>(7.65) | 113.17<br>(9.70) | 113.16<br>(12.04) | 113.37<br>(14.66) | 113.79<br>(17.56) | 114.39<br>(20.73) | 115.19<br>(24.18) | 116.17<br>(27.91) |
| Male immigrants ≤10(≥60y)                                                                  | 88.61<br>(15.58) | 85.14<br>(18.85) | 82.59<br>(20.6)  | 80.02<br>(22.44) | 77.42<br>(24.34)  | 74.83<br>(26.24)  | 72.23<br>(28.12)  | 69.64<br>(29.94)  | 67.07<br>(31.70)  | 64.52<br>(33.38)  |
| Male locals(≥60y)                                                                          | 62.88<br>(5.97)  | 58.95<br>(7.91)  | 56.51<br>(8.20)  | 54.14<br>(8.61)  | 51.84<br>(9.12)   | 49.61<br>(9.70)   | 47.46<br>(10.33)  | 45.38<br>(11.01)  | 43.38<br>(11.68)  | 41.45<br>(12.36)  |

**eTable 3.** Predictive means and standard deviations (in brackets) of age-standardized mortality rates of liver cancer per 100,000 population for each gender, age group (less than, greater or equal to 60 years old) and immigrant status from 2022 to 2030. Reported means and standard deviations (in brackets) of age-standardized mortality rates in 2021 are also listed.

| Predictive mean of age-standardized mortality rates of pancreatic cancer per 100,000 population |                 |                 |                 |                  |                  |                  |                  |                  |                  |                  |
|-------------------------------------------------------------------------------------------------|-----------------|-----------------|-----------------|------------------|------------------|------------------|------------------|------------------|------------------|------------------|
| Year                                                                                            | 2021            | 2022            | 2023            | 2024             | 2025             | 2026             | 2027             | 2028             | 2029             | 2030             |
| Female immigrants >10                                                                           | 10.89<br>(0.62) | 11.11<br>(0.75) | 11.36<br>(0.91) | 11.61<br>(1.09)  | 11.87<br>(1.31)  | 12.14<br>(1.56)  | 12.42<br>(1.84)  | 12.71<br>(2.15)  | 13.01<br>(2.48)  | 13.3(2.85)       |
| Female immigrants ≤ 10                                                                          | 5.51<br>(1.44)  | 5.44<br>(1.56)  | 5.44<br>(1.69)  | 5.43(1.84)       | 5.42(1.99)       | 5.41(2.15)       | 5.39(2.32)       | 5.36(2.49)       | 5.34(2.66)       | 5.31(2.84)       |
| Female locals                                                                                   | 8.79<br>(1.10)  | 9.01<br>(1.22)  | 9.15<br>(1.34)  | 9.29(1.48)       | 9.43(1.64)       | 9.57(1.83)       | 9.71(2.05)       | 9.85(2.28)       | 9.99(2.54)       | 10.14<br>(2.83)  |
| Male immigrants >10                                                                             | 16.30<br>(0.98) | 17.87<br>(1.19) | 18.48<br>(1.49) | 19.11<br>(1.87)  | 19.78<br>(2.32)  | 20.47<br>(2.83)  | 21.18<br>(3.42)  | 21.92<br>(4.07)  | 22.69<br>(4.81)  | 23.49<br>(5.61)  |
| Male immigrants ≤ 10                                                                            | 8.10<br>(2.02)  | 7.87<br>(2.37)  | 7.76<br>(2.53)  | 7.64(2.70)       | 7.51(2.87)       | 7.38(3.05)       | 7.24(3.23)       | 7.09(3.41)       | 6.95(3.58)       | 6.81(3.75)       |
| Male locals                                                                                     | 11.97<br>(1.26) | 12.29<br>(1.49) | 12.49<br>(1.64) | 12.69<br>(1.83)  | 12.91<br>(2.06)  | 13.11<br>(2.33)  | 13.33<br>(2.63)  | 13.55<br>(2.97)  | 13.78<br>(3.34)  | 14.02<br>(3.74)  |
| Female immigrants >10(<60y)                                                                     | 3.47<br>(0.33)  | 3.62<br>(0.57)  | 3.74<br>(0.66)  | 3.87(0.77)       | 4.01(0.89)       | 4.14(1.02)       | 4.28(1.18)       | 4.42(1.34)       | 4.57(1.53)       | 4.72(1.73)       |
| Female immigrants ≤ 10(<60y)                                                                    | 1.12<br>(0.33)  | 1.21<br>(0.48)  | 1.22<br>(0.52)  | 1.23(0.56)       | 1.24(0.61)       | 1.25(0.66)       | 1.26(0.71)       | 1.26(0.77)       | 1.27(0.83)       | 1.28(0.89)       |
| Female locals(<60y)                                                                             | 2.76<br>(0.27)  | 2.88<br>(0.36)  | 2.91<br>(0.41)  | 2.93(0.48)       | 2.96(0.55)       | 2.99(0.63)       | 3.02(0.71)       | 3.04(0.81)       | 3.07(0.90)       | 3.10(1.01)       |
| Male immigrants >10(<60y)                                                                       | 6.88<br>(0.98)  | 7.05<br>(1.11)  | 7.24<br>(1.32)  | 7.43(1.56)       | 7.62(1.84)       | 7.82(2.16)       | 8.01(2.50)       | 8.21(2.88)       | 8.40(3.30)       | 8.61(3.75)       |
| Male immigrants ≤ 10(<60y)                                                                      | 2.20<br>(0.71)  | 2.01<br>(0.85)  | 1.95<br>(0.91)  | 1.9(0.94)        | 1.84(0.99)       | 1.79(1.04)       | 1.74(1.09)       | 1.69(1.14)       | 1.64(1.19)       | 1.60(1.24)       |
| Male locals(<60y)                                                                               | 4.16<br>(0.35)  | 4.33<br>(0.48)  | 4.41<br>(0.57)  | 4.46(0.68)       | 4.53(0.81)       | 4.61(0.94)       | 4.69(1.09)       | 4.77(1.26)       | 4.85(1.44)       | 4.93(1.63)       |
| Female immigrants >10(≥60y)                                                                     | 28.58<br>(1.83) | 29.45<br>(2.11) | 29.91<br>(2.54) | 30.38<br>(3.06)  | 30.85<br>(3.66)  | 31.33<br>(4.33)  | 31.81<br>(5.08)  | 32.29<br>(5.91)  | 32.78<br>(6.79)  | 33.27<br>(7.74)  |
| Female immigrants ≤ 10(≥60y)                                                                    | 16.79<br>(5.29) | 15.65<br>(6.08) | 15.49<br>(6.71) | 15.33<br>(7.36)  | 15.16<br>(8.03)  | 14.97<br>(8.73)  | 14.79<br>(9.43)  | 14.59<br>(10.14) | 14.39<br>(10.86) | 14.19<br>(11.58) |
| Female locals(≥60y)                                                                             | 22.80<br>(4.23) | 23.85<br>(4.46) | 24.21<br>(4.81) | 24.56<br>(5.23)  | 24.91<br>(5.73)  | 25.25<br>(6.30)  | 25.58<br>(6.95)  | 25.90<br>(7.67)  | 26.22<br>(8.47)  | 26.54<br>(9.34)  |
| Male immigrants >10(≥60y)                                                                       | 42.70<br>(2.55) | 44.36<br>(3.02) | 45.85<br>(3.76) | 47.41<br>(4.69)  | 49.04<br>(5.78)  | 50.73<br>(7.05)  | 52.48<br>(8.50)  | 54.28<br>(10.13) | 56.16<br>(11.95) | 58.11<br>(13.98) |
| Male immigrants ≤ 10(≥60y)                                                                      | 24.68<br>(8.21) | 23.96<br>(9.01) | 23.87<br>(9.74) | 23.75<br>(10.52) | 23.61<br>(11.33) | 23.45<br>(12.17) | 23.28<br>(13.04) | 23.09<br>(13.93) | 22.89<br>(14.83) | 22.68<br>(15.75) |
| Male locals(≥60y)                                                                               | 30.10<br>(4.68) | 31.17<br>(5.22) | 31.55<br>(5.63) | 31.93<br>(6.14)  | 32.30<br>(6.75)  | 32.66<br>(7.45)  | 33.01<br>(8.23)  | 33.35<br>(9.11)  | 33.69<br>(10.08) | 34.03<br>(11.12) |

**eTable 4.** Predictive means and standard deviations (in brackets) of age-standardized mortality rates of pancreatic cancer per 100,000 population for each gender, age group (less than, greater or equal to 60 years old) and immigrant status from 2022 to 2030. Reported means and standard deviations (in brackets) of age-standardized mortality rates in 2021 are also listed.

| Predictive mean of age-standardized mortality rates of stomach cancer per 100,000 population |                  |                  |                  |                  |                  |                  |                  |                  |                  |                  |
|----------------------------------------------------------------------------------------------|------------------|------------------|------------------|------------------|------------------|------------------|------------------|------------------|------------------|------------------|
| Year                                                                                         | 2021             | 2022             | 2023             | 2024             | 2025             | 2026             | 2027             | 2028             | 2029             | 2030             |
| Female immigrants >10                                                                        | 8.20<br>(0.55)   | 7.95<br>(0.62)   | 7.71<br>(0.74)   | 7.47<br>(0.87)   | 7.25<br>(1.01)   | 7.03<br>(1.15)   | 6.83<br>(1.29)   | 6.62<br>(1.43)   | 6.43<br>(1.57)   | 6.24<br>(1.71)   |
| Female immigrants ≤ 10                                                                       | 7.51<br>(1.44)   | 7.36<br>(1.56)   | 7.33<br>(1.69)   | 7.30<br>(1.85)   | 7.28<br>(2.01)   | 7.27<br>(2.20)   | 7.27<br>(2.40)   | 7.28<br>(2.61)   | 7.31<br>(2.84)   | 7.33<br>(3.09)   |
| Female locals                                                                                | 5.26<br>(0.40)   | 4.91<br>(0.52)   | 4.75<br>(0.57)   | 4.61<br>(0.63)   | 4.47<br>(0.71)   | 4.34<br>(0.77)   | 4.21<br>(0.84)   | 4.08<br>(0.91)   | 3.95<br>(0.99)   | 3.83<br>(1.06)   |
| Male immigrants >10                                                                          | 15.22<br>(0.64)  | 13.89<br>(0.97)  | 13.34(1.21)      | 12.81<br>(1.46)  | 12.31<br>(1.73)  | 11.83<br>(1.99)  | 11.38<br>(2.26)  | 10.95<br>(2.51)  | 10.54<br>(2.76)  | 10.15<br>(3.01)  |
| Male immigrants ≤10                                                                          | 15.83<br>(3.04)  | 15.21<br>(3.38)  | 15.07<br>(3.67)  | 14.93<br>(3.98)  | 14.79<br>(4.31)  | 14.64<br>(4.65)  | 14.51<br>(5.02)  | 14.35<br>(5.39)  | 14.19<br>(5.78)  | 14.03<br>(6.17)  |
| Male locals                                                                                  | 8.14<br>(0.89)   | 8.07<br>(0.99)   | 7.73<br>(1.03)   | 7.41(1.07)       | 7.10<br>(1.13)   | 6.81<br>(1.19)   | 6.51<br>(1.26)   | 6.23<br>(1.33)   | 5.97<br>(1.39)   | 5.71<br>(1.46)   |
| Female immigrants >10(<60y)                                                                  | 4.81<br>(0.56)   | 4.69<br>(0.79)   | 4.62<br>(0.87)   | 4.55<br>(0.96)   | 4.47<br>(1.07)   | 4.39<br>(1.17)   | 4.31<br>(1.29)   | 4.22<br>(1.41)   | 4.13<br>(1.52)   | 4.03<br>(1.64)   |
| Female immigrants ≤ 10(<60y)                                                                 | 3.89<br>(0.80)   | 4.08<br>(0.93)   | 4.10<br>(1.03)   | 4.13<br>(1.14)   | 4.17<br>(1.27)   | 4.21<br>(1.41)   | 4.24<br>(1.55)   | 4.28<br>(1.70)   | 4.32<br>(1.87)   | 4.36<br>(2.05)   |
| Female locals(<60y)                                                                          | 2.28<br>(0.21)   | 2.08<br>(0.27)   | 1.98<br>(0.29)   | 1.88<br>(0.32)   | 1.79<br>(0.35)   | 1.71<br>(0.37)   | 1.61<br>(0.41)   | 1.53<br>(0.43)   | 1.44<br>(0.45)   | 1.37<br>(0.47)   |
| Male immigrants >10(<60y)                                                                    | 4.94<br>(0.57)   | 4.71<br>(0.79)   | 4.55<br>(0.89)   | 4.41<br>(0.99)   | 4.25<br>(1.10)   | 4.12<br>(1.21)   | 3.98<br>(1.32)   | 3.86<br>(1.43)   | 3.74<br>(1.54)   | 3.63<br>(1.65)   |
| Male immigrants ≤ 10(<60y)                                                                   | 4.81<br>(1.31)   | 4.70<br>(1.42)   | 4.66<br>(1.55)   | 4.63<br>(1.69)   | 4.59<br>(1.83)   | 4.55<br>(1.99)   | 4.52<br>(2.15)   | 4.48<br>(2.32)   | 4.44<br>(2.50)   | 4.41<br>(2.68)   |
| Male locals(<60y)                                                                            | 2.48<br>(0.21)   | 2.37<br>(0.29)   | 2.28<br>(0.32)   | 2.21<br>(0.35)   | 2.12<br>(0.38)   | 2.04<br>(0.42)   | 1.97<br>(0.45)   | 1.91<br>(0.49)   | 1.83<br>(0.52)   | 1.77(0.55)       |
| Female immigrants >10(≥60y)                                                                  | 17.80<br>(1.04)  | 16.23<br>(1.26)  | 15.65<br>(1.47)  | 15.08<br>(1.70)  | 14.55<br>(1.94)  | 14.03<br>(2.18)  | 13.54<br>(2.43)  | 13.07<br>(2.68)  | 12.62<br>(2.92)  | 12.19<br>(3.16)  |
| Female immigrants ≤ 10(≥60y)                                                                 | 14.72<br>(4.29)  | 13.01<br>(4.83)  | 12.52<br>(5.11)  | 12.03<br>(5.37)  | 11.55<br>(5.63)  | 11.08<br>(5.88)  | 10.63<br>(6.12)  | 10.19<br>(6.35)  | 9.76(6.56)       | 9.34<br>(6.75)   |
| Female locals(≥60y)                                                                          | 12.20<br>(1.66)  | 11.86<br>(1.84)  | 11.67<br>(1.98)  | 11.49<br>(2.15)  | 11.33<br>(2.35)  | 11.18<br>(2.58)  | 11.04<br>(2.84)  | 10.91<br>(3.11)  | 10.79(3.4)       | 10.68<br>(3.71)  |
| Male immigrants >10(≥ 60y)                                                                   | 37.23<br>(2.29)  | 36.59<br>(2.56)  | 35.17(3.18)      | 33.82<br>(3.86)  | 32.55<br>(4.57)  | 31.34<br>(5.28)  | 30.19<br>(6.01)  | 29.08<br>(6.70)  | 28.02<br>(7.40)  | 27.01<br>(8.07)  |
| Male immigrants ≤ 10(≥60y)                                                                   | 42.30<br>(10.88) | 41.43<br>(11.78) | 41.03<br>(12.71) | 40.61<br>(13.70) | 40.17<br>(14.75) | 39.71<br>(15.85) | 39.24<br>(16.99) | 38.75<br>(18.16) | 38.23<br>(19.35) | 37.71<br>(20.57) |
| Male locals(≥60y)                                                                            | 23.04<br>(3.29)  | 22.69<br>(3.56)  | 22.37(4.07)      | 22.16(4.84)      | 21.89<br>(5.86)  | 21.61<br>(7.22)  | 21.52<br>(9.02)  | 21.74<br>(11.29) | 22.17<br>(14.03) | 22.73<br>(17.28) |

**eTable 5.** Predictive means and standard deviations (in brackets) of age-standardized mortality rates of stomach cancer per 100,000 population for each gender, age group (less than, greater or equal to 60 years old) and immigrant status from 2022 to 2030. Reported means and standard deviations (in brackets) of age-standardized mortality rates in 2021 are also listed.

| Predictive mean of age-standardized mortality rates of prostate cancer per 100,000 population |                 |                 |                  |                 |                  |                  |                  |                  |                  |                 |
|-----------------------------------------------------------------------------------------------|-----------------|-----------------|------------------|-----------------|------------------|------------------|------------------|------------------|------------------|-----------------|
| Year                                                                                          | 2021            | 2022            | 2023             | 2024            | 2025             | 2026             | 2027             | 2028             | 2029             | 2030            |
| Male immigrants >10                                                                           | 14.81<br>(0.61) | 14.59<br>(0.79) | 14.57<br>(0.96)  | 14.56<br>(1.15) | 14.54<br>(1.37)  | 14.51<br>(1.61)  | 14.48<br>(1.86)  | 14.45<br>(2.13)  | 14.42<br>(2.42)  | 14.38<br>(2.72) |
| Male immigrants ≤10                                                                           | 9.03<br>(2.95)  | 8.78<br>(3.11)  | 8.58<br>(3.29)   | 8.39<br>(3.49)  | 8.19(3.69)       | 8.10(3.89)       | 7.82(4.11)       | 7.63(4.31)       | 7.45(4.51)       | 7.27(4.72)      |
| Male locals                                                                                   | 9.54<br>(1.40)  | 9.66<br>(1.57)  | 9.67<br>(1.66)   | 9.69<br>(1.77)  | 9.72(1.91)       | 9.75(2.06)       | 9.78(2.23)       | 9.82(2.43)       | 9.86(2.64)       | 9.9(2.88)       |
| Male immigrants >10(<60y)                                                                     | 0.57<br>(0.12)  | 0.52<br>(0.17)  | 0.51<br>(0.19)   | 0.50<br>(0.21)  | 0.49(0.22)       | 0.48(0.24)       | 0.47(0.25)       | 0.46(0.27)       | 0.45(0.29)       | 0.44(0.31)      |
| Male immigrants ≤10(<60y)                                                                     | 0.65<br>(0.59)  | 0.73<br>(0.77)  | 0.81<br>(0.93)   | 0.87<br>(1.10)  | 0.94(1.31)       | 1.01(1.51)       | 1.09(1.75)       | 1.16(2.02)       | 1.24(2.32)       | 1.33(2.64)      |
| Male locals(<60y)                                                                             | 0.63<br>(0.12)  | 0.66<br>(0.14)  | 0.66<br>(0.16)   | 0.66<br>(0.19)  | 0.67(0.21)       | 0.67(0.24)       | 0.67(0.27)       | 0.68(0.31)       | 0.68(0.33)       | 0.69(0.37)      |
| Male immigrants >10(≥60y)                                                                     | 49.43<br>(2.59) | 49.61<br>(2.73) | 49.63<br>(3.29)  | 49.64<br>(3.94) | 49.64<br>(4.68)  | 49.64<br>(5.51)  | 49.63<br>(6.38)  | 49.62<br>(7.32)  | 49.61<br>(8.32)  | 49.58(9.37)     |
| Male immigrants ≤10(≥60y)                                                                     | 28.29<br>(9.15) | 27.66<br>(9.78) | 26.53<br>(10.21) | 25.4<br>(10.63) | 24.28<br>(11.03) | 23.16<br>(11.41) | 22.07<br>(11.76) | 21.01<br>(12.09) | 19.96<br>(12.38) | 18.95(12.63)    |
| Male locals(≥60y)                                                                             | 31.57<br>(5.17) | 31.48<br>(5.49) | 31.40<br>(5.76)  | 31.32<br>(6.09) | 31.24<br>(6.48)  | 31.15<br>(6.94)  | 31.06<br>(7.44)  | 30.96<br>(8.01)  | 30.86<br>(8.61)  | 30.74(9.26)     |

**eTable 6.** Predictive means and standard deviations (in brackets) of age-standardized mortality rates of prostate cancer per 100,000 population for each age group (less than, greater or equal to 60 years old) and immigrant status from 2022 to 2030. Reported means and standard deviations (in brackets) of age-standardized mortality rates in 2021 are also listed.

# Reporting checklist for cohort study.

Based on the STROBE cohort guidelines.

## Instructions to authors

Complete this checklist by entering the page numbers from your manuscript where readers will find each of the items listed below.

Your article may not currently address all the items on the checklist. Please modify your text to include the missing information. If you are certain that an item does not apply, please write "n/a" and provide a short explanation.

Upload your completed checklist as an extra file when you submit to a journal.

In your methods section, say that you used the STROBE cohort reporting guidelines, and cite them as:

von Elm E, Altman DG, Egger M, Pocock SJ, Gøtzsche PC, Vandenbroucke JP. The Strengthening of Reporting of Observational Studies in Epidemiology (STROBE) Statement: guidelines for reporting observational studies.

|                           |                     | Reporting Item                                                                                  | Page Number |
|---------------------------|---------------------|-------------------------------------------------------------------------------------------------|-------------|
| <b>Title and abstract</b> |                     |                                                                                                 |             |
| Title                     | <a href="#">#1a</a> | Indicate the study's design with a commonly used term in the title or the abstract              | 1           |
| Abstract                  | <a href="#">#1b</a> | Provide in the abstract an informative and balanced summary of what was done and what was found | 2           |
| <b>Introduction</b>       |                     |                                                                                                 |             |
| Background / rationale    | <a href="#">#2</a>  | Explain the scientific background and rationale for the investigation being reported            | 4           |
| Objectives                | <a href="#">#3</a>  | State specific objectives, including any prespecified hypotheses                                | 4           |
| <b>Methods</b>            |                     |                                                                                                 |             |
| Study design              | <a href="#">#4</a>  | Present key elements of study design early in the paper                                         | 5           |
| Setting                   | <a href="#">#5</a>  | Describe the setting, locations, and relevant dates, including periods                          | 5           |



|    |                      |                      |                                                                                                                                                                                                                                                                      |     |
|----|----------------------|----------------------|----------------------------------------------------------------------------------------------------------------------------------------------------------------------------------------------------------------------------------------------------------------------|-----|
| 1  |                      |                      | of recruitment, exposure, follow-up, and data collection                                                                                                                                                                                                             |     |
| 2  | Eligibility criteria | <a href="#">#6a</a>  | Give the eligibility criteria, and the sources and methods of selection of participants. Describe methods of follow-up.                                                                                                                                              | 5   |
| 3  |                      |                      |                                                                                                                                                                                                                                                                      |     |
| 4  |                      |                      |                                                                                                                                                                                                                                                                      |     |
| 5  |                      |                      |                                                                                                                                                                                                                                                                      |     |
| 6  | Eligibility criteria | <a href="#">#6b</a>  | For matched studies, give matching criteria and number of exposed and unexposed                                                                                                                                                                                      | n/a |
| 7  |                      |                      |                                                                                                                                                                                                                                                                      |     |
| 8  |                      |                      |                                                                                                                                                                                                                                                                      |     |
| 9  |                      |                      |                                                                                                                                                                                                                                                                      |     |
| 10 | Variables            | <a href="#">#7</a>   | Clearly define all outcomes, exposures, predictors, potential confounders, and effect modifiers. Give diagnostic criteria, if applicable                                                                                                                             | 5   |
| 11 |                      |                      |                                                                                                                                                                                                                                                                      |     |
| 12 |                      |                      |                                                                                                                                                                                                                                                                      |     |
| 13 |                      |                      |                                                                                                                                                                                                                                                                      |     |
| 14 |                      |                      |                                                                                                                                                                                                                                                                      |     |
| 15 | Data sources /       | <a href="#">#8</a>   | For each variable of interest give sources of data and details of methods of assessment (measurement). Describe comparability of assessment methods if there is more than one group. Give information separately for for exposed and unexposed groups if applicable. | 5   |
| 16 | measurement          |                      |                                                                                                                                                                                                                                                                      |     |
| 17 |                      |                      |                                                                                                                                                                                                                                                                      |     |
| 18 |                      |                      |                                                                                                                                                                                                                                                                      |     |
| 19 |                      |                      |                                                                                                                                                                                                                                                                      |     |
| 20 |                      |                      |                                                                                                                                                                                                                                                                      |     |
| 21 |                      |                      |                                                                                                                                                                                                                                                                      |     |
| 22 | Bias                 | <a href="#">#9</a>   | Describe any efforts to address potential sources of bias                                                                                                                                                                                                            | 5   |
| 23 |                      |                      |                                                                                                                                                                                                                                                                      |     |
| 24 | Study size           | <a href="#">#10</a>  | Explain how the study size was arrived at                                                                                                                                                                                                                            | 5   |
| 25 |                      |                      |                                                                                                                                                                                                                                                                      |     |
| 26 |                      |                      |                                                                                                                                                                                                                                                                      |     |
| 27 | Quantitative         | <a href="#">#11</a>  | Explain how quantitative variables were handled in the analyses. If applicable, describe which groupings were chosen, and why                                                                                                                                        | 5   |
| 28 | variables            |                      |                                                                                                                                                                                                                                                                      |     |
| 29 |                      |                      |                                                                                                                                                                                                                                                                      |     |
| 30 |                      |                      |                                                                                                                                                                                                                                                                      |     |
| 31 | Statistical          | <a href="#">#12a</a> | Describe all statistical methods, including those used to control for confounding                                                                                                                                                                                    |     |
| 32 | methods              |                      |                                                                                                                                                                                                                                                                      |     |
| 33 |                      |                      |                                                                                                                                                                                                                                                                      |     |
| 34 | 5                    |                      |                                                                                                                                                                                                                                                                      |     |
| 35 |                      |                      |                                                                                                                                                                                                                                                                      |     |
| 36 |                      |                      |                                                                                                                                                                                                                                                                      |     |
| 37 | Statistical          | <a href="#">#12b</a> | Describe any methods used to examine subgroups and interactions                                                                                                                                                                                                      | 5   |
| 38 | methods              |                      |                                                                                                                                                                                                                                                                      |     |
| 39 |                      |                      |                                                                                                                                                                                                                                                                      |     |
| 40 |                      |                      |                                                                                                                                                                                                                                                                      |     |
| 41 | Statistical          | <a href="#">#12c</a> | Explain how missing data were addressed                                                                                                                                                                                                                              | 5   |
| 42 | methods              |                      |                                                                                                                                                                                                                                                                      |     |
| 43 |                      |                      |                                                                                                                                                                                                                                                                      |     |
| 44 | Statistical          | <a href="#">#12d</a> | If applicable, explain how loss to follow-up was addressed                                                                                                                                                                                                           | n/a |
| 45 | methods              |                      |                                                                                                                                                                                                                                                                      |     |
| 46 |                      |                      |                                                                                                                                                                                                                                                                      |     |
| 47 |                      |                      |                                                                                                                                                                                                                                                                      |     |
| 48 | Statistical          | <a href="#">#12e</a> | Describe any sensitivity analyses                                                                                                                                                                                                                                    |     |
| 49 | methods              |                      |                                                                                                                                                                                                                                                                      |     |
| 50 |                      |                      |                                                                                                                                                                                                                                                                      |     |
| 51 |                      |                      |                                                                                                                                                                                                                                                                      |     |
| 52 | n/a                  |                      |                                                                                                                                                                                                                                                                      |     |
| 53 |                      |                      |                                                                                                                                                                                                                                                                      |     |
| 54 | <b>Results</b>       |                      |                                                                                                                                                                                                                                                                      |     |
| 55 |                      |                      |                                                                                                                                                                                                                                                                      |     |
| 56 |                      |                      |                                                                                                                                                                                                                                                                      |     |
| 57 | Participants         | <a href="#">#13a</a> | Report numbers of individuals at each stage of study—eg numbers potentially eligible, examined for eligibility, confirmed eligible,                                                                                                                                  | n/a |
| 58 |                      |                      |                                                                                                                                                                                                                                                                      |     |
| 59 |                      |                      |                                                                                                                                                                                                                                                                      |     |
| 60 |                      |                      |                                                                                                                                                                                                                                                                      |     |



included in the study, completing follow-up, and analysed. Give information separately for for exposed and unexposed groups if applicable.

|    |                  |                      |                                                                            |
|----|------------------|----------------------|----------------------------------------------------------------------------|
| 1  |                  |                      |                                                                            |
| 2  |                  |                      |                                                                            |
| 3  |                  |                      |                                                                            |
| 4  |                  |                      |                                                                            |
| 5  |                  |                      |                                                                            |
| 6  | Participants     | <a href="#">#13b</a> | Give reasons for non-participation at each stage 5                         |
| 7  |                  |                      |                                                                            |
| 8  | Participants     | <a href="#">#13c</a> | Consider use of a flow diagram                                             |
| 9  |                  |                      |                                                                            |
| 10 | n/a              |                      |                                                                            |
| 11 |                  |                      |                                                                            |
| 12 | Descriptive data | <a href="#">#14a</a> | Give characteristics of study participants (eg demographic, clinical, 5    |
| 13 |                  |                      | social) and information on exposures and potential confounders. Give       |
| 14 |                  |                      | information separately for exposed and unexposed groups if                 |
| 15 |                  |                      | applicable.                                                                |
| 16 |                  |                      |                                                                            |
| 17 |                  |                      |                                                                            |
| 18 |                  |                      |                                                                            |
| 19 | Descriptive data | <a href="#">#14b</a> | Indicate number of participants with missing data for each variable of     |
| 20 |                  |                      | interest                                                                   |
| 21 |                  |                      |                                                                            |
| 22 |                  |                      |                                                                            |
| 23 | n/a              |                      |                                                                            |
| 24 |                  |                      |                                                                            |
| 25 | Descriptive data | <a href="#">#14c</a> | Summarise follow-up time (eg, average and total amount)                    |
| 26 |                  |                      |                                                                            |
| 27 | n/a              |                      |                                                                            |
| 28 |                  |                      |                                                                            |
| 29 |                  |                      |                                                                            |
| 30 | Outcome data     | <a href="#">#15</a>  | Report numbers of outcome events or summary measures over time.            |
| 31 |                  |                      | Give information separately for exposed and unexposed groups if            |
| 32 |                  |                      | applicable.                                                                |
| 33 |                  |                      |                                                                            |
| 34 |                  |                      |                                                                            |
| 35 | n/a              |                      |                                                                            |
| 36 |                  |                      |                                                                            |
| 37 |                  |                      |                                                                            |
| 38 | Main results     | <a href="#">#16a</a> | Give unadjusted estimates and, if applicable, confounder-adjusted 6        |
| 39 |                  |                      | estimates and their precision (eg, 95% confidence interval). Make          |
| 40 |                  |                      | clear which confounders were adjusted for and why they were                |
| 41 |                  |                      | included                                                                   |
| 42 |                  |                      |                                                                            |
| 43 |                  |                      |                                                                            |
| 44 | Main results     | <a href="#">#16b</a> | Report category boundaries when continuous variables were  n/a             |
| 45 |                  |                      | categorized                                                                |
| 46 |                  |                      |                                                                            |
| 47 |                  |                      |                                                                            |
| 48 | Main results     | <a href="#">#16c</a> | If relevant, consider translating estimates of relative risk into absolute |
| 49 |                  |                      | risk for a meaningful time period                                          |
| 50 |                  |                      |                                                                            |
| 51 |                  |                      |                                                                            |
| 52 | n/a              |                      |                                                                            |
| 53 |                  |                      |                                                                            |
| 54 | Other analyses   | <a href="#">#17</a>  | Report other analyses done—eg analyses of subgroups and 7                  |
| 55 |                  |                      | interactions, and sensitivity analyses                                     |
| 56 |                  |                      |                                                                            |
| 57 |                  |                      |                                                                            |

## Discussion

|    |                    |                     |                                                                          |    |
|----|--------------------|---------------------|--------------------------------------------------------------------------|----|
| 1  | Key results        | <a href="#">#18</a> | Summarise key results with reference to study objectives                 | 8  |
| 2  |                    |                     |                                                                          |    |
| 3  | Limitations        | <a href="#">#19</a> | Discuss limitations of the study, taking into account sources of         | 10 |
| 4  |                    |                     | potential bias or imprecision. Discuss both direction and magnitude of   |    |
| 5  |                    |                     | any potential bias.                                                      |    |
| 6  |                    |                     |                                                                          |    |
| 7  |                    |                     |                                                                          |    |
| 8  | Interpretation     | <a href="#">#20</a> | Give a cautious overall interpretation considering objectives,           | 8  |
| 9  |                    |                     | limitations, multiplicity of analyses, results from similar studies, and |    |
| 10 |                    |                     | other relevant evidence.                                                 |    |
| 11 |                    |                     |                                                                          |    |
| 12 |                    |                     |                                                                          |    |
| 13 | Generalisability   | <a href="#">#21</a> | Discuss the generalisability (external validity) of the study results    | 9  |
| 14 |                    |                     |                                                                          |    |
| 15 |                    |                     |                                                                          |    |
| 16 | <b>Other</b>       |                     |                                                                          |    |
| 17 | <b>Information</b> |                     |                                                                          |    |
| 18 |                    |                     |                                                                          |    |
| 19 |                    |                     |                                                                          |    |
| 20 | Funding            | <a href="#">#22</a> | Give the source of funding and the role of the funders for the present   | 11 |
| 21 |                    |                     | study and, if applicable, for the original study on which the present    |    |
| 22 |                    |                     | article is based                                                         |    |
| 23 |                    |                     |                                                                          |    |
| 24 |                    |                     |                                                                          |    |

The STROBE checklist is distributed under the terms of the Creative Commons Attribution License CC-BY. This checklist was completed on 11. February 2023 using <https://www.goodreports.org/>, a tool made by the [EQUATOR Network](#) in collaboration with [Penelope.ai](#)
